# Supplementary material for: Characterization of the Ferroptosis-Related Genes for Prognosis and Immune Infiltration in Low-Grade Glioma
Source: Front Genet. 2022 Apr 26;13:880864. doi: 10.3389/fgene.2022.880864 (PMC9086515; doi:10.3389/fgene.2022.880864)
Supplement: Supplementary file 1 [file Table3.XLSX]

## Sheet: Sheet1
Table S3. Data for Univariate Cox regression analysis in the TCGA dataset
id	futime	fustat	RPL8	IREB2	ATP5MC3	CS	EMC2	ACSF2	NOX1	CYBB	NOX3	NOX4	NOX5	DUOX1	DUOX2	G6PD	PGD	VDAC2	PIK3CA	FLT3	SCP2	TP53	ACSL4	LPCAT3	NRAS	KRAS	HRAS	TF	TFRC	TFR2	SLC38A1	SLC1A5	GLS2	GOT1	ALOX5	KEAP1	HMOX1	ATG5	ATG7	NCOA4	ALOX12	ALOX12B	ALOX15	ALOX15B	ALOXE3	PHKG2	ACO1	ULK1	ATG3
TCGA-CS-5397	196	1	211.284	6.18248	21.6047	23.2066	12.8462	5.42543	0.51056	24.6158	0	0.190892	0.0293053	0.203253	0.00972593	10.822	42.2867	13.8263	3.61975	0.0344956	16.102	18.0509	11.0604	2.86091	16.1844	7.98787	19.2768	32.9108	22.8168	0.607419	16.8544	4.75067	0.327208	38.0764	5.09422	21.5907	8.16593	5.98435	3.99738	42.7654	0.298585	0.306092	0.0140489	0.426422	0.216218	2.89138	6.27504	7.47382	7.18393
TCGA-DU-8163	631	0	303.724	5.9295	14.1476	24.6814	14.6956	2.94593	0.362155	25.1552	0.06541	0.0907727	0.0457543	0.640814	0.0407466	7.18176	42.3501	16.685	3.9557	0.224807	14.4446	15.8039	8.20054	2.79048	14.6421	6.85946	13.8219	48.5882	4.97651	0.320215	11.8697	5.54908	0.0691175	14.4446	8.75273	26.6404	19.6285	6.71433	3.2835	57.0467	1.01386	0.0502889	0.00560548	0.0630153	0.0253737	3.06964	8.09461	7.03751	8.11826
TCGA-QH-A6CW	416	0	1058.77	4.21866	9.57752	22.2486	20.1316	3.2438	0.455402	11.8928	0.0205095	0.103052	0.0284536	0.741394	0.0212937	9.51878	45.9752	16.481	3.56012	0.0855935	11.2227	16.6096	5.43172	1.77715	12.647	4.55683	30.0098	17.2925	3.194	0.186043	13.758	8.72927	0.050568	7.0319	3.37401	29.3475	17.4139	4.54508	3.06766	38.3792	0.760443	0.417858	0.00615164	6.50751	0.13923	3.44402	6.31116	11.9619	6.3667
TCGA-E1-A7Z6	986	1	231.087	4.16123	12.3578	19.0043	18.991	4.28871	0.47992	6.81601	0.345122	0.0481695	0.00469413	0.684183	0.0218972	9.7643	29.3708	21.7366	4.76766	0.0800177	16.3374	4.45635	6.48468	2.26213	8.41742	5.49857	18.383	11.6999	8.0295	0.197114	15.2758	5.75768	0.0898203	11.9928	3.40614	26.8163	12.9666	5.54648	4.35492	39.2962	0.688456	0.110558	0.0230036	11.3009	0.0520641	3.43866	8.72957	8.02805	7.93167
TCGA-S9-A6TS	1893	1	427.417	3.36134	22.2602	30.9842	14.9617	3.91071	0.790732	13.1378	0.0094165	0.078857	0.0122954	0.772729	0.0997206	13.0281	32.9076	25.078	2.22912	0.18031	14.3154	18.1635	6.47144	1.79873	13.0264	5.32193	26.6233	15.4524	10.1713	0.425191	7.34388	7.74449	0.222885	25.2096	3.1446	29.9496	21.3152	7.10184	2.81254	35.6191	0.970245	0.246148	0.0225952	0.482617	0.306837	5.01134	5.48731	10.38	9.61581
TCGA-FG-5965	981	0	169.015	5.68253	24.1701	23.8938	14.7617	2.81147	0.705601	11.458	0.0291294	0.474868	0.00316959	1.59359	0.0846807	14.6206	58.4393	19.2873	3.21713	0.30511	18.8987	28.4213	5.74268	1.48968	24.0344	7.29882	21.6882	104.13	10.4429	0.403203	13.896	3.33828	0.0574568	15.0341	4.00269	30.7454	62.9282	9.07856	3.0887	45.1038	0.591183	0.0223954	0.0174742	10.7126	0.0632789	3.86303	7.67901	11.1412	12.5207
TCGA-S9-A89V	571	0	158.494	6.20147	14.0974	22.187	12.1237	4.07762	0.253237	15.4011	0	0.0955079	0.235784	1.16213	0.0296022	7.93241	29.2678	27.4872	6.6361	1.3299	14.3644	5.08847	7.01563	3.26534	13.719	6.2591	15.6179	205.218	10.1601	1.70124	31.0961	3.73932	0.46866	22.2894	9.09485	31.7502	6.60894	7.02547	2.0631	58.6546	1.56534	0.0730693	0.0228052	0.153822	0.165168	3.23066	10.1852	7.70625	7.58376
TCGA-TM-A7C5	1502	0	575.958	3.24677	10.0915	37.0733	8.97541	0.815066	0.464495	2.08341	0.089487	0.0984919	0.0187788	0.386339	0.0238907	7.01003	38.2856	33.3903	4.18018	0.125533	10.4953	17.927	10.5639	2.16019	10.5557	7.78634	19.3884	7.8451	6.08347	0.360775	23.8969	0.869632	0.151295	17.6723	0.531891	33.4134	5.85048	7.19149	2.15445	61.1561	0.648624	0.353828	0.0153376	0.370706	0.208282	2.98974	11.0189	6.2894	8.58621
TCGA-DH-A7US	401	0	349.351	3.60624	11.2871	22.8572	12.7463	2.86428	0.580624	5.065	0.0276576	0.209997	0.049656	1.04158	0.0344581	10.6234	25.3378	23.0942	2.80854	0.131268	6.29032	19.61	4.98593	1.98018	7.05379	5.65903	23.5879	149.785	3.99332	0.732211	35.4125	1.85318	0.113654	15.1444	1.15578	36.2848	10.1838	6.62921	2.8474	41.6065	0.827579	0.184287	0.110609	0.44142	0.0751023	4.38488	6.89733	9.44498	8.97691
TCGA-DU-5852	207	1	383.938	5.09426	13.3208	30.8412	7.37183	3.10754	0.487271	32.1616	0	0.686248	0.0168484	0.443022	0.0131906	11.4057	57.8062	13.4844	3.96449	0.0467841	14.1392	19.4526	5.66184	1.95261	15.7262	6.2509	29.6131	22.6929	22.8735	0.406565	14.8481	15.8642	0.105722	17.4989	6.92489	30.3382	20.4756	7.1208	3.24549	37.7241	0.601229	0.0610489	0.0285804	0.369487	0.120747	2.85683	7.43875	5.76079	8.33416
TCGA-FG-5963	549	0	157.411	10.8525	13.0098	25.6388	5.45123	2.77974	0.796468	5.50725	0	1.80581	0.102965	0.949241	0.104795	13.5832	114.424	14.6065	3.55146	0.0901052	17.2963	38.9231	5.87825	2.65198	36.4461	12.2305	9.19688	4.8785	9.14953	1.57686	18.5503	8.75151	0.101809	10.9862	1.9089	15.7868	9.33947	5.93098	3.3649	29.7207	0.590915	0.0881842	1.73392	0.719359	0	4.1204	8.19373	12.5236	5.42329
TCGA-DU-7007	1917	1	542.153	6.04947	8.40203	21.89	10.1265	3.13615	0.381174	23.6339	0	0.4917	0.0373218	0.320658	0.0107216	9.48249	56.5117	19.3141	5.4113	0.199189	18.7767	7.74547	12.3739	23.969	20.8956	36.5894	5.84945	9.78129	9.19171	0.14869	9.21788	4.33517	0.0290989	15.168	4.70849	29.9244	27.7134	12.8866	3.68842	50.8109	1.84824	0.0283553	0.0176996	0.154205	0.00400594	3.74904	6.51937	5.90377	7.32782
TCGA-DB-A64X	565	0	297.07	3.47893	20.5993	26.3992	21.1475	6.25774	0.956271	4.43283	0.116319	0.0177108	0.0155333	0.60472	0.0131745	7.8885	41.9264	31.9426	1.66117	0.0571105	13.7748	13.8028	5.84339	0.987106	12.1627	5.28734	32.7272	14.7483	7.75616	0.230211	5.32978	2.71532	0.0677876	20.8892	1.14043	34.8553	11.5821	5.95404	2.59125	40.6555	0.775893	0.121948	0.0380604	0.413603	0.0918849	4.32779	6.36785	8.5912	9.20465
TCGA-DH-A669	921	1	1194.83	1.72817	10.3013	31.6754	7.67893	4.28279	1.4302	4.93325	0	1.27696	0.00628485	0.355821	0.137926	16.1383	58.3825	34.4961	0.967102	0.0236324	11.2406	19.7923	6.01521	0.919427	10.2993	3.48622	72.1091	7.22035	5.47826	0.256148	28.1681	3.56335	0.0759524	29.4375	1.44928	61.6222	23.7279	6.67846	2.3256	34.5873	0.563573	1.03616	0.0577481	0.20774	0.203894	6.73049	11.0659	7.56532	9.70488
TCGA-DU-5870	5548	0	560.651	4.0118	17.1513	30.2859	11.4309	1.30732	0.87526	2.77798	0.12861	0.0861623	0.0134944	1.44577	0.497868	13.5848	28.5745	32.3418	2.99989	0.211989	8.93554	24.7162	7.55906	1.29822	7.36605	6.75387	45.6726	21.2117	8.64801	0.63702	28.3226	1.42436	0.11778	22.1715	0.387245	41.9067	7.21491	6.57719	2.66314	40.8655	0.573662	0.833408	0.0881728	0.204438	0.0449013	6.02808	7.37687	8.79502	10.8881
TCGA-CS-4943	554	0	720.082	8.27036	15.2071	36.5081	13.2929	1.73619	0.448419	19.9208	0.0154267	0.0749295	0.0201432	0.658073	0.0304315	9.04955	70.379	29.0221	4.51048	0.102253	12.2232	38.7805	7.04424	1.37006	26.7256	24.1028	16.6172	23.8716	5.1404	0.457128	21.716	4.88783	0.0342324	17.5896	3.20926	35.1281	48.9025	8.09649	3.51819	71.44	0.999472	0.0652326	0.0231356	0.12484	0.0754023	2.95129	10.1217	5.89409	9.19113
TCGA-HT-7607	98	1	157.255	4.53649	18.4227	22.8742	12.1016	2.21457	0.287557	4.90241	0.0145362	0.0608655	0.0177941	0.268646	0.00905518	11.4562	28.1967	19.5401	3.54832	0.346146	10.6365	8.04289	12.5695	1.62392	8.00284	10.311	19.2923	73.1381	10.8389	1.24533	24.9037	2.01776	0.817157	87.071	1.55974	22.13	5.5046	7.5052	4.14176	47.2896	0.27232	0.435856	0.02616	0.661689	0.418402	2.87579	5.68906	8.74919	7.45351
TCGA-VV-A86M	489	0	779.684	5.5949	16.5357	34.4095	8.20386	1.85132	0.931269	22.3281	0	0.425861	0.0171135	1.06639	0.136076	9.48156	62.2615	27.18	6.76835	0.0257402	20.6276	15	10.3591	1.72192	23.5812	5.47217	17.6257	1.39988	2.85721	0.227212	7.21797	7.7993	0.0904824	10.8312	4.0181	29.8873	14.6448	7.05476	2.56635	49.7409	1.1663	0.272068	0.00786234	1.53792	0.0498255	3.76733	7.47108	8.19295	7.40143
TCGA-HT-7884	345	0	264.138	5.43932	11.2235	17.8227	12.6471	3.00741	0.597447	5.93126	0.0487868	0.136186	0.303914	1.8184	0.175594	7.2745	35.1053	16.1691	3.94496	0.0558915	10.2682	7.42023	6.12126	2.77959	13.0957	6.21448	23.3205	66.2425	9.83974	0.947382	11.3234	2.41682	0.0441056	12.7679	2.02984	25.9497	6.6208	5.6242	2.66736	34.7503	0.99648	0.0812684	0.0195109	0.69091	0.0927338	3.88505	6.99754	7.9527	7.35228
TCGA-DU-A7TB	1569	0	199.784	2.89378	8.87474	13.8217	10.682	5.24156	0.349887	3.88251	0.00734461	0.105791	0.00959009	2.97939	0.106756	11.9286	38.8292	19.9421	1.96495	3.47266	19.0988	7.75414	4.49814	1.13633	16.2854	4.3543	29.2269	230.858	4.65124	0.769872	7.83504	2.34958	0.0833004	19.7309	2.16321	23.8304	9.35407	4.38207	2.91532	38.3785	0.42998	0.107288	0.625638	0.331851	0.09573	2.81219	9.57629	5.22002	10.2144
TCGA-HT-7485	124	0	132.809	4.24031	14.1641	18.7092	23.9663	4.37041	0.453709	14.7837	0.254735	0.0476841	0.0110057	0.447616	0.0140016	8.02284	34.7092	16.4518	3.94385	0.205999	20.4903	9.70963	5.67843	2.4349	10.4263	7.22422	11.5857	58.5527	5.0512	0.0875959	10.8568	3.13144	0.0406399	14.3523	2.82192	30.8137	15.2546	7.04772	4.11359	58.4096	0.274869	0.0748825	0.00898888	0.171786	0.0122067	2.5529	9.01947	4.25913	10.247
TCGA-HT-A5R7	617	0	221.034	3.80807	21.2426	18.7161	11.1484	2.53134	0.475459	5.0143	0.032714	0.0365278	0.0124587	0.463903	0.104159	10.5663	33.5962	21.5899	3.11615	0.348011	11.3522	3.28692	8.88264	1.01794	12.3724	8.21226	29.1974	60.1127	8.31743	1.32329	19.8883	3.79587	0.978666	83.6495	2.65059	23.9606	8.981	8.38757	3.36544	33.835	0.595839	0.285049	0.0392491	3.71367	0.444162	4.02407	5.06062	14.1278	7.48439
TCGA-FG-6690	145	0	288.582	6.36841	10.7245	20.7416	11.9952	3.06322	0.376025	20.9216	0.232852	0.0509995	0.0555461	0.593355	0.0241755	7.95315	42.9141	16.9746	5.86275	0.0307802	13.7494	7.03914	7.17544	2.20615	14.3499	7.00257	14.4014	17.2074	3.95343	0.238301	8.20076	6.1307	0.0176651	9.94362	3.96154	27.9253	8.62303	6.611	3.52175	62.3732	0.615186	0.0619693	0.00537245	4.25186	0.0826843	2.528	6.95687	7.05985	6.44009
TCGA-FG-8182	418	0	263.713	6.35869	12.8996	28.2847	12.0816	2.29441	0.393953	22.5632	0.162636	0.128025	0.0451262	1.0227	0.0928698	7.64668	45.0847	17.2101	6.32904	0.111792	12.6783	7.36177	10.3876	2.24213	14.4105	9.45551	17.5814	68.2623	5.10133	0.2885	22.5541	9.06504	0.0641589	15.1803	4.98154	28.8172	12.0482	6.97306	3.03791	52.5673	0.939434	0.106283	0.0195125	2.99967	0.0750764	3.06495	7.741	9.64704	8.14904
TCGA-HT-7881	91	0	180.096	3.91544	17.775	19.9378	15.4446	2.35979	0.347046	1.91251	0.0296423	0.101776	0.0508002	0.606399	0.0276981	8.95134	21.8313	18.3816	2.74155	0.265609	8.5638	5.53625	11.6813	1.31628	8.82299	6.63986	23.825	195.193	9.77553	0.997873	42.614	2.17086	0.628538	68.4454	1.14812	21.9804	4.11501	6.76805	3.24988	36.7385	0.381781	0.279175	0.0577912	0.389804	0.132811	3.42187	5.87069	11.7332	8.47128
TCGA-DB-5277	1549	1	915.273	5.47204	14.9718	33.5284	15.9236	1.73398	0.411881	8.02686	0.127528	0.330356	0.00555057	0.407141	0.0423692	8.13977	71.0586	15.2237	2.75972	0.68458	22.7687	77.1929	5.67777	4.1372	30.0038	9.75266	17.239	42.9104	3.05305	1.14482	21.7205	4.00674	0.0670786	17.8693	1.00069	26.8144	9.10268	12.6703	3.31178	65.3615	0.988822	0.287603	0.0357008	0.114668	0.30012	2.35593	6.97189	6.34143	7.15625
TCGA-VM-A8CH	716	0	363.483	5.26224	2.98068	28.4101	15.7355	3.28724	0.825757	12.3449	0.0106531	0.174856	0.0173875	0.787526	0.0353932	11.4193	44.6366	22.6077	5.04139	0.0679962	15.8967	10.0975	8.23006	1.82776	15.8763	6.84304	20.3925	33.3529	18.4631	0.0472436	5.10877	5.52326	0.0577853	9.16269	3.41758	22.4014	16.1908	6.12489	2.40119	52.1253	0.65693	0.106474	0.0702964	7.76605	0.0752117	3.56041	8.20041	8.17474	9.20192
TCGA-P5-A72Z	356	0	645.175	4.42304	19.7349	28.7305	6.95413	0.995068	0.271536	0.696945	0	0.327937	0.0170766	0.437797	0.0155179	13.0468	25.7203	24.6368	3.83982	0.0256846	5.80647	38.4029	8.5948	2.85829	8.78096	3.97914	19.2195	3.74159	4.37281	0.0723096	1.51004	10.5384	0.0331666	15.934	0.36003	56.4361	2.22719	4.45882	2.33579	56.4696	2.16422	0.195351	0.0313814	0.105835	0.125817	3.37154	4.68011	9.66208	7.62393
TCGA-FG-8191	474	0	283.225	4.23064	7.79595	20.3964	15.9515	2.35987	0.687095	11.1432	0.0386801	0.17103	0.00757586	0.629432	0.0594353	7.95596	37.9158	22.3515	6.89553	0.307659	13.1473	6.14058	9.56927	1.54459	14.4583	5.98388	16.223	80.9286	11.0581	0.212081	11.6501	7.19206	0.0534067	14.6304	2.52412	20.4592	22.05	7.05327	2.9294	51.2481	0.464971	0.0535288	0.0742512	5.03958	0.365514	3.07355	8.3177	5.04555	8.45812
TCGA-FG-7641	315	0	217.461	5.88033	12.5442	26.7255	15.4392	1.64506	0.56799	2.12903	0.0390806	0.13091	0.0877056	1.02433	0.109552	7.79414	22.0762	22.5759	6.01424	0.268631	7.54785	9.40255	10.8912	1.50738	8.39461	8.19118	18.2397	75.4863	6.17719	0.791723	58.1328	0.987952	0.650407	50.7079	0.775561	23.526	5.35888	7.12631	3.31795	46.9346	0.686375	0.503273	0.0293047	0.428267	0.175099	2.90665	6.8025	9.42463	8.58292
TCGA-DU-A7TI	1185	1	357.716	5.17062	12.9974	20.9578	12.1375	2.92072	0.490441	13.5762	0.0289241	0.058133	0.0267517	0.61412	0.038038	9.20422	41.9509	21.3312	4.15887	0.142013	13.849	13.2502	10.6402	4.01254	13.3641	10.1	17.9886	27.1283	15.1995	0.524746	15.2017	4.27197	0.185419	25.6492	4.70288	24.5246	22.8557	5.88688	3.0714	40.3214	0.970838	0.244614	0.0867554	0.201558	0.178027	2.76871	6.81707	10.4675	7.02649
TCGA-HT-8110	421	0	212.733	4.72702	16.3931	18.5887	14.2099	3.13697	0.477628	47.8	0.210685	0.0732883	0.0145484	0.27126	0.0084131	11.1398	50.1427	10.7698	2.82023	0.131293	18.5731	11.561	6.59296	2.59497	15.4014	7.2605	18.0106	28.1171	14.2706	0.806926	13.1235	15.1812	0.0679297	13.004	10.4782	21.3468	68.4442	8.12484	4.21306	42.213	0.474394	0.05607	0.0291661	6.51383	0.140824	3.35168	8.17159	5.95061	10.0565
TCGA-HT-A5R5	6	0	225.621	2.60153	10.2086	18.4641	12.7368	4.88734	0.199895	10.6197	0.13993	0.0216336	0.0140547	0.217696	0.00894031	9.87282	29.3829	20.277	3.11327	0.0739881	12.2086	6.90776	5.86241	2.54919	9.91535	4.4399	20.9602	20.9199	5.8635	0.47301	18.071	11.1812	0.233545	25.9695	5.52735	24.6681	37.3153	5.44907	3.10299	37.1915	0.403298	0.190337	0.00645704	1.93811	0.163679	2.87151	6.49646	7.61838	6.4274
TCGA-S9-A6WP	463	0	581.411	4.22739	14.4486	29.6911	10.0747	1.93517	0.561001	9.36205	0	0.143432	0.0276912	0.95596	0.0352292	11.7514	35.5199	29.1257	3.18693	0.150733	8.87341	20.542	7.04384	1.65148	8.96248	5.68212	25.1287	64.487	3.1543	0.651425	33.2204	3.31729	0.107565	16.8717	1.09245	35.7143	14.6041	6.40613	2.69695	58.402	1.07838	0.453429	0.0145394	4.46758	0.153566	3.22082	7.69949	8.1988	9.19219
TCGA-P5-A781	136	0	296.439	3.81134	15.2738	21.0509	16.874	1.81675	0.606731	5.53099	0.0768509	0.0686481	0.0292678	0.404949	0.0106386	7.82744	22.5688	22.6115	3.11639	0.0545025	10.525	14.2957	6.37938	2.19203	7.91683	7.71061	20.465	89.512	4.65595	0.568024	46.829	1.53852	0.0968467	23.5366	1.9213	26.1712	8.92494	7.33988	2.6985	42.2258	0.526564	0.256035	0.0307343	0.0518261	0.092748	3.24165	6.64692	6.16974	10.0551
TCGA-FG-8185	435	0	310.453	4.95562	17.2478	36.072	14.0006	2.36355	0.74467	4.85956	0.0133662	0.0156707	0.0610843	0.56396	0.0319177	5.88336	45.0265	24.6725	3.14527	0.10172	14.4126	21.6353	4.99287	4.25436	8.08568	7.28694	19.3073	18.2564	6.88141	0.207465	2.46911	3.69842	0.0494333	9.81856	1.67934	29.0536	7.77391	7.08755	2.04866	39.0035	0.99639	0.0616577	0.0160363	0.243373	0.0399244	4.80885	7.68056	8.02347	9.20959
TCGA-E1-5307	1764	1	481.482	6.62764	16.0471	31.2584	16.4158	0.992112	0.465953	16.9756	0.0689049	0.0577034	0.00702901	0.578658	0.0393467	8.70152	41.7463	23.1313	6.93726	0.148011	17.4588	10.8808	9.16001	2.62424	18.604	8.56517	13.1009	21.2575	6.13026	0.40975	5.91125	8.75704	0.165644	27.2962	2.43308	28.1146	13.5146	6.48704	3.80512	65.8288	0.820235	0.245013	0.124005	4.17047	0.187106	2.23217	10.4434	7.67509	8.4587
TCGA-DU-7013	271	1	387.755	6.73147	11.7132	21.0288	12.6864	1.63407	0.38099	18.5036	0.0454798	0.50274	0.0120625	0.256386	0.00590234	7.45537	48.3527	9.42002	5.62858	0.0223298	14.2212	14.7114	4.76292	2.70993	20.9813	6.8727	12.1409	11.9205	19.8203	0.850313	14.1182	6.29909	0.0532639	11.7476	5.06987	23.6218	12.6562	8.61917	3.91776	34.4249	0.616824	0.161718	0.0136413	2.18526	0.0555737	2.00667	6.61643	4.70269	9.69198
TCGA-DU-6399	2002	1	427.769	6.51986	14.2432	29.5127	13.839	2.818	0.590613	30.6386	0.0461981	0.0722174	0.0276477	0.721342	0.0223834	9.55489	55.0932	19.7271	5.17743	0.0529258	16.4762	13.2341	7.15183	2.73193	18.6418	6.56514	18.2075	28.7397	4.35979	0.161418	17.4889	7.96047	0.0227811	11.1499	4.544	29.9364	18.2593	6.4832	3.58314	63.4422	0.78734	0.100635	0.0277134	0.643864	0.0669053	2.73039	7.47325	6.85287	7.49474
TCGA-HT-7611	1754	0	322.515	7.03103	13.0627	26.8499	15.8627	2.81047	0.507532	29.2408	0.0500002	0.0287122	0.0174875	6.86116	0.582897	8.52181	46.108	18.8836	4.5659	0.220943	17.6101	15.4826	7.38725	3.22276	16.2315	6.33209	13.6103	28.4171	8.52178	0.0633538	10.7307	4.51756	0.0140891	7.62985	2.80766	32.0259	17.1815	7.3796	3.24312	60.2597	0.853067	0.142783	0.0171396	0.202313	0.0155168	2.99136	7.59889	3.62536	8.94098
TCGA-DB-A4XA	575	0	411.887	2.56458	13.7526	26.2792	10.5467	3.05871	0.484869	6.54842	0.096081	0.1046	0.0196025	0.477427	0.0324203	11.783	34.9266	25.1927	2.35839	0.212284	9.77444	16.842	6.48767	1.92045	7.71736	6.29406	27.5936	78.7796	5.11514	0.363149	28.2101	3.17967	0.12437	21.2466	1.70292	35.8317	15.0105	5.88146	2.69041	44.8286	0.515618	0.258543	0.064842	0.494057	0.0847928	3.75594	7.88166	8.00727	8.7528
TCGA-HT-A5R9	4	0	749.635	8.54691	11.7901	35.2466	7.82054	0.890676	0.680539	1.72526	0.0101547	0.0340157	0.0232039	0.788457	0.0231946	7.1002	38.4657	30.088	4.79454	1.20656	7.94982	20.2723	12.7034	2.98861	11.1906	6.02882	21.7985	11.1681	7.5456	2.69793	28.2291	0.846365	0.0851271	19.5811	0.611516	36.0577	3.38845	7.68484	1.87804	54.1504	0.665833	0.702649	0.00609164	0.0136961	0.198536	3.07905	9.02995	10.0409	5.52755
TCGA-DB-A4XC	1423	0	244.791	5.49869	11.4515	23.8723	10.0551	3.10161	0.55057	12.7223	0.074117	0.099309	0.0435496	0.830479	0.0369364	8.49567	36.7396	17.6884	5.48393	0.160117	13.2741	3.85289	8.3754	3.01733	13.3828	7.14245	19.1837	30.7854	3.2315	0.980095	15.0123	7.35841	0.2266	20.2795	4.34159	25.199	13.7314	6.70781	3.40629	54.2534	0.879386	0.284915	0	6.50772	0.22541	3.93837	6.47857	13.7541	7.31102
TCGA-E1-5318	2381	1	697.062	6.60914	18.724	34.4892	6.06754	0.500166	0.341934	3.91408	0	0.870604	0.00542112	0.395715	0.00344843	8.5351	34.6379	34.3797	11.1166	0.244615	7.50307	20.5703	10.3216	1.82657	12.4206	6.87804	17.5047	6.41019	7.68788	0.0803439	1.00737	2.13221	0.0245678	14.3538	1.02281	41.4904	5.96453	7.05174	2.31889	79.7248	0.648162	0.229824	0.00498117	1.37193	0.0270573	2.83615	9.01772	4.52648	7.74684
TCGA-DU-6402	216	1	434.635	3.18039	21.9156	24.8389	12.1348	3.67181	0.330174	13.3477	0	1.15589	0.00585458	0.170108	0.00595864	22.9397	56.918	13.3435	2.60422	0.0493125	16.9353	38.2237	4.485	4.55136	13.5035	3.50685	25.3874	12.0752	20.892	0.511931	6.99042	9.67682	0.0459892	14.601	6.44491	37.5094	14.6371	7.22275	3.96044	21.5197	0.358393	0.0110311	0	2.21094	0.0428571	1.6212	5.27027	5.25666	4.47558
TCGA-WY-A85D	1149	0	303.436	1.92986	15.8213	18.274	14.4476	5.51778	1.21162	14.9223	0.140342	0.0904056	0.0123341	0.368914	0.0493166	10.942	40.2316	25.8966	1.98403	0.291524	18.2806	16.0741	3.70788	2.37941	10.6432	5.17753	35.4091	35.5904	4.95561	0.200207	15.5071	9.34841	0.0159704	6.29323	2.83092	34.7812	29.4691	6.9039	3.26687	33.5397	0.589876	0.182598	0.0194282	1.90742	0.0644919	4.90857	7.95703	9.40542	10.6633
TCGA-DU-7309	86	0	229.514	5.49001	16.8012	30.5115	10.9451	3.36983	0.41087	11.759	0.0339239	0.0522726	0.0210404	0.615126	0.0408563	9.99961	43.1191	20.946	4.21333	0.433058	13.3674	11.0773	10.859	1.74758	12.8985	7.41868	19.8103	11.3667	8.65139	0.837016	13.8407	3.85448	0.344607	55.681	2.41804	24.25	10.5997	6.24908	3.1715	51.4815	0.481943	0.412089	0.0244204	0.0503302	0.235822	3.02958	7.94045	9.35472	6.02154
TCGA-DH-A66F	525	0	268.698	4.14184	8.1249	24.114	16.9552	2.47005	0.711779	3.07088	0.0500871	0.151001	0.0147151	0.498348	0.0603225	8.91794	20.69	23.9794	4.35368	0.0491839	8.07139	15.9913	7.02791	1.71437	7.80704	6.75129	19.8156	85.856	5.22347	0.444247	58.3928	1.6637	0.083976	14.3965	0.817126	30.6099	7.40823	7.13073	2.4455	51.1213	0.766302	0.315767	0.0240371	0.905233	0.070724	3.56862	7.91147	7.03899	9.59011
TCGA-DU-A5TP	1014	0	483.557	5.99874	14.5468	30.8114	8.02484	0.93973	0.676274	34.114	0	0.0727379	0.00843849	1.42304	0.150298	9.26796	47.1772	25.5215	4.51418	0.0304613	11.1765	20.6749	9.94024	4.78155	28.0486	8.47541	24.5428	19.4433	11.8384	0.491914	21.8717	15.3672	0.0917812	22.3169	20.0449	26.83	55.6798	9.12321	2.78009	36.8305	0.992782	0.103348	0.10545	0.0139463	0.123544	4.06886	3.8205	8.43426	11.4056
TCGA-HT-8105	192	0	377.176	8.248	13.2941	29.9096	11.1568	1.43554	0.764216	4.43467	0.0156442	0.165073	0.0804319	0.729175	0.034109	8.71632	34.3473	32.7252	6.23397	0.14594	9.09898	12.9616	13.9285	2.72804	10.372	8.052	20.5992	13.5204	6.89783	1.24565	29.7956	1.28472	0.401151	42.9762	1.51163	26.2334	13.3029	8.36417	2.97285	58.2757	0.824282	2.0868	0.0703852	0.722677	0.37383	3.23539	11.5033	10.342	7.13298
TCGA-DU-6407	2877	1	951.349	3.12313	18.5238	28.769	13.1049	2.64052	1.34974	20.0755	0.0105135	0.292305	0.0463313	0.432598	0.0371126	12.5084	58.4486	23.6329	1.91623	0.0464576	13.866	38.23	4.47108	1.68568	16.8072	4.26608	33.8124	20.2955	5.59647	1.34364	3.61204	10.876	0.0622127	17.2705	3.14834	34.9057	11.8903	6.72352	2.41834	34.4845	0.410332	0.210159	0.0315343	1.41091	0.0856459	4.63165	7.82871	5.3615	11.8356
TCGA-CS-6668	246	0	296.013	8.63767	10.9941	28.8977	8.64195	0.531316	0.483184	2.17994	0.0491852	0.197709	0.0173936	0.699379	0.0221285	6.9548	30.7302	21.6303	9.41644	0.603728	5.97215	25.075	7.56207	2.83418	10.535	8.00289	11.6742	25.2625	3.85852	0.773348	40.3148	1.45188	0.092974	11.8363	0.282729	32.5618	16.8438	7.84247	4.65435	73.7656	0.927831	2.36343	0.0196702	0.64127	0.102395	1.85919	8.64331	7.79322	6.86448
TCGA-HT-7483	5257	0	200.378	5.70526	20.2413	36.3119	12.7003	3.66194	0.564913	13.1407	0	0.165431	0.0147779	0.445836	0.0410197	7.87144	64.0182	29.0911	4.42743	0.0767849	19.0866	18.6184	13.5746	2.15567	20.4648	9.89548	14.079	8.34405	12.9378	0.288703	16.0274	2.15394	0.105531	23.5406	1.91961	27.1267	12.6286	6.71802	2.64685	61.141	0.52685	0.177191	0	0.0055508	0.259269	2.52039	10.018	5.70644	8.87285
TCGA-HT-7694	212	0	174.501	4.21317	20.1806	22.9394	12.169	1.48575	0.38239	1.57151	0.0517985	0.0743621	0.020532	0.485101	0.0261212	10.9671	28.5039	20.8296	3.84704	0.45778	10.2889	5.1558	11.2662	1.23441	7.74708	9.18376	20.2776	71.0691	8.59454	1.4827	24.1193	1.43304	1.24795	91.1921	0.89528	23.0493	5.17083	8.08843	4.07824	40.2672	0.58339	0.386862	0.022195	1.87133	0.554583	3.21163	5.99215	11.6684	7.93474
TCGA-HT-A614	84	0	429.375	4.2965	14.1085	25.9398	17.2444	3.23051	0.74413	7.48743	0.056195	0.207063	0.0495285	1.02679	0.102685	7.64177	40.9634	22.3655	2.13869	0.143472	15.9973	16.6003	5.10518	3.25915	15.0885	6.90513	17.5777	91.894	3.35798	0.339833	11.9711	4.112	0.0665058	16.0291	2.88568	32.1947	12.4818	7.55906	2.70474	45.1687	1.02644	0.0432042	0.00674208	0.234958	0.115971	3.74096	5.3464	6.32273	10.2226
TCGA-IK-7675	580	1	321.144	7.4658	18.9183	26.2325	12.8235	2.51822	0.597975	5.80205	0.0302281	0.0227826	0.0678386	0.535813	0.0533525	12.0863	52.2462	22.2383	3.5172	0.0482348	25.4205	19.9832	7.57499	3.52065	21.7268	8.70686	6.75021	20.9608	6.64254	0.0426535	3.39599	3.89954	0.059624	7.49926	1.53487	30.9367	19.5315	10.4386	3.06252	59.3953	1.72837	0.139441	0.0271999	0.591164	0.0246246	2.79077	5.22891	4.96126	10.4063
TCGA-DB-A64S	837	0	326.223	4.57609	16.0825	29.1578	17.8314	4.2225	0.851668	25.4188	0	0.0772898	0.0304863	0.870984	0.0889779	9.83584	51.7635	22.079	2.39595	0.0863136	18.1893	15.0372	6.89697	1.63345	15.5777	5.97314	17.8981	45.9463	8.18135	0.150608	8.45919	7.15774	0.0650166	9.78341	5.44963	27.3159	32.8939	6.8733	3.19282	52.6718	0.566049	0.0422367	0.0461377	0.50385	0.0835388	4.05458	7.45099	7.42563	11.0767
TCGA-FG-A6J3	679	0	652.899	1.62567	17.839	25.259	7.6403	2.33318	0.653762	16.4113	0	0.956808	0.0403801	0.35815	0.0140106	14.3699	49.9295	17.7323	1.66168	0.0496924	13.872	25.2037	1.9867	0.374218	11.1281	2.84605	67.4287	94.3095	3.61032	0.104276	1.7747	6.89867	0.00554537	11.0175	2.9797	42.239	53.5749	5.43152	4.90829	27.1575	0.210673	0	0	2.66946	0.0183219	7.1193	4.16715	4.32827	8.89827
TCGA-DU-6397	1403	1	981.709	6.26508	13.3801	37.3539	10.0441	2.42285	0.654388	2.80134	0	1.89322	0.0104431	0.498281	0.00885728	11.3722	35.3579	37.4353	3.34814	0.115187	12.5541	34.2347	10.6078	2.41491	11.4678	5.84799	23.0089	8.76364	6.60972	0.477215	7.44046	1.39855	0.110429	20.6078	0.607149	41.2469	28.5301	7.81675	2.35186	54.6446	1.91452	0.155774	0.0127941	0.337997	0.104245	3.95261	5.35528	9.8288	7.96409
TCGA-TQ-A7RF	652	0	512.781	4.40605	19.5031	23.1972	16.7417	2.91338	1.20792	9.50165	0	0.0429533	0.0645312	2.81199	0.0865355	16.8844	40.2196	32.356	9.37174	0.0577117	18.1183	9.60734	5.45591	1.39465	10.3387	5.96755	23.8799	2.00497	4.9633	0.215402	5.85432	4.034	0.110656	16.8423	2.43942	42.2481	18.4633	4.56498	2.81121	42.699	0.859131	0.238248	0	0.814296	0.26695	3.74568	8.49705	9.84894	8.1268
TCGA-QH-A6CX	374	1	241.366	2.5171	12.1156	19.7877	13.568	11.0601	0.413977	9.57711	0.0307625	0.103046	0.0401675	0.841469	0.0468434	16.9533	34.7124	10.6584	1.46402	0.00503462	16.7083	15.3159	5.51954	2.86277	6.67845	3.25469	29.9516	82.4016	11.0708	0.15296	4.52859	5.66207	0.0657346	14.9009	3.99693	23.4944	24.4825	2.97691	2.80909	23.5724	0.760399	0.0157673	0.0738155	1.54207	0.00556888	3.25141	5.49873	5.93656	7.44223
TCGA-TM-A84L	1244	1	275.415	3.79558	14.1738	21.2685	15.3699	4.93958	0.753126	20.4547	0.0953938	0.0390554	0.0328697	3.21552	0.349946	10.9357	35.173	18.6885	2.53672	0.0364286	15.6576	7.44006	6.22491	1.8506	11.9189	5.35315	25.9516	44.8417	6.55873	0.243573	16.4657	5.40445	0.036587	12.4113	6.80648	28.1812	20.2849	6.14874	3.05312	43.2239	0.645343	0.138533	0.0381501	0.550387	0.034538	4.21981	6.51176	9.17472	8.79777
TCGA-E1-A7Z2	400	1	197.116	3.66539	24.7049	19.8154	13.0077	4.23901	0.408323	3.1222	0.034285	0.114846	0.0139897	0.296889	0.0160182	12.7694	28.4136	14.1778	2.47539	0.244084	13.7744	14.8211	3.42957	2.08919	11.2513	5.33561	29.4824	26.4673	7.98454	0.739494	6.84547	1.80698	0.262052	34.218	1.57194	29.4765	4.13365	4.131	3.98676	18.7598	0.294385	0.375619	0.020567	0.653165	0.274641	4.66641	7.84428	11.6338	7.64142
TCGA-HT-7472	3	0	229.806	6.02376	12.2878	25.2614	13.4725	2.13269	0.569835	41.0365	0	0.0646998	0.109125	0.564715	0.0385642	9.08377	52.2395	20.0204	5.2419	0.459574	17.5569	15.6976	10.5797	2.76103	17.0006	7.39783	13.9259	41.2918	5.76241	0.0898496	35.939	6.13704	0.040296	10.1569	4.16452	29.3147	13.763	5.99416	3.33858	62.9358	0.690055	0.188478	0.0267384	0.385753	0.0645515	2.31918	7.27257	5.12433	7.24844
TCGA-DB-A4X9	1414	0	237.931	4.09688	11.9945	22.6354	13.6647	3.53638	0.537094	10.4073	0.751414	0.0536418	0.0140738	0.658629	0.0562727	10.6136	42.709	19.1034	2.59531	0.0302403	15.271	12.8006	6.21495	2.10814	13.2752	6.33842	23.1459	17.1305	4.34062	0.735	6.67589	4.85413	0.157933	13.0128	1.71289	33.3602	16.1801	6.65595	2.53447	43.4751	0.60577	0.0662941	0.0221685	0.57319	0.153867	3.9863	7.5778	8.03086	8.05945
TCGA-TQ-A7RR	789	0	497.97	4.3409	11.9866	15.9656	14.3192	3.48556	0.429386	13.7708	0.0664739	0.133602	0.0325489	1.27598	0.0907061	11.0942	40.038	21.8265	3.11754	0.1492	14.3293	20.692	5.85218	2.07662	12.3653	5.84769	14.3814	132.26	4.31001	0.413479	12.115	6.66361	0.187311	22.9753	4.71528	33.2144	12.4169	5.95526	3.2008	47.2638	1.22308	0.0584078	0.0341799	0.365029	0.0257864	3.39588	6.07793	6.84102	8.68503
TCGA-DU-5847	550	0	212.235	5.29415	19.5821	23.9281	16.7391	6.60122	0.73726	38.4149	0.0144935	0.296152	0.00591395	0.567724	0.150477	9.69502	54.327	9.55816	3.35079	0.0853929	17.4545	32.8666	6.12445	3.26963	17.665	6.78692	31.2958	20.5322	22.8188	10.2606	19.8896	9.76162	0.107205	11.5013	9.28735	29.6312	26.3531	5.34565	3.06579	25.7285	0.718398	0.0445719	0.021736	0.459379	0.0118068	3.00332	4.52065	6.40696	10.5457
TCGA-HT-7609	1401	0	567.624	4.80819	13.6407	28.1888	16.8608	2.50104	0.736997	20.6003	0.0323102	0.0568212	0.00527356	0.972688	0.0972823	6.97754	53.8153	20.8411	4.63231	0.0396595	13.7834	8.80874	6.84716	2.69146	18.4742	6.42201	14.7061	12.4406	6.03978	0.162827	12.7064	8.366	0.0557646	8.94806	5.22691	23.9938	15.9731	6.3716	2.95416	55.1727	0.83859	0.161466	0.0387647	0.266917	0.0965097	2.80727	6.77459	7.35179	7.28495
TCGA-E1-A7YI	113	1	224.008	7.78869	16.2117	39.3958	8.58296	0.609874	0.778962	4.93517	0.00861373	0.418379	0.00562361	0.570689	0.00894308	18.4191	84.7261	25.4724	5.44442	0.0169168	13.885	21.9776	5.87039	2.34523	33.1147	15.2286	15.4831	13.5231	7.13873	1.19461	28.8593	11.6927	0.0254855	17.4441	1.88625	32.1526	8.20588	8.2006	2.03711	33.4278	0.47066	0.0132449	0.00516723	5.11761	0.0421019	4.36159	6.16729	10.1818	8.68381
TCGA-DB-A4XB	921	0	429.923	7.56353	12.8348	25.6511	13.9422	2.53887	0.475749	11.0582	0.219241	0.18819	0.0603851	1.21364	0.0739778	7.83067	45.2917	20.1021	4.53709	0.242199	12.2805	19.2936	9.0332	3.38137	17.5972	8.43406	21.1893	28.4282	4.50912	0.878367	17.0902	3.56896	0.35812	30.1623	3.52571	44.8762	11.5413	8.28166	3.55421	47.0369	1.18725	0.168558	0.0328798	0.0277219	0.200925	3.23814	7.23683	12.0963	6.88642
TCGA-DU-5854	259	0	246.993	3.95227	10.0175	20.8836	15.4111	3.89464	0.490365	22.0312	0	0.303758	0.0828292	0.698169	0.0449147	13.7957	33.6154	12.1867	2.83767	0.102117	14.4353	17.2773	5.97961	1.89476	12.3679	4.45758	15.4304	253.725	42.7062	0.214658	24.9385	4.38469	0.028717	14.6403	5.20119	27.2777	15.4765	6.17985	3.4734	44.9713	0.616924	0.0191884	0.00499064	0.993032	0.0135544	2.44562	7.06509	5.12011	8.36202
TCGA-FG-A4MW	561	1	309.041	2.33919	12.1997	22.0335	9.92872	3.39442	0.58139	6.41518	0.0612806	0.246329	0.035007	0.49148	0.0636236	11.0155	51.1657	12.9916	2.8887	0.105307	15.316	15.5306	4.88641	1.27783	12.9523	5.75377	32.6674	66.0702	10.3248	0.555881	12.4385	5.52066	0.0755463	18.9974	1.92064	36.6987	9.82088	5.72177	2.75189	23.6986	0.597931	0.0471141	0	1.79768	0.124802	3.33293	9.09734	8.30615	8.1908
TCGA-HW-7490	587	0	341.225	4.24934	17.347	33.135	17.0598	2.81534	0.94544	7.66242	0.00887061	0.056457	0.00868697	0.598019	0.0534167	10.3535	51.5748	25.9244	4.33838	0.0479085	18.3951	13.9075	7.6973	1.91297	16.4282	6.72259	19.677	8.06608	9.36809	0.214576	5.93423	2.93561	0.0918593	15.9691	1.67055	28.7576	34.8568	7.48745	2.53466	60.9047	0.436226	0.0545596	0.015964	0.161517	0.0481749	3.30964	8.21174	5.99507	9.6838
TCGA-S9-A6WL	948	0	330.637	6.60296	18.6674	30.2596	10.34	2.15298	0.408534	6.11547	0.030358	0.216941	0.0528524	0.50577	0.0189112	12.7358	34.047	28.9964	4.22451	0.12421	10.1589	14.3165	16.3828	2.06855	8.03973	6.45774	23.8289	10.6563	5.54122	2.1296	29.3583	1.27753	0.364271	45.5299	1.17445	28.7456	5.48167	6.74326	2.92889	61.611	0.805693	0.731319	0.0242816	0.156956	0.560556	3.1206	9.38138	9.34319	6.70191
TCGA-HT-7689	457	0	368.889	4.92192	17.3469	20.2655	18.3224	3.16127	0.608037	15.498	0.0310536	0.158633	0.00506845	0.958318	0.0660938	12.7284	46.7087	20.1147	5.68183	0.0686106	17.6128	11.9339	8.49357	2.58343	14.9407	6.9842	15.5365	109.943	6.19079	0.134585	28.6887	4.27722	0.0842219	14.1786	3.58708	30.281	15.0685	4.48355	3.3705	53.8585	0.442377	0.119374	0.0791711	0.141356	0.0716751	2.76987	6.93077	6.23862	9.65283
TCGA-HT-8015	5	0	173.832	3.54648	16.5074	20.4967	12.2534	2.65725	0.295602	10.0745	0.0192685	0.0839077	0.023587	0.438972	0.0100026	14.9577	30.6704	20.6126	2.70085	0.108796	10.9511	5.62803	13.3771	0.915997	10.9	9.79884	33.3297	52.9394	10.3941	1.63522	20.2408	2.468	0.541593	81.8252	4.62556	18.2085	8.84268	7.44523	3.32303	36.356	0.285772	0.496272	0.0404559	0.123444	0.303468	2.99197	6.72089	11.6906	6.39996
TCGA-S9-A6TU	2652	0	635.396	3.68058	7.82151	24.7354	11.9394	2.96039	0.493658	14.3552	0	0.0682666	0.0269272	3.5081	0.368769	15.457	46.2949	16.2558	2.85113	0.157239	13.9827	19.0062	5.32259	1.6147	9.71465	3.47649	26.7538	49.2887	2.54023	0.2191	8.63511	9.48615	0.13878	10.914	5.31282	31.7248	22.5113	4.2812	2.53515	40.2555	0.999931	0.253679	0.0349298	1.75393	0.115949	4.19613	6.42375	10.794	7.3774
TCGA-HT-7602	910	0	212.908	2.93767	9.61108	15.0533	21.1077	4.75261	0.565588	8.90803	0.127359	0.15465	0.0961403	0.51257	0.0280986	6.29308	28.7216	15.915	2.30747	0.203227	14.4301	6.29768	4.78125	1.51706	11.9979	5.76087	20.7693	195.223	6.27952	0.0898555	67.0261	3.12206	0.0235511	15.5099	3.75198	25.1528	13.3751	5.07816	2.40326	40.8089	0.316883	0.122396	0.00955007	0.0268398	0.0216146	2.74259	6.98146	3.54653	9.77487
TCGA-CS-5396	305	0	226.822	4.65036	15.1874	25.4505	8.91362	4.94895	0.254281	5.6288	0.0128541	0.43273	0.00839197	0.877024	0.0934187	13.0674	21.978	24.6185	8.96966	1.7324	7.25019	9.9797	12.4816	2.69979	10.4632	6.80283	25.1225	54.7545	3.78061	0.274658	29.3144	1.62277	0.107756	19.0471	1.37925	31.2414	22.1989	6.47069	2.87946	85.9929	0.576934	0.0840014	0.0424101	8.39103	0.0104713	2.60942	10.8588	5.88233	8.09431
TCGA-HT-8010	52	0	178.186	3.6792	13.9792	16.7162	14.9436	4.24232	0.33532	9.0715	0.138431	0.0463706	0.0159488	0.456208	0.0185995	8.06516	16.2804	17.2749	3.32524	0.327841	8.03867	5.69051	5.59622	1.32672	5.69215	6.19392	21.0854	82.8	7.57924	1.02099	34.0678	2.80459	0.417606	35.794	2.51871	20.5053	5.17851	5.06872	2.57335	33.9693	0.5085	0.325547	0.0439634	0.307518	0.163626	2.71264	5.18316	8.32708	6.98477
TCGA-DU-A5TS	966	0	822.73	3.07256	15.1917	23.1026	15.513	2.23244	1.15163	9.45923	0.0124024	0.0747808	0.0303642	0.749625	0.0463559	8.07093	43.7352	21.5632	1.33747	0.10352	12.0149	1.91745	3.60443	1.29175	10.4229	5.1366	20.4355	83.0443	4.39597	0.220007	4.40261	4.62887	0.0489269	18.0331	2.63442	30.6522	15.9326	5.55463	2.43423	33.9064	0.503417	0.00953531	0.01488	0.526923	0.0336779	4.87358	5.20595	7.91264	8.63256
TCGA-DU-7010	458	1	292.527	7.14998	16.0995	20.7585	14.4702	0.9658	0.773435	11.7962	0.00694125	0.186011	0.0169939	0.464723	0.0446812	6.34755	85.6941	16.5005	3.50623	0.0783849	25.0064	26.0974	5.11282	2.00386	33.5921	10.3908	13.6312	61.8246	8.57056	0.260254	23.6791	2.21629	0.0444971	13.0923	2.31801	25.2012	8.48674	11.2768	2.04114	51.9321	0.493057	0.026683	0	0.149792	0.0565454	2.79932	11.2173	7.34226	8.9646
TCGA-DU-A6S7	640	0	470.399	4.90766	11.1428	24.9334	13.0455	3.33213	0.370325	20.1644	0.0382203	0.0352077	0.017155	1.20392	0.0912679	10.579	50.8772	18.2346	2.60402	0.154816	13.1705	27.8643	4.44977	2.32486	14.2225	4.88188	19.0589	36.9272	3.73061	0.130975	4.76536	8.08099	0.0612531	8.00904	3.23796	31.4954	15.9012	4.71375	3.26038	50.1683	1.79004	0.550964	0.080247	3.84688	0.192001	4.16006	8.61553	10.9124	7.49361
TCGA-HT-8109	171	0	183.046	6.22728	14.5579	24.6925	14.9474	2.00589	0.400648	11.0797	0.236286	0.050128	0.0437077	0.516331	0.0147192	8.85897	22.7203	20.9132	4.6262	0.131481	10.0953	9.77412	12.9568	1.64065	10.0136	9.90496	16.4909	87.1514	8.63397	0.739857	56.3433	2.25415	0.423343	53.9091	2.21629	21.3601	5.94509	7.18107	3.50323	58.4143	0.516432	0.308826	0.0188991	1.37567	0.372137	2.48027	6.56738	8.41999	7.41652
TCGA-FG-A4MY	723	0	318.752	4.94448	12.9223	23.4011	16.8941	1.32186	0.745657	5.57645	0	0.147307	0.0119626	0.967773	0.12784	11.363	43.5872	20.1281	3.81674	0.0287885	11.2271	30.199	4.94603	1.98285	13.6242	4.54608	24.7341	62.9515	2.43273	0.147743	9.23538	2.97352	0.166253	9.10085	1.70127	28.1182	12.9066	5.87601	2.60256	36.3171	1.09845	0.0563494	0.0527605	0.642547	0.127374	3.92248	6.01429	7.86877	8.42977
TCGA-HT-A61B	535	0	524.734	4.44303	13.888	21.8998	10.0713	2.21545	1.32882	48.2108	0.0314471	0.273882	0.00513268	0.424006	0.093595	10.3072	60.224	27.0761	2.79759	0.133813	15.0698	35.8707	5.85592	1.26844	17.965	6.95911	17.4449	10.4563	7.02915	0.350763	5.7771	9.45622	0.0723665	12.1595	13.985	38.7577	70.8545	8.91287	3.71491	47.9421	0.687316	0.201478	0.0628818	0.318106	0.421268	5.00561	6.78273	10.3086	9.12802
TCGA-QH-A65X	484	0	1138.76	2.48721	23.7419	26.1819	8.26255	1.18514	0.716756	1.867	0.0109592	0.304697	0.0214647	0.591059	0.0113782	16.0796	41.9205	31.1972	1.69071	0.0753311	6.28922	32.5788	3.08034	0.885677	5.30671	2.87166	82.5985	13.7538	4.92009	0.375556	2.68589	0.893269	0.0432335	20.9477	0.461974	53.4745	9.16551	4.84599	1.82161	25.3029	0.521828	0.202217	0	0.517342	0.172602	7.21817	7.74591	7.44193	11.1436
TCGA-HT-8019	1006	0	147.147	2.83412	23.535	24.1239	8.2886	2.81218	0.365601	1.73837	0.0158875	0.0399142	0.0479723	0.291773	0.0313404	12.1494	22.9535	22.0968	1.92875	0.819052	8.01192	1.65261	10.2485	0.70034	5.62945	7.85065	32.4685	28.3628	7.71259	2.49482	15.0145	1.06129	1.29659	124.73	1.27421	17.0406	2.44834	6.72153	3.27251	25.0813	0.365843	0.720667	0.128663	0.460705	0.785171	4.24052	5.03059	16.5878	5.15222
TCGA-HT-7695	444	0	197.66	5.95004	17.7973	24.9512	11.3883	2.00574	0.420107	6.04304	0.0876908	0.103789	0.0181293	0.490607	0.0218505	8.00456	23.9316	21.0123	4.65024	0.370271	8.93347	16.6599	11.8465	1.94034	10.1291	9.16004	16.4577	70.2934	10.4044	0.695282	46.2725	1.19305	0.576558	63.1159	1.41139	25.4306	4.5914	8.46476	3.4179	56.2172	0.515655	0.283159	0.0420833	0.185294	0.17462	2.55159	6.23507	8.83712	8.00922
TCGA-HT-7480	2289	0	303.124	3.83155	10.4219	27.7161	9.71969	1.81649	0.43361	4.78062	0.0413094	0.108394	0.041578	0.613	0.0214444	7.69472	23.9609	18.7834	5.13748	0.236626	6.64098	21.0778	8.31266	2.42796	9.13249	8.27712	15.8486	48.2897	5.5883	0.710582	42.2008	1.28269	0.217284	30.1537	1.62828	25.7854	5.57098	6.98503	3.33927	56.5599	1.02648	0.396997	0.0206507	0.0371439	0.160781	2.90953	7.47889	9.67017	7.13647
TCGA-P5-A5F0	289	0	206.147	4.97949	14.2256	24.5644	8.73641	1.3297	0.320837	1.25035	0.230047	0.098076	0.0460809	0.714668	0.0238843	10.1553	23.9802	21.5565	3.38519	0.308043	7.73371	14.6419	9.19674	1.92512	8.23097	8.89543	23.2183	15.0477	7.45863	1.88864	14.1462	0.403724	0.747674	44.6518	1.13346	29.2724	4.71443	7.62166	2.62042	39.0512	0.971312	0.37785	0.0188183	0.0775687	0.335053	3.94691	6.89895	13.699	6.78557
TCGA-S9-A6UB	3238	0	436.99	7.54864	13.4696	28.4699	11.4191	1.04926	0.759516	3.05443	0.240389	0.129539	0.114295	0.719188	0.0303837	8.80971	33.942	30.5754	4.80777	0.313029	7.70434	21.0659	10.5165	1.91517	8.8315	5.50951	21.7798	71.1937	3.72349	0.703688	29.4127	1.12733	0.0721549	14.871	0.761003	46.7308	2.81311	7.54246	2.59018	54.9858	1.17481	2.57941	0.0188094	0.68369	0.14758	2.81098	8.10192	8.7496	8.32252
TCGA-HT-7473	505	0	170.985	5.9456	11.9294	18.9976	13.4845	3.83056	0.376022	43.1478	0.212425	0.0355784	0.0226696	0.943955	0.0542884	10.4581	31.882	16.1819	6.2756	0.625782	17.6679	12.5593	8.8814	4.66432	13.2373	9.22597	12.9401	16.181	6.70133	0.167988	3.63655	9.33315	0.0161154	8.59641	9.89381	22.397	25.5143	7.08617	6.19517	67.4621	0.650504	0.0314072	0.0098023	7.20675	0.0133113	2.97055	8.04695	5.62696	7.94726
TCGA-TQ-A7RV	1870	0	605.851	4.55739	10.2483	28.1121	19.615	2.11538	0.225203	8.45438	0.026148	0.0496337	0.0398326	0.970545	0.0416265	10.8928	52.02	22.7843	2.65902	0.0984263	14.1334	17.4589	6.24527	1.56322	13.5896	5.89612	19.2476	48.4132	3.46167	0.678188	14.0447	3.85126	0.180516	18.4809	2.4526	33.8215	9.41336	5.74959	2.28092	45.0776	0.952495	0.0670107	0.0209143	0.529004	0.227209	3.726	8.76592	9.86285	8.38206
TCGA-QH-A6X3	315	0	290.594	6.34872	14.5789	30.0693	22.4965	3.03919	0.527763	5.58268	0.177414	0.0437898	0.0213366	0.655548	0.048473	7.55187	51.8276	22.7904	4.34592	0.132953	21.501	2.79519	8.6286	2.37686	18.2273	7.1731	14.0897	23.375	5.84567	0.0602324	15.7908	3.83407	0.0368362	15.2523	0.777006	26.0839	14.7385	7.32209	2.33781	58.2818	0.736162	0.193832	0.0392101	2.92181	0.0709954	2.77542	8.8535	6.70915	10.0344
TCGA-WY-A85E	635	0	235.921	4.42305	14.1426	26.5677	8.86156	1.88257	0.605648	3.21114	0.0255712	0.0828017	0.0459101	0.602376	0.0194692	9.19783	49.2001	23.4762	3.08864	0.255286	16.06	17.4674	10.3076	1.49927	16.134	9.28197	18.3443	8.98217	3.21539	1.46735	23.1529	3.11335	0.180738	20.7803	1.84787	30.6366	8.32279	6.63989	1.97445	43.1105	0.904872	0.275237	0.020453	0.563322	0.212939	2.96466	6.32634	8.12622	6.49679
TCGA-HT-7855	587	0	399.85	6.35578	15.5292	35.5204	17.9737	2.45063	0.604231	9.68889	0.0164469	0.0275464	0.0147642	0.978787	0.0614727	9.38087	38.0686	30.1157	6.47889	0.0363382	19.615	16.114	10.5596	2.86447	16.8414	6.83467	14.2653	4.47795	7.85217	0.0629919	5.79976	4.2132	0.0811027	9.55998	2.305	28.8965	10.9272	5.74753	2.69194	54.539	1.21321	0.246574	0.0197324	0.465837	0.0803887	3.36338	9.36191	9.73813	7.57866
TCGA-E1-A7YD	437	1	186.715	4.27346	21.5998	20.2643	9.77188	2.79142	1.1718	7.22555	0.0939665	0.566573	0.0102246	0.303392	0.00433597	16.4857	70.1776	12.7452	4.28166	0.0153787	20.3059	4.49582	5.81604	1.97633	21.4637	7.18256	31.4739	14.7858	15.8298	0.46302	8.46625	2.86015	0.0566335	13.0259	2.64642	24.2563	11.1342	7.37272	2.51987	18.994	1.03503	0.00802709	0.0250528	0.887158	0.0056702	6.01354	5.7173	6.3192	8.50565
TCGA-HT-7858	1542	0	452.484	5.81948	15.3272	29.1575	16.8489	2.34842	0.407182	21.9166	0.0512838	0.105936	0.022321	1.26968	0.124238	13.1384	50.1541	23.4855	3.81676	0.260188	14.5639	15.2763	8.48601	2.36778	16.4375	6.1047	17.2841	65.0541	6.26267	0.155066	12.7325	8.31822	0.0168593	12.435	4.74476	29.9509	23.2303	5.95621	3.49546	59.468	0.460359	0.223427	0.0256369	3.53337	0.111406	3.18205	7.90321	5.74675	9.0424
TCGA-DU-8162	446	1	157.166	5.12412	19.8423	25.1355	13.8389	2.26428	0.389709	8.46413	0.0146258	0.0465429	0.0417754	0.521904	0.03037	11.1967	27.1018	19.9511	3.99068	0.136439	10.4342	5.78575	14.5046	1.27048	11.1233	9.87553	20.6355	93.0235	19.8897	1.21763	15.7515	2.04364	0.652707	82.3282	2.48615	17.9862	4.77481	7.19259	3.26452	38.4288	0.33679	0.387941	0.0263213	0.133154	0.512326	2.11594	6.60172	10.2517	7.66073
TCGA-HT-A5RC	164	1	207.241	5.11396	9.65843	21.3016	14.8704	3.31731	0.637807	11.0022	0.0923281	0.567004	0.0117207	0.248021	0.00426037	11.968	50.0257	9.8702	3.14524	0.125921	16.9932	16.3552	5.03541	3.25418	14.959	6.63275	16.0445	26.3363	46.2125	0.26056	11.0797	3.51442	0.0303524	8.64201	6.8517	34.1878	12.0289	8.02318	4.22142	27.4962	1.06503	0	0	0.747163	0	2.87623	7.62233	6.4706	7.70604
TCGA-FG-A710	1117	0	388.526	3.97263	16.1206	23.7882	10.3914	2.04619	0.735732	17.9352	0.0325428	0.226195	0.0225739	0.433105	0.0270296	12.6491	32.6885	26.521	2.86153	0.167769	8.24554	23.5141	8.70925	1.8248	8.86106	7.29411	24.6329	40.0033	4.84048	0.724876	25.1676	4.52223	0.196581	26.2767	5.50949	32.8905	29.7792	6.8083	3.86692	43.5997	0.876379	0.212668	0	0.0658379	0.194409	3.57749	6.9421	7.52917	8.90327
TCGA-HT-7467	5	0	210.239	3.83659	12.9245	22.7759	12.5952	1.89142	0.304686	4.51244	0.0309304	0.0849593	0.0393772	0.427106	0.0128452	10.0709	26.7972	18.4945	3.79725	0.239944	8.04462	9.66334	8.70554	1.35276	9.17942	6.1084	18.7231	273.001	6.62911	0.725747	23.1891	1.0653	0.488075	54.8168	1.48671	24.7098	5.73035	5.70724	2.92168	48.6482	0.840201	0.175973	0.0111328	0.0959497	0.215013	2.58057	5.40726	8.27854	9.7546
TCGA-HT-7605	141	0	211.582	3.91366	17.182	20.7594	14.0579	2.32573	0.583399	6.66293	0.112117	0.0709399	0.011183	0.375028	0.0142272	8.41882	23.6972	20.1967	3.22877	0.366985	9.03585	10.0241	8.89643	1.63666	8.23354	8.34702	23.682	165.783	6.99897	0.565014	50.5906	1.60706	0.356295	62.1683	1.54812	26.5204	8.21321	7.34574	3.51348	47.4589	0.335481	0.249019	0.00747303	0.0546064	0.14884	3.28945	8.78636	7.30746	9.12254
TCGA-FG-6689	192	0	404.618	3.97211	11.513	19.3794	15.135	2.98242	0.310742	9.93379	0.0349865	0.0703174	0.0159891	0.582341	0.0334183	10.6018	43.0727	20.7378	3.697	0.158036	14.8081	9.0973	7.13868	1.90816	11.1379	6.48285	19.6448	59.1059	6.1252	0.634731	13.2927	5.99071	0.338149	36.6644	4.41296	26.3773	15.8213	6.1665	3.16893	44.7956	0.568044	0.263606	0.0335805	0.500192	0.178606	3.17966	7.42132	6.85127	7.50784
TCGA-HT-8107	16	0	120.071	4.30247	19.442	27.6007	9.81448	2.26724	0.270266	2.12806	0.0418403	0.0513898	0.0352833	0.442558	0.018824	11.771	26.4389	21.1454	4.1504	0.879921	8.11515	2.08747	11.243	0.798626	7.35187	9.35074	23.3257	65.4625	22.6025	2.31377	23.9934	2.14535	1.86034	136.704	1.50413	17.4503	7.68527	7.42782	3.56273	35.0947	0.353814	0.788113	0.142229	0.550211	0.685473	3.49307	5.18885	17.268	6.32407
TCGA-FG-6692	415	0	390.19	3.45549	23.4041	23.8355	8.39192	3.96366	1.07281	10.8301	0.052546	1.42824	0.0134772	0.137858	0	9.89384	59.7995	10.6003	2.01968	0.0110568	12.6374	28.0398	2.60691	1.77777	14.598	4.48181	36.0722	4.05	4.63915	0.668822	8.88636	4.80279	0.0222098	8.09422	2.5109	34.7732	154.457	7.63513	3.21909	17.85	0.433602	0.0981112	0.0315214	1.79709	0.0203836	4.42971	3.77175	6.92278	7.15377
TCGA-DU-8168	433	0	221.051	8.51335	13.8888	29.919	7.81386	0.502726	0.513194	2.64893	0.0115561	0.263228	0.0358368	0.883835	0.0731876	7.97509	27.7268	24.5617	7.39948	0.0652494	6.97273	17.2366	15.3853	3.31115	10.2103	10.9683	19.3719	12.2121	10.7995	1.62132	31.3355	0.552405	0.250735	32.3932	0.708561	33.1377	5.2788	7.644	2.09448	57.0647	1.84018	0.404251	0.0346616	0.623451	0.329488	3.44269	4.56022	12.3788	7.36773
TCGA-P5-A5F1	181	0	421.671	2.57572	12.8527	16.1747	22.7433	7.77782	1.1057	9.43924	0.276004	0.0284474	0.0121284	0.424457	0.0264514	11.2856	37.3975	23.6782	2.67651	0.0781808	20.3823	2.4728	3.77784	1.23409	10.1831	4.66669	30.6798	36.1662	3.35584	0.0599165	15.8134	2.46565	0.0314083	12.788	2.76628	44.8293	25.9943	7.07393	3.14123	38.7464	0.488891	0.0571305	0.00636808	0.221924	0	4.13966	5.24206	6.36803	10.223
TCGA-HT-7880	164	0	189.666	3.21891	17.5874	20.0001	12.8068	3.47911	0.359885	4.30043	0.0129193	0.0908799	0.0579875	0.415959	0.0335331	10.8683	28.0933	17.6559	2.45142	0.326672	9.84408	5.03695	7.6018	0.884954	8.09994	6.12922	26.6515	156.736	13.0902	1.33078	30.2902	2.12189	1.01294	70.551	2.98468	22.8985	5.534	5.60924	2.7074	30.1323	0.504227	0.327778	0.0155001	0.0609868	0.284158	3.38328	4.97243	11.7065	6.79278
TCGA-TQ-A7RG	601	0	259.329	4.55526	7.45454	24.455	13.5681	2.10356	0.582856	7.82169	0.0765611	0.164867	0.0196366	0.874646	0.0590486	9.80311	27.0252	23.1082	4.85315	0.209431	7.91438	14.4864	6.82379	1.96161	9.1615	8.1512	19.1056	72.1024	3.65012	0.630555	40.7832	2.41303	0.0755073	14.0048	1.95797	30.7011	9.37006	7.37875	3.22127	52.5634	0.512247	0.126133	0.0196833	1.42353	0.0356393	3.30742	8.32462	7.07184	9.03081
TCGA-HT-7692	92	0	354.684	3.63687	14.058	25.9135	15.1461	1.944	1.32427	4.55034	0.279826	0.182261	0.0202988	1.26126	0.183999	8.86268	22.2673	24.1089	2.28868	0.198452	5.86924	14.711	9.3428	1.03128	7.55623	6.25809	24.7845	14.6104	3.02072	0.404252	29.7573	2.20079	0.0958245	13.8294	1.08085	26.001	7.22011	5.04318	1.82749	46.3135	0.412585	0.209162	0.0139886	1.2266	0.109756	5.46623	5.83422	6.27968	8.0206
TCGA-HT-8558	420	0	149.749	3.88847	21.9098	24.7465	12.3525	1.47883	0.236921	2.49746	0.0225711	0.10333	0.0257878	0.664627	0.0406191	12.1988	26.0805	23.7651	2.70504	0.380483	8.46142	2.19756	15.2436	0.913674	8.18759	9.21551	28.0751	127.811	7.10413	1.47719	14.9446	1.30026	1.64727	136.686	1.33863	19.771	3.65399	8.25495	3.96912	31.9622	0.252533	0.595794	0.0857533	0.126844	0.449461	3.68075	3.2618	13.346	8.23353
TCGA-P5-A5F6	41	0	165.667	7.89452	23.2325	48.41	10.0689	2.48869	0.27211	4.32869	0	0.100793	0.119832	12.8791	0.332397	21.728	95.5088	54.6927	1.07857	0.0236378	29.2976	4.76437	13.3634	6.49155	5.83913	7.83905	16.6898	0.0401732	4.91735	0.655074	0.127611	4.27818	0.4392	73.7525	1.28488	13.3833	62.8997	3.04653	1.97276	58.0121	1.35288	0.00925354	0.00722015	0.462652	0.0392192	3.90149	5.27332	17.745	4.77391
TCGA-DH-5142	924	0	492.773	3.79447	8.3946	27.8654	13.2208	3.03308	0.681341	46.1652	0.0344422	0.118257	0.0224861	0.26222	0.0232434	8.76056	70.8408	21.9551	4.05239	0.0972357	21.275	24.7258	5.47902	2.8579	17.484	7.11786	13.2487	23.378	3.72745	0.1215	13.1743	4.52761	0.0551982	14.2824	12.5295	45.3664	45.7079	8.08638	3.2108	62.6108	0.81327	0.0331001	0.0671492	0	0.0514389	3.07681	8.77625	6.50802	9.17549
TCGA-DB-5273	2495	0	360.859	3.03606	14.3242	23.0408	11.913	4.28985	0.440388	20.4395	0.0311667	0.234901	0.0178042	0.30249	0.0161792	12.4788	63.9374	18.2069	2.56639	0.126244	16.1692	17.2244	4.96788	3.6064	14.4408	9.84008	18.6568	86.534	3.93982	0.0785321	21.9142	3.15633	0.0192111	9.9113	5.56231	28.733	22.3278	5.94886	3.09458	49.8381	0.364922	0.0479235	0.0420668	0.0315269	0.0507785	2.74817	9.17992	4.58203	8.69082
TCGA-HT-7693	535	0	413.256	5.95885	14.9895	21.4711	19.0218	2.7178	1.00983	23.0665	0.0643727	0.6777	0.0165105	0.523761	0.309346	8.79939	37.8418	22.7241	7.0277	0.0903027	16.0561	15.6439	8.69985	2.53559	16.0898	7.88993	12.1847	13.4837	8.3928	4.37484	16.0522	5.35963	0.1043	15.0909	7.39558	29.014	49.9561	10.4652	2.85939	51.5475	1.2562	0.275738	0	2.02792	0.349599	4.46891	11.0707	8.53521	9.62737
TCGA-DU-A7TD	230	1	204.996	6.32164	12.3027	21.4861	8.27842	2.37868	0.526846	35.9769	0.0517853	1.58549	0.0101426	0.392453	0.00645184	16.7813	58.7911	9.91248	3.44283	0.0152554	15.7937	26.6137	5.73647	3.44652	21.2442	7.17425	14.7724	12.0401	24.2355	1.03971	0.652529	4.15112	0.0459652	7.19803	9.08902	27.4415	34.6212	7.67211	2.957	27.1947	0.889298	0	0.0186391	0.621622	0	3.36572	4.45937	9.98523	7.29889
TCGA-FG-8186	489	0	256.545	4.6629	14.468	24.4442	13.6789	3.26906	0.709009	13.977	0.386687	0.064765	0.0631136	0.449462	0.0184008	7.87255	27.0825	20.3083	3.20581	0.415312	8.87385	12.1914	8.46235	3.14732	10.379	7.5921	13.5045	53.8932	9.32538	0.695037	34.1407	4.84326	0.123149	23.705	6.31991	26.8383	18.174	8.23971	3.88863	53.8274	0.716871	0.198196	0.0241632	1.61352	0.227504	3.66073	7.31173	7.1116	8.37186
TCGA-DU-8161	724	1	166.99	5.21292	26.8475	32.0557	15.1065	8.23583	0.354855	60.561	0.0067613	0.149481	0.0154498	0.282921	0.00701981	11.5061	38.4871	12.8933	4.43201	0.348567	21.9359	11.2529	6.42226	4.23694	11.7801	7.8033	18.2747	27.7743	8.55843	0.223522	15.2996	8.78449	0.0466776	17.5544	7.83606	22.0553	12.733	4.63828	4.42035	43.261	0.27972	0.0259913	0.0973436	1.54116	0.0403916	3.61115	7.08512	5.76181	10.1262
TCGA-QH-A6X9	60	0	229.848	6.61472	13.5914	25.2903	13.5574	1.82035	0.515315	10.681	0.203874	0.0326615	0.141783	0.712973	0.0220872	9.05266	42.1632	20.4502	4.06207	0.0348169	13.4407	14.003	9.64981	2.86925	15.5251	7.3076	21.1465	25.4188	5.98988	0.83623	21.9248	4.31325	0.131131	19.0264	2.68838	28.2359	8.64757	6.75389	2.26435	42.8171	0.802619	0.170373	0.0638088	0.298884	0.0577674	3.18668	6.72268	11.0654	8.02983
TCGA-S9-A6U9	2920	0	326.067	3.34633	12.5217	15.8872	14.6654	3.46433	0.443715	22.2433	0.0757983	0.0634761	0.129901	0.97134	0.0708267	12.8688	23.9333	16.2267	3.9431	0.111647	15.4454	5.7954	6.27324	1.45772	9.73246	4.47785	23.1982	50.2629	4.59218	0.0993159	8.40356	16.212	0.0607384	12.7866	5.81981	24.3632	31.0204	4.75734	2.99642	45.7956	0.673021	0.0509912	0.0568376	19.3028	0.0463105	3.54279	5.20629	6.8052	9.30808
TCGA-HT-8563	862	0	200.578	6.29254	14.5295	14.7742	11.4023	5.05756	0.519442	63.8129	0.0073105	0.29141	0.036989	0.159749	0.019734	13.3704	36.3034	15.0125	4.5747	0.585062	19.3103	12.7283	16.0148	3.20045	15.1931	6.05136	6.98897	5.11893	19.6353	0.153259	3.69065	7.68355	0.0396543	17.724	18.8662	19.7466	82.486	8.78387	5.8323	62.9181	1.04998	0.022482	0.0175418	2.64741	0.0119107	3.1033	7.51243	8.15274	8.99933
TCGA-DB-A64W	440	1	326.214	6.80004	13.0062	27.6478	8.52848	0.844002	0.620881	0.879807	0	0.406902	0.0309218	0.616585	0.0115704	10.3015	37.3037	30.7501	3.30069	1.0615	8.87797	28.0816	13.8633	1.84943	13.4422	11.7118	25.0765	15.7955	6.35928	1.36585	30.1438	0.430273	0.604499	57.4549	0.274544	29.2248	2.64942	10.0802	2.40371	53.1118	0.817708	1.9278	0.0267411	0.075154	0.478132	3.567	6.49716	13.9118	8.62824
TCGA-TM-A7CF	1690	0	298.623	3.61202	10.2796	18.8351	9.70998	2.73816	0.453928	5.5803	0.0973015	0.028972	0.0476436	0.862054	0.0448986	10.2139	36.3751	15.5247	3.10823	0.138012	10.9014	15.4077	6.82087	1.63531	10.5694	5.72928	29.3879	18.8599	7.80674	1.13761	4.93115	2.31897	0.410505	30.5557	1.82295	16.7057	8.42676	3.62452	2.87674	32.0947	0.725761	0.141304	0.012971	0.0801991	0.311187	3.01646	6.46666	13.3307	5.5598
TCGA-S9-A6WN	486	0	197.655	4.72994	7.00733	14.8508	11.8863	5.7866	0.41633	8.85381	0	0.287866	0.0930165	2.01248	1.07255	44.5387	19.2441	22.3466	5.78829	0.772808	11.4924	8.00167	14.3283	2.1658	5.05288	6.05611	16.2102	11.6892	9.17622	0.145879	30.6525	8.17154	0.218576	14.0825	8.63672	24.0316	16.6439	6.78502	3.507	52.771	0.44485	0.30601	0.0325591	17.0322	0.0786038	2.35911	7.33497	4.46016	7.73516
TCGA-DU-8165	584	0	221.651	8.26373	16.4788	20.7898	11.6496	2.22616	1.12393	51.7026	0.111765	0.564978	0.0779425	0.311781	0.0379762	12.4463	53.1422	8.96104	4.42246	0.119727	26.1588	15.9297	13.1601	4.90039	30.2517	9.5413	13.3282	12.3178	13.9554	0.749618	7.52011	5.09351	0.0250515	8.07994	5.76262	23.9031	26.2171	11.0535	3.89679	36.2766	0.507587	0.0312464	0.0670458	0.109631	0.011036	3.46761	10.4686	10.7611	10.4061
TCGA-S9-A6U0	700	0	364.877	4.26418	17.6781	17.6985	11.3078	5.13986	0.30478	14.0177	0.0235917	3.87623	0.0789364	0.246794	0	14.4367	14.4312	12.5079	3.62165	0.133206	16.7957	14.5955	4.84371	2.21245	17.7798	5.88489	35.4941	8.29059	8.85058	2.19233	6.4048	7.05554	0.0116335	9.43015	7.81379	22.7102	18.7689	6.22744	3.18508	37.669	0.368305	0.0362758	0.00707613	12.6959	0.0128123	2.89341	4.31369	7.26603	7.89503
TCGA-P5-A5EV	9	0	353.26	4.18882	23.5546	33.7906	11.8575	4.31491	0.578315	11.4972	0.0734604	0.0768978	0.0119899	0.456815	0.0228807	10.8794	52.9712	31.552	3.74975	0.0586102	22.5528	13.6534	6.50066	2.76599	12.6354	6.65341	27.3676	6.99897	5.63213	0.32948	17.3746	2.61115	0.0498089	19.7796	2.13145	35.956	13.3244	4.30703	2.83183	48.9294	0.989146	0.0494184	0.0495761	0.216736	0.0997381	3.85803	9.6546	7.64276	9.4659
TCGA-HW-8322	544	0	328.238	6.99497	10.7681	28.2445	9.62661	0.882729	0.440354	6.19588	0.552279	0.268248	0.023662	1.00142	0.053039	8.06135	29.8953	19.622	4.61059	0.179643	6.64193	26.9116	9.57667	3.24304	10.5038	7.18939	13.8688	46.6194	5.15832	1.09936	26.6061	1.64154	0.08851	15.3705	1.19049	29.4794	5.27535	7.55306	2.96685	57.1653	1.11008	0.206995	0.0538366	0.698328	0.0974787	3.00374	5.1443	10.38	7.57095
TCGA-QH-A65S	79	0	390.828	2.89419	13.0914	17.6344	14.4131	3.9333	0.703303	12.483	0.0241954	0.174254	0.02172	0.447161	0.0602893	9.53107	42.5024	20.4129	2.35722	0.314808	17.7253	6.45831	4.32456	1.33321	14.67	4.91567	20.3731	104.037	2.97244	0.097546	29.1928	6.53917	0.0178968	11.4447	2.21206	28.8941	16.6608	7.2117	2.394	42.7633	0.453276	0.0837092	0.0290288	2.2925	0.0262803	3.17142	6.53965	4.87706	9.18449
TCGA-E1-A7Z4	4414	1	343.589	3.42418	14.783	16.5413	13.2255	3.91784	0.343752	17.317	0.0177389	0.00891311	0.015924	0.573199	0.0221006	9.57088	31.8874	22.2309	2.48837	0.0217738	19.9629	2.57683	4.18695	1.86672	10.1569	5.10206	23.8457	19.2977	4.74659	0.236003	6.06186	6.57708	0.109342	10.4753	3.82622	38.6403	18.3298	6.16696	3.53494	39.2688	0.983113	0.170477	0.0159619	0.299066	0.0481687	4.36807	6.35758	4.94208	8.50001
TCGA-TQ-A8XE	956	1	360.325	5.26826	16.8363	26.5003	13.2093	2.88419	0.416574	18.4244	0	0.33284	0.0327472	0.619667	0.0416616	13.4342	71.0855	23.7675	4.51719	0.262691	20.078	2.72618	7.64567	3.01417	16.4531	6.4818	21.8877	88.5343	6.84701	0.150222	13.3596	4.84225	0.0518244	14.2539	4.79631	36.4358	12.2654	5.87803	3.00164	44.9834	1.36477	0.00734546	3.26114	8.78831	0.0311322	4.46363	5.16209	7.14683	9.03804
TCGA-HT-A61C	539	1	345.869	4.35933	13.225	26.1164	6.62087	3.81111	0.736386	11.5457	0.0288002	1.16733	0.0172358	0.459733	0.027908	16.5114	48.288	17.8143	2.07886	0.0424213	9.60222	26.5612	4.10097	1.44795	18.0391	5.16259	49.7697	41.0858	16.9389	0.708275	15.8393	8.71914	0.0331378	17.8242	4.75631	31.5916	89.1484	8.73299	3.63971	22.9819	0.397163	0.125473	0.0287946	1.28186	0.172051	5.51108	5.71624	11.1287	9.35097
TCGA-TQ-A7RW	823	1	537.037	6.44914	12.9304	27.0363	14.2842	2.91972	0.454378	38.5487	0.128962	0.0863977	0.27172	1.01385	0.0949421	17.1175	42.9645	23.9146	6.60634	0.195711	16.1224	13.2291	8.87441	1.8848	15.3681	5.83255	19.0074	30.229	4.19793	0.141797	20.003	9.26849	0.0751558	8.05902	10.0381	27.4028	9.45656	6.52855	5.25255	67.4124	1.18968	0.0811221	0.0421974	3.39967	0.101872	3.29976	7.25013	8.82017	8.44619
TCGA-E1-A7Z3	2237	1	281.596	3.38929	18.99	22.1248	11.5178	5.79575	0.473545	8.79741	0.0426532	0.100014	0.0226255	0.46355	0.0642119	13.0154	37.8153	22.2751	2.96851	0.0785326	10.8859	10.2953	10.5325	1.25808	9.37246	6.08027	30.2893	24.3116	11.358	1.2983	12.1385	4.06474	0.378595	49.2261	3.7828	21.8497	15.0475	5.4808	2.92857	35.6057	0.840681	0.303334	0.108744	0.323597	0.747049	4.11189	8.24288	11.2135	6.69517
TCGA-P5-A730	335	0	575.402	4.1526	23.1395	31.5547	17.7852	1.93152	0.940936	2.22891	0	0.0627362	0.0271718	3.03559	0.367291	13.9945	27.7582	36.4884	4.35048	0.388254	14.4032	16.6637	9.02528	1.4704	8.51491	5.35677	14.9552	67.7909	5.94541	0.0922857	7.86647	0.663162	0.0307848	16.8115	1.23607	35.6239	17.5627	6.9174	2.25143	54.4736	0.8934	0.311981	0	0.0771841	0.0621578	3.41803	8.14995	7.42293	10.486
TCGA-HT-7478	196	0	376.443	4.85757	14.0072	19.0234	10.729	4.05058	0.395344	44.2163	0	0.065123	0.0199789	0.500489	0.0209321	10.6876	49.5531	21.886	3.96526	0.0777767	20.2908	19.3653	8.2169	3.6346	15.751	9.89686	11.6897	21.5065	14.9047	0.23804	13.6903	13.7281	0.0887668	16.3047	9.05851	23.4956	44.1772	7.92261	4.79235	69.7498	0.354094	0.0553589	0.0215971	1.70438	0.0899405	2.84315	11.6186	3.01295	9.37153
TCGA-CS-5393	1224	0	600.881	5.52315	13.9917	25.9027	15.1466	2.04712	0.267519	15.7717	0.0537275	0.158976	0.0379999	0.859724	0.0446254	8.61266	41.1018	19.5271	5.36842	0.0571552	11.3565	15.7302	6.86089	2.04331	18.0428	7.26953	18.7389	36.9121	7.95445	0.422384	4.31434	5.86094	0.0706506	15.3207	4.44141	27.2261	16.3237	6.69334	3.30596	58.6124	0.810814	0.117037	0.0214868	0.797112	0.131304	2.30605	7.53677	8.43603	7.73182
TCGA-VV-A829	1129	0	367.937	5.51168	9.36136	34.7932	13.184	1.18801	1.04099	4.50729	0	0.23784	0.0106739	1.47901	0.605258	13.2137	21.3156	34.4227	9.83966	0.39448	9.76029	10.0524	12.9987	1.14262	8.71319	7.8535	18.8818	1.41437	3.10819	0.15066	36.0192	2.38179	0.0322484	17.3852	2.07139	39.7523	8.29722	8.38279	1.76885	73.4608	0.809471	0.136471	0.0224174	1.03955	0.0304424	4.04461	9.74695	8.05166	8.71916
TCGA-S9-A6WM	606	0	249.567	4.74241	14.1172	19.2669	8.2274	3.75038	0.63354	9.58564	0.265569	0.262832	0.0157619	0.266588	0.00501314	8.51338	26.4115	10.9602	3.00426	0.0118536	22.0377	26.5096	3.09321	1.9511	14.8928	5.09736	13.8936	8.24531	14.8548	0.992797	5.01606	2.13058	0.0238103	8.6843	2.0288	41.5196	9.83934	9.30362	4.11338	21.1507	0.725542	0.0556843	0.0144827	0.0325622	0.0524459	2.94784	7.64121	9.4056	11.0885
TCGA-DU-A7T6	549	1	646.264	3.45109	19.2293	33.1613	9.90251	2.66059	0.503311	3.27585	0.00663134	1.15509	0.0183998	0.232778	0.0206547	14.505	36.3366	33.3524	3.413	0.367914	7.93721	31.7165	10.7591	2.0061	10.0258	6.70755	36.7234	27.71	5.43399	6.28269	5.9803	2.84072	0.366243	27.9706	1.20165	41.8189	7.98959	5.22054	2.57088	51.8476	0.93691	1.51421	0.700132	1.13589	0.734682	3.4101	4.53285	8.11795	8.63082
TCGA-HT-7608	673	0	219.063	2.7908	8.14092	17.9349	15.1273	4.83682	0.540972	5.01895	0.374617	0.0748096	0.00940672	0.294755	0.00897556	7.78581	17.1363	19.0456	4.62853	0.0424456	7.47326	6.75373	3.44899	2.20119	4.93671	6.35419	17.2818	49.8317	7.68095	0.159744	14.495	2.57839	0.0746027	20.27	2.52019	28.2563	11.677	5.72733	3.18934	48.9908	0.382395	0.13293	0.0216083	0.267207	0.0430373	2.61345	10.1857	4.51692	7.56129
TCGA-S9-A7J2	64	0	333.248	4.62347	13.1042	31.1904	9.4329	2.39071	0.611286	4.60137	0.00890674	0.113374	0.0436118	0.58389	0.0221935	10.2633	28.2502	24.9492	4.61308	0.170549	6.37495	19.6385	7.43663	2.04778	8.29048	7.69646	16.5003	27.482	8.14716	0.373446	46.3796	3.89733	0.118586	12.065	1.27752	32.637	8.46988	6.7726	2.88061	52.6409	1.02201	0.417711	0.005343	0.132142	0.145114	3.38125	11.9694	9.60297	7.6905
TCGA-QH-A6CV	444	0	372.331	3.06676	13.1582	20.7886	9.82329	5.23234	1.44014	22.0486	0.0371583	0.292505	0.0212269	0.269941	0.0115737	15.0772	35.1885	14.0106	2.47522	0.0638543	18.7523	13.0896	3.43902	1.56572	14.1598	5.2502	40.1486	41.697	6.60931	1.5505	10.9024	11.5114	0.0320659	13.6948	6.89608	38.564	19.2375	6.6846	2.5835	26.2612	0.551096	0.0142841	0.0111453	6.47136	0.0151351	5.23178	5.30538	7.93878	8.04899
TCGA-TM-A7CA	1060	0	267.263	5.51221	12.4912	27.6421	8.95019	1.59138	0.534891	10.1329	0.0325799	0.0509293	0.0319055	1.27492	0.0608861	8.16132	48.0531	20.968	4.16376	0.0479886	14.9451	5.66797	9.91787	1.59574	14.814	6.83322	23.8865	24.0299	4.14167	1.01576	5.84793	1.78367	0.128526	16.4216	1.849	34.5701	8.00367	6.40654	2.17668	40.6769	1.12745	0.0667954	0.0390882	0.0585893	0.176937	3.73883	7.58183	11.4786	7.79845
TCGA-TQ-A7RK	1343	0	472.634	5.47126	14.7553	28.5023	10.9956	2.74774	0.915982	8.20841	0.0100393	0.0538062	0.03441	1.44229	0.141754	9.53985	47.9121	25.0251	3.23916	0.172519	12.4383	21.5835	4.32053	2.06954	12.3904	4.18875	29.7551	20.7634	2.45888	0.481643	5.98732	2.7071	0.0594064	9.81877	1.47843	36.8142	10.3481	6.33726	2.78503	35.8841	1.13629	0.509417	0.0903356	0.412982	0.0926869	5.52295	7.87988	10.9129	7.07492
TCGA-DU-A76R	650	1	308.585	4.09395	15.1159	22.0252	18.3121	4.73859	0.576939	3.9982	1.02893	0.0446787	0.0357646	0.49389	0.0158262	11.2404	21.5795	22.6406	4.05997	0.0841978	10.3093	10.6465	8.34885	1.89809	6.4673	6.68195	20.1994	42.1886	6.43053	0.683688	36.6477	2.99523	0.399329	30.5138	2.201	27.353	8.84952	7.11637	2.88743	44.3363	0.751106	0.893612	0.00571515	2.86547	0.232832	3.07529	10.5602	8.61997	7.29977
TCGA-QH-A65Z	429	0	318.32	3.68793	16.3321	22.4103	12.901	1.69997	0.896726	2.56367	0.16154	0.192773	0.0214223	0.488188	0.0146752	10.2833	26.2955	26.9247	3.44814	0.228026	7.09477	15.8238	6.54973	1.52715	9.18916	8.15965	33.7604	74.7395	4.63983	0.577996	23.0971	1.62111	0.179231	20.3274	1.33759	33.8657	7.11506	8.28208	2.41573	46.2015	0.890546	0.954757	0.0363394	0.074895	0.0767637	3.86028	7.86185	7.50628	10.3201
TCGA-R8-A6MO	995	0	361.319	4.12106	8.73242	19.2926	11.5112	1.90884	0.831284	3.71902	0.020869	0.253991	0.040874	1.11258	0.0635563	12.2823	27.9403	24.0633	3.77045	0.0546471	7.57364	16.2439	6.2798	1.38591	7.83837	5.16098	30.8001	85.3253	2.31434	0.723564	22.8185	2.754	0.0548847	17.1349	1.76704	38.4751	9.39705	7.05032	2.27393	40.149	1.25433	0.743401	0.012519	9.94996	0.0566683	3.66424	8.10927	7.61214	9.1282
TCGA-VM-A8C8	1311	0	216.147	3.88831	17.0511	18.3068	33.3254	4.30123	0.348087	17.8159	0.0233028	0.0819613	0.0228204	0.761112	0.0362907	8.12104	43.9907	26.8641	2.11099	0.114413	19.3632	10.3849	3.07834	1.40991	10.7276	4.33681	30.3626	34.8536	2.29264	0.352303	2.71538	6.05516	0.0517097	12.858	1.86255	36.3494	9.2201	5.25439	2.83901	54.4263	0.700306	0.0895791	0.0978528	3.00153	0.0316386	4.37569	8.78312	5.32573	7.19489
TCGA-HT-A74L	338	0	262.38	7.32826	6.87291	26.7202	13.5469	2.00288	0.590801	8.7514	0.388717	0.160848	0.269952	1.38736	0.0633065	7.2763	22.7896	19.9793	8.01597	0.0374222	7.38185	14.0692	8.57167	1.64039	9.18652	7.19794	12.4243	35.0347	6.44105	0.734407	35.3284	4.22262	0.0826868	13.8688	2.35754	23.799	5.34544	7.37445	3.02891	53.6857	0.809133	0.187517	0.0228612	15.1167	0.0413934	3.15672	8.7574	8.42431	6.95804
TCGA-FG-8187	613	0	258.449	3.90802	8.24765	16.3149	16.1572	2.29348	0.679254	6.63898	0.105156	0.181994	0.0314659	0.806701	0.0454904	7.77711	19.6437	17.2611	3.10309	0.185007	8.29528	9.82448	6.50492	1.49591	8.58305	6.1975	17.8458	272.368	6.15755	0.279099	23.1114	3.99019	0.133957	25.1876	2.76327	26.696	12.6412	6.07032	2.73689	43.0222	0.670345	0.107796	0.0157704	0.51413	0.0523498	3.20278	7.04869	5.85886	10.0729
TCGA-E1-A7YE	888	1	237.593	6.01715	14.1951	25.2725	10.2194	1.18549	0.377916	22.5827	0	0.895903	0.301933	0.86181	0.100274	14.8925	46.6269	19.571	4.06549	0.116725	17.2384	28.6685	8.55372	3.596	20.4014	7.44196	7.76533	10.2466	11.6564	0.281548	6.89229	3.35101	0.102578	10.8022	8.39061	28.6915	28.1839	7.26486	3.64796	47.0962	2.49944	0.0285591	0.0401103	0.521052	0.0685906	3.82448	4.42368	12.034	9.1977
TCGA-DU-5855	209	0	396.151	5.3697	15.3786	28.9519	13.0785	1.52032	0.590236	20.0733	0.0155532	0.153693	0.00253855	0.506189	0.0193775	20.6794	47.4576	25.5134	9.30249	0.240546	16.3445	17.1507	9.06006	2.12068	13.7597	5.37593	22.3209	7.22705	8.4604	0.348009	13.1701	9.14093	0.141887	16.4695	6.42858	28.6522	20.9046	4.55949	2.77938	49.1501	1.02588	0.173387	0.0839711	1.46842	0.202722	3.59724	6.46755	12.0623	6.80566
TCGA-E1-5319	2909	1	271.923	4.02218	11.1135	24.3947	13.2111	1.58829	0.428744	4.56226	0.0179999	0.138678	0	0.550248	0.0373762	12.3031	28.6573	25.9513	7.54564	0.203266	8.38677	10.6504	6.8498	2.24035	11.5621	7.6738	16.9505	72.4686	6.27508	0.246731	34.0399	2.07385	0.0710084	17.4074	0.955846	29.8072	12.1118	6.92715	3.59318	72.8536	0.533913	0.304453	0	4.67337	0.0244386	2.26389	11.7881	4.57756	9.72875
TCGA-DU-A5TW	762	0	863.778	4.33401	12.6259	29.7621	15.0274	2.03878	1.32774	12.037	0.0649105	0.134084	0.0776927	0.613645	0.0292033	10.7686	45.0315	23.4197	3.50934	0.0690516	12.9355	7.75101	5.93691	2.23484	16.7087	5.50919	18.4213	30.0869	14.9796	0.532108	3.45651	5.93386	0.0480128	9.28669	2.58224	25.6977	12.3086	7.33207	2.48098	40.4997	0.574236	0.0831747	0.0194693	1.12353	0.211512	4.19818	7.83353	10.7814	6.67689
TCGA-E1-A7YO	2284	1	296.517	7.39592	12.2195	27.8477	9.60835	2.42346	0.541226	1.97283	0.102407	0.130978	0.0653388	0.982558	0.0579944	9.21056	26.5353	29.2051	6.7449	0.164554	7.35929	17.0013	10.6447	1.99963	8.5118	6.84973	16.1702	26.4883	6.38506	0.69061	37.3567	0.798763	0.261676	28.2649	0.739016	26.5521	7.82555	6.6799	3.15085	52.5575	1.53334	0.579764	0.0558477	0.313913	0.333696	2.56461	7.75268	12.3689	6.5795
TCGA-FG-7638	688	0	323.04	3.17452	17.5471	25.1654	11.4418	2.57959	0.589115	2.69477	0.0270228	0.0754326	0.0117615	0.437641	0.0112224	7.76603	26.9825	24.5485	3.29719	0.101719	8.64195	12.5848	7.09074	1.17952	8.61588	8.28236	21.4591	51.854	5.32191	0.294151	31.8667	1.2807	0.119929	26.6645	1.07008	25.0349	8.19868	6.76553	2.50924	53.7014	0.379682	0.26316	0	0.103266	0.0782702	2.76552	7.91249	4.8353	8.56316
TCGA-HT-A5RA	834	0	287.454	6.03141	14.5417	21.0843	16.4467	5.71135	0.686623	12.7464	0.0850377	2.36745	0.00462651	0.129594	0.0627833	12.0634	35.121	14.7623	8.48153	0.0324738	21.148	20.598	5.01677	2.10296	18.1449	7.80008	20.1787	1.46874	40.5624	0.914232	23.3783	4.33133	0.0279557	9.7744	4.38126	43.867	15.347	10.8892	3.01873	31.3038	0.427774	0.0290574	0.0113361	0.452405	0.0102628	3.28377	4.20869	7.45846	11.9345
TCGA-DB-A4XD	1212	0	408.8	5.51787	11.0582	26.1831	15.9356	2.63607	0.716597	11.4423	0.0219136	0.106437	0.0536498	0.832903	0.0295769	7.16033	49.2208	21.5744	5.808	0.0645552	16.5628	12.4545	7.673	1.92249	17.7823	7.41502	16.2795	42.5454	3.08926	0.123685	19.5701	4.63994	0.0378209	8.42708	2.06942	35.7766	8.15875	6.78061	2.79387	58.7181	0.915135	0.0673909	0.0262911	9.24358	0.101158	2.71441	9.71356	7.94316	7.90093
TCGA-HT-8013	1935	1	518.096	4.535	12.1255	21.0829	14.2365	3.05316	0.38142	41.0471	0.0286294	0.0647332	0.011682	0.495829	0.029724	9.65029	42.9442	17.3554	3.38244	0.0386556	14.4974	21.0318	7.34753	2.56116	15.361	6.68518	13.4644	24.4425	6.45431	0.389549	5.30909	8.70252	0.0388236	8.59192	13.8865	30.7967	43.5907	6.65509	2.79963	48.1277	0.983294	0.0770386	0.137394	0.0482672	0.0932893	3.50542	7.56979	9.31515	7.61738
TCGA-DU-6401	2662	1	466.003	4.43543	12.1909	29.6618	12.2031	1.77191	0.707501	5.3002	0.00811328	0.010871	0.0105938	0.513014	0.033694	8.99611	50.3723	28.5108	5.45907	0.0796697	16.8586	9.56325	9.21727	1.89691	15.3049	6.51848	13.5291	3.57073	11.6603	0.17336	4.87012	5.26555	0.0240048	8.86461	2.09201	28.1834	15.1414	5.637	3.49052	55.5182	0.696638	0.137229	0.0146011	0.257155	0.0396558	2.74909	9.19262	4.51638	7.31446
TCGA-DH-5141	970	0	422.948	3.13226	28.349	30.4191	11.9131	2.46601	0.534625	2.88516	0.0148793	0.0672863	0.00607136	0.252504	0.0108137	8.95777	27.4947	33.2907	3.88067	0.0328747	8.46018	14.3966	5.19574	1.85195	9.1171	6.12081	22.1813	69.3162	5.19297	0.131972	20.3568	1.9286	0.0623665	19.5475	0.566127	36.1597	23.0561	7.75536	2.44224	66.9271	0.923352	0.0743572	0.00892582	1.77103	0.0161614	2.99424	10.8886	5.26759	9.67041
TCGA-HT-7477	740	0	872.898	6.37136	14.0938	36.8047	18.7137	1.22988	0.716214	9.42767	0	0.211784	0.0600671	0.912568	0.0685807	5.52776	51.8957	30.6999	2.34032	0.0463314	13.6358	49.0249	4.70992	2.29191	21.4478	7.22794	20.2254	18.2186	7.67886	0.821747	12.6794	2.75853	0.209397	21.2486	1.66862	35.9921	11.1369	7.63359	2.30149	39.7667	1.33323	0.0870597	0.0113215	0.0827278	0.0614975	4.75507	5.03984	12.565	6.93704
TCGA-HW-A5KJ	621	0	815.224	3.46234	15.6934	23.8524	7.25721	1.14151	1.28143	0.210597	0.00950324	0.0445667	0.0124087	0.474978	0.0256531	10.4484	22.4676	32.6607	1.62899	0.00933186	12.1901	17.3694	7.21774	0.636586	6.24608	4.32122	33.8499	5.22921	4.72899	1.04595	12.9552	0.524161	0.117155	26.0583	0.150875	30.5867	7.617	6.41126	0.938095	32.7645	0.511845	0.241109	0.0114016	0.480654	0.443852	5.18672	5.86406	7.4582	5.55081
TCGA-P5-A780	74	0	461.026	7.68645	14.2292	32.535	13.0039	1.32757	0.525802	12.1611	0.00814002	0.070894	0.107615	0.959394	0.040566	9.27673	47.8147	18.7504	3.83624	0.0279763	15.8154	22.2935	8.27858	2.37456	15.1237	5.61576	17.1957	41.2142	4.35201	0.144396	8.67029	3.96592	0.0883078	11.3076	2.91886	25.8323	18.564	5.04587	2.24875	35.4973	1.01028	0.0625826	0.0146492	0.109788	0.0839938	2.89318	6.39796	6.9411	7.3848
TCGA-E1-A7YM	650	1	298.922	3.48134	17.8809	18.3201	16.9921	5.04108	0.784719	6.65639	0.0533994	0.196761	0.0156882	1.13461	0.0399176	12.577	32.5213	15.9763	2.52588	0.0157309	15.0676	17.0045	4.66422	1.51389	12.1272	4.38436	30.8186	151.365	6.14404	0.869749	7.18596	5.0201	0.100062	24.9662	3.85299	27.0966	7.40848	6.79682	2.29613	26.2031	0.516863	0.0164219	0.0704734	9.4277	0.0348005	5.11736	5.75012	8.77148	10.1351
TCGA-FG-8188	457	0	535.476	4.73627	12.3047	20.0567	19.7665	3.31027	0.744085	14.1608	0.113771	0.156252	0.0464231	0.814601	0.0614228	8.14905	48.3282	17.5781	3.88804	0.0391017	15.8162	12.7434	6.19278	1.70122	15.159	7.30812	11.7789	67.9844	6.24468	0.0137603	7.16561	5.11076	0.022441	11.2422	1.91212	35.4811	13.7943	6.7351	3.47441	52.2336	0.630532	0.026241	0.0204747	1.85672	0.0556085	2.80615	6.90041	6.47369	9.04797
TCGA-P5-A72W	319	0	1059.93	3.11072	22.4856	22.1846	15.4399	3.45957	1.0058	9.23491	0.154423	0.0344851	0.00840146	1.19901	0.0833703	8.50747	64.5265	26.9711	1.88978	0.0758192	15.4356	15.0616	4.55835	1.07224	9.73378	3.29352	54.5736	18.256	1.56193	0.190922	4.23801	6.5426	0.060919	11.6819	1.70206	38.5397	10.3494	4.29696	1.62551	31.7059	0.329475	0.134554	0.00617572	0.0138852	0.201276	4.75371	5.28127	4.91843	11.8166
TCGA-QH-A6XA	504	0	418.168	4.48056	15.6991	23.5128	16.9985	3.18684	0.73663	14.0705	0.0475161	0.0254667	0.0201641	0.974256	0.0493329	8.60668	45.0333	21.918	2.97961	0.130646	14.3865	12.8089	6.59457	1.47031	14.0319	6.76618	19.6254	72.4543	3.62425	0.260529	19.8571	7.11111	0.0374897	14.274	2.79898	27.6301	16.291	6.69107	2.28482	45.4668	0.563771	0.0876758	0.0513074	0.128174	0.0309664	3.17353	6.54216	5.9737	9.64722
TCGA-S9-A6U2	721	0	256.778	3.27752	6.64865	22.6452	10.7242	2.32349	0.523081	7.41379	0.0196313	0.0854875	0.022429	0.214491	0.0142673	9.15442	26.6526	17.9023	4.97947	0.20723	8.31426	20.456	6.73637	2.83367	9.55547	8.40774	14.184	55.8808	6.22373	0.261179	43.6815	2.86938	0.121007	10.8734	2.14407	29.6523	8.44245	7.23047	3.63747	57.2953	0.735542	0.60372	0.105988	0.397164	0.0533072	2.20748	8.5374	7.08162	7.94066
TCGA-TM-A84H	928	0	474.212	7.04226	5.68125	27.0671	12.6711	2.13829	0.594112	10.3918	0.0167228	0.151246	0.0887065	1.71051	0.0677125	9.86506	34.0328	18.5416	5.87275	0.205265	10.1107	3.25776	7.79573	2.46443	10.7763	4.92203	19.9933	11.269	4.74529	1.56413	20.2143	4.87827	0.131941	9.12865	2.47641	23.5476	6.7089	5.83961	2.96712	32.2769	1.26619	0.186425	0.0501585	0.439818	0.24067	4.17015	4.12894	11.6856	6.01542
TCGA-DB-A64P	918	0	343.574	4.4929	11.2276	31.224	13.3168	3.15964	0.827943	7.45944	0.124581	0.083463	0.0265902	0.891114	0.0537278	15.1106	33.3317	33.4339	3.61185	0.211733	7.97834	15.7207	8.36443	2.95293	10.2529	8.02639	19.1783	43.248	3.66962	0.455898	34.5576	1.75603	0.10869	22.9191	1.73129	38.6798	116.087	7.37112	2.9443	60.9901	0.987419	0.235769	0.0229951	0.601025	0.0520448	3.36963	8.7367	7.57238	8.24896
TCGA-HT-A74O	5	0	1012.1	2.52631	17.0117	20.8039	13.1323	3.71165	0.496753	15.64	0.0878892	0.186457	0.0334716	0.783205	0.0223055	19.5379	85.3648	21.768	2.08713	0.110278	15.1509	20.9037	3.6898	1.55308	9.08532	3.28801	26.4591	27.0118	1.07708	0.0590555	2.85328	10.9999	0.0481552	11.4184	6.48486	48.7048	282.351	5.06472	2.67296	32.3487	0.876615	0.0300318	0.0117163	2.41032	0.0424279	5.19706	4.67712	8.00212	8.35365
TCGA-TM-A84B	760	1	244.332	7.24513	20.4665	26.0588	18.1394	1.95924	0.473953	3.07352	0.293494	0.625844	0.012852	0.392727	0.0312147	7.74814	60.1798	10.5274	4.77306	0.00702929	17.7697	17.3433	3.98305	2.99773	19.779	9.26651	24.1101	3.3399	9.88951	0.352088	7.9604	0.973909	0.091778	10.9148	1.63417	47.1792	2.82016	7.68403	2.9076	32.2271	0.536419	0.0935603	0.0171768	0.144822	0.0233257	2.51118	10.5969	5.81776	6.33397
TCGA-E1-5322	3980	1	467.729	5.17533	16.4427	34.5089	9.1597	1.43255	0.671288	39.0165	0	0.0533776	0.0011308	0.7151	0.0431586	10.375	51.3189	26.4532	5.74254	0.0340163	20.5474	22.3425	8.75308	3.30255	22.8762	7.36432	17.0928	16.1972	4.32117	0.217867	12.2192	13.6039	0.0614955	15.3789	6.33029	28.054	22.6829	8.37462	1.89796	69.6583	0.859876	0.191757	0.0415611	3.15373	0.0978277	3.31971	11.582	5.62139	8.63289
TCGA-HT-8108	78	0	284.962	6.37786	14.0122	25.0565	12.2897	2.62596	0.535961	38.4325	0.0255301	0.0484609	0.0236126	0.640973	0.0406429	6.77484	49.2382	19.8855	5.02251	0.058496	16.8188	3.22296	9.46214	1.96393	19.8187	7.31559	16.8901	19.2258	8.6568	0.373968	6.15804	6.18539	0.0587503	9.28377	6.22888	24.6686	12.8037	7.082	2.82116	59.6348	0.564636	0.0654273	0.0255251	1.31996	0.16638	3.2376	6.36907	5.84047	6.99536
TCGA-DU-7292	244	1	198.197	4.11782	17.7216	23.1873	9.59494	2.56448	0.494655	6.68939	0.064112	0.128855	0.0313924	0.283176	0.00295837	10.9421	44.507	15.6114	3.33401	0.202858	11.884	11.5639	10.3151	1.74863	13.5981	9.40469	28.3315	15.6078	14.2604	1.30098	11.6167	2.03875	0.555014	61.4917	1.20894	19.5897	6.46569	7.20875	3.94082	30.3122	0.383675	0.20264	0.00854659	0.100882	0.263071	2.33043	5.68182	10.382	5.47956
TCGA-HT-7680	25	0	201.149	5.09441	13.5593	12.471	22.2793	5.22011	0.310795	18.0031	0.125838	0.181008	0.050743	0.297696	0.0153705	8.41147	30.2512	15.3399	4.36228	0.134472	21.3163	3.58299	5.26152	2.25531	11.1539	5.68845	11.4792	13.2641	4.79507	0.0298428	18.9459	12.3119	0.0328516	10.9998	5.10195	18.9093	16.9443	6.401	2.9228	60.2763	0.26579	0.00569103	0.00888096	2.55584	0.00402005	1.88213	8.32897	3.96958	8.0462
TCGA-CS-6670	203	0	303.436	3.82287	8.86735	24.0743	12.7753	2.08456	0.593982	1.41512	0.23704	0.101306	0.0253479	0.334426	0.00848632	8.02369	29.4032	19.9736	4.53497	0.184607	6.9316	11.0849	6.11956	1.7627	8.00593	6.5991	21.3183	52.0175	6.40802	0.662364	35.0834	1.68813	0.137042	26.6614	1.18582	29.5563	10.7571	7.10619	3.7093	45.8294	0.267973	0.28279	0.00490332	0.507121	0.062147	2.84517	8.03063	9.27784	7.02214
TCGA-HT-7690	5	0	371.296	5.51124	21.9394	16.826	11.9038	1.99697	0.552946	20.88	0.0352999	0.532105	0.0691383	0.649924	0.107017	10.0787	60.0331	22.9634	3.94152	0.166384	14.8071	19.0608	7.95323	2.63006	20.2524	5.30895	16.1116	28.5536	5.29171	0.418405	7.2867	7.51544	0.167107	28.1847	4.93562	38.7455	25.1884	9.31072	2.28007	56.9414	1.09667	0.0814184	0.00847032	0.566566	0.111191	4.41192	8.95139	8.39825	10.2598
TCGA-DU-7011	3202	1	297.684	4.62267	16.2658	26.7665	15.9436	4.05583	0.67154	29.5274	0.0381512	0.0715661	0.0062269	0.55697	0.0396099	7.78418	47.9459	21.7704	3.42546	0.191062	19.5151	9.08098	10.2643	1.96534	15.609	8.63973	14.9927	24.8549	10.6441	0.369144	6.99782	3.68481	0.0677269	24.9334	7.62757	20.7263	42.02	7.351	3.32857	63.2903	0.244197	0.0821286	0.00457725	0.149223	0.066302	2.55844	8.66182	4.37651	8.45467
TCGA-DU-6408	3472	1	645.28	5.34955	11.9371	29.685	17.6842	2.6131	0.36237	16.1777	0.123198	0.123804	0.0258531	0.321173	0.0438543	8.33303	54.2109	20.5754	3.99636	0.0993734	14.1699	24.3517	5.26334	3.37329	17.521	6.9249	11.3108	28.6963	5.21285	0.429277	18.0321	6.121	0.151878	19.9264	3.97444	28.3324	16.5871	7.61866	4.16429	54.6172	0.879232	0.115014	0.0527888	0.24331	0.124256	3.05591	6.5051	7.24866	8.55681
TCGA-S9-A7IZ	219	0	251.812	4.43162	18.0727	24.8093	13.0324	2.85524	0.60113	14.2728	0.0465309	0.0498772	0.0136703	1.23746	0.0985524	14.7456	37.417	21.5845	2.64321	0.0639685	16.6899	11.0852	7.64572	2.53778	12.545	5.69941	14.442	10.9471	2.38052	0.686592	9.36974	6.21654	0.348767	31.3036	5.71625	30.0181	10.6039	6.27832	3.42501	55.4397	1.12596	0.157406	0.0111652	0.90372	0.313351	3.05459	5.77265	10.778	8.10381
TCGA-P5-A5EX	245	0	311.764	2.87952	9.39559	16.6828	15.957	4.20181	0.500544	20.782	0.0499935	0.710052	0.101181	3.35408	0.440154	21.3201	37.6268	20.6412	4.20887	0.0540012	10.1435	16.3142	6.96386	1.54696	6.2872	4.73385	21.5296	13.1253	6.73848	0.205584	45.4564	15.9748	0.118333	36.8169	8.48442	30.0642	52.0833	8.33635	3.51808	52.1421	0.483897	0	0.0839726	0.748456	0.00543015	3.61906	8.97499	4.83865	10.5177
TCGA-E1-A7YL	494	1	312.875	4.24031	15.269	20.0798	11.8749	4.05518	0.621039	6.18337	0.0668827	0.484486	0.0136454	0.680229	0.0434	13.5599	49.1433	10.9786	9.15177	0.0123144	14.6606	15.5798	6.82873	3.22287	11.8033	4.61982	21.4733	17.3509	9.97425	0.74152	10.8857	6.30714	0.0535942	10.7685	14.9298	33.2358	45.6644	9.65661	2.73288	19.1477	1.18119	0.0642764	0.0300913	12.2401	0.0499441	6.07028	7.43432	9.42226	9.71621
TCGA-DU-8164	653	0	224.49	7.52421	16.1597	31.3981	11.1599	1.26851	0.468639	4.19601	0.0329776	0.258491	0.0193769	0.576501	0.00684769	8.13384	29.5516	22.0196	5.51687	0.123055	7.80514	20.9891	11.0852	2.39147	11.3732	10.0854	14.2962	37.2136	7.25058	0.566376	43.7459	0.695229	0.24718	32.4755	0.548832	27.2691	19.8745	7.84642	3.112	59.9409	1.45698	0.258611	0.0395653	0.0400305	0.20417	2.69038	8.32327	7.35715	8.61285
TCGA-FG-A711	1331	0	326.777	3.60757	17.1542	21.0044	12.0204	3.20865	0.569799	5.92873	0.0557124	0.0715385	0.0560746	0.498628	0.0289213	9.713	44.3335	24.977	2.23637	0.123092	13.3262	7.7221	7.16166	2.07867	10.7227	6.23717	23.8288	83.6932	7.69779	0.591472	11.5317	4.35325	0.155679	30.8895	2.25191	35.2799	8.09677	6.21634	2.90648	30.3354	0.485617	0.214166	0.0167105	0.306829	0.126069	3.89872	7.05979	7.76825	8.19432
TCGA-HW-7495	133	0	263.234	4.34423	13.7351	22.1258	13.8769	1.53619	0.474295	3.61181	0.124602	0.140122	0.0276004	0.502768	0.0277214	8.84941	23.9156	20.6428	4.74292	0.218492	8.63955	8.12203	8.15357	1.71548	9.79581	7.93718	18.4976	144.404	7.44294	0.76787	46.5142	2.01268	0.394994	47.7671	1.1304	24.7943	5.79607	7.64573	4.03275	48.3871	0.472416	0.287392	0.0213562	2.26877	0.203009	3.03507	7.34903	8.04554	8.25286
TCGA-HT-7860	17	0	167.105	6.25013	17.0017	18.5017	17.3056	5.30668	0.362704	26.008	0.0415932	0.454203	0.00407321	0.257198	0.0224554	7.87275	29.5806	9.67404	5.61529	0.0490117	8.7582	18.0915	5.25355	3.23555	18.9873	7.96758	12.4697	3.92884	20.4305	0.154272	7.75466	7.79489	0.114858	10.028	7.4049	28.6844	15.9625	8.26772	3.66541	38.9748	0.870111	0.147098	0.0099804	2.80493	0.049695	2.7689	9.71083	6.36776	7.67471
TCGA-TM-A84C	494	1	269.015	4.8418	12.5595	21.7973	10.2925	3.00934	0.477556	18.6995	0	0.217688	0.0262192	0.256315	0.00606483	21.7927	30.8915	21.4241	3.93554	0.043021	14.7596	13.8913	5.98507	2.64442	19.7464	7.99631	21.5774	5.32004	16.6685	0.238448	15.7664	8.66789	0.0288054	15.2794	5.78027	21.4518	15.611	7.19681	1.83151	32.6793	0.740959	0	0.0219013	0.05909	0.00396553	2.28352	5.94442	3.96669	9.31075
TCGA-DU-A76K	349	1	238.649	2.99307	15.7776	16.9922	13.0225	3.76717	0.755228	1.1907	0.618977	0.184303	0.023573	0.271797	0.0414148	9.39415	31.0235	13.5968	1.41618	0.0844187	9.35809	10.9183	4.00848	2.04194	10.3096	5.80835	30.2997	15.8853	14.3591	0.848457	7.47559	1.54685	0.28488	44.2232	0.561003	31.1834	5.74603	6.54766	2.91276	19.5045	0.252318	0.417721	0.070137	0.236539	0.440739	3.7817	7.54337	12.3364	4.23776
TCGA-S9-A6U8	2990	1	311.758	4.70634	13.2257	20.6231	14.8911	3.86296	0.454736	23.3215	0.0234661	0.0838456	0.219589	1.06375	0.095829	9.59044	38.5905	20.6734	3.30789	0.115215	14.7244	14.2844	7.01399	1.70374	13.1902	5.63918	21.2451	97.8682	3.42255	0.274356	15.2613	7.18095	0.0925723	14.345	3.95675	33.1385	18.6291	6.27913	3.38873	52.7734	0.726582	0.0902066	0.0797691	1.04444	0.0212401	3.2779	6.94083	7.5769	8.95207
TCGA-S9-A7IQ	1101	0	199.621	3.46746	20.2562	26.2006	7.60875	1.62181	0.34946	2.06361	0.126856	0.0574911	0.0377562	0.340002	0.00619795	14.0257	26.0931	25.1607	2.79786	0.509265	7.99403	4.74241	10.9051	0.96102	6.43208	8.49527	33.2779	32.6831	6.85086	2.23526	21.7937	0.850601	1.67426	122.404	0.812947	22.9233	2.16052	8.07561	4.10052	30.2288	0.372787	0.780241	0.0850515	0.241548	0.818619	4.12344	4.7276	17.7552	6.20876
TCGA-S9-A6TZ	875	0	291.723	6.66728	13.9625	23.6463	13.2582	4.82952	0.407358	19.3452	0.0166322	0.0519992	0.060627	0.860929	0.0287802	7.70399	35.5889	22.746	5.88964	0.171488	18.6397	10.7975	10.2374	3.31842	13.008	8.27444	16.267	22.3419	4.94924	0.5789	41.2641	4.36258	0.0601452	12.3438	5.19611	27.0607	12.2059	3.81184	3.63224	49.3276	1.20307	0.153447	0.0332578	1.56654	0.0662396	3.03641	11.0183	7.59939	7.87521
TCGA-DU-7300	1888	1	293.923	4.93759	10.6918	26.7126	10.6485	1.81964	0.551688	6.61397	0.0375418	0.0754531	0.0281862	0.315927	0.00779544	10.0285	33.6778	26.3688	3.65747	0.154832	12.7032	13.2636	12.9946	2.01832	10.6763	8.43243	19.0121	28.1706	3.22504	0.675035	30.139	1.78537	0.28139	45.8634	1.15504	24.9691	9.671	7.58652	3.79787	64.3804	0.451288	0.380993	0.0135124	1.35194	0.391457	2.27459	6.84312	7.98646	7.36371
TCGA-E1-A7YJ	594	1	316.025	4.45761	13.9972	28.8056	10.3727	4.78242	0.531131	10.8623	0.00764886	0.174227	0.0312105	0.572553	0.0682953	15.9137	36.6356	16.851	4.15908	0.105153	14.5526	19.6427	5.73142	2.88248	11.859	5.05873	31.9877	48.1808	20.952	0.206608	11.4752	9.29544	0.10561	18.5701	10.4224	42.0562	22.6069	7.14766	2.81859	26.4592	1.42099	0.0529257	0.0412957	12.6272	0.0290779	5.3956	4.12647	10.4948	10.589
TCGA-DU-A6S2	779	0	237.521	3.89255	13.2387	19.0698	9.72716	1.23548	0.260237	1.6718	0	0.0920857	0.0185664	0.680934	0.0393676	10.4379	20.8451	18.2067	4.93439	0.563165	6.12527	9.6441	10.1387	1.42976	7.47481	7.53658	24.1598	66.7926	6.86467	1.22295	27.8034	1.93454	0.77129	51.515	1.52573	20.9474	5.60992	5.58235	2.91243	36.3224	1.14692	0.444571	0.0568656	0.49863	0.417	2.82532	5.8827	11.2585	7.00034
TCGA-HT-A619	589	0	686.386	3.78032	7.37234	37.6425	8.25952	0.122088	0.647157	0.890082	0.0324932	0.558731	0.0919259	0.309699	0.0134942	7.06624	30.1555	34.6503	7.66846	0.0797681	9.45133	16.6046	12.9668	2.34043	13.134	7.92057	20.7451	1.58551	17.877	0.916994	19.4007	0.477919	0.112161	16.7064	0.219391	38.9415	3.58655	9.51709	1.7928	60.2132	1.17518	0.241489	0.00649736	0.116867	0.0529397	4.17069	7.18986	8.63692	7.19862
TCGA-RY-A847	935	0	303.479	4.08456	13.3527	22.607	10.2348	1.86151	0.673273	13.8788	0.0758039	0.0544121	0.0247449	0.400271	0.0112432	10.5408	22.8214	21.2918	2.65282	0.308382	9.09019	15.3488	9.39677	1.404	7.54499	7.4104	22.8764	50.8562	3.60841	0.681074	39.5342	6.30475	0.309722	39.4277	4.19734	27.5634	13.2311	7.52393	2.70374	44.2479	0.625523	0.241446	0.0194886	0.445475	0.164672	3.54269	5.25387	8.10057	8.01513
TCGA-S9-A6U5	994	0	322.939	2.99364	15.3106	20.4981	10.4324	2.91135	0.661014	7.19324	0.0348366	0.0904374	0.029851	0.376575	0.0108506	12.3899	26.2204	22.175	2.91016	0.329256	7.38558	14.4179	5.97423	2.11151	6.5556	6.83647	23.8752	44.6689	3.60326	0.273871	26.1709	4.70221	0.0858927	14.2111	3.29458	34.9629	15.7136	6.0285	3.29387	46.093	0.890563	0.133916	0.0417957	1.61513	0.0141894	3.34414	7.40317	6.17113	9.15832
TCGA-HT-8011	496	0	496.498	7.24706	20.4923	25.4006	13.8979	1.83052	0.800126	5.90426	0.00780275	0.878209	0.0509415	0.13967	0.0842513	15.5294	89.5935	11.5202	3.11858	0.0689584	14.3811	23.4424	4.20746	2.64373	23.984	8.35065	22.9029	6.84766	40.4522	1.06012	9.61084	5.79085	0.130821	17.984	2.00767	33.4975	21.008	10.0726	3.53009	22.0737	0.596887	0.101982	0.0374459	1.32601	0.101701	3.33772	10.7515	9.5038	9.62094
TCGA-DB-A75O	937	0	409.241	2.5608	11.4608	17.4243	10.6989	5.57626	0.385972	9.83366	0.0222337	0.070753	0.00725779	0.599559	0.0092335	11.0534	32.8416	16.9752	2.30841	0.0873308	10.6574	3.47775	3.86422	2.29648	8.59753	3.90467	36.2548	56.3339	2.7487	0.358548	33.4218	10.9006	0.0383733	11.4439	5.1487	28.1388	34.9239	4.20934	2.67277	25.2828	0.425202	0.367517	0.0200064	2.04665	0.144897	4.06004	5.91627	6.1048	6.95021
TCGA-DB-A64U	848	0	291.436	4.48655	8.63247	23.3003	14.7043	2.00972	0.78722	6.13913	0.0541648	0.19051	0.0191546	0.858326	0.0262433	9.64198	25.6125	22.2356	3.94106	0.186158	7.4047	17.6426	8.01731	1.86877	11.2162	7.40695	19.6471	153.622	7.02351	0.50953	34.1293	2.08573	0.0934836	15.3693	1.42333	31.7903	7.31998	7.48928	2.81322	50.9863	0.97244	0.166573	0.0270771	0.00608787	0.0392214	3.65539	8.03242	8.03462	11.6408
TCGA-WY-A858	1339	0	496.8	3.16562	16.1005	21.6988	13.3892	4.43796	0.946083	33.7052	0	0.237051	0.022722	0.949308	0.0698593	11.4392	38.3457	21.2343	1.42726	0.0797436	20.1953	8.70302	5.18105	1.12807	9.70691	3.52001	23.4979	51.6966	5.49362	0.219824	14.2043	10.0247	0.062928	10.1638	7.6086	24.2627	25.5512	6.12464	2.64439	38.8418	0.742562	0	0.153105	1.61164	0.0378025	4.48615	5.16749	5.7449	8.34619
TCGA-P5-A5EZ	72	0	407.348	3.66425	11.3878	23.1191	14.0666	2.07536	0.487133	16.142	0.0377069	0.113677	0.0200017	1.05188	0.0704674	10.1203	44.2229	18.6434	3.10698	0.0740538	30.3447	4.34773	6.79054	1.91068	15.6496	5.17218	19.0002	82.4722	4.45173	0.345842	8.48394	4.88744	0.0790242	11.0859	3.61764	25.2274	16.7681	4.32904	2.54101	38.0645	0.581307	0.0217425	0.0169648	0.0699283	0.168944	3.68119	6.33152	5.12355	7.92528
TCGA-E1-A7YK	380	1	347.681	2.74994	9.43544	16.5237	13.1868	3.94359	0.346608	22.7992	0	0.126539	0.121912	1.45696	0.126574	20.6558	39.4664	21.0166	2.975	0.0843061	13.755	13.5717	5.69806	1.62514	9.98532	4.11036	25.1246	156.279	3.61876	0.3219	10.048	7.23988	0.0211681	15.8969	11.4918	26.9335	45.6984	6.11139	2.83028	36.7176	1.00524	0.0396042	0.0463522	4.13969	0.0279757	4.82354	5.5785	5.32073	10.4426
TCGA-HT-7475	532	0	905.852	4.87687	18.5161	29.8209	16.6451	1.74234	0.654723	3.02211	0.0442292	0.0938323	0.0372978	0.498672	0.0122454	9.1558	51.7049	20.1537	3.47247	0.220777	10.8151	14.8844	7.44539	1.3635	13.8482	6.91203	20.9552	36.2829	8.83465	2.39832	9.33672	1.72573	0.392584	50.9456	1.21067	27.2357	2.90414	5.29681	2.42158	39.4492	0.684736	0.277704	0.00442206	0.0745674	0.384324	3.60631	6.77221	11.3271	7.04725
TCGA-DU-7302	1836	0	193.011	6.47789	16.3147	26.0547	9.49873	1.67334	0.444615	4.23833	0.00821869	0.0633201	0.01878	0.420328	0.00682634	9.67407	27.092	23.5799	8.20493	0.476158	8.56406	10.9794	16.0971	1.86828	10.7169	12.3422	18.6563	30.5985	5.79634	0.841613	44.9468	0.926768	0.453912	61.6122	1.09334	21.1511	3.6496	8.23632	4.34907	63.0076	0.288691	0.676105	0.0295815	0.0942218	0.343685	2.50096	9.23874	7.87069	7.48638
TCGA-S9-A6TX	1051	0	488.654	3.08628	14.5067	23.3235	11.2125	2.02941	0.565763	3.17503	0.017301	0.115908	0.0663597	1.1362	0.107775	12.216	23.2508	24.6126	3.30914	0.0297308	8.64395	15.5461	5.50721	1.37576	6.30502	4.79469	21.5898	80.0867	4.53536	0.561493	20.0843	2.10997	0.162098	19.0927	1.26445	34.4599	8.97541	4.90205	2.1198	40.9975	1.30322	0.0931104	0.0155679	1.07923	0.0610736	3.89562	8.58318	8.7695	10.0477
TCGA-S9-A7J1	251	0	181.657	4.50031	7.65869	21.6207	12.9946	2.42307	0.341674	7.73276	0.0393637	0.121969	0.0144558	0.807559	0.0653901	9.65479	18.8485	21.1401	5.07558	0.198101	7.88805	11.4005	6.65036	2.07969	8.08053	7.03414	17.418	77.455	4.06643	0.567347	31.6567	2.71997	0.101907	16.4393	1.85867	27.9975	8.30545	6.08498	3.34654	55.0733	1.10616	0.537183	0.029517	1.02201	0.0962003	2.89559	7.66037	6.83574	9.14822
TCGA-WH-A86K	407	0	399.623	3.26481	17.3047	18.7094	17.4729	4.5312	0.97878	8.99788	0.0470762	0.011827	0.0326553	0.563601	0.0684266	10.5421	43.7704	23.1993	2.11442	0.0404488	23.0977	13.4144	4.70158	1.15457	12.3268	5.48644	18.29	20.4044	4.15013	0.22775	5.91751	3.28173	0.0290176	9.01214	2.60297	32.5373	18.3266	6.31663	1.76032	35.8748	0.698188	0.0723867	0.0706004	0.00793672	0.0894823	4.11581	6.06297	5.21207	10.2131
TCGA-FG-A60K	544	0	278.219	5.16998	5.93701	24.8853	12.2649	1.63422	0.624329	6.70331	0.038184	0.169476	0.0436258	0.574758	0.029733	8.03578	21.8063	23.1061	5.67327	0.206225	6.94986	14.7138	8.59938	1.77396	9.97649	8.12873	17.0327	34.4136	4.80959	0.569586	42.7034	2.37519	0.103561	11.6202	1.66186	27.2414	8.06465	8.0674	3.09177	58.3641	1.13262	0.176141	0.0400854	1.2167	0.0259215	3.69143	8.69764	8.1938	8.90914
TCGA-DU-6396	2288	1	372.428	5.88947	12.0716	36.8377	9.17648	2.01947	0.306675	34.8057	0	0.115225	0.0502954	0.87795	0.071427	10.4041	46.8858	22.8278	12.6682	0.316669	16.7198	22.2776	11.9669	4.35137	16.0315	8.11241	6.59065	24.7088	7.4773	0.0808965	29.4981	9.56103	0.0141353	10.3896	13.6136	21.5555	34.1775	6.24881	2.43534	64.4539	1.10759	0.0165289	6.03572	4.02086	0.0739464	3.16487	6.88196	7.6284	6.5589
TCGA-RY-A840	856	0	353.127	4.29758	11.3365	32.6112	13.3548	1.05792	0.805669	2.89172	0.207466	0.0761144	0.00483741	0.672914	0.0102571	13.4346	31.5527	36.0442	2.42444	0.169771	7.40388	19.0665	4.52845	1.16986	6.22122	5.98689	32.1864	21.8106	3.89302	0.430158	34.3707	0.859741	0.0682035	20.2735	0.42727	44.5526	2.85199	6.70583	1.92989	54.1656	0.47041	0.0987414	0.0355587	0.0599613	0.00536533	5.82185	9.7517	8.37121	10.0885
TCGA-P5-A5F4	233	0	445.58	4.31951	20.8375	17.3395	14.4537	2.93585	0.623591	3.15456	0.0214531	0.1042	0.0297628	0.693217	0.0222734	11.6044	33.4241	26.8546	2.66959	0.200129	12.2587	13.6786	7.76786	0.927138	10.2256	7.06124	35.9744	28.4223	9.02585	1.47898	5.53332	1.38048	0.481341	56.3043	1.5679	30.7851	8.16036	6.87086	3.00546	34.1523	0.65309	0.42059	0.0836508	0.173609	0.273796	4.32881	5.36647	17.7262	7.38724
TCGA-DB-5281	2383	0	193.914	5.27249	17.8774	34.7309	11.2964	1.56933	0.594459	10.7142	0.00629259	0.0948533	0.0164328	0.427145	0.0195996	10.9233	49.4137	23.8081	5.45873	0.126672	14.3441	28.0331	12.7433	2.93974	18.4034	7.97856	21.0207	7.99472	4.33855	0.860013	13.1741	3.76769	0.319607	40.409	1.67077	28.4561	10.8833	7.08297	3.88699	54.8756	0.564866	0.154813	0.0113244	0.284318	0.321237	2.22799	7.46476	9.18446	5.27562
TCGA-DB-5275	1460	0	389.934	5.03982	16.4186	23.096	11.6218	1.67488	0.709666	5.67753	0.32419	0.246149	0.0282204	1.06849	0.17652	8.26182	31.9764	22.5791	4.18149	0.0389087	10.7379	19.8278	6.65264	2.94843	14.3407	9.13043	16.909	16.7498	4.69477	0.888761	31.7767	5.29809	0.0888133	14.353	2.16524	31.503	19.2375	7.5695	3.20435	42.9393	0.702936	0.0775431	0.0734687	0.26235	0.14085	3.36773	5.79874	8.37261	8.64222
TCGA-IK-8125	1122	0	309.128	5.78767	16.5955	27.2398	12.2955	2.00724	0.324396	6.16117	0.0401762	0.121122	0.0262296	0.476323	0.00695205	7.60528	27.7937	23.8932	5.22174	0.0558898	8.8296	12.9507	11.1475	1.5916	9.53042	8.94887	17.5599	26.095	10.7035	0.639796	23.9047	1.20236	0.25755	31.4756	1.93552	23.8201	6.93045	6.87988	3.07428	58.5011	0.731751	0.149294	0.0120505	0.0451561	0.272738	2.84063	7.19951	7.67594	7.91623
TCGA-HT-A615	517	0	305.938	5.29801	4.16787	24.9201	11.6474	2.70812	0.757809	21.9463	0.0399379	0.0802689	0.0114074	0.461893	0.0228057	8.05307	27.3448	26.9728	3.91691	0.220599	10.3942	19.544	10.3801	1.87702	10.4164	7.51368	16.7813	36.5323	4.46955	0.579647	39.7058	3.99566	0.142782	23.3069	2.21374	31.7995	15.234	8.72679	3.62387	71.3265	1.29375	0.161203	0.0359371	0.316463	0.0759139	3.10888	7.23238	8.18694	9.12152
TCGA-FG-8181	396	0	139.565	3.74342	25.1195	22.8948	7.51381	1.95236	0.344748	3.02005	0.048336	0.0242869	0.0946706	0.207876	0.00501841	10.6535	22.7343	22.4148	2.84048	0.609125	8.43414	1.37086	15.4272	0.710237	6.84044	8.82217	29.3338	10.6884	17.2262	1.24717	20.1363	2.1575	1.11231	126.079	1.19077	14.7664	4.28188	8.19396	3.69681	26.1899	0.226381	0.476911	0.0918203	0.689958	0.529386	3.72427	3.69724	13.7994	4.52512
TCGA-HT-8114	120	0	287.259	5.81657	9.76255	25.6789	17.2153	2.40963	0.532374	25.0416	0.121202	0.155902	0.0197822	0.84527	0.0442944	9.09372	38.7414	20.7731	7.80118	0.875962	17.4346	3.03081	9.29022	2.76147	15.772	8.14408	12.0357	13.8216	6.82831	0.129	6.47268	6.63453	0.102799	13.3631	7.44475	26.0432	18.2025	7.63334	4.23541	58.5421	2.26303	0.0596373	0	2.64169	0.0684561	2.97165	8.41254	8.91607	8.68804
TCGA-DB-A64O	777	1	165.034	3.13244	19.7835	18.2356	15.9698	6.46233	0.553591	9.57261	0.0663501	0.0740852	0.0288785	0.411314	0.0137774	11.598	23.8754	14.905	2.09231	0.0760125	21.828	10.7341	5.59689	1.96898	9.8212	5.71178	26.9171	49.2831	17.3675	0.267496	4.4779	4.18144	0.163592	26.6707	3.32361	21.6625	10.4878	4.64419	3.09586	26.7553	0.362541	0.0595136	0.0331686	1.95385	0.0420394	4.76944	8.39284	6.91563	8.97925
TCGA-DU-5849	445	0	366.113	4.74129	11.675	26.5482	12.5061	2.298	0.450071	4.12703	0.199566	0.0576289	0.144892	0.497523	0.0214341	10.1575	28.7914	22.2539	3.40592	0.0844688	8.63269	17.3975	8.6022	2.15021	8.4585	6.316	22.1925	54.3074	7.39581	1.28731	27.1391	2.21833	0.498835	42.2958	1.22439	33.0476	9.99724	6.92125	3.68129	46.649	0.714429	0.42326	0.0165126	0.552251	0.272823	3.13457	7.45856	11.712	7.53545
TCGA-DH-5144	246	0	396.879	5.72689	14.3482	32.053	11.2912	1.51779	0.851399	3.18357	0.0227579	0.127055	0.016096	0.433821	0.00787603	8.12326	42.1682	26.5975	4.84914	1.06523	7.22769	31.7132	8.96111	3.89149	10.5534	6.13301	18.2562	51.3314	7.5479	0.226318	23.778	1.64111	0.0785564	16.5706	0.560651	36.7433	6.1125	9.13838	2.89188	73.8375	0.657283	1.03815	0.0227535	0.0255789	0.0700372	2.06706	8.14613	6.48698	7.75416
TCGA-FG-8189	687	0	110.162	4.50202	20.6933	24.7359	7.43937	1.88908	0.197905	2.21792	0.00980417	0.0295573	0.0256032	0.353269	0.0162864	10.8764	22.0181	22.2721	3.22075	0.370654	7.91885	1.59205	16.8494	1.05079	8.08184	11.6798	25.6029	22.1378	10.1433	2.97238	17.9551	0.739038	1.84682	131.865	1.1164	16.4909	2.38909	8.57932	4.15905	31.0879	0.382647	0.761307	0.0646948	0.15868	0.905165	3.87125	3.42899	20.7385	4.70445
TCGA-DU-6392	6425	0	478.854	4.96561	16.299	27.3138	5.76697	0.950059	0.361211	13.6103	0	0.868712	0.00529101	0.468736	0.0121164	9.30561	71.7218	23.5935	3.79267	0.152796	17.9482	15.6139	5.13675	2.8832	27.9989	6.9133	29.2061	37.7884	8.71029	3.1889	14.9762	8.5983	0.0863215	23.316	3.23348	30.009	20.7203	7.31788	2.89574	52.3173	0.465597	0.104677	0.00777859	3.03871	0.257037	3.58263	7.06381	7.45486	7.8902
TCGA-S9-A7R7	3002	0	233.273	5.69001	13.0904	15.1123	9.79917	4.38227	0.235662	31.4467	0.0121611	0.31367	0.0833651	2.17118	0.209592	19.6708	41.7286	20.0455	3.94223	0.376165	19.6391	11.7035	11.0945	3.86289	15.8855	5.99907	12.9924	30.4199	6.98671	0.107862	3.57058	8.63785	0.0179905	13.236	11.6841	24.2122	29.7272	8.57498	4.16083	62.0913	0.873327	0.00934973	0.0802473	1.67302	0.0198135	3.15496	10.3079	5.89813	8.91968
TCGA-HT-8564	480	0	198.184	5.14801	15.433	21.7488	7.81015	2.75314	1.46464	17.714	0.0167184	0.243609	0.241491	0.65293	0.138861	10.4239	39.1343	16.4959	3.27387	0.279087	10.774	13.1664	10.231	2.182	13.4937	10.1477	20.209	28.2598	13.6196	0.674016	25.496	3.43746	0.416328	49.131	4.61745	22.9287	11.1502	5.99784	3.31997	31.6825	0.580727	0.295631	0.085247	0.0845581	0.208829	3.54847	9.29952	12.7707	8.10038
TCGA-QH-A6CU	453	0	387.092	2.19123	14.3576	12.864	14.4838	3.71085	0.909177	7.83279	0.173232	0.108803	0.0212057	0.515971	0.0472121	11.6236	19.1868	20.8027	1.38606	0.122265	10.273	7.6392	3.505	1.06683	6.44528	4.26915	33.0677	178.692	2.15565	0.0960301	13.6472	5.44756	0.0480509	15.6421	3.00513	30.221	14.0742	5.8334	2.12002	34.613	0.245089	0.0665926	0.00649493	3.0739	0.0352799	4.70205	6.7131	3.90855	8.549
TCGA-DU-6393	1587	1	484.936	4.89895	7.57961	31.0701	10.3708	0.65289	0.442165	1.81144	0.493458	0.348733	0.0687541	0.584758	0.17619	9.31646	28.4835	26.9326	8.22616	0.304327	5.8978	21.0987	8.89394	3.75021	9.35227	5.50803	24.1988	23.1993	3.60376	0.715706	25.9153	0.759722	0.112764	18.1182	0.536996	36.1135	4.26131	7.4793	2.8714	54.5367	0.812645	1.64245	0.0288797	0.787296	0.0686315	2.89002	11.0001	9.70564	6.50511
TCGA-TQ-A7RP	916	0	224.284	3.70711	15.0553	17.3995	17.646	6.11195	0.299997	6.50799	0.297235	0.134414	0.0278954	0.616698	0.0678921	15.133	50.745	13.3167	1.67362	0.0474298	15.5375	5.12735	5.8614	1.05013	11.1016	4.27661	26.3374	99.7383	9.15589	0.0509291	9.93764	5.79722	0.0439716	21.2397	2.99409	28.621	14.3726	4.99398	3.54738	25.5378	0.446632	0.0399914	0.0579496	11.6911	0.0242136	3.20694	4.05507	6.72134	8.56153
TCGA-HT-7476	201	0	452.212	4.37225	24.2243	24.6829	13.851	2.42406	0.474332	7.42743	0.0251767	0.267062	0.0205462	0.44286	0.0226541	7.5312	39.861	22.7139	2.55115	0.123613	11.9907	12.2649	9.02394	1.49789	14.9491	7.28942	21.6661	18.7916	14.4709	0.47706	5.71345	3.68249	0.211056	42.3757	2.85769	23.2198	8.5079	6.51143	3.04402	41.1471	0.301337	0.406486	0.0201374	0.118849	0.232442	2.70439	6.72095	13.7672	7.19858
TCGA-DU-5853	409	0	314.483	6.51714	11.0391	24.6842	11.9553	3.2758	0.523071	26.2879	0.0767155	0.0942248	0.02226	0.743079	0.0707988	7.95443	47.6989	22.1222	5.37472	0.54825	13.4594	11.3828	7.83333	1.98556	17.3081	8.38114	11.2284	37.3216	6.837	0.336777	17.0479	5.33878	0.0714562	11.1515	5.64641	27.1339	14.1635	7.72323	3.58838	64.1701	0.592173	0.144175	0.0204535	0.195443	0.0925845	3.17335	7.30794	6.55695	9.06325
TCGA-DB-A64R	957	0	256.661	5.86249	13.0374	26.0797	9.16563	1.46304	0.680034	3.00413	0.0346116	0.239609	0.0451935	0.927984	0.0239567	7.88264	26.0451	23.6257	4.67124	0.203925	6.9755	18.3157	8.93882	1.91464	10.6754	8.17563	17.18	36	2.8646	0.604673	26.5794	1.91611	0.244636	19.5936	1.37059	31.2261	4.69221	7.95034	2.43511	54.1932	1.17074	0.638647	0.0484468	1.16706	0.0751882	3.3947	8.3353	10.9868	8.76667
TCGA-HT-7604	3727	0	854.139	6.19487	14.6189	30.5718	22.0134	1.31089	0.709296	18.2356	0.0559018	0.0535018	0.0208551	0.425135	0.0182409	9.31661	56.8778	24.7177	4.52087	0.0470518	18.7088	12.2305	13.3891	7.01993	20.0681	12.0932	17.5036	11.656	1.99319	0.148102	11.968	2.8484	0.0354422	9.39826	1.98486	31.3877	8.08248	7.41731	3.25482	58.1692	0.829082	0.104377	0.0574877	0.0430842	0.0824042	3.41827	8.77424	6.33818	8.25108
TCGA-DB-A64Q	184	0	219.524	5.68586	13.0935	22.3507	12.2636	1.48426	0.958148	4.48497	0.160903	0.306546	0.0229792	0.930444	0.0501165	9.10216	24.4539	27.7556	5.83042	0.128376	9.6136	15.8345	8.44457	1.96877	10.4592	9.0977	20.1586	33.9784	3.22075	0.421651	33.4981	2.99523	0.094221	19.0442	0.897384	27.5678	6.63446	10.4261	2.65728	59.7329	0.463141	0.239681	0.00603267	2.67202	0.0382305	3.56611	9.82864	6.94764	10.8338
TCGA-FG-A713	624	0	237.57	3.18677	16.6836	20.7959	9.60191	2.00774	0.204072	3.28328	0	0.0496293	0.021337	0.646298	0.0253357	14.2746	25.5487	19.2003	2.18792	0.346601	8.04431	6.09946	11.0691	1.1111	6.52418	7.24582	37.6664	96.9384	5.18303	1.68654	25.4197	1.15367	0.975562	88.4538	0.982862	22.2681	3.29291	5.05577	2.84284	29.3409	0.612264	0.562841	0.125475	0.21746	0.279253	3.53133	5.43199	13.1415	6.48839
TCGA-FG-6691	105	0	372.033	7.33942	12.9061	28.263	13.5781	3.08773	0.42716	47.5373	0.024417	0.0845168	0.00398525	0.450309	0.0118303	9.10976	49.7194	17.3606	5.75539	0.0559456	15.3131	12.5198	7.7231	4.02393	21.6256	6.58238	10.4165	26.8614	3.33155	0.114846	7.67018	14.2106	0.0441483	7.93281	7.00884	24.1365	15.9288	6.77322	4.41226	116.966	0.470133	0.118892	0.0146473	20.7858	0.0442017	2.57188	9.78711	4.73604	7.08743
TCGA-HT-7620	436	0	182.621	4.4304	11.4777	17.2254	20.0814	2.32944	0.334272	7.91183	0	0.200716	0.0551233	0.866162	0.0429822	8.78711	21.2491	16.2188	3.1109	0.0213962	9.35138	11.3438	8.48252	1.73736	10.5908	5.33165	17.8429	338.464	8.96129	0.259142	34.9638	2.37022	0.118191	22.5954	3.39366	28.7237	7.7794	6.06114	2.09798	47.204	0.773872	0.29316	0	0.0587759	0.0946667	2.43531	5.4299	5.13475	11.3982
TCGA-HT-7471	6	0	392.999	6.29786	17.5931	28.4529	9.18811	2.023	0.539941	14.9552	0.039336	0.187766	0.0144457	0.786416	0.0612601	12.0465	33.8588	20.4007	5.20644	0.140022	7.50289	30.7644	8.53327	3.87596	10.458	7.27945	19.8428	36.8751	6.12845	0.761217	40.6193	1.6453	0.121233	17.1567	4.99604	36.9479	56.9784	8.54956	3.38056	51.9134	0.974883	0.574608	0.023597	0.11274	0.256354	3.87234	6.0097	7.22158	9.2338
TCGA-FG-5964	380	0	567.087	2.95335	14.6372	30.0175	10.5421	2.49742	0.573933	7.69928	0.00911297	0.100736	0.19336	0.512671	0.00756912	12.5981	49.2195	25.1254	1.95954	0.192396	8.38903	21.5447	5.08802	2.46541	8.09764	4.79361	29.4086	43.4224	3.1451	0.984626	12.5012	4.71361	0.314564	39.7507	4.15078	30.4339	41.7051	6.02558	3.77103	51.5925	0.732681	0.364327	0.0218669	4.46166	0.237558	3.93536	6.3942	8.59991	7.09511
TCGA-DB-5270	3735	0	243.989	4.00473	19.7089	25.1179	10.065	2.31266	0.335294	14.6266	0.200469	0.110321	0.0116857	0.354514	0.0193268	11.0448	41.7255	19.7863	3.07126	0.460499	12.4424	10.2555	8.92467	1.37381	10.9099	7.92465	24.753	45.8263	7.41842	1.01026	14.8272	3.06264	0.829676	86.1154	3.05334	25.8347	17.9816	7.3895	3.57182	44.6018	0.407973	0.313757	0.0515392	0.0627673	0.311063	3.05288	5.84218	10.4134	7.51214
TCGA-P5-A5ET	2	0	338.899	3.7974	9.17565	25.6619	13.6115	3.06708	0.873295	2.75684	0.0272664	0.103513	0.0356026	0.847256	0.0283089	8.9269	24.8167	23.3978	2.21269	0.165111	7.57793	19.9362	5.77177	1.61044	7.7049	7.22854	25.9571	88.9765	6.00761	0.52765	33.3234	0.607133	0.19272	30.9016	0.845868	34.8389	6.34336	7.30073	2.64743	41.8188	0.446957	0.188668	0.0109044	0.024517	0.0839119	4.37228	7.5392	9.8749	10.0253
TCGA-CS-4944	325	0	389.175	2.09995	17.5571	15.0833	15.9703	7.7333	0.63759	7.8761	0	0.024798	0.00939778	0.174008	0.00341601	10.1848	41.0569	23.6886	2.56115	0.0767333	15.6255	4.89472	3.8725	1.38993	4.47379	4.91336	19.8224	36.3405	3.56503	0.0862211	61.4134	4.01262	0.0486738	18.4665	1.39146	39.4658	16.4054	3.43749	3.01778	43.2452	0.154097	0.0758879	0.0345405	1.56427	0.0670074	2.30172	9.94452	3.58759	8.01209
TCGA-CS-4941	236	1	212.98	3.96701	11.5647	14.9082	10.6633	4.36109	0.516225	20.391	0.0225649	0.141095	0.00859359	0.286761	0.0124948	9.92613	62.6589	11.3985	4.71662	0.0738601	23.6278	17.2986	4.99204	2.76953	19.93	5.49204	20.2055	25.6865	17.071	0.846045	5.94278	8.60613	0.170617	20.1558	6.78193	28.5254	37.1367	8.10506	3.87762	36.4795	0.581254	0.069394	0.0496331	0.380429	0.0245094	3.06611	9.26228	8.91714	10.3174
TCGA-E1-A7YV	989	1	424.813	6.04174	24.9476	33.5518	8.92325	2.12601	0.461422	2.10141	0.0300772	0.439946	0.0245455	0.915952	0.0333091	10.8352	53.6801	16.9096	4.06798	0.0738372	17.9508	17.4142	7.23163	1.63781	18.4525	7.10737	21.886	9.3507	14.2246	0.323358	27.1489	4.3194	0.158204	19.9574	1.36118	21.0822	7.4144	7.85654	1.85651	45.3469	1.13476	0.0616644	0.0240571	0.31101	0.239573	3.8306	12.9529	8.93388	6.70024
TCGA-FG-A4MT	1166	0	326.33	5.38112	18.6832	27.1205	13.2751	2.0585	0.713453	5.88733	0	0.107631	0.011472	0.651244	0.0416996	10.6305	46.828	27.5244	3.6711	0.123249	14.9266	13.0648	10.8959	1.4754	15.8674	7.88193	26.2323	31.0584	6.35102	0.716516	17.6088	4.43672	0.247569	42.2508	1.6326	25.9226	7.99686	4.88084	3.32404	49.809	1.06594	0.409147	0.0361404	1.99078	0.305374	3.17017	8.49458	13.2406	7.19692
TCGA-DU-A7TA	2567	0	475.732	5.54568	17.4288	33.9519	15.3932	1.22365	0.804675	22.9393	0	0.499154	0.0449248	2.24393	0.764683	10.1321	44.2251	24.8246	5.72106	0.0512606	14.8282	5.97291	10.0003	3.24865	14.5108	5.27926	18.6494	6.5328	3.84085	0.336731	20.581	5.40369	0.117008	12.9767	5.21161	33.1454	22.8545	7.11411	3.03455	48.2035	1.06685	0.20432	0.0398555	3.09791	0.201028	4.45233	6.2697	12.7272	7.45942
TCGA-HT-7610	1708	0	131.261	6.6547	14.8555	26.2674	11.1452	1.55578	0.26592	9.29941	0	0.0591001	0.033596	0.854475	0.0561745	8.26943	38.2381	18.122	4.75976	0.375376	11.5493	7.14568	13.4188	1.88588	14.4547	8.91557	14.9369	31.9781	5.80129	0.879642	18.3393	2.5878	0.640912	62.7259	1.85127	22.1056	5.78236	6.9995	3.67629	45.1307	0.628919	0.23964	0.0493912	0.0436263	0.284259	3.1954	6.37891	9.67297	6.55776
TCGA-DU-A5TY	1035	1	323.179	4.81103	16.707	14.9075	10.4494	3.23601	0.730401	32.7794	0.0100511	0.52186	0.019686	0.313098	0.029219	10.6024	46.709	12.0735	2.38588	0.0937632	19.8199	21.1344	5.57019	3.40116	17.6179	13.1741	16.229	48.374	21.7213	1.76675	4.29339	5.42057	0.0644326	10.8125	15.0493	21.7576	50.9138	10.2595	3.84786	32.7462	0.541351	0.108185	0.00602945	4.00589	0.0218343	3.7938	6.15864	4.59961	8.09753
TCGA-S9-A6WI	2587	0	213.463	3.33352	24.9789	24.353	10.0481	1.4385	0.333834	2.30732	0	0.0680327	0.0426202	0.470453	0.0271111	14.3604	25.5983	24.6879	1.86346	0.616115	8.6837	4.51952	10.2724	0.818169	7.08458	7.41599	34.976	87.108	7.13448	2.35993	14.3547	1.32914	1.33416	123.663	0.925234	23.5112	4.88385	7.73745	3.6807	26.624	0.390675	0.864387	0.0739714	0.391326	0.642103	3.94702	4.07591	14.6209	7.78517
TCGA-DU-6404	4070	1	477.715	5.03385	15.5789	29.0047	6.74647	3.69623	0.31962	6.52819	0	1.34337	0.0105916	0.292659	0.0862387	9.58196	68.3554	16.3073	3.09629	0.873	18.6537	17.1463	3.68718	2.62498	17.9332	5.60205	16.546	5.17049	24.0711	0.515394	16.0482	14.9851	0.0383998	11.1355	2.83141	21.8726	10.7772	5.43722	2.4963	48.6026	1.05867	0.144685	1.18341	1.04591	0.045815	2.52705	11.7988	7.41631	5.75277
TCGA-TM-A84F	1798	0	392.403	3.44548	10.5777	21.5916	10.9812	4.86608	0.574042	25.0362	0.0109376	0.0549573	0.0107112	0.457677	0.0295252	10.4417	44.338	17.9104	2.38037	0.230918	17.2277	13.9308	5.56364	1.46061	10.723	5.02851	27.7436	35.9806	5.97516	0.467418	43.2799	9.43793	0.0593289	16.8892	11.5565	26.2065	29.3369	6.07945	3.1	35.7606	0.59764	0.0756822	0.00656129	0.516323	0.148502	4.17306	6.62501	7.03389	7.30965
TCGA-P5-A731	276	0	269.575	3.57133	20.6862	17.8743	16.8779	4.4027	0.502012	4.7362	0.329155	0.333838	0.041785	0.397469	0.017087	9.53908	24.0147	20.3149	2.83498	0.0628482	14.5294	6.70731	6.30982	2.07449	7.53699	6.05983	24.2897	34.9016	4.06692	1.38231	14.1757	3.69262	0.220925	31.9184	2.52276	27.879	31.6427	6.86739	3.09025	34.4114	0.456769	0.161679	0.00548485	0.530269	0.0993107	3.44864	9.77386	6.85662	7.67776
TCGA-E1-5304	1253	1	590.234	8.34913	24.1725	26.1179	8.14832	0.349564	0.652365	1.63395	0	0.623653	0.0501681	0.641046	0.0455892	8.5821	71.6472	20.483	6.21584	0.0517421	15.8643	37.0232	5.90404	5.8562	27.4859	8.70615	14.8087	12.931	11.7075	0.276164	1.11197	5.98483	0.0433058	12.9096	1.08655	38.908	5.01079	10.7879	2.16422	50.1454	0.719786	0.0202556	0.737548	0.201361	0.047694	2.5697	3.93552	8.53748	7.30993
TCGA-E1-A7YQ	1580	1	249.327	6.17734	19.1948	24.2292	7.54833	2.90161	0.513292	45.7351	0	0.812791	0.00584551	0.358006	0.0204511	14.4038	52.039	11.402	5.18911	0.131882	17.7043	14.0051	7.47292	3.49414	16.6395	8.03243	20.0189	0.787687	10.1303	0.613655	18.0478	21.7183	0.070643	12.4302	12.1709	25.8815	31.9977	6.04972	2.53561	29.117	0.887607	0.220281	0.0644535	5.96562	0.0486258	3.15557	4.92959	11.9726	7.09372
TCGA-S9-A89Z	366	0	321.516	4.64416	11.3365	28.3679	11.4428	1.43882	0.617238	24.1886	0	0.328685	0.398518	0.740012	0.208487	14.9879	59.4715	21.2216	4.3225	0.184864	18.9782	17.8882	7.16931	2.78102	17.6008	6.34948	19.6416	20.9564	4.26267	0.082798	4.20372	9.17393	0.0337577	13.8118	7.03325	35.4092	32.2788	9.32409	2.97792	51.0578	1.3092	0.008772	0.0205333	2.00822	0.0247856	4.0801	7.69111	8.29593	9.53135
TCGA-DU-6403	356	1	219.218	5.54869	14.9354	24.5097	9.28503	1.63527	0.472708	15.0447	0	0.0828629	0.00538334	0.801249	0.0462293	11.5036	48.4866	11.4118	4.16873	0.0890671	12.0956	17.8858	5.6747	1.45749	16.6637	7.23363	22.0326	83.77	11.0458	1.72865	10.1682	8.46435	0.150446	21.589	6.88858	24.2515	22.7537	6.46164	3.35115	34.3566	0.476297	0.0316975	0.0148394	3.9314	0.0940406	2.28046	5.56058	7.53803	7.67631
TCGA-FG-6688	223	0	182.651	3.08272	15.0037	15.4653	17.9545	4.49239	0.657019	16.5188	0.125187	0.0786266	0.0178784	0.380143	0.0389919	11.8028	53.1828	10.3988	2.23416	0.234333	16.8638	11.2439	5.02844	2.22493	12.5869	4.07628	18.3554	96.9025	9.54726	0.927387	6.2791	12.256	0.084881	17.8488	7.58155	23.479	32.2595	7.0043	3.65011	35.2244	0.390873	0.0782003	0.00938715	7.96736	0.0212459	3.29156	8.5457	4.92244	9.21072
TCGA-DU-A7TC	1139	0	707.76	3.15739	22.7324	25.489	11.9927	4.22922	0.893351	5.45123	0.0518629	0.0463272	0.0507892	0.333562	0.0179486	11.6497	50.4407	31.3803	2.11373	0.186735	10.0548	10.6953	7.8802	0.978725	10.5531	5.40011	42.7557	32.1524	7.41207	1.80514	31.2883	3.98888	0.541327	55.4132	1.84078	31.4812	8.02904	4.90718	2.83354	34.7864	0.445315	0.279114	0.0414822	1.2999	0.286354	3.97487	8.21206	11.491	7.33061
TCGA-DB-A75M	546	0	390.058	3.49425	12.4072	20.6628	14.8979	6.08682	0.453089	15.7827	0.0534426	0.0745911	0.0596051	0.958695	0.0647336	9.42515	39.1422	18.8831	2.03703	0.153063	14.4652	18.1837	4.36632	1.57824	9.11254	4.1996	28.754	51.9486	2.59437	0.143639	16.2523	4.05033	0.0395302	7.81856	2.73068	34.5727	16.8573	4.49991	2.88484	34.6242	0.757845	0.06848	0.0374025	0.216241	0.0483731	4.44716	7.15735	9.3882	8.94979
TCGA-DU-6410	244	0	479.879	7.31638	9.08622	54.7369	6.5475	0.276488	0.633768	0.595592	0.0777145	0.387881	0.0114158	0.704579	0.0177509	7.79559	49.0846	32.0585	7.04683	0.110654	7.20758	27.7229	17.6925	1.995	10.8506	7.47826	19.8152	5.67885	3.75454	0.958737	28.2431	0.17622	0.111135	27.2934	0.276543	35.9116	6.94818	7.01332	1.8972	70.9391	0.345776	0.806609	0.00932391	0.424509	0.308101	3.71742	9.45226	8.81905	5.67669
TCGA-TM-A84S	456	0	325.237	3.76765	13.1081	21.9484	14.8025	3.2946	0.660494	6.96623	0.0887006	0.112247	0.0176946	0.75836	0.0204649	8.52973	25.3838	21.8693	3.24834	0.150007	8.76493	16.7608	5.62815	1.95076	7.3824	7.23481	22.2093	62.8991	3.81478	0.369524	49.1544	2.66363	0.0534598	12.8107	2.09884	30.6025	14.5018	6.65409	3.41989	46.1414	0.430814	0.159122	0.0354733	0.538355	0.0428195	3.28853	6.05753	5.49421	8.68764
TCGA-E1-A7YU	25	1	421.374	3.70567	13.2827	19.6756	12.7296	3.6215	0.719714	7.75342	0.0202582	0.301975	0.120686	0.805304	0.046272	8.96159	50.649	21.9713	3.17144	0.15417	10.0616	17.5779	4.9589	2.28504	12.2037	4.80124	23.7627	63.1882	3.64264	0.534956	9.41759	4.06595	0.129866	21.7587	3.01659	30.0602	12.4962	6.12188	2.69521	33.1171	0.679965	0.132387	0.0364576	0.963139	0.198034	4.35487	6.39535	11.2036	8.91178
TCGA-DU-8167	473	0	458.394	4.74613	12.3044	20.5088	20.5094	2.31889	0.517294	25.7286	0.11142	0.124409	0.0121237	0.634588	0.050128	7.30487	41.8385	26.0221	2.54451	0.0638229	19.9188	22.3126	5.86384	1.86189	16.1729	5.46572	16.2397	72.2736	5.69015	0.288236	14.034	5.68457	0.0595217	13.4534	5.32709	34.0432	21.2068	7.80845	3.14246	48.6572	0.59431	0.478282	0.0167097	0.0375693	0.0958083	3.3178	5.44079	7.26449	9.01614
TCGA-HT-7879	114	0	215.804	5.15102	11.5033	24.805	15.0071	3.53895	0.52595	16.3597	0.0229901	0.169423	0.0900565	1.52673	0.152762	7.75045	44.2444	16.2907	3.37714	0.127928	13.216	8.57967	5.18122	2.52033	14.5441	9.07797	20.3161	44.2216	5.23801	0.352208	11.6923	6.99771	0.0453472	8.31491	3.44017	31.9254	10.222	6.13987	2.9444	43.3433	1.17245	0.0471342	0.0551653	3.37984	0.0166474	4.03249	6.21178	9.33607	7.12648
TCGA-FG-7636	546	0	500.674	3.74171	15.1769	32.013	10.8038	2.3086	0.763457	7.60936	0.148319	0.0434727	0.0817025	0.318935	0.00769951	7.02255	52.3011	22.1433	4.35467	0.022757	11.9	17.1258	5.31731	1.59847	14.6873	6.06348	31.2935	23.7958	3.12007	0.39615	17.1715	5.05045	0.0594253	17.1019	2.06547	28.5826	13.3016	4.72633	2.82449	42.6291	0.441393	0.135413	1.1511	0.687654	0.0906187	3.41831	4.97347	6.4864	7.35673
TCGA-DU-A6S8	680	0	358.103	4.7944	20.8392	31.85	8.86715	1.45941	0.786637	2.30101	0.0102552	0.233595	0.0200858	0.705665	0.0149062	15.137	33.7839	32.5857	2.83932	0.422951	8.59077	25.8518	9.37861	4.73335	8.60425	6.07412	25.9335	30.2075	4.4686	1.02121	21.3509	0.867308	0.182053	26.9453	0.960034	42.2831	9.27329	7.37415	2.35418	52.7763	1.593	0.654409	0.00615191	0.0414949	0.089111	4.56805	5.30249	9.73838	9.97195
TCGA-DU-5874	463	0	419.629	7.58272	13.8023	26.6721	7.87499	0.665278	0.543827	3.40764	0.0277742	0.211658	0.0509986	0.705386	0.0216271	10.3903	36.2452	24.5507	5.75225	0.579559	7.16022	27.7739	10.2423	3.90703	8.79279	5.30295	23.3483	26.1855	6.48083	0.806214	28.7015	1.05957	0.140383	21.9642	0.699434	40.4477	11.2605	7.06605	2.2842	53.663	1.03522	3.08558	0.012496	0.248175	0.139525	2.79081	9.0271	10.6042	5.95827
TCGA-HT-8018	1154	1	256.074	4.23252	18.5868	19.4833	9.29489	3.2777	0.366785	20.9823	0.0219803	0.247882	0.0275045	0.349164	0.0395559	13.2348	33.9579	20.4864	3.38301	0.330954	12.4824	8.13823	14.6744	1.31406	11.6791	8.33093	24.2011	16.4862	11.7858	1.52714	14.7372	3.87053	0.657558	71.3561	5.66763	19.6752	43.0797	7.34627	4.34119	38.9895	0.554756	0.478805	0.0307664	0.212462	1.50408	2.81931	5.21416	14.684	6.67148
TCGA-DU-7012	201	1	166.508	5.42974	13.5978	17.178	14.4417	3.38848	0.362228	84.561	0.0661892	0.137957	0.00840246	0.205158	0.0335964	11.167	45.5794	9.63102	3.9431	0.335811	20.9613	14.3041	10.7148	2.73018	14.7509	8.43429	12.8306	16.7745	23.4356	0.136389	9.84729	9.82093	0.0543985	11.2756	8.97835	20.0607	25.2895	5.25407	4.70777	42.4351	0.298515	0.0169626	0.017647	0.307494	0.0399404	2.70393	7.38456	5.62568	9.22043
TCGA-FG-A6J1	502	0	840.847	2.14593	17.956	16.5027	6.681	3.79482	1.23767	6.02522	0.107946	0.180796	0.0246661	0.607277	0.00224147	11.1075	31.8303	29.7775	1.18985	0.0794998	5.49938	11.3405	3.12686	0.447851	5.30133	2.69873	70.1941	44.6077	2.82555	0.739832	18.4881	3.65172	0.0532302	18.1688	1.58967	45.9021	13.1614	6.27878	2.40565	30.0134	0.834183	0.580943	0.0194265	0.349421	0.117248	8.08729	6.19412	9.83053	9.89773
TCGA-S9-A7IS	243	1	487.713	6.86439	19.9372	34.9537	6.01332	0.559522	0.628819	6.16929	0	0.679304	0.0113267	1.37485	0.116882	14.1237	96.4419	29.508	5.28862	0.0416445	11.0379	36.9113	7.30449	1.08635	20.8912	7.71097	34.9048	35.9396	9.06154	0.618625	18.5549	6.21877	0.0152093	20.4937	1.69696	28.9496	16.8518	6.86695	2.73445	38.5239	0.64402	0.160062	0.0231278	0.213197	0.159129	3.83937	5.66667	7.67195	8.42795
TCGA-DH-5143	440	0	374.322	3.68067	17.0987	23.7503	12.1049	3.42485	0.291478	18.381	0.144397	0.0349334	0.011784	0.414003	0.0199891	9.31898	50.5019	22.0655	3.70232	0.0551419	16.3515	13.2056	6.17706	2.38176	14.1829	6.00101	19.9683	23.4021	4.78535	0.452784	11.5068	3.90845	0.106807	25.7069	2.95562	28.337	14.7668	6.5889	3.87597	63.2915	0.244213	0.425563	0.0336861	0.129837	0.113273	2.58729	8.94618	7.33359	7.22151
TCGA-P5-A733	416	0	360.752	3.49587	19.5144	22.1657	20.0251	4.35161	0.875733	4.07097	0.123449	0.00590745	0.00719604	0.28493	0.00549296	5.54402	36.194	24.3497	2.97707	0.0216469	18.368	5.5994	5.07478	1.59291	10.0046	4.67532	25.2607	14.8672	4.75775	0.213298	5.36132	1.74007	0.0391338	19.0607	1.17787	26.7384	10.549	5.91239	2.84368	45.3128	0.571289	0.020338	0.0105793	0.0237859	0.0670433	2.81515	7.77913	4.52041	5.69554
TCGA-CS-6290	548	0	357.578	3.80185	8.51873	17.6963	19.4214	4.24025	0.490405	31.273	0.0421779	0.0508626	0.0165219	0.600068	0.0315292	9.96189	43.3018	19.2972	3.01093	0.157386	15.1057	11.0241	7.00565	2.29308	12.4864	4.8973	19.1673	55.1718	6.16771	0.0748194	9.80553	10.2826	0.0415974	11.4979	11.4436	25.3825	29.6665	6.08317	3.03635	47.8166	0.592619	0.194565	0.0253018	2.46891	0.0641374	3.19321	5.03198	5.06259	8.22516
TCGA-DB-A75L	344	0	357.946	5.45688	17.9314	25.2185	14.5387	2.40819	0.505655	11.6775	0.0260937	0.151506	0.0298125	0.808795	0.0722438	9.44324	43.7921	20.7517	4.1671	0.260502	15.845	14.819	7.67481	1.68402	14.3399	6.26821	22.9056	26.9953	8.06424	0.508463	4.91069	6.26864	0.244478	33.5513	2.9713	34.3322	9.08366	6.89238	2.90355	38.2394	0.583891	0.180554	0.0260886	1.85941	0.174777	3.81052	5.39064	9.12803	9.26276
TCGA-R8-A6ML	2862	0	306.862	4.26687	14.2318	23.2515	11.0812	1.84563	0.651365	1.01951	0.0162972	0.131019	0.0172898	0.539871	0.0321485	9.01731	25.3406	25.7272	5.19462	0.132027	6.87815	14.6821	7.26012	2.21859	7.38282	7.35807	18.4344	64.3624	3.14349	0.351514	34.7392	1.23347	0.124564	14.079	0.281041	29.8368	3.9298	7.47994	2.43384	46.8873	1.28485	0.607689	0.00488819	0.950666	0.0619552	3.04025	8.46837	6.14136	10.4149
TCGA-FG-5962	789	0	246.671	4.23007	16.6597	27.6281	11.4297	1.85075	0.576337	5.51045	0.80945	0.0468341	0.0264231	0.55254	0.019864	12.2512	30.0273	22.2233	3.88632	0.314328	8.39159	11.1285	10.8452	1.98761	7.48446	7.80744	25.4735	58.8439	6.19953	1.10065	31.9387	1.90761	0.511643	62.7647	1.37372	29.749	7.25388	7.26419	3.67961	51.9788	0.442289	0.661928	0.013243	0.332485	0.459582	3.71406	6.71661	9.29073	7.56112
TCGA-DU-7304	711	1	2401.54	2.11945	13.1211	21.8742	3.27582	5.9719	1.09202	0.977595	0.0136612	0.0823705	0.0512838	0.292173	0.00567341	13.493	56.8363	27.7975	0.835906	0.0134148	3.23468	20.8512	1.43503	0.218446	7.17312	1.84141	57.0111	11.3408	3.38135	0.203782	0.715857	3.10608	0.0269463	13.5913	0.13462	57.4538	5.64883	4.24123	3.01606	10.149	0.298583	0.0945276	0.00819511	0.322446	0.0296768	10.807	3.1127	8.27205	4.69273
TCGA-DU-A5TT	745	0	241.958	3.62164	15.619	22.495	13.1715	3.5074	0.922588	8.75507	0.057611	0.238011	0.0329107	0.296872	0.0259193	16.8369	45.9434	17.8383	1.96049	0.127287	19.4228	14.8895	5.55351	2.02086	14.9531	6.8149	25.3917	34.7293	14.1303	0.274845	6.44102	4.06614	0.0804921	19.9467	4.016	21.0458	9.6608	6.6117	2.25747	29.9127	0.49467	0.0516749	0.0921595	4.96001	0.0886484	4.35797	9.61012	10.2364	7.09392
TCGA-HT-A61A	196	0	157.969	4.30936	20.7669	20.7786	11.8299	1.97908	0.52633	5.054	0.155204	0.11091	0.0287094	0.346367	0.00859402	10.0544	26.6278	23.094	2.33488	0.30989	9.73356	4.25145	14.169	0.836193	9.2321	7.91085	29.4818	64.0537	9.08947	1.45166	17.9449	1.55356	1.02045	90.5714	1.89759	19.7183	4.08512	6.9163	2.79623	34.5182	0.468443	0.556848	0.0806901	0.258174	0.466398	3.6241	4.85771	16.3962	6.96328
TCGA-P5-A5EW	206	0	258.526	5.7743	12.8905	20.2047	17.0099	3.2517	0.592984	21.232	0.0464814	0.0435961	0.0166904	1.34636	0.102308	6.88383	42.4014	21.9308	4.11288	0.0456432	16.8618	17.6664	8.18503	2.53509	16.9648	7.89529	18.297	23.0035	8.04136	0.0787054	8.09929	3.68038	0.027505	8.14452	2.44794	32.4997	16.0941	5.9595	3.18497	58.6477	0.595033	0.185828	0.10038	0.0438841	0.0403894	2.65949	9.14601	6.18295	7.856
TCGA-S9-A7QW	460	0	728.87	4.10368	13.2233	28.1748	17.0385	2.74817	0.503301	3.49513	0.0804302	0.080826	0.0951745	0.768933	0.0313145	6.71965	54.2524	24.1463	2.12911	0.182641	14.424	18.1879	4.80042	1.61631	13.2528	5.22664	32.2564	46.2658	3.29018	0.745801	10.0117	1.89155	0.104111	13.2715	1.01823	35.9012	8.35704	6.1283	2.67982	40.6318	0.831865	0.332373	0	0.18306	0.147422	4.24321	7.99453	8.5217	7.7033
TCGA-HW-A5KM	632	0	327.08	6.21861	13.5757	27.0736	9.05085	3.33442	0.613686	104.802	0.00628137	0.0568105	0.0123027	0.327089	0.0326077	13.6116	46.8995	20.6895	5.20913	0.188127	17.8274	19.9437	13.6943	3.0458	16.5745	9.18165	24.0757	5.65177	2.71428	0.124087	9.17902	19.2398	0.0154873	8.42933	14.1367	26.1954	50.0742	7.52785	3.16271	68.2081	0.480505	0.0241464	0.0339127	0.0804837	0.0136453	3.26087	3.68243	6.54984	8.52375
TCGA-DH-A7UR	1652	0	514.779	6.36024	14.1929	26.6049	7.47362	1.73109	0.607506	1.6049	0	0.685908	0.401051	0.489297	0.0217538	12.6576	38.0368	32.154	3.45106	0.196396	8.77204	33.6336	8.2248	2.18969	9.5163	3.71007	37.0391	15.8308	8.51446	1.48211	10.7424	0.61869	0.263	30.5518	0.542246	41.5019	9.69564	7.55186	2.4153	40.76	1.47197	1.14959	0.0114265	0.019268	0.232754	4.21125	4.91925	12.9857	6.12938
TCGA-DU-7294	2871	0	386.458	6.12893	14.3938	32.6616	11.4167	1.03984	0.56338	7.18248	0.107345	0.192631	0.0187719	0.663071	0.023882	7.76308	36.6351	27.9855	6.39025	0.289875	8.50626	16.1423	12.4548	2.694	12.8522	8.43532	15.3868	69.2455	3.82145	0.302939	52.8352	1.95948	0.0642766	16.8649	0.826926	27.4966	3.84102	8.04438	2.88395	75.6443	0.646391	0.312433	0.00919919	1.20995	0.0707897	2.63765	8.77664	4.55223	9.34143
TCGA-FG-A70Z	330	0	277.483	3.86676	15.0751	20.1563	11.0999	2.55285	0.613727	10.4094	0.0752571	1.25541	0.0171965	0.360394	0.0109388	12.5293	54.3976	14.7369	2.30896	0.0997649	15.3453	12.3885	5.89546	2.2539	13.4573	6.60832	30.047	23.0234	11.9713	1.09833	15.2079	6.18482	0.166998	23.7423	6.50544	29.8361	38.0641	8.04335	3.12639	27.2651	0.405335	0.237224	0.0270872	0.370484	0.192094	3.36042	8.72214	6.69197	8.48972
TCGA-E1-A7YS	468	1	367.119	4.55522	0.922331	26.8453	9.90032	0.210925	0.552554	1.3625	0	0.13754	0.0209427	0.924686	0.106575	10.5258	28.0448	29.4978	8.9519	0.235198	7.58858	21.4795	17.1626	3.12014	12.4853	6.34642	18.4946	4.56626	6.96091	1.176	20.3071	0.718206	0.113892	22.8794	0.913186	39.4868	2.72364	6.95965	2.54312	70.2901	1.59586	0.47352	0.020526	2.33632	0.264802	3.9383	11.3846	11.094	7.9206
TCGA-DU-5871	578	0	616.718	5.02906	13.5364	31.3307	18.2535	2.25484	0.471632	25.8257	0	0.0321637	0.0169778	0.647316	0.0365529	8.62993	38.2863	23.714	6.18426	0.0785725	13.7048	14.8738	7.29977	3.07072	14.8995	5.41506	19.4413	7.96069	6.14039	0.393559	8.09208	10.8862	0.0670769	11.978	3.35106	29.4505	14.335	5.92723	3.8494	56.8726	0.612094	0.10458	0.0144	0.723067	0.0825649	2.424	8.77405	6.07993	6.82068
TCGA-E1-A7YW	1122	1	457.391	5.03217	11.58	25.8109	16.7632	3.36128	0.802417	17.5684	0.0385937	0.0452475	0.0724398	1.19101	0.0761316	9.38623	36.3286	23.5909	5.27147	0.0378977	12.6729	12.0335	5.88144	2.42679	12.4572	5.79028	14.6543	26.0371	3.55971	0.423993	9.80873	9.11782	0.0856404	9.07075	5.00739	26.0511	13.6563	6.08057	2.47363	39.1868	0.617572	0.0593436	0.0463033	3.02558	0.110038	4.04851	7.92776	10.6512	7.70221
TCGA-DU-A76O	524	0	486.383	3.61843	14.2698	22.5041	8.44538	3.38792	0.408314	24.4108	0.0486244	0.061894	0.0174598	0.834207	0.0302901	12.1805	67.6357	20.2726	1.78515	0.152792	11.8264	17.4163	6.8072	2.47124	10.1545	4.6722	42.1692	34.4788	4.235	0.639069	8.54606	9.48211	0.0815236	13.7385	9.76938	32.9527	16.7453	4.98841	2.72704	35.1109	0.888153	0.142058	0	0.564004	0.216539	4.84753	10.4456	7.93231	5.56328
TCGA-S9-A6UA	180	1	278.719	6.28265	17.848	30.8082	8.66263	6.49198	0.391098	42.7965	0	0.375041	0.0155523	0.31196	0.0329765	20.0573	47.7799	22.105	4.05752	0.561408	14.557	13.5698	7.98469	3.35616	14.6838	4.05253	18.3398	49.5808	6.32382	0.473791	12.9425	11.8592	0.0978903	15.7129	13.1673	24.8758	33.3932	7.10438	3.20877	65.0212	0.688003	0.122097	0.223879	11.9092	0.00862476	3.3945	7.44303	10.2343	8.66315
TCGA-HT-A74H	76	0	330.887	2.73535	17.0564	10.3695	19.3113	4.68204	0.458642	10.1751	0.142006	0.126849	0.0324488	0.503981	0.0216239	10.5441	33.7491	14.5176	0.901778	0.0743707	16.464	5.35847	3.69458	1.14968	7.73444	3.49994	26.7245	103.351	10.5789	0.507625	7.19029	11.0641	0.107373	18.0637	4.43645	20.2621	15.4011	5.86848	2.57596	27.3128	0.177355	0.109178	0.0681495	2.90487	0.0308485	3.71239	5.19948	5.07433	9.02844
TCGA-S9-A6WE	2210	0	339.828	3.72827	14.3828	25.1751	9.8736	1.76909	0.525519	5.82579	0	0.165954	0.0253683	0.557786	0.0080685	9.96901	34.8709	26.0813	4.91326	0.300479	7.304	13.1184	10.0094	1.75484	9.01533	8.84515	26.5662	47.1951	3.35763	0.458215	30.4865	2.05984	0.100595	20.1392	0.707303	36.6718	8.00879	9.13287	2.95985	55.5118	0.970588	0.418237	0.0174821	3.9437	0.0896858	3.01152	9.76985	6.34097	10.3061
TCGA-S9-A6WO	568	0	531.959	5.36444	12.5948	26.1673	16.7624	2.36544	0.514444	25.6005	0.0505663	0.0609781	0.0627246	0.968616	0.0545996	8.11797	44.6864	21.842	4.05959	0.0645507	14.1836	3.92983	8.22187	2.26399	13.9996	6.59811	18.145	23.6507	4.41461	0.265021	14.793	5.91276	0.0997404	7.30973	5.18773	27.0097	14.3571	5.26077	3.32926	52.8407	0.876258	0.0544273	0.0424673	0.68883	0.0494312	2.81621	7.39947	8.78927	7.22845
TCGA-DU-7306	1279	0	295.141	5.51351	8.63645	29.9423	20.8608	2.67609	0.573496	10.998	0.473513	0.0629793	0.0931967	0.573046	0.0289187	12.0188	29.3879	25.0033	8.41132	0.16069	17.2327	4.68558	8.92614	2.93113	15.1526	6.26258	15.9603	42.4205	6.03785	0.084221	18.8294	2.99579	0.00686758	24.919	2.51602	40.208	17.3765	6.53592	3.09564	64.4279	0.603343	0.016061	0.00417724	0.084527	0.00756347	2.261	5.63126	6.88912	8.93972
TCGA-HW-A5KK	390	1	231.254	3.31677	10.985	15.6085	14.7212	4.141	0.486771	19.1847	0.00861232	0.0461584	0.0098397	1.40346	0.118029	15.6518	33.5303	12.8647	2.24805	0.173369	15.0686	8.22573	6.09697	1.87216	10.5028	4.47968	22.2438	145.374	9.20457	0.274298	13.1981	14.5409	0.0679502	15.4751	8.42542	22.4634	41.2493	4.46221	4.11735	31.0941	0.578144	0.357554	0.0619965	7.55609	0.0374178	4.09388	6.51079	7.04795	8.6018
TCGA-HT-A5RB	5	0	311.861	6.10653	15.0375	27.7924	9.17395	2.10436	0.429148	6.2621	0	0.0605327	0.0485794	0.593069	0.0198654	7.81872	40.0535	20.5853	3.89796	0.255737	18.2354	14.3551	10.2796	1.41493	16.4859	8.71582	17.1754	16.3311	5.62542	0.659975	4.48865	3.23119	0.20443	28.691	1.46649	24.9499	6.04708	4.29404	2.37632	43.684	1.08698	0.294212	0.0127534	0	0.225145	3.49197	8.09067	11.7747	6.00645
TCGA-WY-A85C	1428	0	610.214	6.33435	8.77195	27.1278	10.2063	1.44885	0.752591	4.84405	0.00855117	0.0544239	0.0125612	0.628168	0.0301856	8.96849	47.186	22.7611	4.15432	0.121756	18.7924	19.3203	11.2962	1.89951	13.6701	4.90701	14.6548	5.5942	3.5689	0.41025	11.8072	3.62645	0.063251	10.3155	1.84914	29.8345	9.73632	6.86886	1.69811	40.2654	0.854384	0.512799	0.0359079	0.4671	0.232201	3.41137	7.11864	11.0511	3.97177
TCGA-HT-7676	7	0	460.862	5.09728	17.7901	23.2321	13.7958	2.68149	0.512212	29.9557	0.0714784	0.0867948	0.00874983	0.51511	0.00927642	6.67027	55.5343	21.6008	4.54619	0.162313	15.6262	13.6558	6.92253	1.50592	17.0966	6.13409	19.78	23.2955	5.14705	0.259354	9.28184	11.7015	0.0264354	10.5826	4.43649	32.5119	27.5001	7.16779	3.00329	63.2286	0.376614	0.109909	0.0160795	0.325371	0.0533759	3.05174	6.79081	7.64279	10.1808
TCGA-S9-A6TV	573	0	460.817	4.11034	17.1716	15.1093	13.0438	2.88054	0.709439	23.5179	0.00691838	0.322129	0.0158087	0.860442	0.112053	19.9855	42.2915	25.801	5.66534	0.0407617	18.4157	15.0569	8.06898	3.6447	19.3159	5.34757	17.442	0.875845	14.7381	1.37787	10.5472	6.79655	0.0648199	9.59889	10.1353	40.7593	98.2686	9.4063	3.16038	40.9516	1.44729	0.0478712	0.0290515	0.16796	0.368212	3.94903	9.26177	7.34405	6.41289
TCGA-HT-A617	493	0	255.011	3.14067	31.0982	23.7009	13.0776	6.05821	1.08715	16.536	0	0.250175	0.00515061	0.305666	0.0349478	13.2967	60.3331	16.8298	3.75	0.5113	12.712	11.2856	5.52146	1.582	11.0416	5.1655	26.0909	50.9496	12.1928	0.118743	4.90507	8.05169	0.0778065	28.1435	5.36131	33.5647	58.0892	4.62959	2.63603	52.8911	0.484445	0.0323491	0.0189305	21.0896	0.0228508	4.03622	9.49034	6.10683	9.48681
TCGA-CS-4938	145	0	246.954	3.65582	13.4756	19.9745	15.7011	4.43547	0.442907	18.4152	0.0573098	0.0191973	0.0734949	2.14495	0.185303	7.43727	43.2495	19.533	3.26688	0.0321579	18.0467	12.7424	4.08375	1.57097	12.9716	5.83828	17.8362	22.5445	4.12494	0.0495106	9.61352	2.9352	0.0242233	9.97981	1.28187	26.124	16.1967	6.47916	3.19485	52.1871	0.140596	0.0188834	0.00491131	0.0772963	0.0044463	2.74293	9.32938	3.84331	8.72426
TCGA-E1-5311	4086	1	481.421	4.06797	15.3858	32.5384	9.31349	1.03612	0.530235	3.54342	0.0547243	0.281842	0.0234463	0.273516	0.00426125	8.95574	32.5615	22.4621	10.5472	0.0973992	6.95644	18.1632	10.8372	1.75307	10.0721	7.83737	16.4848	24.5038	5.87462	0.515714	28.1111	1.55111	0.23275	29.2218	1.06354	28.921	6.70831	7.60788	4.17012	55.127	0.656771	0.231404	0.0246211	1.38392	0.226615	2.59687	15.1628	9.85205	7.27563
TCGA-DB-A4XH	964	0	365.848	3.3932	12.0635	19.6897	11.314	2.24944	0.519022	1.47411	0.0105378	0.0423585	0.0171994	0.511987	0.0175051	8.59217	25.5591	22.2869	3.23538	0.434605	10.3665	12.4046	7.8324	1.41633	8.87036	4.80931	18.8139	63.7077	4.93823	0.535298	13.2783	1.29806	0.187069	22.033	0.548049	28.1492	4.63467	5.29108	2.18519	46.2384	0.682724	0.9479	0.0126429	0.710638	0.240362	2.55616	7.8126	6.08096	6.61636
TCGA-E1-A7YH	2837	1	360.283	4.43621	8.20961	16.0603	16.406	2.25747	0.713737	9.13131	0.0169992	0.148051	0.0180345	1.08278	0.0705965	13.388	33.975	23.0597	6.36817	0.0625973	13.7073	9.30424	5.22443	1.60154	11.8634	5.50966	29.2733	85.8324	3.62879	0.335815	13.5886	7.03206	0.0293391	11.3703	4.59263	34.0109	10.392	6.66498	3.18907	39.3205	0.636923	0.0784164	0.020395	11.0052	0.064624	5.01107	7.92112	8.54576	8.67382
TCGA-DH-A7UU	107	0	166.339	5.49997	14.2434	31.2575	10.89	2.56048	0.540057	11.0894	0.00983613	0.0988453	0.0321083	1.06784	0.0816977	10.8956	54.5948	12.9166	2.92605	0.0531231	20.644	24.428	6.65964	2.01917	16.6272	6.15049	12.9569	26.3607	8.954	0.400518	2.75961	3.32144	0.0533541	9.2058	3.21474	32.2883	11.9343	5.94991	2.20568	28.5007	1.22846	0.0529358	0.00590052	0.0994982	0.0801278	3.76618	9.17999	9.65196	8.24976
TCGA-HW-7493	1094	0	175.449	5.57535	12.1083	20.7096	15.1547	3.69868	0.26516	26.0417	0.0604944	0.0173692	0.0394947	0.243089	0.00717799	6.58019	35.55	20.5498	6.02113	0.173967	20.6049	7.83718	11.4135	2.17367	13.1689	11.1871	12.0217	17.7604	4.53316	0.459904	15.9044	6.4985	0.13637	33.0082	3.82275	22.5222	11.6229	7.74544	3.61413	67.123	0.215867	0.39201	0.0518422	0.186495	0.201815	2.08926	8.01419	4.98006	8.13771
TCGA-P5-A5EY	74	0	206.029	2.99204	18.8848	19.9256	13.123	8.36091	0.407598	6.23879	0.0194156	0.0325187	0.00792238	0.207622	0.0020158	13.0838	29.3274	20.5877	3.71359	0.128692	14.6438	8.28996	5.58392	1.13277	9.32577	6.43948	21.192	13.1531	4.19993	0.857122	9.56827	2.03469	0.201058	32.5319	2.57757	21.1305	9.01737	4.8543	3.07686	43.8846	0.257643	0.134345	0.0174707	0.0261868	0.142349	2.40499	8.38066	7.6344	6.82513
TCGA-HT-7469	353	1	408.15	10.1376	16.2818	32.7337	13.0028	0.730241	0.843738	9.35302	0	0.372618	0.00687721	1.03045	0.0664948	7.20061	61.0466	22.0474	7.15132	0.0206879	10.9548	24.1246	4.86067	2.86985	24.1587	9.75412	15.686	4.4261	31.3137	0.285387	0.58592	7.14769	0.0457111	6.99259	2.8142	33.1352	11.8203	10.0863	2.20922	50.6204	0.861724	0.0388739	0.0101105	1.29004	0.0320365	3.55897	7.81257	10.4814	5.13908
TCGA-HT-7687	5	0	293.77	7.45484	16.3498	25.8855	9.85299	1.27462	0.278581	6.06459	0.0504907	0.200138	0.0673007	0.670992	0.0314527	8.36713	29.6456	22.9825	7.16853	0.743703	9.29428	15.3151	12.9728	2.95304	11.9926	7.14927	15.849	35.3604	5.2856	0.688703	38.4526	2.58374	0.207482	29.7453	1.61702	29.6111	5.55879	7.01605	2.7216	63.9911	1.45825	1.12574	0.0555289	3.4617	0.173665	2.64769	5.98642	8.78607	7.06636
TCGA-DU-7009	4208	0	330.554	5.77126	15.3454	31.5417	12.783	1.33726	0.422988	2.29608	0.102052	0.0774853	0.0111044	0.574116	0.0240162	7.40518	28.3334	23.6524	5.27304	0.160338	12.4976	22.3391	9.98799	1.70828	11.4414	8.66817	13.3007	60.8195	6.99653	0.408689	28.6828	1.35508	0.261683	34.3362	0.931144	30.0534	4.82344	8.15355	3.18338	63.4179	0.6479	0.162151	0.0244877	0.0917613	0.133015	2.52359	7.55224	6.62495	9.45956
TCGA-HT-7677	496	0	267.666	7.53046	9.77567	25.7012	10.7591	1.26274	0.421525	6.14443	0.0139215	0.219176	0.0352193	1.11814	0.0563697	7.15482	27.8047	19.8249	5.26656	0.447707	8.52487	21.801	11.7522	3.88361	11.7985	8.19699	14.4975	59.8175	24.3763	0.446199	63.7798	1.29255	0.0789466	11.8976	1.18131	30.8086	6.64297	7.34603	2.89168	59.4827	1.7713	0.465588	0.0125269	0.145518	0.0907266	2.60275	8.10687	8.16622	8.42223
TCGA-HT-7684	186	0	549.405	2.40829	30.7713	23.2443	17.794	6.44449	0.593192	6.52917	0.030611	0.229003	0.0016654	0.230086	0.0211876	8.07256	44.8329	34.4709	1.32618	0.0651277	11.7639	11.4502	4.34581	0.890761	10.5046	4.00624	39.9635	20.1474	5.72478	0.481302	20.917	7.46639	0.0402528	15.9277	2.45785	22.653	43.6557	6.37779	1.77151	35.2662	0.446028	0.0784483	0.257082	0.77756	0.060956	4.64222	9.64986	5.42532	9.75136
TCGA-DU-A6S6	2895	0	315.794	3.36705	11.8113	20.9539	6.74238	2.036	0.274526	2.49679	0.191249	0.0320317	0.00867081	0.652069	0.00220623	11.278	23.4517	17.1067	2.29157	0.20345	6.51536	15.1255	7.4406	1.44182	5.49108	5.08976	30.9877	34.1666	4.22258	2.23172	27.359	0.573006	0.770183	53.6227	1.07608	31.5894	3.6085	5.29093	2.77066	28.1693	0.68837	0.481954	0.0509897	0.0429909	0.380836	4.39181	6.15704	15.0059	6.14563
TCGA-DU-7018	935	1	649.484	6.89837	17.1517	44.4731	8.45997	0.820577	0.376187	1.70242	0	0.161775	0.012983	0.41474	0.0247758	9.70965	38.9098	33.3577	6.24551	0.0278965	12.8567	15.6847	13.7779	2.4874	10.4234	8.18125	23.561	18.4795	6.69621	0.476456	40.366	1.55995	0.232547	21.7349	0.370149	31.5118	3.76286	7.25245	1.94529	72.8925	0.718482	0.961022	0.0272671	0.114949	0.15737	3.34205	8.78109	4.70613	8.18473
TCGA-QH-A65V	386	0	352.946	3.23518	10.8066	17.2792	17.6501	2.4266	0.822821	5.89506	0.112096	0.163852	0.0116429	0.530652	0.0359727	9.01598	22.6824	24.2761	2.77057	0.0950646	9.19811	11.4619	4.90791	1.53261	9.49952	5.83351	25.2763	147.63	5.84935	0.225963	28.5697	4.14059	0.115578	20.4743	1.89681	34.752	12.3297	6.34855	2.53017	44.5108	0.525001	0.117522	0.0122263	0.900263	0.0498091	3.68019	8.1639	4.51849	10.4608
TCGA-DU-A6S3	658	0	501.533	3.08147	6.97883	28.1146	6.30389	1.61092	0.370079	1.56588	0.0101853	0.122826	0.019949	0.56116	0.0253794	10.6488	33.2032	21.5342	2.57688	0.110018	5.88016	19.5725	7.1133	1.34255	5.9137	5.10419	30.0085	47.5608	4.15336	1.25242	16.8319	2.51554	0.477144	39.4604	0.691423	32.7101	2.72412	4.87735	1.86487	33.9842	1.31183	0.704767	0.04888	0.0618184	0.276575	3.20743	5.78943	11.7989	7.33783
TCGA-DU-5872	534	0	448.168	4.08428	22.2888	33.6508	13.6349	3.79667	0.642948	26.0195	0	0.0523943	0.0116042	0.547069	0.0265735	11.7467	39.8584	25.1946	4.25312	0.209445	17.5964	12.5889	8.65422	1.64076	13.4868	4.60273	13.4139	28.2241	18.2197	0.186312	13.1495	2.43564	0.0876479	20.0341	2.95809	29.2213	19.3835	3.51473	2.50322	56.933	0.516121	0.0163983	0.0255899	0.0191783	0.169891	2.78411	9.35454	7.58149	7.75908
TCGA-S9-A7R3	3015	0	279.003	4.18384	8.8899	17.5619	13.7832	6.40269	0.855761	17.0133	0.0211971	0.0532535	0.012109	0.739146	0.026409	9.89625	29.603	22.446	4.03822	0.150907	15.6486	6.17485	5.22584	1.60313	10.6776	4.79851	20.2064	58.6045	5.08195	0.13246	19.075	7.06035	0.0470369	12.0621	2.18743	28.8237	8.84586	6.95857	3.43512	59.5943	0.678387	0.122226	0.0890102	6.5041	0.0978504	3.75547	8.82876	5.95104	7.06532
TCGA-S9-A6TW	1153	0	636.276	4.23136	25.6923	40.0675	13.3798	1.86573	0.337226	2.39711	0.0569525	0.324319	0.00929558	0.485453	0.031536	13.3731	30.6819	42.7561	2.29233	0.0932091	9.42419	17.2456	5.97952	1.72292	7.76795	5.08594	27.6211	18.9189	15.232	0.390335	22.3614	1.54737	0.163825	30.6975	0.540433	29.3809	48.9205	6.61949	1.89374	61.5793	0.689069	0.153253	0.0227765	0.435282	0.0670151	3.4615	6.33694	4.86864	10.1244
TCGA-S9-A7QY	865	0	358.549	3.46555	10.8817	23.7129	12.8457	2.00528	0.612376	3.23148	0.283266	0.0826434	0.0372852	1.334	0.106254	12.758	23.9246	22.7974	2.02432	0.215348	9.79346	15.0562	7.44325	1.72571	7.27656	5.08511	30.1222	130.942	3.38072	1.04623	34.7172	1.10319	0.193755	23.8164	1.29563	29.529	7.84378	5.58402	2.22227	41.9062	0.584878	0.372338	0.0383705	0.221838	0.153838	4.10007	7.6365	8.47112	8.23489
TCGA-DU-7008	4754	0	376.131	5.81867	4.40114	25.8235	10.2862	0.85214	0.624654	8.05611	0.405234	0.15014	0.0230491	0.636591	0.0152992	7.75451	55.7476	20.9952	3.76091	0.0482335	14.218	11.3846	9.38129	1.7115	18.1147	7.23897	25.0822	13.5653	6.60984	0.680724	13.2112	2.85974	0.178634	27.6047	1.49242	35.6763	6.80842	7.73893	2.32359	44.7441	0.881857	0.118013	0.00736645	0.256717	0.240084	3.41953	8.16652	8.71278	7.29776
TCGA-TQ-A7RN	1028	0	350.696	5.78959	12.6438	33.7164	10.5313	3.08028	0.383047	4.22349	0.035403	0.13045	0.0369814	2.05093	0.142616	8.54105	30.56	26.3037	4.51072	0.0660527	7.52787	19.4691	8.80813	2.41742	10.3183	7.30256	17.3363	46.3316	9.73255	0.488138	54.9946	1.55347	0.13268	16.254	1.16289	32.9653	5.16421	6.87268	2.48315	55.0199	1.28779	0.136094	0.0297327	0.959768	0.188423	3.09813	9.17848	8.58621	8.7802
TCGA-DH-A7UV	568	0	379.526	3.84065	7.08011	24.7747	13.7464	3.48445	0.543659	17.0817	0.0166251	0.0529053	0.0963289	1.47249	0.146716	9.54658	38.544	19.382	2.50348	0.0734639	15.2063	11.8682	5.51696	2.11235	11.7053	5.28382	23.4563	23.7322	6.3188	0.147456	1.62709	4.13148	0.0737832	8.79523	2.27082	29.7692	17.1225	6.12326	2.60773	41.1726	0.875964	0.0511272	0.0199462	0.582999	0.0722308	4.50069	7.43227	13.226	8.38018
TCGA-FG-7637	1022	0	419.449	6.58219	13.2999	34.9234	9.83819	1.49828	0.366591	2.20275	0	0.0400223	0.109205	0.594386	0.0281174	8.21366	35.3269	28.7098	8.15587	0.285489	13.4312	16.3766	12.8016	1.65921	12.2948	7.14131	11.282	29.3303	9.21007	0.17662	33.9869	1.85496	0.0510615	13.3127	0.963694	28.6206	5.99204	7.63261	2.20047	67.1098	0.348182	0.0734868	0	0.247091	0.0648872	2.54947	8.35536	6.65098	7.68672
TCGA-HT-7874	1132	0	162.95	5.08203	18.8595	23.9658	12.446	2.41765	0.386912	3.03596	0.0810932	0.0567976	0.024065	0.387314	0.0168388	9.77749	27.1994	20.7782	4.72842	0.383676	9.8208	5.82495	11.8835	1.35405	8.35761	9.69573	19.8932	74.5943	10.5703	1.40879	35.1898	1.45027	0.974265	85.9013	1.12198	20.5895	5.20782	7.88299	3.60454	43.7296	0.563944	0.453429	0.0265344	0.64133	0.564519	2.79466	7.28682	11.8603	7.08721
TCGA-DB-5280	1114	0	277.186	6.16944	13.4554	30.7224	14.8955	4.05488	0.483467	18.9395	0.0149692	0.0426216	0.015881	1.48416	0.11967	8.92539	44.0627	20.3331	4.6528	0.150668	19.761	14.4915	8.80564	2.44861	13.3152	7.16039	13.4947	20.5798	4.99376	0.211224	11.2654	2.49069	0.0479804	11.7086	1.90123	30.8516	12.4302	4.16017	3.40866	59.8267	1.11005	0.0748067	0.0314292	0.0201897	0.0650366	3.41331	10.4203	7.39671	7.98818
TCGA-HT-7875	12	0	300.954	5.24392	11.9676	22.883	10.5782	2.68005	0.540191	3.82476	0.142345	0.188343	0.0220714	0.769359	0.0192124	6.75536	26.5679	18.713	4.41671	0.597552	6.56061	20.7146	6.45452	2.13157	8.61095	7.94343	17.183	46.2423	6.44763	0.599701	58.0075	1.6313	0.210579	21.5423	0.970194	30.4155	4.55643	6.56633	3.4026	51.6099	0.722227	0.771541	0.0298866	0.0767949	0.131419	2.68256	7.12148	7.70799	7.7602
TCGA-VM-A8CA	413	0	551.131	2.3987	18.0908	15.481	12.848	6.3548	1.02668	7.26021	0.184753	0.25483	0.0124166	0.280432	0.0112833	13.7018	23.3368	25.6539	1.58464	0.0960464	8.48401	9.37073	4.52489	0.826624	4.92325	4.20014	45.21	45.3039	4.02648	1.04717	14.5495	3.67647	0.166132	50.7927	2.96291	28.7771	14.1826	5.70941	2.59029	25.7012	0.42416	0.350928	0.0065194	0.549671	0.354128	3.98978	7.86929	5.89221	7.97476
TCGA-E1-5305	2435	1	599.247	6.76963	15.6708	33.3405	16.6374	2.24156	0.530968	10.3504	0.0202338	0.105056	0.0247687	0.428039	0.00630224	9.68048	51.3683	25.0726	7.7731	0.134115	17.4225	19.6562	8.86249	1.90629	23.9138	8.20182	16.5916	31.0569	8.25092	0.407873	13.1729	4.58808	0.159642	30.2211	2.07695	26.2835	19.3359	5.11634	4.79457	72.5411	0.694942	0.108894	0	1.23489	0.274717	2.6494	10.8694	8.06201	7.90042
TCGA-CS-5395	641	1	212.189	6.54704	19.2377	16.6456	19.4157	4.78564	0.384784	12.9808	1.58014	0.114823	0.0109166	0.104952	0.0156244	6.53615	43.1296	8.74446	5.74335	0.0944125	19.28	19.2887	3.99727	2.45696	16.5772	7.94928	12.818	32.8768	35.913	0.21235	25.4967	1.62934	0.115436	15.3678	1.94981	33.1958	9.71094	7.5104	4.15161	37.204	0.287148	0.0835614	0.0351074	0.0225525	0.0590263	1.58241	5.23579	5.49552	7.56252
TCGA-DU-8158	157	1	195.62	3.13117	18.9187	19.1385	11.1272	5.26349	0.412961	27.5058	0	0.219993	0.00758879	0.528274	0.0808573	13.311	47.6878	10.6799	3.59279	0.154092	19.1902	12.8569	10.917	2.999	10.8889	6.21351	14.5116	109.619	26.9515	0.353812	24.9197	11.0238	0.0515872	13.5619	6.60531	22.5525	19.6894	4.44634	3.33344	32.9852	0.444593	0.218949	6.8753	3.8606	0.0441891	3.56401	11.0495	6.79504	8.53341
TCGA-E1-A7YN	729	1	185.403	4.71609	15.4151	19.573	16.783	7.07425	0.379314	22.1603	0.0469777	0.0944178	0.0345039	0.573343	0.107303	22.0359	61.6533	16.3218	3.09619	0.507436	15.8331	16.1039	12.1088	2.58855	12.6083	4.29261	17.8637	34.6698	15.1549	0.454548	3.40755	7.60778	0.0810794	20.5491	15.1351	24.2818	45.6608	7.82013	4.40383	52.074	1.04509	0.0180588	0.0281811	29.051	0.0382694	4.17428	5.13608	7.50545	10.0583
TCGA-S9-A7R4	916	0	323.235	5.53542	15.4837	26.3337	12.6946	2.63173	0.593358	20.4506	0.0102065	0.0376081	0.0316516	1.11754	0.0656999	10.3506	38.3948	24.2699	4.1989	0.125281	20.4778	9.02823	10.5427	1.76879	15.9791	6.72746	9.33043	15.0503	4.17257	0.275695	11.4541	5.41684	0.0805282	15.0552	4.40861	23.884	13.4323	7.70822	2.36425	59.2142	1.20302	0.141246	0.00612271	0.578172	0.0942311	2.63956	6.68149	6.87875	8.83667
TCGA-W9-A837	1555	0	293.22	4.266	16.0847	25.1889	11.7062	2.17142	0.598629	3.73438	0.083303	0.0837129	0.0244735	0.455084	0.0103786	9.50275	24.7357	24.7064	4.83328	0.175872	8.84012	10.8563	8.45883	1.53004	8.58361	8.54716	21.7081	63.1324	3.04105	0.842967	48.5346	1.7715	0.39435	42.863	1.21764	26.1421	4.64693	7.46171	3.15636	50.6769	0.702267	0.435509	0.0449748	0.69098	0.185486	2.9155	6.57453	9.4197	7.65763
TCGA-P5-A77X	107	0	195.445	4.00899	17.1068	21.6971	12.1285	2.41451	0.673406	2.53486	0.0347503	0.0669326	0.158811	0.418054	0.00180395	8.37498	21.5919	21.9884	3.85489	0.174884	9.18936	14.6436	8.37087	1.61819	6.39981	8.38656	18.984	46.5611	5.1396	0.963181	30.2918	0.80927	0.287028	38.3197	1.1795	27.9709	5.14867	7.59775	2.52253	41.5427	0.786638	0.227094	0.0312692	0.08788	0.188724	3.48469	7.22282	9.00526	9.28079
TCGA-DB-A75K	370	0	416.176	3.80665	15.1739	20.06	8.27802	1.53169	0.310584	7.28108	0.0334484	0.23249	0.0573229	1.9653	1.11301	15.6298	20.8463	19.2498	4.85898	0.0533734	6.02419	20.7456	5.00683	2.25865	5.97581	3.6971	30.255	42.0695	3.70649	1.63843	13.2511	5.90362	0.152569	18.0827	4.19331	39.4718	24.6368	4.66949	3.12008	31.2414	1.795	0.347165	0.0200651	0.902266	0.108992	5.17788	4.99944	12.3016	8.1479
TCGA-TQ-A7RM	1118	0	290.724	8.4448	13.2791	39.7914	15.1013	0.176092	0.515171	3.51961	0.0263107	0.89456	0.012883	1.11777	0.225363	9.19463	65.4826	17.931	3.45532	0.00322953	16.2069	39.9195	5.0188	3.3174	23.6118	6.18237	22.444	5.30679	8.18125	0.161763	5.01591	0.741722	0.0616278	10.4671	0.471727	36.7522	9.3435	8.19897	2.50598	23.9194	1.37602	0	0.0118375	0.0754087	0.0178612	4.27329	11.3444	10.2732	9.16542
TCGA-DH-A66B	1281	0	435.711	5.78791	5.41568	22.2679	14.3991	2.03389	0.347342	41.91	0	0.0992684	0.0249644	0.853361	0.0476404	8.77876	50.3746	30.6033	8.74291	0.103259	20.9004	5.41579	6.66106	2.2929	20.6527	6.64857	22.3319	3.49617	4.57387	0.184993	8.59181	4.63996	0.0471399	13.1184	7.97049	35.6209	24.0254	6.82457	3.01661	59.1793	1.14915	0.0146993	0.120427	0.0386803	0.0674916	4.88211	6.89876	6.20925	9.18374
TCGA-DB-A4XE	1141	0	409.938	4.87148	12.1892	28.6649	13.0487	2.68139	0.508539	11.8967	0.010859	0.109124	0.0513986	1.06276	0.0518612	8.96767	56.4444	20.6759	3.10545	0.117295	12.7357	24.3599	8.05041	2.66558	14.7229	8.17179	25.6066	48.2962	5.48799	1.40093	29.361	4.40553	0.133869	22.2564	2.35414	26.8376	8.83274	7.24738	2.8342	44.1035	0.6442	0.108533	0.0455988	0.36615	0.129742	3.23944	10.5162	7.65075	7.89209
TCGA-E1-A7YY	4447	1	183.891	4.12425	24.6371	24.5522	8.00188	2.41812	0.367803	3.93305	0.0239748	0.0481855	0.0860876	0.421718	0.0182537	18.4219	27.8234	25.3239	2.75709	0.415916	7.72025	3.75631	15.4615	0.918689	7.21858	9.28801	34.6973	28.5127	10.8151	2.45829	15.9441	1.12645	1.56449	137.889	3.02314	19.9071	4.60048	7.54224	4.41179	28.0288	0.261999	0.503819	0.00958803	0.414977	1.44526	3.57063	3.97872	19.6178	5.11916
TCGA-TQ-A7RH	488	0	547.74	4.98339	9.97931	25.4209	16.4514	1.9281	0.756259	24.0448	0.0859285	0.0690811	0.538558	0.920877	0.0695869	10.3794	41.8788	18.2294	2.8713	0.0928168	12.0048	15.3979	6.49074	1.99047	13.4764	5.37788	14.679	30.367	4.78099	0.75175	16.5164	5.23976	0.088983	11.6543	4.21024	27.0127	16.372	5.85922	2.69764	43.6235	0.979283	0.218011	0.0927846	0.567889	0.149333	4.17576	5.24192	11.1719	7.207
TCGA-DU-6406	514	1	295.265	6.19396	16.3964	24.3113	7.81013	2.49587	0.597898	18.5011	0.0217792	1.31075	0.00236981	0.313904	0.0105522	12.1185	55.6188	10.9229	3.78367	0.00712881	13.7302	31.1741	3.32768	3.6551	23.1612	8.00702	19.462	1.53696	22.8916	0.567803	4.24081	7.2698	0.0572783	9.07563	3.41	46.5069	8.18575	7.89782	3.83993	26.4796	0.793352	0.0948848	0.0174199	0.156664	0.0157706	2.7639	6.65183	7.76681	7.33576
TCGA-DU-7014	3573	1	936.22	5.65794	16.6237	38.3797	15.8052	1.45074	0.530432	12.7295	0	0.0655936	0.0113408	0.455213	0.0209862	7.19877	49.0637	28.3981	3.65538	0.0465208	18.6856	13.4361	5.89941	2.04741	15.0035	5.28171	20.4403	12.0689	7.19755	0.443113	8.0921	5.01314	0.0591825	13.3723	1.82241	23.5647	8.44715	5.83099	2.52045	51.5346	0.562098	0.0777028	0.0189463	0.200211	0.435673	2.86351	6.42629	6.19672	6.95486
TCGA-P5-A735	294	0	587.561	3.58961	13.9316	24.6269	9.70018	2.9879	0.546674	11.2529	0.0383236	0.0385122	0.0229352	0.825569	0.0557045	9.98694	58.8993	19.7464	2.26735	0.00627209	11.7535	22.7785	5.4855	1.87154	11.2809	5.25142	28.4353	38.8832	2.0506	0.396563	8.98345	3.73434	0.0692929	14.2588	3.47575	43.0645	14.1763	5.0152	2.58405	36.0236	0.658123	0.157142	0.0306529	0.0258444	0.083252	4.5404	6.91933	9.28494	8.29395
TCGA-FG-A6IZ	459	0	879.754	2.42912	17.6763	20.8444	7.11539	2.12722	0.893679	2.48772	0.097089	0.0780534	0.00792325	0.539425	0.0120961	14.042	44.7178	33.1291	1.24713	0.166842	5.71731	16.5616	4.54922	0.709105	5.3697	2.42729	75.1853	49.1183	2.89578	0.375766	17.0799	3.79613	0.076602	17.0366	0.733493	58.6386	10.7577	7.32738	3.0323	32.9195	0.924587	4.83696	0.029121	1.06723	0.0843641	7.12073	7.05113	7.7942	9.22987
TCGA-S9-A6U1	538	0	339.334	6.41284	9.26895	28.6672	14.5058	2.59227	0.62509	19.1449	0	0.118985	0.0356773	1.30001	0.105908	9.37184	56.171	22.585	3.36156	0.0626053	16.0229	25.3458	6.16366	1.99169	18.5606	6.38026	17.7255	51.656	5.27033	0.146877	17.3837	4.52677	0.0583862	12.4142	2.33849	33.5965	13.1077	6.80321	3.50573	57.2903	0.98821	0.175059	0.0327819	2.03303	0.0296781	3.17773	9.10588	8.25774	8.18068
TCGA-E1-5302	1527	1	426.421	5.53482	9.01021	22.7247	11.0834	3.3005	0.335219	16.2208	0.447728	0.122708	0.01993	0.546906	0.0321167	11.3434	58.1073	19.8452	4.98458	0.0999213	15.8563	4.57384	7.27107	3.10998	16.1671	6.99565	10.7771	32.4326	5.5473	0.728586	14.8303	9.58362	0.0642276	18.1453	5.72666	28.5387	20.7078	7.84258	3.82216	60.2973	0.571889	0.175242	0.0195334	18.7694	0.119367	2.77602	9.44129	5.80972	6.18565
TCGA-TM-A84Q	774	0	502.767	5.071	14.428	27.7023	14.066	1.7525	0.57294	21.5098	0.00806343	0.0918353	0.0105287	1.21654	0.107158	8.75882	44.5779	26.6058	6.44904	0.138565	16.186	19.3102	9.09646	3.09447	18.8674	7.48863	22.1317	23.6708	5.58036	0.143037	11.2719	3.45914	0.0596433	12.8858	5.75631	35.444	26.2558	5.75231	2.61719	55.1771	1.41619	0.173582	0.145113	0.0543775	0.113857	3.55229	7.63669	7.53155	8.78107
TCGA-DU-6395	1493	1	513.351	3.19857	12.5218	26.4277	11.2209	3.77147	0.436435	12.3201	0.0444264	0.0421647	0.196988	0.654088	0.0199875	10.2443	49.3661	20.2274	3.06219	0.101792	11.3221	23.5978	4.90951	2.92156	13.6414	6.88486	23.0059	32.8328	3.22064	0.205975	4.88392	4.20649	0.0328611	10.2295	1.67412	35.6064	22.6891	5.96682	3.40636	47.0607	0.624211	0.301712	0.00888353	0.0399465	0.0442334	3.39485	7.55488	6.08527	7.45473
TCGA-R8-A73M	1808	0	572.6	2.7844	11.1705	21.0073	8.73664	1.93896	0.873373	2.34154	0	0.209346	0.0117697	0.544814	0.0174692	12.0029	31.9225	26.6774	1.25695	0.0944142	6.19381	17.3152	5.10347	0.79988	6.23336	4.59108	52.5252	35.8428	2.52668	0.823712	18.6802	1.14901	0.0651919	23.7825	0.500047	51.0085	4.93897	6.40706	2.37833	33.296	0.816183	0.877812	0.00720969	0.137784	0.0652707	5.64111	6.70148	8.79349	11.8834
TCGA-DH-A66D	848	0	392.327	5.13299	12.688	27.8824	10.3356	2.14851	0.398771	18.9135	0.0164625	0.0413588	0.0376173	0.884039	0.0427298	11.0665	51.0083	22.1117	3.69706	0.149532	14.6123	19.016	5.58876	2.57548	14.3827	6.68922	14.9678	23.8533	5.54946	0.653745	16.006	5.1605	0.0771205	11.4204	6.20056	34.4298	23.1821	7.33047	3.0313	50.062	1.45851	0.208837	0.0493778	0.249792	0.0715243	3.44043	7.06368	10.3416	7.9379
TCGA-HT-8104	374	0	228.237	6.02345	11.9589	20.6934	16.064	5.06783	0.515073	10.5491	0.101795	0.375084	0.00996874	0.200355	0.0098641	10.6557	57.3462	11.0342	3.29397	0.0533115	15.7882	18.8747	7.69246	3.52234	18.5921	7.47539	14.934	82.866	54.8385	0.651159	13.8715	3.689	0.127165	22.2328	2.48918	40.8987	13.4313	9.27232	3.93468	34.6526	0.593294	0.0834798	0.0488519	0.160178	0.0958242	2.76083	5.93009	6.86872	8.93684
TCGA-HT-8012	288	0	312.366	3.06507	10.07	22.7477	8.2339	0.784501	0.531956	3.97397	0.1289	0.0503745	0.0385708	0.65091	0.0460965	7.20702	25.1589	20.6026	6.27743	0.298859	6.48659	15.2732	7.99193	2.16947	8.03624	6.95704	21.0906	14.8193	10.7536	1.14328	26.0615	1.50531	0.155376	14.6894	1.12515	32.0299	7.7584	6.56981	3.12392	43.9407	1.16268	0.699218	0.0128875	0.642292	0.147786	2.97562	8.49315	11.2363	6.35315
TCGA-TM-A84G	1238	0	307.224	5.11933	12.27	30.4383	9.85886	0.946994	0.607191	1.44515	0.0282001	0.113355	0.0306847	0.504782	0.0195189	11.7684	37.9431	25.9303	5.29281	0.152303	6.89211	20.2385	10.8018	4.23302	10.4064	6.80836	22.394	34.358	12.3853	0.288017	7.53419	1.42291	0.152965	14.4674	0.334494	41.1303	3.42394	8.0897	3.02276	59.8574	1.38678	1.82842	0	0.0316956	0.0561551	2.60226	10.117	9.55705	8.45879
TCGA-P5-A72X	405	0	309.175	3.40023	14.5552	19.8119	10.7119	4.29387	0.363974	6.1784	0.0281737	0.0440414	0.0291232	0.984605	0.0546016	10.289	41.8452	17.8812	2.72034	0.00922187	15.5262	12.7651	4.71425	1.81825	9.40525	5.10543	23.0247	26.5118	5.5656	0.283962	15.9198	2.69351	0.0740956	15.4032	1.90741	30.0528	11.4025	4.41461	2.07552	35.7633	1.09959	0.0433212	0.0338018	0	0.0306014	3.37619	6.9321	9.31873	7.96448
TCGA-HW-7489	255	0	272.385	4.23879	19.4154	26.3238	11.6286	2.73218	0.502757	6.23557	0.0153743	0.0437749	0.0263481	0.328812	0.0111735	11.5031	37.1683	23.8984	3.0507	0.354781	12.0342	9.95431	9.79514	1.72752	10.0308	7.60567	27.7198	33.1868	4.05615	1.65804	15.3461	3.36368	0.814995	77.2425	1.65809	26.628	7.72131	7.76321	4.20286	38.8562	0.612046	0.68557	0.0322797	1.18714	0.563596	3.59348	5.94644	14.7522	6.41912
TCGA-KT-A7W1	440	0	265.14	6.08343	10.6158	23.9618	9.51584	3.22517	0.661559	4.93952	0.0238641	1.0019	0.00129834	0.47155	0.0231248	16.2742	66.1132	12.6983	3.03261	0.0156225	18.1857	29.8623	3.469	2.50614	21.0118	6.75812	24.6369	2.64372	56.0892	0.62216	3.89909	5.85488	0.0666843	7.84701	1.88564	36.3697	8.32775	8.11148	3.08209	20.4487	0.670604	0.0244631	0.0143157	0.112653	0.0129602	2.98522	7.75087	7.89117	8.71318
TCGA-DU-7015	2763	0	609.595	4.94886	7.20299	25.7052	20.0605	2.55925	0.592821	39.7975	0.185147	0.053465	0.0104204	0.221141	0.00927988	7.06854	45.638	19.3824	4.99672	0.0344809	15.9363	14.3386	8.61675	2.77293	16.5943	7.54684	13.4729	15.9959	5.306	0.0875133	9.9596	6.67887	0.050372	9.18607	7.26641	29.2247	20.0459	6.91586	3.63522	67.6743	0.518287	0.0490847	0.030639	0.146385	0.0693452	2.0591	8.49513	5.07905	8.719
TCGA-HT-7686	1302	0	414.499	5.66198	15.0575	14.1989	10.4191	3.18194	0.312207	48.5712	0.00822693	0.08543	0.0335692	0.464737	0.0204996	12.6505	66.8067	20.7095	5.51054	0.141375	25.9526	16.9701	9.69991	3.207	17.2412	7.32069	11.4533	44.3316	7.56793	0.126037	24.7202	13.1844	0.0567958	12.1976	10.2868	25.5408	30.1271	8.53781	3.87605	60.8757	0.590804	0.0569257	0.00987038	1.8253	0.10723	2.37818	7.54694	4.55094	9.23953
TCGA-VW-A8FI	247	1	379.324	2.8111	11.0689	13.5298	12.3811	2.94836	1.46529	7.70003	0.197523	0.252254	0.0181344	0.685898	0.0692129	18.5142	60.243	9.39872	1.64202	0.0303064	16.4548	16.6778	3.35595	0.533522	12.2956	4.14625	39.6489	20.6998	8.17283	0.502685	4.99395	5.41704	0.0730516	8.04937	3.13591	24.8067	28.0809	7.35286	2.09479	14.7211	0.452912	0.0474565	0.00740567	0.774249	0.0335225	5.41509	3.95067	5.8781	7.63568
TCGA-S9-A6U6	491	0	365.003	5.12946	16.6388	27.4143	10.9651	3.71518	0.527145	7.92164	0.0183905	0.0554431	0.0390213	0.940547	0.0400968	11.7045	51.0251	23.5523	3.18632	0.103839	13.9633	12.8565	8.61418	1.58957	14.0709	5.78063	28.631	19.0815	3.71631	0.771089	8.02066	7.53437	0.149634	24.6329	1.93305	30.4093	13.1398	5.9375	2.61042	43.5976	0.882852	0.268643	0.0110322	0.95496	0.154808	4.16594	10.3191	10.7186	6.48936
TCGA-DB-5279	1356	0	309.165	4.02281	16.7189	18.6636	13.9789	5.42685	0.340807	6.41493	0.129349	0.0273654	0.014445	0.275374	0.00989541	8.69181	20.6228	21.9663	7.21302	0.254033	9.19634	7.99274	7.89457	1.45342	8.55534	7.08218	17.7407	22.8416	6.31188	0.356804	56.6254	1.44774	0.184639	32.2135	1.06964	29.9915	7.65891	8.07794	3.58361	50.8864	0.462325	0.392554	0.00816783	0.564697	0.177468	2.13829	10.481	5.58953	7.43423
TCGA-VM-A8CE	1095	0	333.45	3.86601	6.92852	22.7651	12.8486	2.32245	0.533796	4.49575	0.0178676	0.284296	0.0291629	1.1111	0.0612176	9.93052	24.0491	19.2689	3.38649	0.197386	7.5827	15.9486	5.96909	1.40151	8.77494	6.4582	21.6867	109.61	6.01619	0.262927	54.2131	2.82512	0.083703	13.7875	1.9759	29.8599	14.7157	5.89789	2.89556	43.9367	0.920511	0.0824225	0.0107185	0.0783213	0.0242591	3.14373	8.31613	8.35411	9.26024
TCGA-HT-7854	294	0	216.044	6.06146	12.7148	15.5003	19.6002	4.98059	0.518113	15.9079	0.0373069	0.0874778	0.0462771	0.39027	0.0681706	7.72282	30.0356	16.3895	4.68368	0.0879219	14.5115	6.7471	7.53137	2.2572	10.7738	7.36768	12.8776	40.1832	11.4498	0.114309	21.2043	10.2565	0.143494	18.4355	6.89506	17.918	22.3505	6.77975	3.89485	45.163	0.471761	0.0803109	0.0179038	9.54019	0.109408	2.43486	5.71935	6.87909	8.03069
TCGA-DU-6542	75	0	355.612	5.67814	15.1417	30.3494	9.51241	2.02989	0.425102	29.0398	0.00957247	0.169946	0.00624953	0.720995	0.0834831	9.7445	51.5827	24.6567	6.18749	0.145698	17.9842	22.4671	11.6398	2.51111	16.6384	7.05105	15.7304	39.1693	5.40287	0.355049	24.9983	5.05687	0.141611	25.6433	7.11657	29.4686	13.5	3.97566	3.29287	62.0194	0.829402	0.110393	3.56026	0.258216	0.202748	3.31119	7.05037	10.7241	7.21296
TCGA-VW-A7QS	708	0	351.5	5.70804	23.6717	38.9346	14.1196	1.14151	0.825514	1.2854	0.0821565	0.44644	0.0163891	2.53802	7.76968	15.4742	25.7233	39.1996	3.5415	0.0134458	7.89159	17.8685	8.83639	1.42022	9.24269	7.7145	28.031	7.24723	8.57454	1.39849	33.5378	3.64193	0.0765243	57.1285	0.914529	32.845	52.7822	8.2097	2.38465	55.8801	0.933445	0.329857	0.00547603	0.615601	0.128896	5.856	11.1744	9.84943	10.9384
TCGA-DH-5140	609	1	278.35	5.17392	16.416	25.2642	6.37812	1.22988	0.74695	7.61536	0.00746041	0.424837	0.00487064	0.471732	0.0108439	11.0981	61.2756	15.7084	4.79477	0.0183147	14.8801	13.7363	4.20572	2.06346	20.0451	8.90015	20.2218	18.1778	11.2725	0.523345	37.6557	4.94241	0.0772561	12.5254	2.2259	34.5513	9.34953	8.95628	3.1441	39.2189	0.710462	0.045886	0.0134261	0.442736	0.162066	2.78147	11.5098	10.3623	8.72019
TCGA-HT-7601	155	0	173.837	5.08916	13.8776	18.9129	12.0385	2.38714	0.310091	62.622	0.00800095	0.152766	0.0979414	0.610069	0.0515025	13.88	49.0634	15.7774	3.70646	0.30641	16.1668	14.4534	8.34088	2.56566	18.1043	7.79979	10.3456	90.2697	6.8256	0.145154	20.537	6.79113	0.0473449	19.3912	12.6367	27.5195	31.7316	7.01378	4.07847	79.7871	0.562085	0.0307566	0.0191985	0.113308	0.0477971	2.47821	7.87811	4.98642	9.29853
TCGA-DU-7298	578	1	386.854	9.72157	18	35.3525	17.3776	1.43867	0.575795	15.9992	0	0.231637	0.0599597	0.577708	0.0388888	8.05442	74.4671	25.4896	6.37997	0.116709	16.2285	15.0004	8.62129	2.45616	22.0254	8.65777	17.089	67.4774	8.39605	0.270075	13.1786	4.19372	0.131425	25.0792	3.78962	32.2885	14.2135	6.59725	3.08067	57.5412	0.747817	0.132912	0.0172843	0.6995	0.168214	2.71495	6.94854	9.98383	10.0972
TCGA-S9-A7QX	401	0	844.678	4.22532	14.8321	27.8781	16.6043	3.01254	0.778742	14.3441	0.019683	0.0659328	0.00642516	0.800741	0.0715244	10.1701	67.1932	28.5628	3.65582	0.033824	17.345	3.75274	6.95147	1.68426	18.3979	4.19155	14.72	25.148	9.39968	0.122998	6.38707	8.73936	0.0679421	8.00868	3.84685	31.5257	13.4115	5.70912	2.59821	46.016	0.8143	0.0680974	0.0354224	2.35607	0.0481029	3.80569	8.6317	6.10444	8.14573
TCGA-HT-A4DV	794	0	299.761	2.70806	16.1318	19.3669	15.6073	2.52722	0.471688	4.87995	0.0182557	0.214031	0.0268166	0.802089	0.0682332	12.3121	26.3686	21.1247	1.95679	0.259934	8.61368	11.5168	6.09001	1.06509	7.71704	4.86524	35.8505	192.157	2.4058	0.551995	19.1173	4.77723	0.234057	45.5057	2.32863	34.9785	10.1061	6.02598	2.93312	36.5287	0.513001	0.350885	0.0219025	1.46502	0.138801	4.85523	5.64969	8.03086	11.3524
TCGA-FG-A60J	451	0	329.848	5.1389	13.117	28.5524	14.1465	3.41442	0.613141	11.4827	0.0804039	0.0418961	0.00874882	2.4901	0.313507	8.93693	44.9488	23.16	2.77974	0.381611	13.586	23.2669	6.58616	2.22388	13.3879	5.09658	23.9006	52.1468	5.50729	0.702337	50.0506	4.53879	0.123351	14.0584	3.39423	30.1459	14.9659	5.64865	2.82739	42.3846	1.22037	0.64564	0.0160776	1.12662	0.0824805	3.19959	6.29019	8.00878	7.34367
TCGA-HT-8111	9	0	187.319	4.24367	9.95516	21.1117	23.4713	4.19064	0.332054	20.5357	0.00734367	0.132837	0.0323624	0.872363	0.0792943	9.78425	45.9935	18.3058	3.58044	0.219943	13.3039	11.5935	5.90013	1.67572	14.6419	6.22873	14.6641	96.078	6.20023	0.136191	41.1272	9.64014	0.0941536	15.9918	5.03745	26.5865	18.3503	6.0886	3.00663	49.9798	0.710809	0.05646	2.141	3.0358	0.0877412	2.95762	6.35162	5.86191	9.56284
TCGA-HT-7681	1361	0	310.98	3.91689	18.4923	23.0658	13.9999	3.3584	0.491017	9.57425	0.0206143	0.151915	0.0269167	0.536722	0.0235427	9.20991	31.8404	25.2238	2.50482	0.430154	10.2816	14.3202	8.0186	1.51451	8.6573	7.84873	24.8275	48.9528	4.84883	0.868482	27.478	2.21715	0.574337	63.8969	2.14422	31.6295	18.4042	7.89602	3.76957	50.056	0.635599	0.190185	0.086563	0.250231	0.195918	3.84281	9.30477	8.32149	9.24753
TCGA-HT-A616	57	0	590.491	4.65218	17.8168	20.0947	27.1432	2.86717	0.569643	4.99751	0.0526491	0.0881804	0.0446846	0.340251	0.0371703	7.46683	31.8034	23.7457	2.91079	0.0930595	12.6992	1.95025	11.5738	0.823671	14.0543	7.92408	23.775	28.4458	6.40668	0.857529	9.6034	3.57505	0.565976	54.9966	1.13562	25.4638	6.75008	8.86621	2.71178	41.9706	0.608235	0.242868	0.0126333	0.333748	0.228744	2.9723	5.44449	13.0656	7.4136
TCGA-HT-8113	902	0	149.853	3.98234	23.5678	26.2728	10.3952	2.0263	0.390746	1.91384	0.0365235	0.0856408	0.0104321	0.405423	0.0227519	11.5722	29.156	22.6684	3.30665	0.564871	9.16658	3.93653	12.0765	0.943113	7.443	9.61881	24.096	55.8595	11.6878	2.30811	23.0892	0.912116	1.31476	130.37	0.869777	19.726	3.47321	8.45709	4.05285	35.1786	0.470407	0.786244	0.0328647	0.89901	0.932261	4.04489	4.40032	14.8735	6.76427
TCGA-HT-7873	300	0	371.322	6.32726	12.5947	24.6055	22.5108	2.39412	0.526146	14.9826	0.0454624	0.185282	0.0222606	1.25061	0.0739476	7.30442	50.8668	16.9993	3.68765	0.104166	16.8324	8.96658	4.90099	4.28314	17.6946	19.2674	8.85446	44.6413	12.1217	0.183286	14.3137	3.62198	0.100882	6.4532	3.70424	24.9755	13.8833	7.22539	2.90249	67.4237	1.08235	0.0699052	0.13636	0.255488	0.0946447	3.4019	10.1067	9.26959	8.61348
TCGA-HW-8320	274	0	471.097	5.94107	16.2362	35.8821	13.9649	2.20878	0.588124	18.3748	0.0712552	0.0583455	0.0323056	1.70247	0.213719	8.0203	47.6016	21.8286	4.78603	0.0505341	17.0819	2.9697	8.5258	2.93572	16.6321	6.24363	14.484	25.7974	7.40399	0.070222	11.8117	3.71667	0.0936992	12.1653	2.66994	31.9858	16.6913	6.04883	3.11517	53.0194	0.896107	0.133913	0.0807401	0.181532	0.150491	3.32641	8.20869	9.62626	6.39961
TCGA-HT-A74J	322	0	538.902	3.81803	13.7994	22.0791	13.8576	3.46812	0.473723	10.5427	0.0733377	0.11669	0.0463834	1.21685	0.236039	9.61965	41.5918	16.9581	2.65943	0.121526	10.6614	3.54319	6.56858	1.65999	10.5063	4.55809	31.1789	25.3505	5.13378	0.698514	4.69715	5.3765	0.162739	24.2874	3.10151	32.8947	12.0956	5.00543	2.46046	30.6927	0.801444	0.345351	0.0989865	1.00768	0.164293	3.90394	8.44172	13.8796	6.68705
TCGA-RY-A845	598	0	322.361	5.13018	12.9489	21.3369	11.1909	3.14663	0.729533	10.4677	0.0340951	0.0885125	0.164164	0.632101	0.0407085	8.88345	45.292	19.6713	3.83399	0.196697	14.0732	12.0769	7.04905	1.96342	14.6631	6.91741	25.0099	22.4108	5.28103	0.625432	6.83535	4.47676	0.0798613	19.6818	3.03314	33.3487	10.3275	7.31359	3.0543	47.4972	0.66535	0.144173	0.0920388	1.60375	0.124987	3.69019	10.1093	8.3047	7.96081
TCGA-P5-A736	232	0	364.645	2.22043	8.19239	12.5436	11.2409	7.42456	0.384741	17.3042	0.0709679	0.0169803	0.0148926	0.480792	0.0378932	14.2109	34.5225	14.0237	2.07221	0.089599	15.1909	7.3163	4.20178	1.80078	5.43966	4.07129	28.1838	26.0199	2.63799	0.098096	17.7546	15.5143	0.0499936	14.2286	7.88132	27.1811	30.1798	4.74483	3.29766	34.2535	0.340291	0.0545619	0.0668994	1.45627	0.0385416	3.39939	6.3573	5.29804	7.4733
TCGA-DU-6394	684	1	350.192	7.35977	1.23749	33.0204	8.54974	0.400905	0.358238	6.92876	0	0.239084	0.0146929	0.497764	0.0280389	17.6863	27.4955	26.4648	9.19575	0.179952	6.89474	23.1914	15.1913	4.07106	10.8282	7.86698	19.0721	11.0791	7.56981	0.267011	54.0128	1.92303	0.0792696	25.2258	1.658	33.9689	7.15747	7.07165	2.97596	64.1703	0.938589	0.67233	0.0115719	0.0433627	0.10127	2.37285	7.24378	5.75741	8.34309
TCGA-HT-A74K	469	0	1137.39	1.69685	20.3424	17.1406	8.1657	2.54914	0.754857	4.63054	0	1.74752	0.109261	0.584915	0.560808	15.0789	34.542	24.9689	1.17704	0.0623351	4.96907	13.8739	3.40574	0.653428	5.71064	2.57567	87.3579	86.4062	7.95173	0.874796	13.2114	5.72939	0.0398402	18.2888	1.09943	49.1168	42.2662	4.41198	1.92111	21.7829	0.26127	0.0976097	0.0276949	2.07818	0.0626817	7.07144	5.51851	5.23844	10.7833
TCGA-TQ-A7RI	64	0	279.385	4.91388	11.5664	21.2051	10.8129	2.07792	0.426205	7.3494	0.33338	0.223347	0.0241836	0.891253	0.0403815	8.90695	23.2519	20.6425	5.09774	0.145497	7.50938	9.37336	7.07469	2.16515	9.33814	7.75359	19.4404	82.0738	4.79525	0.713094	28.0167	2.9398	0.13243	12.7471	1.81496	25.7631	8.60978	6.71156	3.02929	48.2139	0.621661	0.121036	0.0111105	5.63929	0.181054	3.20582	8.31492	8.1352	7.94649
TCGA-DU-6400	39	1	563.901	4.32868	10.0136	31.3647	8.14033	1.12369	0.602187	2.6938	0.125345	0.287613	0.0306876	0.498273	0.0403427	10.3755	35.2132	26.4013	5.8964	0.480031	6.47361	18.465	8.25919	3.52378	8.31034	6.48475	27.5835	6.40261	4.71052	0.750431	20.6745	1.82825	0.216335	27.2427	0.854327	38.9887	6.81127	6.83755	2.53115	48.43	1.14475	3.1368	0.00751924	0.667782	0.197412	2.77123	8.73906	9.63868	7.21876
TCGA-S9-A6WG	2439	0	386.991	3.59999	13.3499	22.0333	9.41516	2.90637	0.429808	19.8165	0.0102368	0.644663	0.0217206	0.894778	0.0807743	13.1542	41.504	19.8388	2.89864	0.130679	13.1739	12.592	7.5761	1.91118	9.98896	5.07273	25.0752	7.2241	7.12686	0.858427	4.17236	10.8156	0.0706712	13.8839	5.43604	25.172	38.2261	6.12352	2.50379	35.2372	1.31047	0.0865733	0.0368452	0.331364	0.150105	3.9335	6.62383	8.71255	7.17308
TCGA-S9-A6WQ	430	0	473.784	3.83516	14.2462	14.1019	14.4149	3.76013	0.545507	21.655	0.0450404	0.0362096	0.0235242	0.799942	0.0598559	13.0681	44.3365	25.695	2.25167	0.212295	12.1441	15.3521	5.34773	1.57278	9.55488	3.35796	29.963	115.328	3.23483	0.239691	14.8423	8.63415	0.0621885	16.9071	5.34574	38.5497	17.7291	5.70029	3.18827	40.4011	0.759405	0.505571	0.0432303	2.18085	0.0587058	3.5716	6.54702	4.41971	10.0927
TCGA-HT-7606	528	0	368.733	7.72605	26.4879	30.7771	11.2309	1.36398	0.594928	9.29316	0.00783843	0.659043	0.0102349	0.446436	0.0309249	10.9311	77.9528	31.8423	5.91533	0.0384854	26.7661	22.659	10.5343	2.40515	25.2773	11.9728	27.3675	19.8651	42.622	0.979642	33.1661	3.42507	0.0386527	14.3817	2.71202	34.3188	10.1095	4.99254	1.74322	47.5513	0.489483	0.0602639	0.0564257	0.200869	0.31927	4.87068	7.04437	8.49955	8.94203
TCGA-HT-7470	270	0	228.178	4.84115	14.4119	20.4777	12.2906	2.03058	0.21465	8.36524	0.0139917	0.060929	0.0319714	0.470004	0.0363166	9.70213	37.6259	18.9244	4.15313	0.140828	16.2636	12.6922	8.69601	1.82008	12.7378	8.63939	17.6989	70.0782	11.8928	0.795363	13.6122	2.45666	0.231135	46.4574	1.98005	24.6549	10.1929	6.77595	3.22164	52.0078	0.513317	0.220522	0.142687	0.0566136	0.174769	2.43704	8.9457	8.68997	8.70315
TCGA-HT-7468	205	0	321.477	3.48647	1.97132	29.9637	10.8381	1.69181	0.567509	7.33488	0.00732141	0.299202	0.0227045	0.403373	0.0304054	7.46105	34.6135	23.4329	8.96447	0.269602	8.33293	26.9721	7.42738	2.70846	11.2573	10.3006	16.805	27.607	5.10665	0.185956	32.7325	1.88001	0.0649857	11.1634	1.41086	26.9551	7.15501	8.328	3.09398	66.6808	0.62293	0.185753	0.0219599	0.493735	0.0556661	2.48674	10.3059	5.34894	9.86168
TCGA-DU-A5TU	798	0	525.112	3.93055	16.754	13.8699	9.55711	3.69535	0.919471	19.001	0.0100775	0.0641383	0.026317	0.498995	0.0732397	18.6697	50.9877	21.5027	1.93734	0.0791662	14.6216	22.3245	5.03951	5.70965	13.5015	8.68559	24.907	12.7578	4.27637	0.674431	7.27996	6.83677	0.0646021	17.0382	10.3664	35.012	37.5371	8.17821	4.37751	38.9771	0.81023	0.0697305	0.0362719	0.23786	0.164188	5.36312	7.70833	18.6037	8.41853
TCGA-HT-A618	514	0	284.561	4.82807	14.427	14.2328	13.876	4.73999	0.339275	42.1341	0	0.0617936	0.0401454	0.671851	0.11066	12.9887	50.0326	22.0527	3.87817	0.125796	25.1658	17.5565	7.85228	1.95766	20.3442	7.37992	13.4324	34.4051	9.91314	0.32641	8.0053	8.84957	0.0909669	13.5113	13.0502	22.1906	30.3774	9.03168	3.59413	51.449	0.959975	0.0236379	0.0737748	0.311009	0.150277	4.16654	7.24081	5.13834	11.8318
TCGA-P5-A5F2	244	0	284.222	3.62942	11.547	19.1043	15.545	4.70949	0.82516	2.80656	0.136963	0.0776413	0.0275133	0.756801	0.0415661	14.2516	27.7952	22.5791	5.01781	0.0413825	16.268	6.31309	7.00914	1.47978	8.28343	6.88545	24.171	28.705	5.21817	0.649871	12.5409	2.63433	0.187031	36.4331	1.90336	28.235	9.47319	3.64639	3.95542	35.4536	0.863509	0.170101	0.0316006	0.859696	0.102991	4.57836	6.8542	12.1707	6.7347
TCGA-FG-A70Y	870	0	217.127	3.60446	15.1732	21.9178	26.7329	4.10464	0.588492	14.1942	0.00888833	0.0595471	0.00870433	0.993868	0.0664428	11.1474	52.9201	25.3599	2.5766	0.0960085	14.072	5.80098	5.09557	1.41743	14.564	5.4435	27.8907	101.797	4.17677	0.204254	10.4713	7.66962	0.0832768	12.3995	3.33317	27.6713	17.5387	5.68421	3.53835	46.7743	0.666054	0.0341679	0.0106639	1.19881	0.0675797	3.17365	8.65337	5.59433	9.49822
TCGA-QH-A6CY	410	0	251	4.05692	19.2374	22.7216	15.0604	1.75517	0.575737	3.16505	0.163227	0.115109	0.0490762	0.417397	0.014271	10.6703	25.4564	25.6034	3.53425	0.14763	9.2054	11.4009	9.13913	1.62989	8.22915	8.41816	24.0147	105.448	8.93258	0.803533	23.7977	1.88483	0.593086	57.5636	1.3498	24.861	7.15565	7.60196	3.22333	38.9903	0.523061	0.323641	0.0206142	0.110076	0.11664	3.10717	6.28099	7.64147	10.0617
TCGA-WY-A85A	1322	0	305.81	4.60338	15.8543	24.8255	13.0995	4.08855	0.500712	8.3891	0	0.0548712	0.0152777	0.815999	0.0315845	8.44514	45.9241	23.4192	3.13793	0.0689371	15.2475	19.0241	5.59043	1.26415	14.6717	6.51791	24.4466	19.3092	5.51341	0.43398	11.5944	1.95758	0.0634671	14.9427	3.92016	29.9911	12.0406	5.99578	3.28105	43.5383	0.876788	0.026987	0.0350947	0.00789051	0.146151	3.6973	8.8644	7.87622	8.85167
TCGA-VM-A8CD	242	1	239.69	3.5293	32.7412	32.4783	10.7511	3.51395	0.305193	13.8372	0	0.0943392	0.00725793	0.289448	0.027701	20.7934	65.3425	15.3802	5.24568	0.0327497	16.3549	16.7489	5.19486	3.68341	11.4194	5.2229	31.4842	28.3119	38.1967	0.358554	22.6337	6.49962	0.0804027	27.7644	4.95405	31.5838	17.6951	3.97014	2.82702	21.7753	0.503309	0.0512823	0.00444594	0.599762	0.197225	3.73664	3.62775	5.50417	9.27703
TCGA-E1-5303	2054	1	615.533	3.43833	12.8045	21.9788	17.6375	3.39114	0.477365	26.9487	0.0264722	0.162571	0.0115219	1.73336	0.0879499	11.4651	44.1902	22.9839	4.4975	0.151636	14.5061	10.4972	6.99964	2.37199	13.4381	4.77242	21.7799	72.6282	2.67528	0.0818225	9.60399	11.4645	0.0217565	9.90881	6.36211	23.4037	34.6664	6.46359	3.83915	60.0197	0.420162	0.0949782	0.0211736	4.90933	0.0910521	2.68517	6.64463	4.71547	8.55676
TCGA-HT-7482	1828	0	357.527	4.51171	13.3253	19.9201	26.2622	2.33059	0.563716	31.8201	0.0730631	0.146845	0.0145751	0.60768	0.0674281	7.91987	40.8394	20.852	4.15707	0.235166	18.6351	10.3439	6.8557	1.65246	17.2553	6.58366	19.5725	78.8157	4.4643	0.0818223	28.4237	7.47765	0.00800637	10.942	3.51988	23.6912	28.2398	6.4623	3.34059	64.545	0.253474	0.212208	0.00973983	0.164239	0.0617236	2.44386	8.10758	3.14853	9.9474
TCGA-FG-A4MX	571	0	486.671	2.23642	8.05625	12.5021	8.245	3.37819	1.60263	2.25235	0.0556497	0.155343	0.0454147	3.12639	0.685626	12.5923	39.8073	13.6402	1.82733	0.0819693	13.277	14.4933	6.62512	0.785637	10.2168	3.34073	36.5918	4.72768	3.36189	0.299142	4.86393	3.09216	0.064031	12.3763	1.72639	21.8149	36.3354	4.81991	1.64672	18.9812	0.781904	0.270971	0.0222555	0.225172	0.110816	7.81388	3.73023	12.5018	4.34513
TCGA-TM-A7C4	1472	0	250.088	4.65807	19.1386	22.4698	11.8708	2.43093	0.485651	4.9594	0.0211044	0.0459512	0.0585579	0.654964	0.0284847	8.7724	38.4166	20.3585	2.9994	0.160609	12.8014	11.9563	9.5864	1.81045	11.9386	9.14783	20.304	20.6771	5.43948	1.27626	15.7298	1.1511	0.411074	44.9885	1.62329	20.4762	6.46875	6.52478	2.9688	37.3055	0.411842	0.462429	0.101281	0.0142322	0.263614	3.48365	6.76232	10.7086	7.92652
TCGA-DB-5274	2291	0	2022.78	2.64925	18.4366	19.1799	6.9238	1.45796	1.86807	6.28629	0	0.48348	0.0103931	0.439149	0.0176297	5.05994	26.0479	36.3513	1.62575	0.0468962	7.01152	13.6271	4.80045	0.19722	9.07475	3.39226	48.6376	40.7567	4.84423	0.222489	8.8611	3.23248	0	17.9879	0.639099	39.2457	69.4472	6.04142	2.24736	38.1572	0.339649	0.473243	0.0190992	1.83218	0.109509	6.12129	5.55622	4.62594	10.5821
TCGA-RY-A843	65	0	207.128	5.04376	22.9047	29.2018	13.4347	4.13496	0.444093	7.35657	0.0628577	0.0789588	0.0371903	0.812815	0.0228414	8.80735	35.8051	25.8175	3.56827	0.0887285	12.5747	6.9909	7.44571	1.34468	14.5694	7.44433	22.8118	33.6118	5.86689	0.487827	45.1791	4.00629	0.228597	34.7497	2.77444	24.0048	6.59122	6.15314	2.53209	52.165	0.631719	0.114776	0.00942681	3.12623	0.064007	2.99351	9.478	7.41064	7.82399
TCGA-S9-A7IX	681	0	292.179	3.78866	17.074	22.4086	10.5681	4.9738	0.546082	24.1536	0.0601172	0.201377	0.0527401	0.394803	0.0156039	11.4352	33.5715	18.0372	3.83827	0.0368957	16.3593	17.4307	12.1994	2.05248	11.3095	6.96426	29.4069	21.4506	12.7806	0.563505	5.39485	5.76586	0.251981	30.6708	6.6193	26.6792	12.0462	6.80098	3.06794	30.3287	0.586579	0.155991	0.0180316	1.13009	0.0979463	3.12866	6.37967	14.6834	7.59838
TCGA-HT-7882	115	1	279.211	5.26727	14.8346	18.5388	9.92363	2.45908	0.339972	40.4449	0.00842106	2.42874	0.0810928	0.227085	0.0157375	16.7136	62.2724	14.9574	4.73611	0.103365	15.1418	10.6032	20.1766	4.1743	20.0598	7.28855	11.7792	7.54286	51.4609	0.879311	6.5933	16.4939	0.0498309	11.173	24.1525	21.1553	446.776	7.93016	4.11936	63.2438	0.736212	0	0.0151549	1.16986	0.0457335	2.53735	15.7823	8.84878	9.76426
TCGA-QH-A6CZ	281	0	247.561	4.85524	13.2026	26.8175	12.497	1.04241	0.550835	3.38368	0.00921898	0.0586742	0.0210656	0.379332	0.0114858	9.44049	26.0417	30.059	5.14886	0.167475	7.98114	13.8128	9.69283	1.80084	8.00143	8.16737	23.7294	35.6502	4.9766	0.661575	41.1653	1.74014	0.381868	50.1927	1.03967	27.9549	4.69651	8.04343	3.48243	51.2604	0.654851	0.219721	0.0331818	0.130558	0.135181	3.58252	7.95615	8.5985	8.65631
TCGA-FG-A87N	415	0	406.268	7.76903	16.499	35.5789	6.88364	1.25106	0.297943	7.27929	0	0.229185	0.259728	0.766664	0.0287331	12.3585	92.8057	36.31	4.75389	0.203819	15.1856	20.0451	6.87867	2.15285	18.951	8.17354	30.0494	12.5088	14.4738	0.746926	17.9612	3.70775	0.109934	26.9208	2.20107	29.7596	11.4225	6.69531	2.84171	45.5311	1.09213	0.236413	0.0322811	0.886503	0.229623	3.21316	7.84581	10.4198	7.79883
TCGA-HT-7877	6	0	244.812	5.60929	13.725	20.7973	12.0533	1.59963	0.380083	2.68461	0.02769	0.153044	0.0361557	0.595426	0.0244364	7.5881	21.3656	18.0159	6.56243	0.367074	7.43466	11.4745	8.82519	1.45097	9.1474	7.82286	19.5796	66.9652	17.0141	1.0075	38.0162	1.94727	0.24578	29.9743	1.48179	23.8515	3.32087	6.74424	3.03743	46.1326	0.918606	0.21821	0.0166107	0.793618	0.124064	2.83129	9.2467	9.7081	7.89251
TCGA-S9-A6WD	2116	0	591.466	3.07302	13.2902	28.628	14.3404	2.20707	0.590944	5.56698	0.00892536	0.074744	0.0218515	0.504191	0.0481864	10.6042	32.1313	33.8917	3.22061	0.508336	9.51549	14.4239	9.93813	1.82449	8.33649	5.81811	22.7574	63.6608	4.9244	0.640504	40.0162	2.12231	0.154044	22.4436	1.1678	35.8745	7.45695	6.49168	2.55856	61.7186	0.606126	1.66748	0.0696042	0.662092	0.0436251	2.92473	8.68942	6.97354	9.24849
TCGA-QH-A6CS	590	0	181.469	2.71333	33.3858	35.4477	17.2684	12.2174	0.589921	8.26872	0.0101474	0.180153	0.0331244	1.49321	0.109568	10.5588	51.7047	16.2279	1.47079	0.109608	21.3797	10.8132	5.59774	2.2234	8.23437	4.28211	21.8051	247.319	30.3813	0.392737	3.60833	7.4812	0.0300232	33.6801	5.29413	25.0789	13.9059	3.86848	3.63374	28.925	0.396043	0.0858173	0.00608725	0.773273	0	3.80533	8.15949	5.43354	10.1079
TCGA-P5-A77W	586	0	896.238	4.40154	11.6257	46.8839	10.2915	0.536653	0.40127	1.81671	0.0244411	0.103704	0.0239351	0.422345	0.0676682	7.52645	35.6843	40.7285	3.35518	0.220003	14.2084	23.0693	10.5756	2.4259	9.46048	7.44553	20.3152	22.2011	12.175	0.420422	24.3755	0.529244	0.0682966	20.4247	0.553055	29.4463	4.79373	7.00717	1.49355	55.5452	0.858522	0.645155	0.019549	0.0769179	0.115038	2.85357	7.38557	6.85305	7.432
TCGA-DB-A4XG	2221	0	355.871	7.41663	17.1074	32.9427	12.2275	1.06112	0.700951	0.945871	0.00868123	0.186111	0.0198369	0.89604	0.0270394	8.7321	34.8804	27.0201	5.74138	0.140657	10.5167	23.3614	10.9734	2.19853	10.1206	7.82448	17.0386	18.2797	2.85224	0.661484	35.3214	0.771436	0.111302	30.2837	0.451494	32.8146	4.87218	8.4263	3.21708	66.7275	1.03679	0.780899	0.0312463	0.784487	0.245162	3.20593	10.2045	8.32995	8.05275
TCGA-DB-A64L	738	0	306.535	7.18321	17.9581	27.5578	14.6931	1.98158	0.647635	3.7281	0.0650344	0.0290464	0.0194602	0.48127	0.00900279	10.1984	29.3122	29.8374	4.32978	0.239481	10.2365	13.1473	10.3749	1.41466	8.09915	6.93221	19.7338	19.3451	8.26178	1.56878	14.8646	2.32493	0.571908	49.7453	2.04719	30.5548	11.872	9.08179	2.96181	45.8729	0.888381	0.533334	0.0195065	1.68851	0.276667	2.98	5.98231	11.7474	8.19272
TCGA-VM-A8CF	611	0	1122.53	1.69429	16.6684	11.3121	17.9701	6.39213	0.977631	16.7061	0	0.154019	0.00250153	0.537999	0.0222774	11.6445	22.8974	18.7093	1.42998	0.0903003	10.6985	5.58981	2.00025	0.364299	6.81645	2.46447	40.1927	60.0938	1.92057	0.154475	4.83746	15.7892	0.00755774	9.58006	6.77114	29.1497	22.5257	4.56821	3.15694	24.8439	0.323015	0.353501	0.00919406	11.1006	0.0332942	6.27682	5.00828	5.63569	7.37987
TCGA-TM-A7C3	1506	0	250.456	4.74854	16.3974	20.0822	11.6628	4.43426	1.57387	4.5705	0.0768168	0.115792	0.0266427	0.366078	0.00797538	8.32617	42.831	12.9491	2.20014	0.0330013	20.6864	20.4942	3.2399	2.56868	10.5596	6.78018	17.7144	4.23055	14.9039	0.251626	11.7547	1.54176	0.137314	10.6369	1.4929	32.1665	13.8842	8.97787	2.51725	18.7422	1.04933	0.044294	0.0806418	0.0582785	0.0886508	4.1753	6.32734	6.32965	8.07914
TCGA-CS-6667	232	0	422.05	4.88032	19.5431	32.137	15.605	4.56717	0.734767	9.54836	0.022562	0.0428269	0.0331424	1.01577	0.0718357	7.90841	41.7793	24.853	5.33448	0.0443103	16.071	9.61388	6.06868	1.88837	13.4587	6.12859	18.041	14.7458	11.4162	0.16373	8.52276	3.15717	0.0964231	15.3572	2.16978	27.1048	15.3508	6.8686	3.11039	62.3626	0.816	0.132988	0.0225576	0.360094	0.0612655	3.42362	9.19198	9.11987	8.00657
TCGA-CS-6666	260	0	1116.73	8.83781	19.4246	43.5461	25.0987	1.91836	0.739506	13.1762	0.00984808	1.01275	0.09162	0.592946	0.0899767	6.79363	68.1265	28.5819	4.23094	0.0338467	13.216	36.449	6.70222	2.72387	20.5663	6.22957	9.31732	6.90753	15.0511	0.0952882	7.30298	2.92714	0.0485626	9.73964	1.08366	37.375	16.2049	5.53998	3.83391	55.7493	0.491983	0.0681431	0.0236308	0.0531302	0.0213934	2.66738	7.53818	6.82221	6.71972
TCGA-DU-A5TR	910	0	332.041	2.68864	12.3572	17.9961	8.19134	4.3576	0.603277	23.0915	0.0213472	0.0786584	0.336227	0.831228	0.064274	14.1092	28.7398	15.6585	1.82035	0.18342	10.9043	16.6401	4.40327	1.95583	7.72568	3.91615	21.3018	42.0642	2.34343	0.275403	4.23288	6.64594	0.0631602	8.6229	16.9105	25.7246	48.3127	5.88309	2.41323	29.1694	1.30807	0.0492369	0.10885	0.07198	0.0927469	6.65273	5.41787	8.8838	8.32446
TCGA-VM-A8C9	917	0	667.577	1.69202	25.3661	12.9553	8.40099	7.54265	0.843146	27.2634	0	0.0683496	0	0.387842	0.0149539	22.038	36.5079	23.5817	0.825574	0.0294655	7.79991	9.72031	2.43757	0.290482	5.76238	2.37307	56.8713	64.1937	2.1784	0.174203	7.10686	35.2929	0.0177561	17.4922	6.46575	35.3597	31.8571	4.52614	2.62214	28.2167	0.159274	0.0369117	0	1.64313	0.0130369	4.88947	9.05436	3.23441	8.92782
TCGA-RY-A83Z	303	0	1279.77	4.94207	25.7275	23.0443	11.1017	3.57555	1.57182	7.96563	0.0115874	0.256178	0.0245863	1.05055	0.0938376	12.9886	57.7736	21.5523	2.25527	0.0455138	11.157	40.572	3.00241	0.891375	13.5512	3.61954	41.1205	25.3853	3.93008	0.467157	4.40626	6.12841	0.108565	16.565	2.67064	51.1921	16.0957	5.17764	2.9761	18.5104	0.280392	0.115813	0.0278043	2.7428	0.0943943	7.07734	4.28757	13.1339	10.915
TCGA-F6-A8O3	9	0	434.097	6.02668	15.3674	33.3248	11.1549	0.583389	0.758287	2.28799	0.012691	0.0999019	0.0134639	0.545796	0.0131762	10.3234	32.2714	29.1876	4.39214	0.052964	8.93529	27.2483	9.73377	1.94705	9.27906	9.32329	22.4485	5.23595	5.27697	0.557697	47.1334	0.727206	0.137679	26.2838	0.649611	38.0939	3.46431	8.02099	2.91335	72.0619	0.554755	0.424436	0	0.0984221	0.1344	3.25447	11.7964	8.29089	9.72819
TCGA-QH-A6X5	499	0	343.935	2.95587	15.5946	20.581	15.374	3.07371	0.489716	3.41885	0.0586944	0.163842	0.0127732	0.611732	0.0446883	10.6745	24.3264	22.0955	2.3497	0.225741	7.15564	13.4744	4.61791	1.50927	7.5296	5.10745	28.4228	241.075	3.06967	0.291846	28.4765	3.28531	0.101301	17.3963	1.41383	28.2081	7.70787	5.4525	2.38134	38.1149	0.572697	0.376048	0.0117366	0.877399	0.0531268	3.13907	7.0437	4.84163	10.9668
TCGA-CS-6186	540	1	199.297	4.38008	21.1173	28.9486	13.6687	7.42251	0.747867	5.52162	0.0231557	0.325775	0.0113381	0.298754	0.0192328	7.31121	39.6397	11.0558	3.38388	0.0227381	16.0298	26.8314	1.96064	4.0479	16.3724	6.15169	19.0768	10.5857	11.211	0.247388	0.738884	2.15701	0.0285462	8.79745	4.45584	39.8663	11.3344	7.25466	3.31892	24.9402	0.786257	0.0178027	0.00694534	0.234233	0.0188632	3.81281	9.69147	5.55001	8.36811
TCGA-DB-A64V	891	0	352.031	2.77668	10.6064	17.7176	16.4607	2.61999	0.653418	11.6912	0.0272782	0.152291	0.0222612	0.959651	0.0604185	13.3511	26.9934	22.2454	1.7934	0.522332	8.84213	10.4536	5.35458	1.27712	7.3368	4.21592	33.7698	112.464	1.95632	0.318926	27.0251	6.81509	0.0762243	19.5325	5.05749	37.0063	15.5256	6.40675	3.10262	54.5186	0.610395	0.160787	0.0218183	9.52282	0.00987625	3.77826	4.39177	6.74555	11.5852
TCGA-QH-A65R	463	0	764.753	4.85539	20.9838	34.8026	10.7596	1.02426	0.860871	1.83875	0.0528685	0.109209	0.025887	0.401481	0.016467	11.1819	36.089	38.4744	2.63269	0.0519151	10.2671	18.1986	10.3582	1.70599	9.11172	4.22595	23.777	5.84429	6.53375	0.426288	14.4626	1.59301	0.204218	28.9564	0.713928	39.4591	4.50384	7.1735	2.50349	54.0405	1.11424	0.968745	0.0105716	0.956691	0.186629	3.24203	9.93838	9.48128	7.45215
TCGA-F6-A8O4	8	0	323.704	4.65828	20.4805	22.5263	14.9246	2.98093	0.618968	3.95553	0.931928	0.0453152	0.0380265	0.38262	0.0156058	9.72361	40.5607	21.6385	3.45714	0.0479701	19.085	10.4963	8.03821	1.79289	12.1284	6.6036	28.384	14.6677	4.29444	0.733251	3.51681	1.22516	0.218657	35.3912	1.14792	29.6897	8.87623	7.0658	2.81986	42.5638	0.838909	0.161788	0.0270507	0.182458	0.17959	4.25311	9.04758	9.50296	8.1995
TCGA-CS-6188	727	0	210.634	5.29203	15.5437	22.4289	13.9499	2.63552	0.535636	10.8706	0.00839723	0.978872	0.00548226	0.218634	0.0139493	15.811	42.943	13.1379	4.45669	0.169039	18.6131	10.7082	8.21673	3.0266	17.4786	7.58024	14.6962	30.8468	45.2387	0.257292	5.9206	6.21146	0.045549	11.7144	4.84533	34.7548	24.0916	9.4563	3.91163	45.0895	0.648917	0.025824	0.0402988	0.458691	0.0501645	2.8453	6.92921	6.04477	9.92744
TCGA-HW-8319	264	0	229.423	6.2113	12.6379	23.4526	10.3416	2.03114	0.557999	14.394	0.0359936	0.106101	0.0281988	0.748043	0.0448438	7.97808	42.2706	16.4937	4.52037	0.523099	13.8307	10.6813	8.18285	2.02219	14.4685	9.58648	12.7652	19.586	8.79714	0.612371	12.3954	2.27203	0.425978	32.0376	2.80597	23.5017	9.66947	8.08061	3.32505	50.6114	0.775448	0.116226	0.518207	0.0825286	0.148562	2.7348	8.16029	10.9843	7.3487
TCGA-HT-7688	966	0	220.042	6.00561	22.8653	26.7765	10.8206	1.40738	0.420328	4.82475	0.0390429	0.106806	0.0350484	0.583904	0.0310774	8.92766	40.3287	25.7339	4.91914	0.520769	12.214	12.4673	12.7304	1.47359	13.6072	10.0994	22.7122	36.3396	8.15586	1.8154	16.1999	1.69086	1.28352	92.0704	1.11146	22.2402	4.43104	8.16483	3.52009	45.7394	0.706031	0.430246	0.0117106	0.715284	0.498285	3.23298	5.49796	11.3594	8.10172
TCGA-HW-7487	411	0	343.276	5.14619	15.0936	25.836	12.5659	1.89947	0.414666	3.45111	0.0142656	0.0907933	0.0291047	0.499102	0.0133299	9.4915	27.6473	26.5181	5.57162	0.280166	9.57564	8.31501	11.3093	1.57828	8.99314	8.37965	20.2922	48.576	5.63622	1.28541	25.6006	1.75289	0.657736	61.2109	1.28861	23.7434	5.3779	7.90711	3.2814	52.9223	0.718236	0.570322	0.025673	0.779245	0.445477	3.05502	7.48211	10.4089	9.08087
TCGA-QH-A870	397	0	243.44	4.39177	15.2398	22.0896	16.8232	5.29183	0.747078	9.08075	0.0397957	0.0333263	0.0487148	0.957503	0.045449	12.8938	34.6723	19.827	4.6909	0.0683866	21.326	5.3783	6.36865	2.47658	9.6898	7.71229	16.9845	36.4497	11.5527	0.088242	16.3864	3.28636	0.0981198	12.1106	2.17863	31.7241	11.784	4.89777	3.59717	39.6303	1.095	0.0841389	0.0179046	0.268371	0.0324187	4.2666	8.62645	9.11643	8.98599
TCGA-CS-5394	5	0	249.987	7.54286	18.5069	39.0247	12.1643	1.25155	0.627555	3.00242	0.0317233	0.162054	0.0168277	0.577067	0.052698	7.29179	27.5355	28.4081	8.68332	0.0116817	8.1627	19.2518	10.0072	1.75143	12.3763	10.3285	13.3646	2.87214	15.9915	0.406068	32.2666	0.486037	0.070395	19.4685	0.182354	32.5187	34.0393	8.88602	2.72449	78.6154	0.674781	0.115851	0.00475757	0.12836	0.0646067	2.59021	12.0319	5.9219	9.81597
TCGA-DU-A7T8	4231	1	872.954	4.37728	16.1981	31.8976	12.338	2.36379	0.448776	18.5924	0.147125	0.10678	0.0493604	1.8621	0.169722	9.693	54.4551	21.0181	2.74185	0.0802621	11.8572	9.00676	8.80707	2.53625	11.8548	4.97835	27.2233	18.38	3.66315	1.36753	13.0407	5.1444	0.0564277	11.2509	6.07212	38.0717	14.4628	5.70846	2.17111	38.2666	1.17395	0.087977	0.0882576	0.0881929	0.150925	4.74109	6.85735	13.0115	6.69423
TCGA-TM-A84J	737	0	349.785	6.35467	17.195	33.6619	5.1137	0.391316	0.662255	4.6159	0	1.44328	0.0135564	0.533393	0.0150909	12.8267	78.0904	20.9831	3.4129	0	13.892	9.81926	7.79942	2.72803	22.6254	11.4655	13.5162	2.40595	13.4509	2.8672	45.6442	5.09017	0.076795	13.1979	1.06855	23.6808	9.15018	8.15736	2.46496	31.8398	0.332272	0.0239464	0.00622813	0.056012	0.169153	2.74712	7.85445	11.1938	8.347
TCGA-HT-7603	707	0	278.364	4.14605	29.5693	19.0579	17.9971	2.08155	0.673113	4.08717	0.036887	0.0469534	0.00963289	0.265826	0.0122551	7.31502	40.1656	34.6801	2.77089	0.19922	16.7806	3.09636	17.4905	0.70461	13.4325	12.133	34.5495	48.636	8.20752	0.948789	15.6829	2.12044	0.498395	111.642	0.662359	21.3612	6.46432	10.5182	3.60541	43.2697	0.17276	0.334643	0.0265534	0.601988	0.432708	3.43664	6.27909	10.9282	8.89432
TCGA-HW-7491	1224	0	230.557	7.6172	6.3283	33.0303	11.5682	0.265961	0.516271	3.63342	0.102031	0.373678	0.0377473	0.57242	0.00988705	9.86785	38.6678	24.4043	8.44964	0.110211	6.71498	13.2123	15.2258	3.28948	12.7066	10.6885	15.2983	26.484	7.13779	0.205675	35.6463	0.608621	0.0536678	18.9439	0.804347	28.8175	8.73821	8.40491	2.93271	84.1361	0.552197	0.125511	0.00816092	0.944953	0.0480235	2.22897	11.2994	6.00471	8.63714
TCGA-HW-7486	611	0	251.782	3.73199	11.0739	22.2106	17.3758	1.47823	0.303621	9.24971	0.0526445	0.125961	0.0270048	0.816461	0.0374793	9.63911	28.8193	19.3934	3.10211	0.10339	9.15142	14.0345	6.58814	2.24263	10.4107	5.83202	21.0975	323.311	5.87455	0.230433	42.6382	2.26762	0.0556284	24.6386	2.70088	31.6412	10.6638	5.92065	3.03562	58.4581	0.299394	0.144552	0.00902301	0.11665	0.0449279	2.89187	7.36046	4.74764	11.9168
TCGA-P5-A5EU	2	0	296.556	6.25382	21.5467	18.1397	9.26138	3.3566	0.741236	22.1365	0	0.99326	0.00449505	0.262493	0.024781	16.4664	66.4385	26.3251	4.65708	0.0090146	21.5944	27.1186	7.87823	1.96385	26.8737	5.18065	13.6398	4.25694	24.1483	1.78761	9.2653	4.84962	0.0226345	18.0498	7.89537	43.5725	67.2045	5.35393	1.97794	45.4469	0.5876	0.0141159	0.011014	0.0495267	0.049856	3.46008	6.18576	9.04276	10.6659
TCGA-DB-A4XF	1023	0	237.898	5.41529	15.9593	25.487	13.1689	1.27677	0.723342	13.6486	0.0102972	0.0758842	0.0134453	0.598441	0.0342108	11.1852	31.7813	23.7193	7.73508	0.182007	15.3631	11.9238	11.0067	1.65989	13.1719	6.32072	16.1954	13.2225	5.11874	0.35702	8.5283	5.59748	0.17772	23.7332	3.21885	22.7152	7.41403	7.41497	3.21365	57.3121	0.972571	0.0316669	0.067948	1.91658	0.156583	2.86462	7.30303	8.77223	6.33454
TCGA-VM-A8CB	5	0	576.119	4.37093	12.9837	19.304	13.4251	0.69862	1.29683	1.31448	0	0.150804	0.0158875	1.55005	0.0530574	14.8446	27.2753	44.0145	3.46646	0.0477923	8.82849	22.5798	7.88953	1.67218	6.86351	6.32549	29.0674	10.1328	5.73346	1.7169	10.6331	0.79042	0.132	26.0555	0.845964	51.555	12.4488	9.15148	2.21372	53.6391	1.35817	0.233867	0.0145981	0.402066	0.171808	6.59119	11.0697	15.6398	11.3557
TCGA-HT-7856	1191	0	182.527	4.04061	13.144	21.4339	10.4504	2.02544	0.367688	2.88999	0.0543735	0.0865151	0.0587945	0.775787	0.0352828	13.325	24.7161	18.0469	3.54971	0.333706	9.64249	5.03178	10.2615	1.28361	7.82693	7.91257	25.9311	53.2646	6.29976	1.94002	17.2838	1.57449	1.02893	64.2068	1.45486	25.5214	5.85739	6.48475	3.35933	35.6073	0.525231	0.480743	0.0326177	1.08629	0.53153	3.29921	7.34816	17.6094	7.02459
TCGA-HW-A5KL	635	0	301.442	4.78125	10.8335	23.6275	11.1001	3.11369	0.458354	16.9436	0.0270318	0.0664029	0.0264722	0.94051	0.0673568	6.90048	43.8031	18.1914	2.91118	0.106177	15.329	14.0755	7.29102	1.65889	13.8628	5.48814	16.8018	34.9625	2.97912	0.178002	19.7739	5.02511	0.0266597	7.59061	2.86107	23.7664	10.8715	5.52036	2.17679	45.0541	0.654116	0.0623482	0.0216212	0.528655	0.0489352	2.95757	6.72178	8.23002	5.69663
TCGA-S9-A6WH	989	0	604.5	5.21314	14.0089	29.579	10.8184	0.667527	0.706206	4.40251	0	0.105798	0.0178442	0.672097	0.0554932	11.4497	36.0624	36.3088	4.67854	0.178929	7.79259	17.8289	9.2107	2.93466	7.21472	4.82385	33.0472	18.5006	3.47849	1.36149	14.7099	1.82393	0.28753	16.9054	1.52956	46.4583	7.39523	7.18499	2.68752	47.7136	1.02408	3.10068	0.0582972	1.18785	0.145138	3.78904	6.47471	10.6062	7.50943
TCGA-WY-A85B	1395	0	407.126	5.49613	15.9452	28.0293	10.5387	2.76715	0.712865	26.0589	0.0100327	0.0604924	0.022925	1.14049	0.0666643	9.75455	57.8409	22.6608	3.26534	0.19211	20.9135	26.2747	8.79829	3.22152	19.202	6.42772	22.1885	21.898	4.40802	0.287179	7.51147	7.49501	0.0643149	11.4689	4.18523	30.6185	23.5534	6.65962	3.56019	56.709	1.05723	0.208262	0.0120369	1.85382	0.0435889	4.02969	11.6033	7.52635	8.65935
TCGA-TM-A84R	568	0	192.583	4.30954	21.9843	26.3701	11.9793	2.17804	0.36021	2.2038	0.0267671	0.0627638	0.0830076	0.362978	0.0314959	12.6048	26.7579	25.4827	3.42667	0.551972	10.0125	4.53635	13.3742	1.02954	7.22389	8.93506	27.8402	40.4784	9.3234	1.82374	22.3691	0.710843	1.38153	117.367	1.1723	23.0638	6.02264	9.02907	4.4739	34.4557	0.36216	0.391005	0.058876	0.192544	0.596009	3.77782	5.42122	14.2369	6.86024
TCGA-DU-A76L	816	1	270.431	6.10556	19.3941	18.8788	9.99138	1.45488	0.437841	15.9139	0	1.7347	0.014751	0.533649	0.0243965	14.3401	47.9046	17.3256	4.9986	0.128684	14.3485	15.8246	9.13688	2.67158	22.9682	7.05648	26.4781	72.0252	11.9992	4.13188	5.81015	10.518	0.0445666	14.359	5.22974	25.9087	114.644	9.22984	3.40978	33.2498	0.705467	0.0555874	0.0108431	1.6334	0.0539907	3.32038	6.92521	6.72657	11.3369
TCGA-CS-4942	1337	1	360.09	4.9918	15.321	24.2968	13.0497	3.47133	0.343338	38.774	0.0671402	0.0674706	0.0109584	0.343375	0.0108434	7.9432	49.5829	17.4642	4.18428	0.128196	16.7503	16.8976	7.21181	2.03111	18.1986	6.85105	18.1256	30.9452	5.64177	0.183462	13.4507	12.0468	0.0956454	15.491	4.67619	32.4393	30.0803	6.96735	4.16145	70.6807	0.308627	0.0860318	0.0402762	0.246511	0.0405143	2.52774	7.162	6.82578	8.04419
TCGA-S9-A6TY	955	0	617.319	4.95015	17.8808	32.5908	15.9083	1.07253	0.355189	1.99109	0.45715	0.0288931	0.0549049	0.820105	0.0286569	9.18888	29.5909	27.5818	2.82043	0.177869	10.3304	17.9041	10.686	2.38571	8.9036	6.23048	24.7193	36.45	3.24483	1.29361	27.8699	0.787626	0.267962	31.5861	0.571367	25.0453	4.56991	6.54536	2.29113	49.5536	0.754083	1.40587	0.0776141	0.221038	0.313852	3.47151	7.49756	8.55195	7.79927
TCGA-QH-A86X	339	0	288.054	4.92631	13.504	26.3581	9.92989	2.31633	0.471846	2.94785	0.018454	0.142177	0.0712839	0.860854	0.0421511	8.67317	23.5001	23.327	4.61813	0.175172	6.76829	15.3534	6.64766	2.36865	7.23904	7.29544	21.1383	48.5459	2.93362	0.607592	35.7892	1.05932	0.151667	17.2144	0.585957	27.5635	6.163	7.05108	2.66493	47.5835	1.06116	0.293217	0.0258306	1.08271	0.0868582	3.30043	8.22494	8.89079	8.14381
TCGA-DU-7290	317	1	258.23	5.88543	11.3979	19.1784	18.3522	3.32575	0.778148	50.7801	0	0.238837	0.0473168	1.17483	0.0325391	9.63678	35.6779	11.7435	3.47497	0.0577043	29.5176	10.1054	11.2932	2.61748	22.487	5.82835	17.4148	42.6391	14.0013	0.388536	4.85016	22.9428	0.0425004	15.8147	9.74981	19.5006	29.2115	8.28913	3.60455	39.2201	0.330264	0.0662629	0.94004	5.97603	0.0212759	3.18328	6.32991	5.02402	9.28132
TCGA-QH-A6XC	510	0	333.851	2.63803	18.5968	18.6789	10.0509	3.37234	0.55845	7.50805	0.00910046	0.073162	0.0118828	0.378687	0.00755873	13.6631	49.6344	14.1526	1.48886	0.254686	11.8972	14.825	4.10191	1.39619	8.97204	4.61397	40.5241	49.2079	11.6937	0.884213	5.10086	9.89949	0.502611	56.4241	2.61061	34.345	9.21817	6.09253	3.05056	18.9431	0.383597	0.2099	0.0382145	0.761001	0.168039	4.18981	5.11621	8.14845	9.31742
TCGA-TM-A84T	726	0	776.979	5.8037	13.2682	31.0172	13.6666	2.46289	0.677456	21.8834	0	0.0936837	0.0236691	0.741658	0.0236596	7.50489	55.8958	23.1195	3.19826	0.0356004	12.8158	19.4374	6.95714	1.88463	15.8269	6.38143	20.3074	31.588	2.8803	0.167042	10.6719	5.67515	0.0561866	9.33676	2.94876	30.1613	15.5581	6.12666	2.47604	46.4051	1.20474	0.00796374	0.0124276	0.0139707	0.0731308	3.61965	6.50089	9.16629	7.50053
TCGA-HW-8321	598	0	285.618	5.94965	16.8461	32.8071	12.8471	1.90876	0.435206	8.08245	0.02156	0.0649983	0.0328435	0.937246	0.0805836	10.3189	52.125	24.8652	5.98639	0.162312	14.7935	8.22495	10.4156	2.49711	17.2348	7.98472	18.2213	34.6807	14.0388	0.321608	23.8583	4.39991	0.145299	15.2745	2.77372	26.6073	19.0014	6.85682	2.91908	59.0532	1.0883	0.0663034	0.0258669	0.605811	0.148313	2.70872	8.22819	8.67046	7.33878
TCGA-R8-A6MK	2704	0	240.077	3.58751	15.5621	22.5816	15.4029	3.78331	0.826525	4.58052	0.086616	0.123969	0.0231335	0.556471	0.0114453	7.90732	20.4323	24.2238	3.43929	0.0695897	8.96208	14.2326	5.12576	2.01457	6.74751	7.89201	16.4347	54.5131	4.66247	0.311106	28.6518	3.1415	0.166965	19.1105	1.4829	28.024	10.7974	7.50873	2.38283	46.6368	0.577765	0.230047	0.0236179	0.80183	0.0684216	3.31689	7.15738	5.17583	10.1274
TCGA-HT-7902	958	0	214.502	3.24674	12.1394	16.7301	19.4534	2.36446	0.32061	6.88177	0.00630275	0.0696715	0.0277752	1.70548	0.11517	10.5765	34.2454	14.4773	2.7201	0.160916	10.7239	11.7258	6.27962	1.77595	12.9078	4.74129	19.6455	271.879	6.01818	0.25156	17.972	2.08967	0.127428	27.243	2.36357	28.6663	8.87804	4.9586	3.0948	41.7564	0.624816	0.0387657	0.04159	0.0297528	0.0342293	3.14685	6.27412	5.78551	11.8003
TCGA-DU-A7TG	1353	1	185.087	3.91496	20.2924	23.7148	9.74928	2.06651	0.595712	7.28485	0.0594988	0.0518194	0.0504981	0.417713	0.0172966	11.9629	25.8641	24.4712	2.90734	0.368083	10.3605	5.17348	12.0531	1.26511	7.11119	8.27947	24.5221	22.3531	10.6754	2.26442	17.7604	3.34735	1.62543	99.1019	4.24749	20.9913	8.0122	8.32311	3.57351	31.5134	0.176486	0.475739	0.0214154	0.778412	0.659183	3.68583	5.7733	16.7425	6.31838
TCGA-TQ-A7RJ	1231	0	322.591	4.95672	13.6159	23.8357	14.7152	4.10808	0.420095	18.1705	0.0320175	0.0965251	0.0418062	1.2802	0.11967	10.3032	36.3821	21.1727	4.14919	0.0943203	14.4733	3.6585	5.86532	1.86107	12.8768	6.40635	18.9192	24.0241	4.2028	0.306568	15.4979	6.50461	0.102624	14.8008	3.87809	30.3909	16.7799	6.26011	3.46957	46.0896	1.03093	0.129233	0.0336118	3.08761	0.186923	3.55022	7.63484	10.0179	7.63887
TCGA-FN-7833	839	0	248.762	5.365	16.1666	20.9884	10.1407	4.55971	0.56752	52.7813	0	0.0308318	0.0109257	0.815028	0.0486495	7.90977	47.9583	19.0265	4.73866	0.180765	14.9426	7.97452	9.21041	2.65065	14.1484	6.00668	17.2799	20.4658	6.5512	0.49252	8.82044	9.03549	0.0288831	10.1785	10.9985	29.3754	27.388	6.34094	3.24783	50.966	1.03851	0.10293	0.00501951	0.0225712	0.0454426	3.73402	5.30119	6.91047	8.70956
TCGA-RY-A83Y	168	0	455.072	3.23095	3.1296	25.2515	11.1328	2.26488	1.38053	3.90792	0.0240814	0.246032	0.0510962	0.54582	0.0375032	11.4351	26.5849	29.6315	2.56818	0.135971	6.59011	15.3982	5.0899	1.19163	6.45488	4.71404	37.9151	86.5271	3.40734	0.388345	20.3203	1.82263	0.160312	23.8771	0.659172	41.8393	15.5292	7.25858	2.79747	44.8162	1.485	1.26824	0.057784	2.26546	0.0653912	4.87551	9.15467	9.47547	8.70668
TCGA-KT-A74X	440	0	278	3.84158	19.7084	29.1667	12.5626	1.13104	0.555178	3.24929	0.0129733	0.438916	0.00741108	0.661984	0.0228978	10.478	36.5039	24.9218	3.11614	0.095545	6.66512	19.1922	7.68726	2.43048	8.66971	8.0813	33.0357	52.2839	7.92694	0.549181	27.363	4.33706	0.0447815	17.2948	1.10795	35.1658	10.0678	7.00988	2.52678	49.4823	0.926593	0.3092	0.0194561	1.68852	0.0422736	3.82783	8.52951	6.54451	11.8997
TCGA-TM-A84M	756	0	296.653	6.43429	1.26399	35.3598	7.87949	0.815867	0.487515	1.36178	0.138573	0.102784	0.0258485	1.37369	0.117153	10.4029	27.9396	24.7304	5.05351	0.0145794	8.65668	31.7197	10.8984	2.45109	8.54542	7.09991	15.0444	6.63583	8.44917	0.905844	50.1433	0.697589	0.0683329	15.5091	0.400987	34.2114	10.1522	7.65935	2.32026	52.3111	1.60706	0.585962	0.0534392	0.09345	0.198894	3.47228	7.46944	9.8084	7.31611
TCGA-CS-6669	227	0	118.861	3.85433	20.9918	23.2923	9.87619	2.03824	0.35341	1.74996	0.00875391	0.0234586	0.0671527	0.293041	0.0145418	10.9065	26.3552	19.4689	2.49394	0.318054	7.0189	1.84841	14.8215	0.756634	7.77457	9.83372	34.8929	38.4495	11.1056	1.95166	12.9028	1.13197	1.01011	124.915	0.900963	15.4563	2.98792	6.01426	3.67304	26.8812	0.232327	0.531688	0.0315079	0.29517	0.4041	3.74935	4.09799	12.784	4.50763
TCGA-TQ-A7RQ	797	0	521.875	5.80379	11.6799	26.9592	11.7756	0.860604	0.566179	1.56754	0.118098	0.116207	0.0397558	1.51684	0.0888949	8.25338	21.775	27.4575	10.7465	0.206569	5.77665	10.2626	9.78817	1.57581	8.40172	7.36069	19.6167	18.7871	4.80815	1.96401	30.9422	1.348	0.291181	20.5005	0.751594	28.0246	3.7665	6.03196	4.08673	45.0062	1.0947	0.646928	0.602183	0.238926	0.200429	3.04898	8.42292	12.0927	6.15618
TCGA-EZ-7264	438	0	284.455	8.78265	7.25754	32.1264	10.6629	1.06923	0.50523	3.44508	0.00665663	0.10703	0.0195565	0.671596	0.017969	9.27568	32.1765	26.9838	6.24107	0.872635	7.80218	21.9192	9.73218	5.87153	10.724	7.2134	12.1045	32.9291	4.59989	0.627981	31.9279	0.889328	0.0919101	21.6342	0.306112	31.2444	3.73026	7.30018	3.60096	72.8762	1.43411	0.358245	0.0039932	0.448905	0.0831477	2.40939	6.66238	7.75228	7.7362
TCGA-S9-A7R2	318	1	313.604	3.18467	15.2369	12.897	17.4801	4.35138	0.71801	20.0821	0.0214277	0.348119	0.0157381	1.01618	0.0355951	12.729	32.3813	13.9763	1.95274	0.142029	15.6213	7.10913	5.24177	1.53259	10.4004	4.06574	22.6211	131.815	3.57	0.272121	12.6722	14.0117	0.0792478	19.0708	9.38452	22.9771	19.085	5.45697	3.05143	42.6397	0.493418	0.172979	0.0964057	12.6223	0.0872779	4.07311	6.29544	5.76273	8.86062
TCGA-TQ-A7RO	951	0	204.153	4.88194	9.20961	29.8313	12.4367	1.50872	0.372042	3.23926	0	0.16487	0.0290566	0.345688	0.00869797	8.74039	24.4769	22.042	6.40769	0.205665	7.06791	15.0492	7.83023	2.26285	10.2089	9.84857	13.9907	13.5295	6.63725	0.565736	22.5391	2.00234	0.185903	21.3575	1.34725	27.0526	7.43326	7.18389	3.43286	58.7312	0.956393	0.458918	0.0565381	1.67371	0.0625595	2.91043	9.37725	9.76445	8.65017
TCGA-TM-A84I	856	0	558.964	6.65792	7.5957	18.2894	7.47817	0.784518	0.80333	10.7248	0.0273831	0.180395	0.0417141	0.708713	0.0568601	11.6586	68.673	16.1663	4.65226	0.049297	40.9244	30.6668	6.45601	5.03739	25.4968	14.7206	10.8575	5.8125	9.54978	0.305432	5.52369	4.08352	0.0360082	10.3882	3.48789	31.9153	14.0972	8.98696	2.55747	38.3376	1.58173	0.0280704	0.0328532	0.0492437	0.0644424	1.69782	8.16355	5.90178	6.85342
TCGA-QH-A6X4	444	0	339.234	4.13667	6.40254	20.6825	10.119	0.89425	0.634958	3.11362	0.059834	0.146026	0.0153464	1.24987	0.0514723	9.70842	21.615	18.8004	3.61849	0.260201	5.83636	13.5032	5.37374	1.71405	6.37917	4.96001	32.7059	82.8154	3.12042	1.37844	20.7135	2.62445	0.0632255	17.6921	1.32429	33.4563	3.9336	4.83055	2.53329	37.1255	1.08757	0.506021	0.00512763	1.95411	0.0649899	4.24216	8.55279	10.714	9.19136
TCGA-DU-7301	790	1	440.258	5.79488	14.1096	28.1499	15.1518	0.91956	0.406328	23.8503	0.762713	0.158034	0.0346511	1.00535	0.166539	10.9004	63.2832	22.6901	5.67455	0.451692	21.2743	17.1088	10.5674	3.41175	18.8172	8.19526	16.1689	41.7613	13.0168	0.0507208	9.3516	4.48632	0.0116322	8.92237	2.09205	28.1465	26.7048	7.92457	3.70096	70.3225	0.386677	0.114861	0.0471689	0.530261	0.029892	2.39914	8.75179	5.53782	8.22389
TCGA-FG-7643	295	0	178.185	3.7298	19.5048	25.6779	14.8229	4.20254	0.403929	4.10479	0.030319	0.12949	0.0235056	0.475753	0.034626	10.0529	37.5413	18.4015	3.94717	0.320051	13.8397	3.84193	9.03818	1.18254	10.8508	8.15225	24.1601	152.444	15.0343	1.0451	18.3678	3.03796	0.545705	82.906	1.73866	23.7044	4.33122	6.6093	2.97711	38.7724	0.289913	0.314685	0.0181878	1.17055	0.37048	2.65075	6.25259	8.21496	8.06184
TCGA-DB-A75P	494	0	269.47	2.31691	17.8092	16.4552	11.9257	5.64559	0.294765	7.48572	0	0.0208782	0.0174393	0.378791	0.03328	20.1722	34.4329	17.1014	2.35703	0.0830625	11.4434	8.33801	5.22642	1.15441	7.81386	4.24046	35.6578	25.6967	4.61522	1.0123	12.3289	4.16897	0.298569	39.2517	2.18378	23.0936	8.02122	3.69802	2.44539	28.0463	0.47957	0.335435	0.016024	0.0120092	0.227274	3.80395	4.32709	10.1449	6.41471
TCGA-DU-7299	1341	1	266.147	3.32532	16.061	26.4344	14.213	2.62548	0.585027	18.43	0	0.116077	0.00411335	0.628336	0.0222406	8.83485	52.399	22.5909	6.34048	0.337182	13.0777	16.7945	8.03017	4.62614	15.1385	15.2335	22.7818	90.3305	4.58702	0.365772	20.8482	5.3439	0.0372823	14.0597	2.89733	26.3639	14.465	6.32698	3.937	59.6406	0.727866	0.13563	0.0491339	0.212443	0.0513252	2.43124	8.95052	5.17293	9.78546
TCGA-DU-7006	351	1	181.206	7.1434	25.1697	25.6337	9.89998	5.15687	0.516381	52.3441	0	0.516939	0.024961	1.5255	0.0692855	17.5551	41.1153	12.7688	3.90506	0.0648479	17.1039	23.9538	9.39317	3.13338	18.416	5.74054	10.405	24.3939	9.52983	0.294267	9.94987	8.89522	0.0411346	12.7074	8.46364	25.2571	28.0651	5.18168	4.21683	38.346	0.493781	0.0481	1.05085	0.41722	0.0113257	3.50476	5.29653	6.02834	8.80123
TCGA-HT-A4DS	9	0	521.544	1.87331	26.9314	15.3344	4.69813	9.26322	1.15412	16.1003	0	0.236825	0.00501711	0.250104	0.0255314	15.7134	71.3717	17.7849	2.26438	0.0377308	9.5684	14.3925	2.05479	0.458313	9.73491	3.28802	80.2557	13.4442	8.33259	0.811722	3.48473	15.6828	0.0151579	18.2429	5.82254	42.0658	14.2372	4.45401	4.48756	17.5427	0.227946	0.153614	0.0276597	3.94898	0.125204	9.84292	4.73987	7.98226	11.5451
TCGA-DU-6405	607	1	220.052	5.26571	14.8054	20.8769	11.3832	3.65993	0.55769	18.1315	0.00742682	0.154243	0.00848525	0.371197	0.00925294	10.2998	43.702	8.13265	2.9925	0.0145858	17.4591	22.8216	4.4752	3.062	16.5325	7.85278	19.6809	10.9691	26.7123	0.7216	6.52203	2.63076	0.098882	7.92063	4.19594	26.9077	14.8566	3.95156	3.85106	25.9737	0.486968	0.0171298	0.0133657	0.0701182	0.0322672	2.76692	9.70757	7.16617	7.25644
TCGA-S9-A7J0	611	0	368.815	7.10912	17.6034	39.7067	7.6716	0.6524	0.433944	8.74535	0.0496095	0.332358	0.0175437	1.49348	0.0944282	14.3938	77.6505	22.1932	2.73771	0.056834	15.9222	47.6658	6.68771	5.97096	23.0544	19.1844	19.3243	16.0657	5.30253	1.14336	23.2748	4.36282	0.093776	14.7524	2.51672	30.0011	8.01716	7.96992	2.37783	38.1923	1.79422	0.00635684	0.0198399	0.986931	0.12124	4.9961	5.70986	13.6393	9.59813
TCGA-HT-7479	218	0	400.102	3.54097	13.2047	17.4725	24.1926	4.21465	0.384451	29.364	0.0691169	0.102899	0.0188017	0.580215	0.0478397	8.13901	38.1049	18.5664	3.42765	0.180988	18.5539	9.41868	5.94273	1.55325	12.4813	5.62889	17.179	150.936	6.67081	0.117653	32.6884	3.83575	0.0265088	16.0441	5.25111	26.0391	16.6078	6.27592	2.95422	53.9657	0.467579	0.236173	0.041462	0.0776843	0.029195	2.45179	6.97225	3.93902	9.84126
TCGA-DB-5278	1528	0	231.596	4.29165	15.2784	25.1838	11.1455	1.97335	0.517451	7.77241	0.0144013	0.151958	0.0235053	0.35822	0.00747597	9.47478	31.3756	22.0374	3.39666	0.30758	7.12083	16.0972	8.71452	2.47396	9.98096	8.2117	20.7232	79.4603	4.24874	0.537057	60.2949	2.04317	0.234351	35.4188	1.37577	30.5569	6.41951	7.29422	3.2527	56.854	0.578932	0.116257	0.0086391	0.937194	0.121228	2.90394	8.23449	7.40405	9.43917
TCGA-FG-7634	469	0	324.46	5.4601	13.6031	37.9579	11.7266	1.4812	0.382559	19.8473	0.103643	2.23681	0.012083	0.533503	0.0261328	11.188	40.866	19.4752	7.02764	0.163565	9.53076	28.8553	10.6067	3.53531	16.0209	9.17333	17.1637	56.0664	5.90345	0.152215	46.444	4.56415	0.0730116	12.7348	4.7175	24.1809	35.5455	8.14555	3.26027	65.5826	0.722337	0.113833	0.0266458	0.424356	0.124635	2.31517	8.55199	6.40011	8.20047
TCGA-S9-A7J3	520	0	231	4.85677	12.3331	23.8458	11.2405	1.70868	0.480726	4.53972	0.0626711	0.104966	0.0347784	0.725538	0.0273283	11.8796	25.3619	22.0775	5.49239	0.169238	7.98203	11.4319	8.65597	2.1803	8.77612	7.23646	22.1367	85.9393	5.12417	1.01571	33.6592	3.23393	0.105074	17.6704	1.7292	29.0724	9.15243	6.6399	2.62237	49.2383	1.07134	0.727565	0.0225572	4.83496	0.0816858	2.61266	8.06975	8.37519	8.40179
TCGA-TQ-A7RS	1	0	348.828	4.13189	11.4889	22.3243	11.2983	2.0689	0.770369	1.65687	0.00875317	0.190585	0.0228586	0.872943	0.0308987	9.30082	23.6893	26.3652	3.95617	0.159013	5.75712	16.3981	6.51432	1.62663	8.14754	5.99715	26.541	64.2858	5.33704	0.659908	31.4468	1.51811	0.0733778	11.1786	0.656497	38.6564	4.94228	6.09967	2.45456	42.5399	1.28452	0.174971	0.0525087	1.97157	0.0522909	4.40363	7.83332	8.94873	8.99694
TCGA-S9-A7QZ	398	0	364.239	3.82817	8.46481	27.0909	8.08525	1.29349	0.441893	1.58121	0.0264813	0.150799	0.0374589	0.814652	0.0659852	9.80219	26.5026	24.9429	5.42798	0.511408	6.81497	15.117	8.39572	1.9074	8.21231	5.98116	23.1194	29.3134	5.21757	1.58007	18.5217	1.06029	0.269874	24.0853	0.85534	31.6311	2.40583	5.97792	2.33449	47.0399	0.964638	1.07227	0.0370666	0.494079	0.191755	3.13018	8.02832	11.1708	7.32088
TCGA-RY-A83X	941	0	323.745	2.56429	14.0298	26.919	11.187	1.60446	0.688386	4.12924	0.0473645	0.156014	0.0167498	0.625776	0.0442579	9.30936	28.5818	24.4048	5.1557	0.468979	7.62411	19.8179	6.14383	2.08788	9.01819	6.91191	22.4059	77.2974	5.3671	0.630148	37.9646	1.88192	0.128459	9.61596	0.808146	35.0425	5.89157	7.60925	3.33052	44.0081	0.683978	1.52943	0.0189421	3.98734	0.0385844	3.91132	8.1548	8.14672	9.24027
TCGA-FG-A4MU	328	0	320.717	4.71918	8.85924	22.416	10.5633	2.85395	0.608007	16.5507	0	2.72354	0.0202247	0.549528	0.031668	13.7176	46.1596	12.5858	4.16124	0.0187198	14.3665	19.7903	4.37218	3.60443	17.9852	6.78385	19.4219	2.67018	10.2786	0.699395	1.06697	8.96672	0.0752047	8.01361	7.96299	39.7714	236.011	8.2622	3.11581	26.6024	0.818437	0.0146566	0.0114359	0.385679	0.0569423	3.3386	3.98296	8.16625	8.02954
TCGA-HT-7691	5	0	264.44	3.09075	21.2818	16.2712	14.2811	6.96186	0.721399	15.6378	0	0.18343	0.0376323	0.242872	0.0179537	12.7137	54.0355	22.2283	3.68647	0.0247635	16.4191	4.66511	4.27745	1.15525	11.5945	6.01861	17.4826	6.87811	3.65261	0.0813357	17.8819	11.3615	0.0284241	17.0013	4.95826	29.1288	32.9009	6.70331	2.69509	64.0283	0.404946	0.0332373	0.00864456	3.90178	0.0117391	2.66281	8.45781	3.77689	10.283
TCGA-TM-A84O	1013	1	267.188	3.33453	16.8265	23.7266	9.72718	6.12648	0.565003	6.57824	0.131837	0.152868	0.0248284	2.97285	0.345354	10.6586	21.6861	24.5177	2.69117	0.0796676	9.61746	13.7794	9.76516	1.85391	6.91217	6.73837	23.5569	14.2627	7.49364	0.306642	32.0151	5.41332	0.130023	21.4433	2.38177	32.8992	10.8322	6.39645	2.49919	49.6722	0.847025	1.13055	1.16197	0.335112	0.0771064	3.60449	5.54513	6.47824	8.0347
TCGA-S9-A7R8	963	1	430.365	6.27228	12.6587	31.5595	10.7817	2.04042	0.807354	18.2053	0.0229862	0.127046	0.0712828	1.87025	0.152737	9.8014	52.1444	24.0003	6.19704	0.270861	16.0934	17.7567	8.84613	1.83281	13.2089	5.36424	16.5194	56.2487	4.4605	0.537492	18.965	5.99402	0.124684	11.1632	3.29698	27.4564	11.7589	3.42565	2.61179	42.381	1.48924	0.150215	0.0758397	12.1763	0.156044	3.73803	7.68526	17.1081	7.12018
TCGA-FG-A87Q	176	0	290.642	3.62003	21.5921	21.3824	16.5086	4.83922	0.608182	20.9324	0.168633	0.176995	0.0128444	0.64291	0.0490227	13.8458	35.0231	14.219	3.18334	0.0441579	18.4455	11.5541	5.5647	1.42841	9.84518	3.91099	26.6217	96.7367	18.4945	0.33993	12.7493	11.9055	0.0942435	23.4585	9.89657	35.2559	26.0207	6.27779	3.45402	30.4531	0.763465	0.0259299	0.148368	5.07198	0.0366329	3.88572	6.84596	7.60392	9.54177
TCGA-DH-A66G	525	0	159.108	5.7446	12.7095	23.5652	11.2843	3.48594	0.323502	14.2383	0.0400655	0.0570387	0.0882811	0.596093	0.110233	9.84345	33.9764	17.8199	4.92265	0.118029	12.277	12.7522	12.2179	2.82236	12.7345	8.52646	13.5363	16.7806	9.03509	0.827829	13.2278	3.12449	0.340808	40.5778	4.81999	21.0734	14.7639	7.3473	3.97352	43.2335	0.813133	0.130914	0.0480691	0.263436	0.195831	3.11337	6.07782	10.4875	7.3299
TCGA-FG-A60L	501	0	794.093	2.18167	14.0312	15.5668	10.0757	6.20203	0.53614	13.9533	0.0535488	0.111212	0.0227241	0.906243	0.044477	13.927	58.7139	24.0199	1.36872	0.0368082	11.4152	4.23941	2.775	0.388788	9.57551	2.88416	58.7547	111.098	3.11666	0.120897	14.113	15.6013	0.0158435	13.8849	3.13089	35.6503	15.8223	6.02472	3.33004	27.5954	0.50159	0	0.0385476	5.93679	0.0407142	7.56355	5.30306	6.95059	11.0796
TCGA-HT-7857	9	0	301.536	5.53341	18.904	23.5819	9.5923	2.60569	0.444782	96.0854	0.00786941	0.405951	0.0295416	0.204891	0.00653624	19.479	37.1719	18.8433	2.96082	0.21637	13.3876	17.3309	11.851	1.90792	14.6715	5.05495	13.2091	33.5646	8.15183	0.333126	29.3147	11.0055	0.0698498	18.9067	17.9692	25.4392	51.9364	7.76028	4.50444	66.1999	0.921407	0.0242008	0.0377658	0.22289	0.00427376	3.57168	4.38584	5.89927	9.55851
TCGA-S9-A7R1	5168	1	499.932	4.84797	10.3903	24.4355	10.2597	2.21624	0.600293	1.35246	0.221927	0.026019	0.0253556	0.397251	0.0230413	7.97854	29.2364	31.2671	5.25118	0.0490332	5.28751	8.49129	10.2256	1.72159	8.73451	6.79888	27.7185	22.3784	6.44686	0.375783	17.0252	1.28527	0.186042	31.9224	0.686446	39.6544	6.91541	6.92432	2.65503	43.1012	0.649622	0.238873	0.013313	0.456469	0.277209	2.5438	8.00481	9.86706	6.6445
TCGA-HT-7616	9	1	282.441	7.43908	15.4619	25.309	13.7069	1.9612	0.734362	15.5872	0.0245811	0.135861	0.0180542	1.92287	7.22243	22.1674	36.986	28.9059	11.7366	0.675859	7.6395	16.5849	13.783	1.9228	10.3176	8.12861	16.6774	18.1527	8.47396	0.644156	41.4688	4.59465	0.0606069	21.194	2.96054	31.2966	85.07	9.72021	2.85268	74.1044	1.10328	0.311827	0.00737289	5.07251	0.0400489	2.57691	7.85641	7.77858	11.5527
TCGA-HT-7474	116	0	207.973	3.71969	17.4151	22.1811	13.768	2.40326	0.377313	4.45756	0.064703	0.0891034	0.0187744	0.661821	0.0373205	9.24204	36.1664	19.1048	3.25399	0.137662	13.4165	8.36961	8.67779	1.43542	10.8527	7.92725	22.7807	73.0592	14.2523	0.907199	17.7821	1.74914	0.478593	68.1996	1.60186	25.0281	7.40429	6.89269	3.7345	42.7851	0.308647	0.303999	0.0517523	0.203625	0.339679	3.13393	7.83667	7.32476	8.396
TCGA-WY-A859	1215	0	223.482	3.25152	24.039	19.958	9.43231	1.38676	0.64434	2.8737	0.0076001	0.0814666	0.0235687	0.851588	0.0441878	13.0381	41.6502	23.9077	1.98878	0.250012	12.3109	12.9013	8.31249	1.3795	10.0672	7.5089	37.8944	47.4642	2.97126	1.11225	9.11329	3.00886	0.708323	97.0923	1.09842	28.1916	7.31767	7.46721	3.3488	28.9881	1.1509	0.327216	0.0227958	0.656038	0.482917	4.59857	7.81003	16.217	6.73752
TCGA-P5-A737	374	0	429.148	3.71665	7.1668	23.6737	8.77407	1.33312	0.395828	6.17423	0.343161	0.0886756	0.00800135	0.804577	0.038682	8.17788	27.4259	17.5706	2.81881	0.274392	6.91634	18.261	7.60266	2.10591	6.72766	5.66466	29.1567	21.0214	7.32604	0.588968	35.394	2.24124	0.0870267	12.1001	1.25601	32.5627	7.39236	5.00398	2.40034	39.3891	0.956659	0.83672	0.029408	0.0528956	0.149092	2.99955	6.45282	8.88417	7.70566
TCGA-QH-A6X8	511	0	306.617	2.33447	12.9337	22.117	10.0499	0.927693	0.461667	5.65144	0.138611	0.107372	0.00706988	0.612231	0.0359777	13.2164	39.1798	19.918	3.67302	0.0893232	6.73316	22.4903	6.5356	2.89409	6.67609	5.1966	37.9281	60.1758	4.47023	0.799816	19.7958	3.82793	0.0299038	16.4058	1.89708	38.0192	13.7623	5.09719	3.16234	41.0402	0.682995	2.57761	0.0103938	0.537485	0.0658679	2.91893	8.01271	7.43604	8.89289
TCGA-DU-8166	518	0	294.281	6.75314	12.7566	23.4327	11.4191	2.86232	0.458599	11.9188	0.25748	0.0659553	0.0210125	0.499974	0.0235875	6.13722	43.5713	17.9857	6.8307	0.182192	14.1792	11.873	11.4793	2.33023	17.0941	9.75234	13.996	21.3769	8.43489	0.464072	14.956	7.17042	0.216593	20.3188	3.12181	27.3385	15.8691	7.95301	3.02172	49.8949	0.780292	0.180491	0.0363431	0.0612839	0.201525	2.66073	8.23244	8.12631	7.73831
TCGA-S9-A7IY	717	0	323.325	3.84131	13.5828	21.5173	13.6436	4.35942	0.591469	14.2931	0.0578313	0.0581159	0.0393292	0.504147	0.0340241	11.3347	22.6747	23.6782	4.00916	0.0709855	7.88224	12.5012	6.07792	1.90363	7.07823	6.23449	23.2064	95.721	4.55676	0.419673	25.9471	5.1922	0.0998117	18.6507	5.82542	32.074	20.1811	7.16973	2.76077	45.5979	0.917887	0.125976	0.02891	0.305499	0.177975	3.52015	7.61746	6.2295	8.41578
TCGA-P5-A72U	9	0	279.549	2.60742	13.56	16.2425	8.69392	7.48316	0.517481	8.31966	0.0188499	0.83032	0.0230746	0.19719	0.0195706	10.9901	37.3884	8.63914	2.00617	0.16659	14.2124	16.3217	2.94911	3.173	7.84278	3.72158	25.9724	1.66954	2.33282	0.0949938	6.81816	8.77957	0.0464761	10.0516	4.58183	34.8583	17.2291	4.67876	3.00681	20.8169	0.434059	0.050723	0.00565386	5.70126	0.0255927	3.5421	8.15683	5.18835	6.34911
TCGA-HT-7481	1802	0	215.004	4.96888	14.9967	22.5591	14.926	1.94584	0.44879	3.42279	0.265085	0.137491	0.0223309	0.69774	0.0390635	8.48824	28.753	20.5374	3.90752	0.2729	10.3065	16.6584	8.56602	1.77755	11.2563	7.21699	20.7954	133.351	6.954	0.66536	45.9785	1.55119	0.177102	36.3995	1.24992	27.0394	4.47244	6.61262	3.10758	53.8139	0.453889	0.19723	0.015389	0.455565	0.134676	2.60909	8.00381	6.27719	9.58362
TCGA-DU-A7TJ	19	0	164.818	6.0062	16.7048	25.6412	12.0533	2.45224	0.616789	17.7935	0.0315006	0.630474	0.244217	0.318545	0.0114467	12.5778	66.4115	10.0855	3.07233	0.00386656	19.1539	30.4911	5.3194	4.08407	20.1582	7.91939	21.0858	6.04564	33.3344	0.365117	7.48093	5.88319	0.0970842	8.86314	4.77257	32.8889	14.9176	7.77813	3.37896	26.1223	1.29091	0.0544914	0.0188966	0.0159323	0.00855374	2.56132	10.0616	8.41887	4.96825
TCGA-DH-A7UT	409	0	812.218	2.89568	11.4228	17.3938	13.6808	3.67445	0.579232	8.5948	0.0588012	0.303331	0.0364698	0.828366	0.0610494	11.7903	37.1794	19.6566	2.57981	0.202093	12.9918	15.4361	4.18146	1.48406	9.92638	4.78512	20.2581	106.889	4.63115	0.355593	18.7511	5.52792	0.0405943	14.5038	4.19769	28.3116	17.5839	5.81376	2.61268	31.8504	0.725206	0.108499	0.028219	1.08652	0.0830285	4.26624	5.82322	8.21944	8.40956
[truncated: 198 more columns]
