# Supplementary material for: Characterization of the Ferroptosis-Related Genes for Prognosis and Immune Infiltration in Low-Grade Glioma
Source: Front Genet. 2022 Apr 26;13:880864. doi: 10.3389/fgene.2022.880864 (PMC9086515; doi:10.3389/fgene.2022.880864)
Supplement: Supplementary file 3 [file Table6.XLSX]

## Sheet: Table S1
Table S6. Fifty-five intersecting prognostic FRGs.
ABCC1
AKR1C1
AKR1C3
ALB
ALOX5
ANGPTL7
ARNTL
ATG7
ATP6V1G2
AURKA
BID
CAPG
CAV1
CBS
CD44
CEBPG
CISD2
CYBB
DPP4
EIF2AK4
FTL
G6PD
GCH1
HAMP
HMGB1
HMOX1
HSPA5
HSPB1
LAMP2
MAP3K5
MT3
MTDH
MTOR
MUC1
NCF2
NNMT
NOX4
NQO1
NRAS
PCK2
PGD
PLIN2
PRDX1
PRDX6
PRKAA1
RIPK1
RRM2
SAT1
SCD
SCP2
SESN2
SLC1A4
SLC1A5
SLC38A1
SLC40A1
