# Supplementary material for: Characterization of the Ferroptosis-Related Genes for Prognosis and Immune Infiltration in Low-Grade Glioma
Source: Front Genet. 2022 Apr 26;13:880864. doi: 10.3389/fgene.2022.880864 (PMC9086515; doi:10.3389/fgene.2022.880864)
Supplement: Supplementary file 5 [file Table4.XLSX]

## Sheet: Sheet1
Table S4. Data for Univariate Cox regression analysis in the CGGA dataset
id	futime	fustat	RPL8	IREB2	CS	EMC2	ACSF2	NOX1	CYBB	NOX4	NOX5	DUOX1	DUOX2	G6PD	PGD	VDAC2	PIK3CA	FLT3	SCP2	TP53	ACSL4	LPCAT3	NRAS	KRAS	HRAS	TF	TFRC	TFR2	SLC38A1	SLC1A5	GLS2	GOT1	ALOX5	KEAP1	HMOX1	ATG5	ATG7	NCOA4	ALOX12	ALOX12B	ALOX15	ALOX15B	ALOXE3	PHKG2	ACO1	ULK1	ATG3	ATG4D	BECN1
CGGA_1488	2586	0	9.97324	3.69992	5.72957	5.98865	3.38911	0.132543	4.74262	0.237232	0.0888399	1.23763	0.0948405	4.09987	5.95435	6.18052	3.51177	0.295904	6.19255	4.93374	3.88969	4.03123	3.98771	3.39663	5.68558	8.06309	3.67055	1.83333	4.19714	2.60763	1.86963	4.87991	3.60913	5.49486	3.51316	3.09903	4.04606	5.959	0.0782527	0.0993445	0.0483933	0.17336	0.0951706	3.891	3.76143	3.94786	5.59533	3.9236	5.32597
CGGA_D33	116	1	11.8804	2.86803	5.28874	4.34471	2.89664	0.00142661	1.39672	1.32333	0.0960748	0.38555	0.202342	5.83803	6.28645	7.19789	2.8904	0.264469	4.96411	4.59273	3.12816	3.74557	3.2363	2.39119	6.16921	7.96618	3.70952	3.7583	2.80656	2.95557	2.01725	5.12091	2.40503	5.29695	7.17422	2.76576	3.84108	5.01829	0.18983	0.994355	-0.000553072	1.15305	0.413473	3.03925	3.08005	4.0986	5.65154	4.05177	4.94517
CGGA_2081	961	0	10.0138	2.72681	6.0812	5.55152	2.34186	-0.00684111	1.23002	1.30694	0.185121	0.568561	0.0398427	4.80926	5.55477	6.8764	2.82067	0.0648166	5.74194	4.63052	2.61357	3.48991	2.97596	3.01426	6.6393	6.79444	4.73872	0.912727	3.4662	0.703546	1.04716	5.23937	1.20271	5.80555	4.55713	2.58929	3.04195	5.88464	0.108028	0.507012	-0.00268873	0.187044	0.0270543	4.2926	3.82759	3.15425	5.66986	3.69965	4.85465
CGGA_135	1924	1	10.4298	3.70103	5.70332	5.1945	3.74883	-0.00684111	6.11436	2.33842	0.161705	1.12986	0.08129	5.42257	6.35299	5.88306	3.57739	0.307713	6.56083	5.23729	4.00209	4.69631	4.24552	3.45507	5.82832	7.98223	4.75184	2.00739	4.59533	4.0828	1.09315	3.89031	6.29607	5.70622	7.33198	3.1473	4.41119	5.97914	0.0782527	0.033653	0.396707	2.27986	0.013027	4.34489	3.81633	4.61657	5.77919	4.64974	5.32055
CGGA_1238	2996	0	10.0213	2.97625	5.43406	5.20572	6.23156	0.0339544	4.32086	0.491883	0.196674	1.295	0.37531	4.87308	5.81522	6.25127	2.43954	0.185008	6.63621	4.02493	2.92572	3.92997	3.46572	2.63916	6.11167	6.49818	3.219	1.49971	4.75263	3.9918	0.741367	4.05209	5.78633	5.53364	4.33811	3.13779	3.39957	5.80512	0.498045	0.00647017	-0.00268873	2.3441	0.0409434	4.47833	3.42754	4.39754	5.57266	4.30241	5.27593
CGGA_28	1103	1	10.749	1.7178	4.52372	4.57411	4.04846	-0.00684111	1.74254	0.136631	0.0762921	0.895966	0.108262	3.34729	5.03575	5.39749	1.95486	0.0366828	5.87629	3.19312	1.81411	3.25573	2.89956	2.35783	6.71084	6.41784	1.85998	1.46282	3.00144	1.74883	0.906533	3.24169	1.11653	5.23683	3.90586	2.45774	2.99879	4.40715	0.194125	0.221988	0.0483933	0.640572	0.0683177	3.51809	2.74066	3.01122	4.774	4.31835	3.98148
CGGA_678	386	1	10.0807	2.70253	5.06549	4.48282	4.99378	0.0939191	3.49644	1.55971	0.0781413	1.3821	0.367857	4.52141	4.72442	4.17376	2.85358	-0.00289617	5.41707	5.3389	1.95196	4.0068	3.44656	2.32057	6.17068	2.9181	4.36002	3.03284	0.47179	2.42103	1.37164	2.72638	3.17223	7.28992	6.2227	2.93825	4.16808	3.63646	0.622296	0.423758	0.162191	0.212047	0.156871	3.57028	3.32385	4.56564	4.74461	5.35218	5.36106
CGGA_2013	139	1	10.7992	1.80366	5.34313	5.35644	4.64106	-0.00684111	2.37626	0.491883	0.285605	1.02124	0.0676086	4.613	5.89561	6.51065	1.77106	0.146052	6.74423	4.36645	2.13964	3.69725	3.27125	2.18842	6.86914	8.30327	1.35905	0.243048	3.51755	3.02463	0.312557	4.1366	2.87372	5.76075	5.52981	2.38214	2.98292	5.05746	0.151663	0.00647017	-0.00268873	0.227349	0.013027	4.32107	3.46295	2.53922	5.08045	3.8837	4.0231
CGGA_1002	305	1	10.3464	2.42572	6.01864	5.14937	4.29032	0.0936718	2.73723	0.783567	0.161705	0.837672	0.0537937	4.58553	5.54526	6.54847	2.03791	0.594562	6.28139	3.30428	3.61273	3.30193	3.03831	2.85309	7.13734	8.97747	2.90489	2.84333	3.69342	2.29903	4.11197	6.39405	4.25082	6.36214	7.71704	3.38684	3.71135	5.01098	0.262449	0.58123	0.223748	0.240543	0.825898	4.69158	3.32052	4.41339	5.1396	4.7681	5.28296
CGGA_1523	2508	0	10.1812	3.28543	5.88247	5.70991	4.09281	0.0339544	4.08966	0.580207	0.230734	1.62977	0.283923	4.64346	5.9073	6.33735	3.16293	0.687762	6.85149	3.72582	3.47736	3.91445	3.91906	3.062	5.41674	7.63262	4.2572	1.24557	4.75323	2.89294	2.09787	4.75001	4.26968	5.17637	3.92379	3.31698	3.51329	5.88689	0.554612	0.162035	0.0483933	0.304791	0.293354	4.01583	3.80212	4.52594	5.4194	4.35192	5.41341
CGGA_482	2511	1	10.5303	2.88517	6.25868	5.64048	3.27584	-0.00684111	3.88298	1.53205	0.063623	1.24411	0.418883	4.37603	5.78078	6.82698	3.36517	0.463579	6.10663	5.1753	4.04842	4.33574	3.63596	3.2573	6.20136	8.77703	3.97171	1.0519	5.11157	2.0985	1.13763	4.63422	3.05867	5.67231	4.39465	3.32661	3.55808	6.17585	0.587603	0.758871	0.0980086	0.425437	0.0818081	4.114	3.48765	3.89016	5.80572	4.47638	5.62261
CGGA_1651	842	1	10.4005	2.46419	5.61331	4.96151	3.9413	0.189508	2.01145	0.511995	0.161705	0.638091	0.0398427	4.74681	5.60865	6.75488	2.07548	0.80884	5.92784	2.48215	3.78357	2.83767	3.03438	3.15079	7.23759	7.21268	3.39994	3.78796	3.28637	1.89358	3.80131	6.81473	3.59315	5.57684	3.20967	3.1938	3.99335	4.76419	0.288971	1.32861	0.0650905	0.689776	0.735972	4.41586	3.43649	4.64558	5.19284	4.45023	5.24779
CGGA_1120	422	1	7.16921	1.65902	4.16601	3.23775	2.5677	-0.00684111	1.35282	0.724725	0.113581	0.568561	0.0398427	2.53446	3.45452	2.70989	1.40837	0.106009	2.78255	2.76042	1.68274	2.44127	1.02957	0.913735	3.35843	5.53132	2.4451	0.618291	2.19381	1.91014	0.985669	2.04558	0.885342	3.95124	3.08186	1.00773	2.75535	3.39533	0.249019	0.186331	-0.00268873	0.436975	0.0409434	2.09493	1.62016	2.28341	2.42772	2.84478	3.18254
CGGA_1587	750	1	11.0386	3.55307	6.33896	4.70052	3.74883	-0.00684111	4.51487	0.961226	0.274813	1.27612	0.0676086	5.09843	6.07239	6.65336	2.82532	0.17214	7.18055	3.36885	3.14136	4.25964	4.07509	2.92522	5.19995	7.72977	3.14007	0.423671	2.31039	3.26343	0.950267	4.08031	4.3216	5.8132	4.90569	2.79054	3.85923	5.91359	0.692845	0.112114	0.798713	1.28624	0.0818081	4.36825	3.78387	3.6652	5.74103	4.1691	5.41026
CGGA_1747	293	1	13.3675	1.59165	5.57044	4.77824	5.5404	0.151707	3.79107	0.663315	0.0762921	1.257	0.0948405	3.99417	5.71741	6.18903	1.61693	0.0648166	4.96295	3.97089	2.32081	4.30746	2.8596	1.87667	7.7314	6.81703	2.20025	0.510475	1.4054	4.6093	0.34649	3.5888	3.39727	7.04192	5.05202	2.75878	4.24686	4.5096	0.463105	0.137301	-0.00268873	1.53496	0.0951706	4.68156	3.03154	3.81735	4.46415	4.98572	4.14634
CGGA_715	3429	0	7.91234	2.12449	5.71343	4.54498	2.82489	0.0301116	1.13617	0.162246	-0.0140683	0.599787	-0.02705	3.84484	4.63853	6.60952	2.74956	0.938795	4.01487	3.14064	3.70317	1.88286	1.9435	3.07821	6.48482	7.59646	3.16585	2.14335	4.53693	0.17313	4.1856	7.48804	0.932634	4.9961	1.64972	3.20034	3.484	4.74485	0.407957	1.04603	0.0633396	-0.108562	0.680434	4.19744	2.26409	4.48246	4.46186	3.87413	4.899
CGGA_157	914	1	12.1189	1.9598	4.95344	4.79385	4.92794	0.151707	3.01338	1.11245	0.306926	1.08736	0.173528	4.47055	5.80039	6.32223	2.00792	0.0224062	5.78622	3.68559	2.39044	3.16953	3.09591	2.13403	8.16094	7.08854	2.56835	1.361	2.23017	3.54814	0.822517	4.21061	3.95433	6.88049	4.48045	3.02821	3.69678	4.42071	0.0932105	0.535316	0.0650905	1.635	0.246358	4.86843	2.85269	3.67619	5.10734	5.80072	4.35582
CGGA_P131	1596	0	10.1576	3.48926	6.23384	5.60603	2.51211	-0.00684111	4.04626	0.319722	0.0888399	1.2634	0.0676086	4.54706	5.39174	6.67637	3.20873	0.295904	6.14664	5.01687	3.9032	3.68746	3.37669	3.4696	5.43934	5.76994	3.97472	2.01991	5.59893	1.67284	2.3739	5.12466	2.47912	5.60229	3.65134	3.43305	3.80046	6.10551	0.22181	0.813319	-0.00268873	0.145603	0.316277	4.33042	3.70506	4.58542	5.54105	4.20553	5.57632
CGGA_738	4132	0	10.4485	3.97217	5.78732	4.8598	4.41736	0.162048	5.14172	0.583697	0.378272	2.29297	0.92963	4.84515	5.63695	6.04571	3.81966	0.193004	5.56216	4.07541	3.32021	4.2925	3.39657	2.4745	6.34746	7.27422	3.55404	2.81171	4.07831	4.91331	2.17217	4.21418	5.61695	5.41571	4.91143	2.6223	3.94689	5.18049	1.23732	0.32119	0.226441	2.9579	0.296715	4.54002	2.47497	4.38251	4.88907	4.96672	4.96804
CGGA_369	4606	0	10.4742	2.31601	5.58806	5.36565	4.13319	-0.00684111	2.46291	0.750245	0.263931	0.803311	0.0537937	4.47463	5.51314	6.72286	1.90426	0.565379	6.03528	2.82617	3.15168	3.15977	2.84828	2.62152	6.85249	8.95692	3.37685	3.12401	3.50743	1.84698	3.62172	6.86637	2.51804	5.73773	4.02794	3.07084	3.48299	5.00298	0.315055	0.774649	0.0980086	0.354243	0.718987	4.56503	3.06275	4.30121	5.45854	4.41432	5.21419
CGGA_1533	1217	1	11.1717	1.92917	5.11934	4.65863	5.16358	0.0936718	2.91173	2.35469	0.161705	0.967722	0.318888	5.88792	5.59391	5.95759	1.3666	0.0786793	5.42931	4.01162	2.18375	3.42753	2.46745	1.62807	7.72239	9.27702	3.08159	2.01366	1.90009	3.55699	0.757988	4.24088	5.67095	6.17683	5.99871	2.66307	3.43305	4.53885	0.288971	0.0734439	0.0483933	2.36594	0.293354	4.89375	2.96301	3.8508	5.2971	5.12756	4.66986
CGGA_881	252	1	9.90407	3.7701	6.76015	5.26287	4.40997	-0.00684111	4.48607	1.89656	0.398801	0.548086	0.248072	4.77336	6.11051	5.53225	3.69712	0.146052	7.13507	5.89815	3.07944	4.41709	3.92401	3.82048	5.85646	3.56338	4.3818	1.14921	4.46022	3.65902	2.03138	3.35276	4.9158	5.36895	2.91948	3.0908	4.17684	6.48861	0.598449	0.0603081	0.223748	1.5937	0.054697	4.28718	3.64713	4.47277	5.42967	4.19975	5.68858
CGGA_1368	2797	0	7.09582	1.81822	4.1742	3.59284	0.938118	-0.00684111	1.68554	1.31261	0.125779	0.676417	0.0676086	2.64132	3.31505	3.20368	1.26362	0.342568	3.14789	3.86089	2.17286	2.58796	1.12797	0.855147	3.01727	4.69696	3.14744	1.15507	3.69723	0.569957	1.65649	2.6252	1.28969	4.04875	0.846652	1.90445	3.47561	3.71211	0.365964	0.366615	-0.00268873	0.0738302	0.013027	2.64012	1.27662	3.77752	2.56804	2.79876	3.48391
CGGA_1108	684	1	9.93508	3.65473	6.19773	5.28019	4.30454	0.0339544	5.41359	0.886721	0.101269	1.52092	0.646328	5.14752	6.40354	6.13572	3.81989	0.494884	6.57792	5.61612	3.84727	5.20125	4.19439	3.5572	5.05084	7.10021	5.63629	1.89951	4.14825	5.42724	1.2856	4.07947	4.45169	4.75221	6.13449	3.6672	3.86478	5.69959	0.692845	0.0993445	0.410368	1.22026	0.160147	4.15561	3.92379	4.35234	5.61483	3.99377	5.67541
CGGA_1648	1747	0	12.0716	1.91134	4.42951	3.02435	5.87352	-0.00684111	2.27247	0.939285	0.0248644	0.484923	0.0398427	4.74963	4.7431	5.49934	1.51995	0.0924094	3.67756	2.32436	1.82369	4.20266	2.2227	1.7829	8.91644	9.37559	1.82175	0.574391	1.81117	2.6993	0.323962	4.07353	0.792633	7.27383	2.30578	2.32612	4.16728	3.82363	0.35339	0.033653	-0.00268873	1.74292	0.0270543	4.22917	2.33181	3.31366	3.71271	5.87472	2.78524
CGGA_P121	1608	0	11.3646	2.2419	5.25445	4.56732	4.88775	0.0339544	1.65021	0.296642	0.0379116	0.506275	0.0398427	4.78209	5.03758	6.54043	1.61693	0.50517	5.33486	1.76904	2.94596	3.15977	2.48565	2.488	8.49541	9.07037	3.2449	2.40344	2.57544	1.64323	3.75812	6.63773	2.80203	6.59915	2.69016	3.14255	3.86016	4.36639	0.520916	0.782471	0.340955	0.366351	0.593992	4.59169	2.52156	4.07373	5.06284	5.18704	4.69156
CGGA_1508	1049	1	10.897	1.88411	4.84671	5.35247	4.77465	0.0936718	3.62477	0.511995	0.0888399	0.879541	0.223658	4.68857	5.68797	5.80552	1.45547	0.545589	5.93331	3.03585	2.21588	3.44341	2.60083	1.92547	7.50688	8.19286	2.55141	0.947164	3.54608	3.46451	1.05383	4.10212	5.36794	5.76868	5.36228	2.75878	3.44192	4.72858	0.451285	0.0603081	0.0145069	0.765231	0.0409434	4.61177	3.19897	3.75619	5.33997	4.47119	4.90707
CGGA_1416	1933	1	11.9271	1.89325	5.66121	4.37215	3.55402	0.0739577	1.49274	1.15103	0.0248644	0.598757	0.0257529	4.29223	5.65388	6.87715	2.07136	0.106009	5.24261	4.58108	2.90308	4.03207	2.83914	2.43925	7.98908	6.67496	4.05927	1.39087	3.36397	1.85128	1.34594	4.90125	1.70064	7.16763	3.85071	3.26913	3.46572	5.02781	0.651587	0.964793	0.0315332	0.292164	0.0951706	4.29079	3.17413	3.52109	5.20448	4.88047	5.25784
CGGA_P505	924	0	10.4438	2.65604	5.59338	5.85611	3.82914	-0.00684111	3.4176	0.225043	0.252958	0.647765	0.0257529	4.32994	5.99802	6.45913	2.27367	0.132828	6.52667	4.8384	3.07217	4.67847	3.93289	2.66884	6.67053	8.41967	2.84205	1.89269	2.47953	2.38941	1.3243	4.85074	3.34668	5.9988	4.71351	3.19835	3.99418	5.68034	0.0479047	0.0734439	0.208522	0.0738302	0.0951706	3.99538	3.10319	3.51435	5.9348	4.03847	5.17162
CGGA_1530	2497	0	13.2822	3.64434	3.73273	2.98787	5.89729	-0.00684111	1.96923	1.70055	0.64932	2.95154	1.75446	3.95457	5.13384	5.13001	1.44219	0.0786793	4.02862	2.66264	1.87053	4.06195	2.72672	1.31279	8.86098	7.5733	3.25002	3.18271	0.926938	3.24621	0.822517	3.62409	0.654848	6.8239	4.1212	2.0953	4.12452	3.59441	0.00125961	0.00647017	0.924452	2.26002	0.467079	4.06806	3.06103	3.73356	2.90799	5.23223	2.86768
CGGA_1704	2064	0	12.4549	1.80853	5.2774	4.56917	5.90234	0.24494	3.04049	0.491883	0.113581	1.17797	0.0948405	4.28887	5.68714	6.09918	1.46206	0.106009	5.19207	3.76274	2.04263	4.21221	2.76125	1.83997	8.02819	8.56829	2.71708	0.510475	2.11427	2.81997	0.34649	3.50735	1.63261	7.71715	4.00391	2.70848	4.12452	4.17349	0.315055	0.245254	0.081628	0.131526	0.0818081	4.54123	3.37784	4.27705	4.62349	5.61874	4.42171
CGGA_1228	2626	0	10.2612	2.72681	5.5839	5.1881	4.59457	0.452858	2.95279	0.386773	1.15077	1.13683	0.0948405	4.82485	5.71363	6.53859	2.33583	0.705697	6.27257	3.38169	3.64242	3.50379	3.05198	2.96857	6.9779	7.54189	3.09502	3.00611	4.12033	2.32065	3.93209	6.2473	3.31802	5.6981	5.85058	3.22387	3.30648	5.25873	0.94625	0.438608	0.326732	0.589665	0.864951	4.46379	3.34814	4.51663	5.20448	4.57444	5.23402
CGGA_1407	2728	0	12.1205	1.18843	4.42133	3.10818	5.52361	-0.00684111	1.81867	2.32195	0.0508303	0.713785	0.108262	5.10663	5.53101	5.59492	1.64009	0.210403	4.65454	3.46162	2.4536	4.63307	2.15448	1.76823	9.02694	7.68777	3.27701	1.28336	2.19749	1.08655	1.37776	4.98119	1.3253	7.65605	2.70059	2.58684	3.8895	3.46803	0.165944	0.608058	0.0483933	0.599989	0.108408	4.57557	2.99051	3.77383	3.51792	5.07614	3.93421
CGGA_490	3804	0	10.0162	2.32524	5.10501	5.691	4.11571	0.0579729	2.52009	0.415651	0.0600425	1.06009	0.0441647	3.79926	4.33156	6.1526	2.36152	0.276042	4.41885	3.41832	2.67272	3.33946	2.51631	2.51377	6.74428	9.40397	2.72947	1.53165	5.20689	2.03577	1.85614	5.02559	2.51416	5.18766	3.26913	2.96988	3.1564	5.25732	0.425197	0.728789	0.0211608	0.30412	0.00269431	3.85053	3.35481	3.47371	5.28616	3.99565	4.49982
CGGA_1189	3082	0	10.418	2.77189	6.09413	4.7606	3.37026	0.111405	1.55265	0.743876	-0.0140683	1.09012	-0.0125318	3.227	4.7434	6.77499	3.57831	0.459778	3.74772	4.8878	3.00914	3.2762	2.52033	3.10987	5.69547	7.58154	3.72841	1.96889	5.02184	1.12411	1.51994	3.68693	1.60383	5.4757	2.70671	3.46075	3.40931	5.93473	0.220601	1.18413	-0.000553072	-0.135597	0.209239	3.7011	3.70156	4.0804	5.00918	4.07355	4.0463
CGGA_1589	342	1	9.44523	3.46282	5.95216	5.3052	3.13694	0.0540532	2.82846	0.419138	0.447192	0.695218	0.318888	4.45646	5.46817	6.60761	3.31348	0.705697	5.94863	2.76266	4.62418	3.12504	3.33054	3.90001	6.01465	7.91024	4.27663	3.34395	4.83539	1.21442	3.6507	6.79266	3.0793	4.96754	3.25814	3.606	4.23637	5.64365	0.520916	1.05722	0.177661	0.390271	0.648923	4.15091	3.47041	4.73768	5.20167	3.93636	5.48707
CGGA_721	2552	1	10.2836	3.18492	5.60806	6.25338	3.40669	0.0936718	4.41906	0.724725	0.113581	1.55284	0.108262	4.57212	5.68438	6.47072	2.96806	0.331044	6.09418	4.07434	3.8117	3.94351	3.53305	3.01613	6.47463	7.96423	3.59457	3.22483	4.01197	3.60894	2.92314	5.73913	4.43753	5.38858	4.58416	3.18463	4.48613	5.9407	0.662003	0.677139	0.146239	1.43929	0.293354	4.25357	3.80687	4.37976	5.32796	4.08306	5.59276
CGGA_1809	343	1	10.7045	3.18159	5.59132	5.50162	3.19611	0.0339544	2.63675	3.17226	0.728334	1.46617	0.0948405	4.61247	6.05383	6.12881	2.45194	0.283997	7.26028	4.20566	3.40469	4.01176	4.05826	3.13896	6.13424	7.67108	3.30184	3.19602	4.62914	2.85798	1.79452	4.32276	4.41282	5.59443	4.1046	3.56804	4.84639	5.52808	1.04701	0.162035	-0.00268873	0.5153	0.121522	4.37557	4.02041	3.16463	5.95076	4.37624	5.29446
CGGA_P338	1198	0	9.92526	2.8576	5.2842	5.8267	3.85329	-0.00684111	3.36338	1.69194	0.0379116	0.495638	0.0398427	5.46995	5.87859	6.45094	2.94286	0.247672	6.58074	4.953	3.87013	2.97988	3.50326	3.12702	6.28611	8.58173	3.44795	3.03469	4.75862	1.93866	1.87328	5.77233	3.3823	5.41705	4.70186	2.95321	4.69782	5.85707	0.0631516	0.468342	0.0980086	0.746727	0.648923	3.85643	3.74757	3.74869	5.95076	3.45311	5.19403
CGGA_510	4403	0	8.78409	2.37659	5.35924	6.04386	3.96426	0.0487744	3.22074	0.359058	-0.0521997	0.415539	-0.02705	3.93336	4.4267	5.91033	2.86201	0.168372	4.02954	3.9512	2.6433	3.44843	1.89567	2.70682	5.75902	8.40147	3.39994	0.719988	6.12903	1.18851	1.35214	4.07208	2.14676	5.63524	3.6963	2.67743	3.52381	5.7246	0.114847	0.577767	0.0318586	-0.0305278	0.0319266	3.3444	3.42961	3.17414	5.49328	3.10931	4.93837
CGGA_1723	1986	0	11.6502	2.57311	5.74773	4.71271	3.76959	0.151707	1.90594	0.816119	0.0762921	1.09452	0.0537937	4.40341	5.62988	6.81222	2.04214	0.210403	5.87554	4.70253	2.82831	3.55066	2.72672	2.31672	7.09728	8.35145	3.2602	2.06285	4.13156	1.80766	1.87328	4.87991	2.95219	6.5121	3.40888	3.12339	3.3545	5.11568	0.275766	0.616886	-0.00268873	0.471055	0.22226	4.5544	3.30224	4.11193	5.42293	4.78565	5.24563
CGGA_1607	1333	1	11.4876	2.64848	5.58924	5.58858	3.90918	0.0136576	3.87679	3.35458	0.45666	0.558359	0.0257529	4.97624	5.73241	6.95357	2.47337	0.463579	6.32545	4.69609	3.1704	3.79534	3.13294	2.95689	6.68907	5.4875	3.85427	2.13634	4.58252	3.37121	1.32974	4.36627	4.26515	5.96305	5.61684	3.19987	3.36257	5.63788	0.403096	1.39008	0.0980086	0.145603	0.210054	4.33739	3.18816	3.85859	6.02382	4.26992	5.34443
CGGA_1335	2839	0	11.2689	2.45248	5.55441	5.02501	4.32878	0.151707	2.6691	0.261298	0.101269	0.803311	0.0537937	4.43981	5.47208	6.80162	2.00792	0.146052	5.89624	4.36919	3.27269	3.53236	2.91693	2.80779	7.27199	7.8663	2.81655	2.17027	4.8416	1.45102	2.57531	5.74833	3.09027	6.52642	3.43722	3.27913	3.3259	5.2234	0.702994	0.544623	-0.00268873	0.17336	0.246358	4.47885	3.36172	3.89521	5.51706	4.40996	5.1743
CGGA_P446	1009	0	10.8689	4.5308	6.6323	4.83153	1.23462	-0.00684111	1.38193	1.94789	1.9252	0.759218	0.0398427	4.40648	6.12965	7.12631	3.62735	0.132828	6.16941	6.8674	4.02152	3.948	4.14281	3.65865	5.53493	4.15034	3.71491	2.69152	6.31298	1.62314	1.05383	4.1575	0.635354	6.34761	4.64218	3.33345	3.33959	6.44769	0.137252	0.951066	-0.00268873	0.0884677	0.147389	3.90588	3.63522	4.03136	5.777	3.76766	5.59249
CGGA_1720	1994	0	10.1274	4.31944	6.36409	5.93522	3.41756	0.132543	3.027	0.331121	0.338272	1.64963	0.0948405	3.84416	6.03942	6.53703	3.91911	0.210403	6.50826	5.12295	3.89259	3.90893	4.63369	3.74741	5.33956	5.52438	4.94181	1.14332	4.56137	2.15141	1.57733	4.25353	2.42111	5.18239	3.30161	3.48492	3.53469	6.21213	0.0932105	0.162035	0.0315332	0.26658	0.0683177	3.88015	3.64281	3.75619	5.54105	3.68521	5.41593
CGGA_1051	838	1	10.037	2.61265	4.99154	5.04886	4.00735	0.132543	1.73694	0.521944	0.219478	0.920269	0.121558	3.78765	4.65473	6.15368	2.07548	1.30223	6.09751	2.12076	3.74509	2.60301	2.83225	2.79233	7.04556	7.28424	3.06022	3.16793	3.86336	1.66304	3.82935	5.99965	3.15282	5.17805	2.23942	3.08418	2.67753	4.69258	0.35339	0.820924	0.223748	1.01803	1.00421	4.18674	3.09153	4.35822	5.0068	4.63841	4.72232
CGGA_1147	3215	0	10.3789	3.52538	5.8709	5.99224	3.89282	-0.00684111	2.86692	0.481718	0.447192	1.05099	0.08129	4.08495	5.95121	6.3724	2.83226	0.17214	6.46953	3.98733	3.20704	3.67098	3.78854	2.98781	6.37325	6.3552	3.13822	1.86158	4.60336	2.02087	1.90924	4.82568	3.15877	5.6617	3.89227	3.03858	3.40996	5.32151	0.0932105	0.256741	-0.00268873	0.17336	0.054697	4.05065	3.58642	4.05383	5.54903	4.51109	5.45886
CGGA_564	679	1	8.55624	2.63326	4.75256	6.17977	5.79778	0.178358	3.73131	0.952313	0.362749	1.96898	1.00442	3.92953	5.75976	4.22027	1.20809	0.193004	7.4175	4.1073	2.63482	3.93352	3.7783	2.7962	5.69209	7.89014	5.4701	3.0787	2.12326	1.95424	2.11109	4.32042	3.85015	5.56281	4.2564	3.58966	4.09328	4.59443	0.759776	0.566423	0.613073	0.233051	0.34451	4.42555	4.45654	3.39543	5.34316	4.28311	5.75144
CGGA_P163	855	1	10.0611	3.94923	5.86138	5.82579	2.99031	0.0339544	5.38985	0.654319	1.3126	1.22457	0.0676086	4.12613	5.62091	6.41277	3.86049	0.651205	6.47308	4.9481	4.33879	4.10076	3.93974	3.54114	5.58758	9.37862	4.65114	2.04461	5.22078	2.71092	1.49809	4.68145	4.12309	5.63259	5.10752	3.29609	4.11687	6.23284	0.474838	0.162035	0.177661	0.317311	0.121522	4.2361	3.54269	4.17702	5.56588	4.27236	5.59412
CGGA_1048	703	0	10.097	3.13067	5.89323	4.80106	3.72773	0.0936718	3.64537	1.39496	0.0762921	2.21735	0.768775	4.88917	5.25618	6.97292	2.96389	0.185008	5.9125	3.71698	4.18365	3.94441	2.58698	3.16084	6.74534	7.54316	3.70761	2.73107	5.27237	2.44936	2.78291	6.0463	4.58815	6.14944	5.80561	3.09574	3.06886	5.35197	0.554612	0.448591	0.297928	0.200602	0.121522	4.81226	3.59206	4.69901	5.72827	4.46494	5.30172
CGGA_P328	580	1	9.79799	3.3829	5.79995	5.457	3.64879	-0.00684111	4.35848	1.06607	0.991461	0.837672	0.108262	4.95282	6.08907	6.28674	2.28774	0.222934	6.89764	5.43368	3.13095	4.91189	3.95625	3.15247	5.54444	6.82782	3.79497	2.26989	4.07643	2.8538	1.14387	4.18745	4.67671	5.74982	6.93056	3.21792	3.67463	5.90992	0.0631516	0.19832	0.0650905	0.214037	0.054697	4.32107	3.65786	4.73461	5.7451	4.20937	5.10304
CGGA_905	3174	1	9.21982	2.54066	5.01927	5.15106	4.14477	0.0579729	3.97311	0.42672	0.131458	1.00425	-0.02705	4.72994	5.51219	5.59251	2.58252	0.117809	5.80097	3.16673	2.27631	3.48344	2.77174	2.1947	5.01925	8.26991	3.03643	0.968601	5.0328	3.43747	1.13602	2.62571	3.42344	4.77653	3.52692	2.76313	4.01507	5.38257	0.0925452	0.139367	0.0318586	3.27495	0.00269431	3.95125	3.43757	3.51639	4.79728	3.47017	5.06136
CGGA_431	4515	0	11.6647	4.09372	6.54591	4.5077	1.506	0.0579729	0.773197	1.11461	0.794693	2.25901	0.759143	4.7613	5.13133	7.98463	3.67327	0.104886	4.02754	5.13208	3.69169	2.6128	2.95614	2.96265	5.1281	2.86789	3.38018	0.793523	3.49781	1.76267	0.705253	4.55252	1.34767	5.92353	4.49361	3.13346	2.38694	6.41887	0.475497	0.931914	0.042453	0.243433	0.0887415	3.6227	3.63439	4.48246	3.95271	4.14102	4.95196
CGGA_861	893	1	9.44978	2.97038	5.59692	5.74724	3.39132	-0.00684111	4.87024	1.06607	0.185121	2.04971	0.295674	5.26824	5.79887	5.75616	2.8843	0.555518	5.94863	4.82673	3.53219	3.66544	3.47556	2.63414	6.30761	9.96642	3.18547	1.76754	4.05691	2.86628	1.86597	5.12958	4.8917	5.52759	5.69239	2.58684	4.15616	6.08751	0.378439	0.149724	0.130311	0.547632	0.0818081	4.24424	3.43138	3.93326	5.79187	4.25644	5.32123
CGGA_1579	2398	0	11.458	1.1319	5.14274	3.4521	4.87069	-0.00684111	0.907364	0.419138	0.113581	0.862934	0.0257529	5.04328	5.70876	6.23958	1.59335	0.6696	3.70619	2.76266	1.40514	2.89282	1.36353	1.7434	8.36572	7.71896	2.97125	3.10858	2.04233	1.01009	4.16045	6.60951	1.62327	6.24979	2.75912	2.66075	4.03796	3.29914	0.208028	1.26425	0.450716	0.471055	1.0181	5.07153	2.58063	4.59328	4.39887	5.33781	4.47347
CGGA_1190	3082	0	13.46	3.58554	6.1513	3.68975	3.13057	0.00142661	1.33656	2.26656	0.48363	2.29297	0.526881	3.32732	5.43028	7.18426	2.89205	0.585999	5.5016	4.99903	4.07814	3.97669	3.08007	3.12277	5.93879	4.07081	3.82231	2.75138	4.38055	0.499222	2.60006	4.82914	2.48749	6.00922	3.78325	3.71563	3.04845	5.69349	0.733496	1.0204	0.555179	0.212047	0.308807	4.81883	3.39349	4.32194	3.66927	3.81019	5.26676
CGGA_1688	51	1	10.5255	2.84467	5.6511	4.42038	5.90218	0.0339544	2.67201	2.14887	0.0379116	0.695218	0.590425	4.7729	6.66038	6.20177	1.84673	0.817109	6.38974	4.407	2.28454	4.34503	2.60358	1.88118	6.72825	6.60746	2.75432	1.75248	3.62301	5.12284	0.928575	3.54871	4.94142	5.73901	4.6523	2.63028	2.60907	4.93499	0.151663	0.65164	5.1787	0.689776	0.361034	4.52095	3.54152	5.47659	4.57166	4.09921	4.57775
CGGA_766	4103	0	11.1067	3.95825	6.64255	3.83002	2.78135	0.00142661	2.05658	0.213904	0.378272	1.82365	0.138465	3.52027	5.02581	7.55666	2.92979	0.193004	4.4987	5.34953	3.19741	3.79428	2.57577	2.91869	5.37958	5.14176	4.2626	1.74507	5.0379	0.962645	2.18809	4.09341	1.6661	6.07447	3.76538	3.06004	3.32961	6.10994	0.467257	0.531912	-0.000553072	0.851061	0.479414	4.02937	3.87977	4.33818	3.78181	3.55136	4.28277
CGGA_1161	3180	0	11.5372	1.98971	5.10769	4.40427	4.97954	-0.00684111	1.5768	0.750245	0.0379117	1.257	0.0948405	4.33903	5.36829	6.39331	1.63434	0.159155	5.70461	2.89906	2.71582	3.24507	2.68611	2.38555	8.24974	7.15481	2.84893	2.11906	2.32724	2.48793	3.40892	5.85526	2.63503	6.4128	3.22239	2.81334	3.60815	4.35473	0.474838	0.894742	0.146239	0.448423	0.556144	4.65053	2.86476	4.20111	5.0309	4.93635	4.62706
CGGA_635	4263	0	8.0415	3.66483	5.51921	5.95348	3.13345	0.0939191	2.81535	0.689261	0.0233367	0.582473	-0.0417113	3.92184	4.43156	7.1389	3.49576	0.649646	5.60793	3.67862	3.78669	3.16542	2.72486	3.45445	5.22865	8.29272	3.35458	1.6018	5.8047	1.01639	1.9271	5.08509	1.38107	5.6826	2.98542	3.38653	4.0401	6.2919	0.399244	0.373282	-0.000553072	0.953182	0.196317	3.34172	3.96363	2.92934	5.21492	2.9508	5.15393
CGGA_1359	343	1	10.5092	3.08124	5.6668	5.39706	6.20108	-0.00684111	3.83137	1.68761	0.113581	0.695218	0.0398427	5.04291	5.73826	6.75345	1.91825	0.0924094	7.47886	4.47073	2.72538	3.83691	3.30204	2.38859	6.85145	5.61001	2.72461	0.967419	3.84406	3.0375	1.03374	4.96026	4.9723	6.12283	4.09672	2.96055	3.33823	5.61271	0.498045	0.00647017	0.0145069	0.279428	0.013027	4.52593	3.44537	4.52388	5.41023	4.41486	5.30826
CGGA_1504	2558	0	12.1771	1.938	4.78614	4.2315	5.09149	0.0136576	2.9927	1.06607	0.565238	1.23112	0.08129	4.36657	5.6646	5.89197	1.62276	0.146052	5.45707	4.02757	2.1246	4.12444	3.02449	2.09264	7.67727	7.73718	2.32648	1.26189	2.5181	3.82342	0.681543	3.80015	4.66572	6.69322	4.42801	2.79263	3.33276	4.3639	0.662003	0.210205	-0.00268873	2.04926	0.0409434	4.90694	2.72956	3.36018	4.76399	5.55073	4.6989
CGGA_1474	333	0	6.48607	2.09117	3.77818	4.16422	2.3641	0.208152	2.7916	1.32387	0.0248644	0.240118	0.0398427	2.59408	3.26559	2.77832	1.88536	0.0508186	3.39608	2.54151	1.25889	2.20033	1.24326	0.960601	3.04552	6.21642	2.72461	0.161171	3.4987	1.834	0.957421	3.01348	1.9682	3.72004	2.32612	1.75285	3.67463	4.21523	0.208028	0.033653	-0.00268873	1.59893	0.0818081	1.77449	1.582	2.56293	2.69394	2.36778	2.96811
CGGA_507	302	1	10.3239	2.93657	6.01822	4.9506	4.72773	0.0739577	2.69788	0.0969716	0.208125	1.10166	0.0676086	4.6627	5.42799	6.49033	2.61428	0.575173	5.93686	3.24435	3.8055	3.56272	2.94044	3.54486	6.67007	6.63611	3.92157	3.42472	4.59331	2.10924	3.73321	6.40971	3.98823	5.45268	3.362	3.15517	3.60367	5.07795	0.403096	0.563048	0.326732	0.737387	0.841649	4.21327	3.57847	5.00073	5.3624	4.36555	5.19553
CGGA_858	3984	0	8.86623	2.12449	5.74059	4.78376	2.96919	0.120031	0.515613	0.175327	0.315428	0.730703	-0.0565184	4.17779	4.97599	5.81453	2.10784	0.760869	3.58205	3.27586	3.49322	2.80192	1.67505	2.71792	6.32656	7.9879	2.60363	2.82057	4.59053	0.974749	3.68307	7.41494	0.988333	4.94674	1.9883	2.55157	3.60356	4.98306	0.407957	0.600218	0.0211608	0.0191223	0.632639	3.6078	2.89543	4.65103	4.57541	3.52251	4.5618
CGGA_P115	1626	0	7.00007	1.2725	3.95604	4.05648	2.47667	-0.00684111	3.09753	0.733283	0.0508303	0.16212	0.0257529	2.86881	3.32023	2.365	0.800146	0.119482	2.84338	3.0738	1.40514	2.07221	1.11933	0.772643	2.578	1.54126	2.81655	0.685738	2.03411	1.50713	0.868985	2.36894	1.75692	3.32342	1.70481	0.99058	3.57306	2.68286	0.275766	0.112114	-0.00268873	0.131526	0.0951706	2.06967	1.35189	2.14831	2.15659	1.99697	3.20736
CGGA_1118	398	1	12.6403	3.0012	5.88329	4.57319	3.74361	0.0487744	3.65236	1.13545	0.233935	0.405618	-0.02705	4.81319	5.87377	6.5438	2.37447	0.397571	6.87124	4.77238	3.46347	5.61281	3.5282	4.14457	5.76812	4.71629	2.123	0.873676	2.2216	2.33515	1.10598	4.26001	3.34909	6.61028	3.39903	3.56328	3.56983	5.43154	0.317886	-0.0157711	0.093942	0.417955	0.0319266	5.23732	2.00665	4.51933	4.76835	5.14554	5.28999
CGGA_1031	2457	1	10.407	2.72661	5.58927	5.2273	4.18233	0.0301116	3.59026	0.470201	0.00472327	0.761505	0.0301918	3.69256	5.90364	5.71763	2.02751	0.0654063	5.5503	4.56209	2.97874	3.63234	3.50302	2.66411	5.63842	8.12458	3.30447	0.526165	4.55579	1.77716	0.808035	3.84657	3.58477	5.89509	3.6963	2.6027	3.58256	5.48733	0.442196	0.197507	-0.000553072	-0.135597	0.170135	3.50685	3.78442	3.57971	4.73161	3.86509	4.4786
CGGA_818	4027	0	8.43716	3.06027	4.66885	5.71099	4.01274	0.194399	3.63264	0.622943	0.408956	1.06009	0.275542	4.58089	5.20032	5.2217	3.80613	0.489903	5.45739	2.85879	4.22675	3.89758	2.78773	3.67761	5.58126	2.82142	3.44409	1.57029	3.45944	3.27628	3.24804	5.92718	3.83748	4.62059	4.03356	3.19373	4.1275	5.13004	-0.000993783	0.334371	0.0838358	1.64318	0.102616	3.79435	2.36567	3.9394	4.58219	3.06502	5.03163
CGGA_252	165	0	11.6928	3.4358	6.5134	5.36026	3.91267	0.00142661	3.80565	0.149051	-0.0330414	0.912418	0.0301918	4.03331	5.96158	7.25286	3.17702	0.180741	6.71075	4.81405	3.51144	3.63368	3.85162	2.64588	5.57864	6.37864	2.52398	0.501763	2.74219	2.53384	1.54343	3.96502	2.60311	6.2846	3.62451	1.58036	3.8435	5.99173	0.554964	0.154098	0.360533	0.480224	0.14349	4.26414	3.96201	4.54317	4.82176	4.13451	4.39541
CGGA_P23	392	1	5.76423	1.77401	3.73786	4.02637	2.80411	-0.00684111	3.42102	0.901941	0.0888399	0.338162	0.0398427	2.24706	3.10677	2.02006	0.843056	0.0224062	2.51909	2.91918	1.3095	2.26322	1.24326	0.804204	2.24018	5.32364	2.45733	0.403613	2.46137	1.9507	0.741367	1.59183	2.0925	3.19993	1.57492	0.928652	3.49397	2.5855	0.0631516	0.00647017	0.355063	0.630531	0.013027	2.08416	1.27662	1.92644	2.22622	1.87323	2.77723
CGGA_1340	1109	1	10.7207	4.31895	5.59372	5.24861	3.99734	0.0939191	3.10115	0.77046	0.250507	0.849834	0.00184609	3.58213	5.76205	5.83234	2.59795	0.439339	7.69863	4.19952	3.37305	3.71627	4.44759	3.28728	4.47696	7.99593	4.03308	3.67697	4.53123	3.35698	2.35024	5.00905	3.24821	5.00854	3.31719	3.92357	3.43252	5.1725	0.600263	0.749264	-0.000553072	0.243433	0.209239	3.10301	3.70514	3.67895	5.10602	3.12147	4.8163
CGGA_P358	1168	0	10.9633	2.39532	5.23696	5.265	4.42492	0.0936718	4.42329	1.73447	0.101269	0.928283	0.08129	5.40271	5.74567	6.65168	2.14753	0.651205	6.57735	4.05634	3.3485	3.41416	2.9739	2.5724	7.36088	9.50435	3.287	2.25422	3.66645	2.50682	2.11629	6.05951	5.36226	6.06196	5.26095	3.31144	3.9576	5.51273	0.208028	0.487813	0.162022	0.117313	0.415053	4.44272	2.88464	4.09621	5.84174	4.39183	5.42906
CGGA_1518	411	1	10.0504	3.31125	5.50852	4.30608	6.69132	0.151707	1.86041	2.16439	0.149839	1.10876	0.0537937	4.36276	5.39935	6.37725	2.28774	0.0224062	6.45651	3.33988	3.21686	3.96666	3.85909	2.92121	7.80978	5.56769	3.29856	2.50996	4.98099	2.05096	2.29064	4.53665	4.96695	5.89151	3.4341	2.73279	2.82494	4.80176	0.997435	0.86569	0.355063	0.402086	0.197742	4.41097	3.4852	5.33333	4.67267	5.59142	4.91134
CGGA_1269	2923	0	10.6741	3.39281	6.25028	5.12934	3.21651	0.0339544	2.79958	0.342429	0.252958	1.40933	0.160713	4.46645	5.86952	6.73548	3.04678	0.259883	5.84384	5.19962	3.74509	4.35229	3.39021	3.17413	6.71515	5.52185	4.29737	2.23836	5.42156	2.28966	1.31884	4.47064	2.88651	5.86832	3.60627	3.23865	3.03172	5.94548	0.340715	0.978384	0.081628	0.279428	0.349977	4.36543	3.74259	4.0708	5.54105	4.48977	5.31817
CGGA_1406	2154	1	10.6598	3.16146	5.28418	5.09771	4.15377	0.00142661	5.76344	0.805194	0.408956	0.776642	-0.0417113	4.60197	5.3852	5.65512	3.30347	0.509641	8.28877	3.96747	3.8134	5.14349	4.0419	4.31348	3.56461	7.44646	3.76731	0.78322	4.44648	3.02033	0.445015	3.5021	5.61063	4.67444	5.39646	3.48826	4.23785	6.77196	0.467257	0.183165	-0.000553072	0.44499	0.14349	4.45892	3.97332	3.21691	5.3227	3.14082	5.27452
CGGA_1421	2699	0	11.5782	1.70204	5.14232	4.2315	4.88845	-0.00684111	1.38912	0.724725	0.137864	0.904111	0.0537937	4.74823	5.19262	6.35013	1.55103	0.420747	5.15853	1.85059	3.11165	3.53971	2.64949	2.28417	8.69389	9.90222	3.5085	1.64629	2.06672	1.87259	3.4485	6.57045	1.68283	7.05218	2.76161	3.27771	4.08429	4.21617	0.208028	0.458502	0.0315332	0.26658	0.584625	4.51945	2.64185	4.03287	4.986	5.4098	4.62347
CGGA_1714	2034	0	11.9503	1.92917	5.43774	4.06019	5.44388	0.0540532	2.60364	1.67892	0.263931	1.08015	0.0676086	4.60776	5.4815	6.59224	1.81196	0.197762	5.02344	4.19713	2.57137	4.34172	2.56734	2.1597	7.86973	7.60554	3.30839	1.84753	3.6832	3.06469	1.67347	4.79232	2.98975	7.00911	4.9214	2.98411	4.0929	4.63021	0.427374	0.268133	0.0980086	1.70943	0.361034	4.47782	3.20357	3.84732	4.77699	4.86914	4.59624
CGGA_1417	2713	0	10.2089	4.0794	6.28322	5.22164	3.2038	-0.00684111	3.1378	0.698734	0.113581	1.57374	0.0537937	4.0085	5.76243	6.74509	4.14744	0.235356	6.17372	5.19218	4.4612	3.9172	3.65559	3.61128	5.51899	5.68282	5.06548	1.54886	6.55035	1.68741	2.34327	4.68412	2.04211	5.22626	3.33715	3.37766	3.62259	6.43104	0.0631516	0.894742	0.0483933	0.863041	0.316277	3.78152	3.86533	3.82358	5.4129	3.61145	5.4131
CGGA_1575	129	1	10.4803	3.10796	6.10487	5.07227	4.48777	-0.00684111	4.61646	2.24538	0.0762921	1.09452	0.283923	4.89212	6.5514	6.91996	2.41755	0.185008	7.10059	5.49229	3.39479	4.03793	4.19037	2.73787	5.83144	6.30912	4.36608	1.56197	2.4735	3.51087	0.453862	4.18589	4.61235	6.00913	8.07528	3.75232	3.77995	5.60836	0.587603	0.00647017	0.146239	0.187044	0.160147	4.49525	4.21061	4.71915	5.80227	4.52312	5.4619
CGGA_893	3160	1	10.165	3.10314	4.97425	5.04917	2.65958	0.0394878	2.36561	0.0812877	0.00472327	1.13106	0.0301918	4.04914	5.47853	6.40135	2.59987	0.168372	5.78384	2.27755	3.7818	3.37034	3.23343	2.7962	6.31256	8.12923	2.91514	2.62354	2.88831	1.8022	2.73661	6.03842	2.46949	5.11829	2.40131	2.42188	3.57267	4.97166	0.336442	0.211723	0.042453	-0.082052	0.156871	4.12731	3.3732	4.42712	4.34969	4.01961	4.73886
CGGA_1329	326	1	10.0093	3.70062	7.85136	5.20829	2.42951	0.0579729	2.43643	1.861	0.233935	1.01686	0.0987801	4.41733	6.13894	8.7804	3.75426	0.0248145	8.00441	2.15528	3.867	3.38408	4.59916	3.08196	6.16041	6.36536	4.55008	0.292083	4.83781	3.35698	0.387713	3.67866	1.62322	5.90041	2.93523	3.55759	4.22043	4.73732	0.081239	-0.0157711	-0.000553072	-0.108562	0.00269431	3.91724	1.1194	4.28142	6.48361	4.2099	4.87135
CGGA_1356	948	1	10.1649	2.89769	5.8652	5.52696	3.58576	0.0136576	2.86438	0.733283	0.137864	0.959917	0.0537937	4.81864	5.80896	6.67295	2.27013	0.943325	5.87926	2.91518	3.43673	3.18403	3.04419	2.85732	6.85177	8.93211	3.55971	3.04063	4.03711	1.33774	3.82762	7.09938	2.93475	5.34316	3.69243	3.34836	3.91199	5.38059	0.262449	0.820924	0.297928	0.253619	0.744388	4.45172	3.08481	4.5459	5.45655	4.731	5.49947
CGGA_632	576	1	10.5404	3.53417	6.33107	3.96529	2.31513	0.00142661	2.72585	1.17629	0.148913	1.44263	-0.02705	6.06445	6.50735	5.10074	2.63978	0.130617	5.80024	5.6265	2.15417	3.54325	3.44786	1.81719	3.89773	3.67259	3.75503	1.34539	2.96449	3.90982	0.817072	5.13656	2.71441	5.02181	3.98113	1.6727	3.45542	5.21755	0.125846	-0.0157711	0.123713	0.158079	0.500768	4.6638	2.58257	5.07796	3.40345	4.71286	4.82246
CGGA_1281	2909	0	7.93658	1.98414	5.05502	4.64472	3.21806	0.00142661	1.1138	0.404501	0.0233367	0.344479	-0.0417113	3.74722	4.12342	6.05215	1.67213	0.376223	4.71073	1.47329	4.06	2.20538	1.8079	3.24774	7.13468	6.26877	3.10567	3.11349	3.90952	0.415257	3.89233	7.25343	2.22094	4.61353	2.38357	3.13798	3.45086	4.46245	0.081239	0.555001	0.052946	0.0312577	0.735854	3.37111	2.78254	4.46261	3.51791	3.48913	4.29704
CGGA_1431	2048	1	11.783	2.22795	5.11201	5.17481	5.43372	0.0936718	2.74552	1.20697	0.101269	1.23763	0.0537937	4.06746	5.73321	6.34268	1.81196	0.159155	5.76821	2.96436	2.39044	3.77098	3.02251	2.29075	7.24404	7.12773	2.87608	1.70629	2.43368	2.68758	1.73936	4.3978	3.59956	6.55556	4.20147	2.9272	3.81011	4.77263	0.543459	0.137302	-0.00268873	0.354243	0.316277	4.54905	3.16153	4.05902	5.00349	4.72845	5.08672
CGGA_P144	1559	0	9.73773	3.98259	6.10132	5.88918	3.64879	0.0936718	4.56924	0.342429	0.196674	1.43802	0.0537937	4.26371	5.50554	6.28831	3.40749	0.45299	6.39876	3.85689	4.01096	3.80036	3.61351	3.42686	5.76366	6.43811	4.51973	2.07488	5.45003	1.99012	3.20824	5.47056	3.7808	5.42063	3.80308	2.91966	4.15913	5.80858	0.194125	0.301752	0.541351	0.214037	0.3276	4.22601	3.57391	4.37976	5.19036	4.12681	5.3773
CGGA_P604	262	1	10.9059	3.83064	6.20358	4.4162	2.14564	-0.00684111	3.26943	3.58404	0.0248644	0.121539	0.0537937	4.48218	7.47217	6.95861	3.51315	0.0366828	6.55666	6.18176	2.61097	3.02767	4.42459	3.65068	6.53787	3.78015	4.36307	1.38594	5.8263	2.75871	0.242045	4.2281	2.87372	6.11247	4.34893	3.28339	5.0244	5.89138	0.00125961	0.0734439	-0.00268873	0.0738302	0.054697	3.94469	3.92119	4.51766	5.92762	4.90577	5.06768
CGGA_1006	254	1	13.5048	3.05462	4.76213	4.71292	4.17345	0.102701	3.137	1.91137	0.347102	1.6172	0.586019	6.42922	6.8479	6.01156	3.11582	-0.00289617	6.24155	6.03136	2.46673	3.49641	4.75694	1.11035	7.99951	1.90726	6.45608	3.4578	3.40301	4.10503	1.36516	3.20544	3.83607	8.87686	4.57044	2.38835	4.40303	3.35519	0.883274	0.543497	0.31215	0.0432862	0.468622	4.75836	2.04114	4.23097	6.65674	5.5056	5.35955
CGGA_892	448	0	11.025	2.90257	5.83357	4.97032	3.6391	0.120031	2.2342	0.491481	0.4541	0.871026	0.0160864	3.60288	4.48786	6.86907	3.26267	0.155897	4.38841	4.09231	2.9424	3.05879	2.27845	2.57138	5.70222	8.26525	3.83242	0.986937	5.07584	1.66505	1.43504	3.90666	1.98462	5.95953	2.51419	2.97953	3.20444	5.73566	0.399244	0.423758	0.21749	2.3376	-0.0271169	4.38389	3.54073	4.29671	4.44553	3.87413	4.53142
CGGA_1339	2832	0	11.0202	2.92238	5.94503	5.74264	2.92697	-0.00684111	2.66327	0.716114	0.0762921	1.07292	0.0676086	4.19677	5.55965	6.42651	3.39253	0.319426	6.08161	5.33938	3.66569	3.84565	3.51145	2.97244	5.89133	8.91159	3.43907	1.17826	5.99222	1.89773	1.26297	4.28571	2.93826	5.76033	3.4938	3.10557	3.61594	5.95924	0.194125	1.06993	0.0483933	0.366351	0.270052	3.62164	3.71122	3.36398	5.83167	4.19975	5.3773
CGGA_1619	766	1	11.0222	2.63835	5.67236	4.62598	4.70281	0.132543	2.02067	0.531823	0.173465	1.28873	0.0537937	4.88284	5.86952	6.69136	1.97723	0.210403	6.5903	3.96537	2.74897	3.70481	2.95728	2.18486	6.65322	5.88955	3.41663	1.1609	3.94654	2.70396	2.07292	4.62032	3.46738	6.30122	4.57497	2.68825	2.9524	4.91095	0.22181	0.174237	-0.00268873	0.342035	0.382891	4.42936	3.61437	4.34879	4.78295	4.61543	4.94866
CGGA_633	1812	1	8.6815	2.7418	5.3588	3.63396	4.49856	0.0394878	1.52445	0.998332	0.718175	2.25408	1.06167	4.67979	4.76741	4.97173	3.48596	0.180741	3.81002	4.10993	2.10543	3.85141	2.05859	3.22331	4.84302	4.28058	4.81028	2.76668	4.33512	2.68809	2.86546	4.63547	2.46949	3.7265	1.75541	2.47281	3.84108	4.1655	0.733496	0.857491	0.352616	1.3688	0.500768	4.02053	3.62333	4.82104	3.87633	3.77854	4.03647
CGGA_1012	3679	1	10.6091	2.69069	5.80496	5.70041	3.97264	-0.00684111	4.00717	3.48369	0.73598	1.3977	0.173528	4.66972	6.13043	6.17463	2.14753	0.106009	6.98531	4.77648	2.81283	3.88379	3.94365	2.59331	5.81428	8.84841	3.63244	1.32014	3.1678	3.38696	0.798675	4.17256	3.79377	6.04443	5.46542	3.26913	3.7072	5.52509	0.262449	0.033653	0.0650905	0.159547	0.0683177	4.24112	3.67485	3.9152	5.93886	4.2589	5.1823
CGGA_279	1314	1	11.4578	3.20957	5.42161	4.31444	4.01418	-0.00684111	2.7755	2.85737	0.0888399	1.36822	0.0398427	4.69201	6.63084	6.8658	2.42702	0.0366828	5.8395	5.2344	2.77214	4.08955	3.71276	2.45667	7.46602	7.58231	3.16749	2.24367	2.9931	2.63968	1.43925	4.79623	2.57437	6.94158	6.31941	3.62889	3.91466	4.8502	1.0632	0.0993445	0.0650905	0.342035	0.210054	4.31402	3.60103	4.45383	5.46225	5.7225	5.08055
CGGA_1745	1929	0	5.20166	1.68607	3.39261	4.60332	1.57417	-0.00684111	1.62616	1.11245	0.0508303	0.265239	0.0257529	1.94914	2.48609	2.5422	1.02043	0.354001	3.23347	1.84177	1.43766	1.37929	1.02024	0.904153	2.63769	4.8702	2.43276	0.669184	3.54749	0.559129	1.36723	2.91383	1.0244	2.73499	0.7295	2.65378	3.33139	3.25415	0.180097	0.301752	-0.00268873	0.159547	0.17279	2.16099	1.44779	2.64487	1.98011	1.63718	2.78524
CGGA_903	1455	1	9.31462	3.56915	6.06402	5.68499	2.98578	0.0339544	4.90375	0.672253	0.0508303	1.21801	0.108262	3.84511	6.25461	6.42324	3.67549	0.575173	6.9904	5.07705	3.44906	4.9136	4.77887	3.92977	4.44893	7.35232	4.71851	0.472571	4.10901	3.75735	1.14387	4.52407	3.61018	5.13414	5.13618	3.67763	4.16875	6.57759	0.137252	0.397933	0.615426	1.60413	0.197742	3.98771	3.70093	3.27358	5.86491	3.76129	5.69335
CGGA_1005	3815	0	8.68092	3.13795	5.64126	4.47475	2.20323	0.00142661	2.57287	0.213904	0.00472327	1.4057	0.379004	4.00502	5.68455	6.36754	2.58639	0.143312	5.45862	4.29174	3.37602	3.59172	3.33855	2.85934	5.93957	6.67087	2.63166	1.86615	3.18401	1.31954	3.37519	6.11874	2.4725	5.2292	2.49048	2.82035	3.30496	5.33142	0.336442	0.472716	0.0318586	-0.135597	0.284526	3.76354	2.78254	4.1441	3.73578	3.5575	4.52474
CGGA_835	517	0	9.91786	2.55479	5.86345	5.35677	4.05263	0.0487744	3.05938	0.593605	-0.0330414	0.925933	-0.0417113	3.86203	4.69939	6.58538	1.86474	0.397571	4.716	4.83078	2.57883	4.22439	2.45722	2.68894	5.57864	8.15037	2.32311	0.986937	4.72993	2.37253	1.51994	4.77123	2.18952	5.5338	3.36069	3.35991	3.09207	5.66129	0.14755	0.472716	-0.000553072	1.03087	0.102616	4.12086	3.5936	3.03808	5.47898	4.5948	4.78889
CGGA_1185	731	1	10.1906	3.09377	5.58092	5.29969	5.04885	0.0540532	2.79958	1.40559	0.149839	0.98321	0.0948405	4.30559	5.57117	6.46049	2.69362	0.0366828	7.35668	4.00447	2.98357	3.11157	2.96562	2.7192	6.81513	6.19637	2.66319	1.2067	4.90711	2.56716	1.21066	4.09712	4.01741	5.97807	4.04647	3.47885	2.85454	5.44272	0.84787	0.00647017	0.0315332	1.04108	0.134515	3.98078	2.99774	3.79759	5.35931	4.49283	5.03899
CGGA_P151	1582	0	11.0731	2.41668	5.44108	5.22274	4.22894	0.132543	2.7701	0.237232	0.0762921	1.28873	0.186228	4.66471	5.90613	6.54763	1.79677	0.283997	6.26895	3.34427	3.02201	3.09281	3.13476	2.78788	7.50636	7.77425	3.26695	2.65668	3.98843	1.55576	2.989	6.14323	3.46266	5.86794	3.70025	3.07419	3.39957	4.89193	0.327937	0.668692	0.396707	0.227349	0.160147	4.57653	3.25901	3.93896	5.29482	4.58541	4.94498
CGGA_1383	884	0	12.9822	2.14091	6.1765	4.58086	3.60181	0.132543	1.67386	1.99742	0.0248644	1.20478	0.0257529	4.02598	5.4117	7.23964	1.89011	0.0224062	5.62095	4.44249	2.93385	3.79735	2.62268	2.32951	7.38055	6.94752	2.69425	1.92978	3.54749	1.39851	0.741367	4.28932	1.61858	7.12929	3.39449	2.99839	2.98292	5.07369	0.463105	0.563048	0.162022	0.131526	0.0951706	4.46692	3.30365	3.92672	5.08161	5.30896	5.1002
CGGA_641	3411	1	11.3867	3.82502	6.73306	3.64389	2.07121	0.0761125	1.33008	0.944505	0.0960748	0.761505	0.00184609	4.11614	5.13702	6.54493	3.00318	0.168372	3.20383	5.36429	2.94972	3.91737	2.10539	2.49913	5.76729	6.30696	2.33563	1.65098	4.31765	1.30497	1.95466	5.08272	1.71715	6.19311	2.4323	3.11986	3.27154	5.56816	0.467257	1.21498	-0.000553072	2.01443	0.183283	4.12301	4.25389	4.38251	4.10494	5.56279	5.0125
CGGA_P29	103	1	7.20529	1.95112	4.31722	4.20453	1.56964	-0.00684111	2.61275	1.02507	0.161705	0.936255	0.0676086	2.45792	3.95284	2.90198	1.11807	0.17214	3.32128	3.6742	1.04282	2.54955	1.76713	0.814555	3.2042	5.67545	3.12708	2.13634	2.66524	1.46242	1.31884	1.92745	1.30167	3.76464	2.09282	1.84421	3.26103	4.2869	0.0932105	0.0603081	0.114236	0.0738302	0.013027	2.37203	1.88992	2.90205	2.54062	2.82007	3.20547
CGGA_1863	1594	0	11.8917	2.51841	5.98096	4.61112	3.34293	0.0136576	0.813771	0.847936	0.0379116	0.920269	0.0257529	4.65159	5.71822	6.95316	2.02941	0.106009	5.5214	4.63784	2.81727	3.70804	2.81603	2.65161	7.49363	6.46976	2.69425	2.23037	3.46021	1.19391	1.8623	5.11971	1.80684	6.56906	2.94382	3.10394	3.10663	5.05602	0.989018	1.03144	-0.00268873	0.214037	0.304862	4.48348	3.31352	3.92591	5.31038	4.89764	5.10102
CGGA_1322	253	1	10.295	3.15966	5.81147	5.01698	3.25916	0.102701	2.49667	0.393268	0.347102	0.835516	-0.02705	3.67404	6.07156	7.08157	2.09303	-0.0454878	7.75087	4.66889	2.04427	3.67475	4.04485	3.04989	7.14727	6.72636	3.27649	1.57664	2.25011	1.80574	0.399332	3.70452	1.67549	6.99753	3.2358	3.2331	2.81867	5.39951	0.18983	-0.0157711	-0.000553072	-0.017945	-0.0271169	4.85916	3.70156	4.35429	5.45471	5.77607	5.23006
CGGA_P174	1482	0	9.92087	4.14924	6.37178	5.45364	3.73198	0.0339544	3.56573	0.450776	0.185121	1.16438	0.08129	4.35127	5.50776	6.67447	3.65964	0.307713	5.6874	4.90685	3.78567	4.12366	3.5543	3.59707	5.59293	8.35948	5.68418	1.67462	5.43974	1.98233	1.95118	5.02124	2.81169	5.54015	4.23686	3.28339	3.90034	6.16767	0.137252	0.279431	0.0315332	0.117313	0.185321	4.06806	3.86442	4.02909	5.49177	3.73829	5.25748
CGGA_D40	3557	0	10.8376	2.31222	5.67155	4.72695	4.65806	0.137057	1.68351	0.912863	0.49823	1.82365	0.614729	3.64526	5.09331	5.68224	1.60036	0.104886	3.68781	5.33848	2.37731	3.07668	2.29189	2.6573	6.64482	6.29825	3.14561	2.66296	6.32166	0.962645	1.91781	4.03966	2.37351	5.98028	3.3597	2.45794	3.72317	5.10593	0.45896	0.622364	0.691645	0.333481	0.379386	3.86906	3.57861	4.70192	4.45953	4.19722	3.92083
CGGA_330	1121	1	8.09668	2.77615	4.92314	5.3062	5.26513	0.0939191	5.41746	0.967809	-0.0521997	0.48298	0.177119	3.72215	5.22185	4.61355	2.26618	0.785361	7.24566	4.27592	3.36109	4.90066	3.64509	2.89433	4.50603	6.30955	4.60676	0.698351	3.36106	2.71007	1.06764	2.96492	4.39946	4.66255	5.49729	3.29098	4.06902	5.66473	0.21043	0.139367	0.180936	-0.0432277	0.00269431	3.24376	3.70514	2.76283	4.63486	2.91682	4.96127
CGGA_1718	1996	0	12.0032	2.41061	5.49551	5.27103	4.59544	0.0339544	3.05829	0.799937	0.113581	1.22457	0.0948405	4.4723	6.15024	6.49268	1.93668	0.0508186	6.381	4.67276	2.78357	4.30678	3.28268	2.69546	7.1101	6.74667	3.07966	1.78613	2.67313	2.83275	1.85124	4.17649	4.21364	6.27978	4.50671	3.1473	3.18527	5.07843	0.875315	0.387572	0.162022	0.253619	0.210054	4.69202	3.41076	4.02984	5.30133	4.55513	5.17392
CGGA_1311	1080	1	9.77388	3.02982	5.81069	5.74482	2.61898	-0.00684111	2.06586	1.46263	0.125779	0.829155	0.248072	3.01354	5.73853	6.82519	2.61155	0.295904	6.86144	3.82759	3.70768	3.04738	3.93289	2.64913	5.86076	5.86071	2.98166	0.947164	3.30324	1.05647	2.40632	5.01382	1.6465	5.06723	2.78385	3.33072	2.47636	5.92964	0.22181	0.0470452	0.0315332	0.459782	0.575195	4.00603	2.88858	3.14229	5.58559	3.59908	4.89609
CGGA_P461	599	1	10.6366	3.39985	6.02538	4.97142	3.07915	-0.00684111	4.35494	1.3626	0.408624	0.785829	0.0398427	4.97269	6.80108	6.85095	2.69105	0.210403	6.54815	6.13703	3.82094	3.83788	4.18714	3.14911	6.95575	6.50575	3.06998	2.54229	4.54547	2.58501	1.65649	5.48128	3.62596	5.59825	4.91861	3.00547	4.20011	5.85962	0.0782527	0.438608	-0.00268873	0.26658	0.338833	4.02854	3.72244	4.33392	5.67943	4.26503	5.40615
CGGA_1514	76	1	6.32396	2.22092	3.83871	2.48942	2.17435	-0.00684111	2.43575	2.38669	0.0248644	0.82059	0.0257529	3.48696	3.96964	2.39016	0.94455	0.119482	2.90945	3.82555	1.79962	2.19694	1.5189	0.951363	3.80315	6.7961	3.31815	1.47677	2.55278	1.79877	1.52659	1.85947	1.93893	4.04126	3.0373	1.43724	2.74269	3.26407	0.315055	0.00647017	-0.00268873	0.425437	0.013027	2.22046	1.42292	3.08549	2.75752	2.37872	3.83839
CGGA_D58	181	1	9.35303	0.92455	4.31169	5.05895	3.251	0.0110828	1.54143	0.522849	0.00472327	0.730703	0.00184609	4.1396	4.72654	4.86181	1.39638	0.168372	4.99968	2.09926	2.23296	2.76052	2.32951	1.92189	6.77129	9.28313	2.36038	2.41821	3.13417	1.86139	2.65782	6.17185	3.09505	5.0271	3.89147	2.49054	3.40619	4.61989	0.0110999	0.32119	-0.000553072	1.76042	0.296715	2.96238	2.20372	3.69082	4.43266	3.46593	4.42696
CGGA_1786	1817	0	11.9182	2.51281	5.99608	5.03144	2.77949	-0.00684111	1.12178	1.29554	0.063623	0.862934	0.0398427	4.32928	5.07801	7.09085	2.53852	0.0224062	6.15242	4.36508	2.7606	3.69833	2.87751	2.62658	6.92081	4.88874	2.17429	0.870231	4.05001	1.70182	1.19277	4.29507	1.6044	6.52234	3.67402	3.1754	3.1606	5.39282	0.439375	1.86407	0.177661	0.200602	0.197742	4.35634	3.38449	3.27086	5.58996	4.58541	4.94406
CGGA_J130	3116	0	7.79224	2.3356	5.17841	4.04235	3.05735	0.0939191	3.30171	0.734909	0.250507	0.547153	-0.02705	4.62096	4.80395	6.07357	1.53577	0.408127	3.95954	2.35526	4.1399	2.24662	2.01075	3.55161	7.07215	8.16242	2.89007	2.96692	3.51477	1.11312	3.97028	7.69412	3.06279	3.79175	3.29441	2.92598	4.08698	4.53398	0.21043	0.904403	0.13346	0.0552097	1.00123	3.39498	2.31384	5.15878	3.48512	3.11661	4.61714
CGGA_1463	2633	0	10.2878	3.38857	5.85827	5.57672	3.28547	0.0540532	2.38339	0.481718	0.185121	0.608688	0.0398427	3.9001	5.40623	6.60734	3.61852	0.376596	5.83464	4.6804	3.65759	3.59474	3.55956	3.39246	5.7127	8.33264	4.57576	1.0892	6.24151	1.62819	1.50766	4.62923	2.00037	5.49356	3.13666	3.2518	3.60703	6.08601	0.249019	0.448591	0.0483933	0.317311	0.121522	3.77331	3.66106	3.57918	5.65973	3.71676	5.17774
CGGA_1606	471	1	11.0968	3.9131	8.08659	5.80054	2.35919	0.113199	3.9693	1.14467	0.0379116	0.785829	0.0537937	4.29692	6.55929	6.5393	3.9019	0.106009	6.91502	4.66563	3.34997	4.26316	4.7804	3.99867	5.38455	4.9144	4.94181	2.86539	5.10457	3.5456	1.80987	3.797	1.79041	5.29692	3.58531	3.53358	3.7878	6.24777	0.302067	0.00647017	0.146239	0.737387	0.013027	4.26283	4.89804	4.0998	5.41497	4.33756	5.74831
CGGA_P84	1694	0	10.0208	4.10391	5.41517	5.83033	3.81649	0.170694	4.07785	0.296642	0.196674	1.77268	0.0676086	4.04159	5.94512	6.27994	3.29416	0.283997	6.71809	3.14665	3.86124	4.12913	4.15693	3.52236	5.24463	6.98812	4.14245	1.60898	4.8706	2.22881	1.35662	4.35055	3.4709	5.61224	3.89341	3.37106	4.20514	5.92552	0.762549	0.660192	0.268637	0.187044	0.281751	4.25913	4.15491	4.30059	5.56797	4.02522	5.49535
CGGA_601	1133	1	8.46315	2.70473	4.83084	4.9844	4.4078	0.0394878	2.65731	0.42672	0.527109	1.94116	0.842766	3.86334	5.08929	6.20204	2.65291	0.649646	5.41085	2.17173	4.08026	2.42838	3.11832	3.2057	6.27517	6.63759	3.58262	2.77881	3.18401	1.79865	3.42873	6.45076	3.16199	4.70004	2.38951	3.1582	4.02491	5.09726	0.50791	0.913625	0.31215	0.666865	0.603216	3.59284	2.33531	4.20595	3.73719	3.0022	4.48826
CGGA_1146	2498	0	9.79665	3.2618	5.07989	5.74549	4.87212	0.348527	3.83879	1.11461	0.512723	2.12192	0.697679	3.37181	5.91006	6.65112	2.68994	0.155897	7.84159	3.63521	2.56129	4.18842	3.75592	2.42693	3.99052	7.6286	3.53303	2.32901	4.2759	3.17357	1.75657	3.47613	3.8403	5.9751	4.08712	3.67074	4.26366	6.20896	0.859558	0.32119	0.113879	1.91173	0.320802	4.77089	3.99098	3.59923	5.58674	4.03659	5.30539
CGGA_720	1258	1	12.4812	2.90804	6.27498	5.63255	4.07927	-0.00684111	2.10534	1.69625	0.0762921	1.34421	0.147782	3.94844	6.4149	6.74078	1.99486	0.17214	6.19101	5.43118	2.69892	3.99891	3.66771	2.59331	6.42611	6.93773	2.83745	1.7102	3.34781	1.99012	1.83259	5.19447	3.0714	6.37701	2.97208	3.1362	3.3812	4.92222	0.22181	0.366615	0.130311	0.159547	0.304862	4.40933	2.94434	4.69313	5.32923	5.38281	5.17888
CGGA_P310	224	1	12.6389	1.39245	4.57164	2.71681	5.01639	-0.00684111	2.257	0.561052	0.0248644	0.722983	0.186228	5.17273	6.2081	5.47196	1.50094	0.0224062	3.82746	2.71241	1.70906	4.72037	2.28397	1.61706	8.58448	6.25398	2.2578	0.993969	0.794311	2.56201	1.22832	3.73454	1.45895	6.88074	1.92075	2.00928	4.57417	2.84675	0.032509	0.0603081	0.0980086	0.482241	0.134515	4.28235	1.97381	3.52669	2.98757	4.99982	3.4124
CGGA_P3	2126	0	6.78461	1.35833	3.42745	2.39185	1.13682	-0.00684111	0.580629	0.716114	0.063623	0.265239	0.0257529	1.68453	2.2241	2.87431	0.800146	0.0224062	1.90039	2.64319	1.26625	1.89218	0.902705	0.614183	1.48941	1.5996	2.26132	0.173171	0.833494	1.01009	0.514446	1.12227	0.554401	3.22596	0.634945	0.64542	2.08694	2.67346	0.0631516	0.00647017	0.355063	0.0738302	0.013027	1.49489	1.01076	1.62015	1.73886	1.6224	2.80375
CGGA_2129	828	0	10.9231	3.10442	5.84986	5.08217	2.05857	-0.00684111	2.7233	1.01812	0.63293	0.628354	0.0537937	4.60461	6.65583	6.74928	2.524	0.0924094	7.42985	4.54127	3.31417	3.77814	4.39881	2.90502	5.94429	6.12686	2.76165	0.372966	1.03147	2.35695	0.443497	3.88737	2.4717	5.7813	4.78639	3.24305	2.72776	5.88013	0.315055	0.210205	-0.00268873	0.329725	0.517253	3.89929	3.61105	3.8377	5.54637	4.53157	4.86354
CGGA_1617	2310	0	11.8638	1.86097	5.29172	3.76006	4.75563	0.0136576	1.53862	1.26664	0.252958	0.952071	0.318888	4.3442	4.89184	5.99101	1.52623	0.119482	4.31011	3.63709	2.39659	3.03127	2.49166	2.13033	8.63218	7.80235	1.9244	2.60068	3.29652	1.73956	2.51749	5.28947	1.29569	6.95205	2.40791	2.81333	3.67463	4.04787	0.427374	0.805672	0.0315332	0.240543	0.185321	4.82868	2.74727	4.20969	4.57928	5.57069	4.0434
CGGA_909	3920	0	9.11503	3.16326	5.74667	5.23219	4.19647	0.111405	1.99575	1.38306	0.569646	1.77497	0.688687	4.00502	4.8278	6.37662	3.1291	0.489903	4.12764	3.82657	2.93322	3.62024	2.32511	3.00768	5.53197	7.82127	4.40577	2.38389	4.84594	1.49752	2.05628	4.20415	3.06496	5.15232	4.37044	3.07861	3.77181	5.58174	1.07816	0.931914	0.643963	1.80727	0.356226	4.25794	4.08988	3.77047	4.67253	4.00766	4.11547
CGGA_752	3680	0	9.72395	2.50974	5.67272	5.43201	4.11571	0.00142661	3.33306	0.053308	0.0960748	0.49234	-0.02705	3.98138	4.87818	6.10081	2.06809	0.264469	4.65001	4.10993	3.05132	3.76445	2.41549	2.77258	5.90883	7.78415	2.36651	1.57664	4.97755	2.3676	2.51112	5.0845	2.95781	5.86907	3.5602	2.99633	3.87113	5.89744	0.433726	0.197507	-0.000553072	1.54713	0.367851	3.4734	3.41763	3.53831	5.15891	3.62804	5.09085
CGGA_1553	540	1	10.5599	4.1152	5.9777	5.66474	2.86368	0.0540532	3.12731	0.645266	0.101269	1.06564	0.0398427	4.45291	5.90683	6.60291	2.92578	0.45299	6.05522	4.39093	4.10635	3.21412	3.72781	3.20676	6.66495	9.0396	4.28784	2.93435	4.35444	1.78982	3.05794	6.53778	3.28873	5.29235	3.56975	3.19684	4.2073	5.58512	0.390816	0.478112	-0.00268873	0.200602	0.436094	4.01658	3.42882	4.20772	5.59329	4.47015	5.58867
CGGA_485	2437	0	8.56643	2.74828	5.10697	6.44776	3.6482	0.00142661	2.8975	0.880544	0.166214	0.547153	-0.0417113	3.39131	4.07023	6.49907	3.07244	0.217222	4.62135	3.1834	3.0824	3.09616	2.45928	3.29748	5.05013	8.53161	3.4631	0.278033	5.32883	2.06304	0.971885	4.12594	2.25183	5.00232	3.19497	3.34545	3.53398	6.1085	0.442196	-0.0157711	-0.000553072	0.983589	-0.0271169	2.91423	3.83254	2.69074	5.38468	2.58263	4.80483
CGGA_273	2635	1	12.5405	3.02616	5.54731	5.1686	4.22099	0.120031	3.76112	0.543405	0.408956	1.67573	0.92194	3.24776	5.9204	7.3954	2.74243	0.0918458	6.68855	3.28584	3.85875	3.73416	3.58623	2.78764	5.92621	5.77147	3.92153	2.33299	3.35274	2.24159	1.57232	3.9722	3.52027	5.78621	3.78916	2.13291	3.64888	5.57996	0.399244	0.373282	0.303874	0.169044	0.500768	4.7114	4.08679	3.73434	4.85135	4.01791	4.3224
CGGA_551	4363	0	8.71065	2.73747	5.59331	4.66363	2.65958	0.0206438	2.20034	0.324056	0.0417754	0.791608	0.00184609	3.32566	4.01053	5.95996	2.70637	0.343598	4.03353	4.11779	3.16308	2.8664	2.29189	3.02505	5.44757	8.32706	3.24922	2.14781	5.30738	0.602034	2.6933	5.96903	2.03902	4.78417	2.06974	2.94559	3.54554	5.16068	0.381629	0.472716	0.208465	-0.0952427	0.209239	3.47857	3.23082	4.01326	4.55501	3.18144	4.46017
CGGA_1145	239	1	10.6041	2.72225	4.65599	5.24436	5.01079	0.0670851	4.7172	3.10036	-0.0715466	0.344479	-0.0125318	4.62286	6.09966	4.91805	1.56185	0.205164	7.56671	4.37699	2.95884	3.98902	3.45823	1.80037	6.63973	4.89656	4.8741	1.09281	2.19254	3.12414	0.666249	3.95369	5.75227	4.86421	4.74421	3.31837	4.18703	4.75336	0.14755	0.168696	-0.000553072	-0.108562	0.156871	4.01831	3.92122	2.92691	5.20051	3.50588	4.28481
CGGA_P633	676	0	10.7231	3.6327	6.23544	5.80517	3.24775	-0.00684111	5.31346	1.43699	0.263931	0.548086	0.211291	4.29625	6.17884	6.46877	4.22613	0.159155	6.74917	4.84757	4.04842	3.48099	4.56628	3.86183	5.5793	7.49064	3.72818	2.0568	4.20689	2.00558	1.71093	5.33061	2.18177	5.44704	4.65297	3.46541	4.13363	6.37364	0.0631516	0.279431	0.146239	0.17336	0.23436	3.55468	3.65893	3.74587	5.77876	3.94585	5.15619
CGGA_1621	2311	0	11.4083	2.47868	5.90667	5.202	5.112	0.0339544	3.03376	0.471479	0.113581	1.32594	0.08129	4.26028	6.05487	6.67015	1.93668	0.0508186	6.42685	4.47707	2.58471	3.4262	3.31953	2.1955	6.81529	7.02236	3.72698	1.07688	1.8208	2.50414	0.749703	4.12521	3.16764	6.59606	4.77778	2.90637	3.41642	5.04927	0.262449	0.256741	0.177661	0.131526	0.258255	4.67585	3.71224	4.17499	5.47104	4.72633	5.11474
CGGA_630	4300	0	9.84306	2.56417	5.74894	4.6674	3.52931	0.00142661	2.70677	0.213904	0.0233367	1.45621	-0.0125318	3.69681	4.79986	6.86354	2.64166	0.376223	4.02555	4.32913	3.6188	3.54605	2.40281	2.98822	6.20491	8.33901	3.65712	1.88198	4.42056	1.07401	2.64282	5.99381	2.22785	5.54499	3.09766	3.03664	3.57125	5.3144	0.51588	0.307903	-0.000553072	-0.0689875	0.183283	4.11441	3.50422	4.34811	4.64931	3.76539	4.92984
CGGA_1169	1765	1	10.7461	2.90391	5.60952	5.55152	3.98035	0.226628	3.94347	0.225043	0.274813	1.2634	0.0676086	4.18002	6.32248	6.298	2.28072	0.259883	6.54757	2.7716	3.27113	3.82615	3.55166	2.66394	6.49557	8.12653	3.1102	0.803915	4.31161	2.42966	0.999577	4.28137	4.16425	5.98053	4.25645	2.97148	3.00405	5.6229	0.180097	0.23367	0.177661	0.0738302	0.0270543	4.13941	2.95184	3.92509	5.18823	4.62881	4.92406
CGGA_616	952	1	9.05748	2.59206	5.09272	4.69212	4.61782	0.248541	3.91485	2.58597	0.0781413	1.43807	0.202342	4.58185	5.28681	4.68043	3.25026	-0.00289617	6.65805	4.91042	2.9424	4.53076	3.42303	2.40913	4.72202	4.41151	4.02412	3.42566	1.56943	2.98413	1.18733	2.64939	4.33954	5.60983	6.27481	3.08092	3.30661	3.84494	0.753259	0.197507	0.123713	0.381055	0.0747375	3.74445	2.22613	4.16447	4.42914	4.53294	5.88729
CGGA_843	4005	0	10.8533	3.25144	6.01389	4.37677	2.32768	0.00142661	1.81313	0.707686	0.148913	0.991513	-0.0565184	3.74584	4.57646	7.18172	3.47858	0.155897	3.70866	3.97792	3.47769	3.41427	2.46958	2.70904	5.42476	8.41212	3.70317	1.35995	5.34249	1.43594	1.72026	4.22415	1.50363	5.27751	2.42846	2.47281	4.73614	5.73064	0.289509	0.334371	0.0211608	0.274114	0.468622	3.93769	3.54645	4.10138	4.28202	3.8939	4.52665
CGGA_1309	964	0	12.8064	1.67532	5.55197	3.95989	4.87524	-0.00684111	1.30801	0.77531	0.0888399	1.10166	0.0537937	3.63213	5.42326	6.49723	1.422	0.119482	3.64528	4.23772	2.55519	5.19539	2.44279	1.88118	7.92935	5.41174	2.44817	0.618291	2.8199	1.32526	1.21657	4.05813	0.76619	7.56063	2.86721	2.8256	3.62149	4.20021	0.137252	1.79123	0.0145069	0.482241	0.160147	4.15494	2.72061	3.5278	4.20405	5.0915	4.59808
CGGA_1554	824	1	10.5792	3.19483	6.17873	5.25537	2.91584	-0.00684111	2.49614	2.07518	0.447192	1.62476	0.248072	4.97742	5.90497	6.6303	2.43016	0.132828	5.80081	6.31423	3.18552	4.27647	3.41539	2.80999	6.34408	6.3459	3.3815	2.68577	4.06865	2.38063	1.40372	4.58462	3.88725	5.8194	5.69043	3.21642	3.31484	5.69466	0.288971	0.23367	0.130311	0.26658	0.527076	4.39173	3.66319	5.39382	5.7285	4.66409	5.4841
CGGA_P314	1238	0	12.6817	2.14839	6.09736	4.44382	2.76879	0.132543	1.46584	3.27972	0.0379116	1.32594	0.108262	4.31815	5.45865	7.14927	2.3392	0.0366828	4.71206	4.7206	2.63416	4.29034	2.84143	2.42456	7.58948	5.8699	2.91581	1.93642	3.35914	1.36846	1.1807	3.45099	1.42677	7.05025	4.61691	2.95505	3.35585	4.77444	0.315055	0.790248	0.0145069	0.62042	0.185321	4.57127	2.63225	3.42213	5.20378	5.27117	4.85762
CGGA_P13	1938	0	9.98292	3.41796	6.06849	5.36663	2.82142	0.0136576	1.8449	0.450776	0.113581	1.06564	0.0398427	4.08732	5.35194	6.43886	3.05654	0.342568	5.81105	4.58284	3.74401	3.91445	3.33678	3.59111	5.84926	7.50251	4.32713	2.68385	5.26111	0.751694	2.84861	5.53914	1.73124	5.40206	2.72378	3.41144	3.73291	5.67975	0.378439	0.268133	0.081628	0.253619	0.349977	4.28597	3.85805	4.58295	5.42057	4.15915	5.34176
CGGA_1696	1205	0	6.00927	1.46448	3.56383	3.90341	2.90622	0.151707	3.36872	1.21305	0.0248644	0.00760713	0.0398427	2.75789	3.50186	2.30422	1.03874	0.0224062	3.04643	2.65052	1.77013	1.785	1.13656	0.884774	2.8181	2.14033	1.91538	0.0995491	2.47048	1.116	0.357616	1.93626	1.77377	3.53498	2.61774	0.824787	3.35854	3.36103	0.0782527	0.00647017	0.19316	0.145603	0.108408	1.77449	1.50202	2.24494	2.09168	2.12306	2.90449
CGGA_165	183	0	12.6405	1.47083	4.86207	3.09626	5.11258	0.0739577	1.91586	0.570662	0.0248644	1.00615	0.0257529	4.25337	5.52289	5.48506	1.27884	0.17214	4.40574	3.17174	2.07053	3.55791	2.82995	1.85386	8.92876	8.80645	1.53727	1.0892	1.63656	2.39814	1.93037	4.85634	1.12336	7.04043	2.44559	2.53931	4.322	3.38819	0.302067	0.256741	0.0650905	0.354243	0.281751	4.51745	2.21335	3.87148	3.74776	5.94413	3.19406
CGGA_1154	369	1	9.9182	3.92619	6.26112	5.24819	3.69586	-0.00684111	4.86901	1.28981	0.241893	1.55809	0.985857	4.28144	6.1871	6.55226	3.40749	0.146052	6.88874	5.4633	3.71213	4.43018	4.38088	3.48915	4.9474	6.72868	5.37976	1.11352	3.807	2.67338	1.30785	4.10129	3.92706	5.37866	4.82508	3.2677	3.75313	5.91163	0.288971	0.137301	0.437371	0.329725	0.147389	4.16962	3.36846	4.06345	5.60474	4.05952	5.28226
CGGA_1569	1406	0	12.2037	1.7178	5.23813	4.49337	5.32483	-0.00684111	2.06141	1.57961	0.0248644	1.17797	0.0398427	4.36149	5.27036	6.42168	1.84182	0.197762	4.66704	4.05548	2.24722	4.58218	2.74902	2.08112	7.97027	9.97247	2.83052	0.967419	4.2826	2.05838	0.637144	4.32135	1.33115	7.3082	3.35046	3.17694	3.79463	4.69897	0.165944	0.245254	0.238841	0.317311	0.134515	4.44378	3.17256	3.65413	5.07148	5.05208	4.53543
CGGA_1401	1680	1	10.2252	3.53173	6.06727	5.75063	3.96629	0.151707	4.19565	0.249316	0.063623	1.67894	0.0537937	4.04892	6.04131	6.44713	3.30546	0.0924094	6.70462	4.27786	3.85925	3.92633	4.15445	3.59469	5.98037	5.93349	4.16966	1.03286	3.96869	2.45215	1.42919	4.31571	3.61652	5.68305	4.60446	3.27628	3.85923	5.98978	0.902291	0.356015	0.0145069	0.145603	0.0818081	4.04259	4.06066	4.35469	5.4926	4.34159	5.37665
CGGA_P98	317	1	10.7073	2.18879	5.31069	4.9046	4.81298	0.0739577	2.89942	0.521944	0.0888399	0.418973	0.0398427	4.63834	5.32592	6.56813	1.82697	0.565379	5.83155	3.13648	3.1187	2.93417	2.70911	2.69306	7.4799	7.66064	3.03054	2.95027	3.54608	1.98623	3.44505	6.34947	4.15373	5.84253	3.68851	3.06243	3.36658	4.85246	0.451285	0.718613	0.146239	0.187044	0.404414	4.52593	2.99051	4.20772	5.22226	4.57444	5.25067
CGGA_1695	2094	0	12.2318	2.47868	5.60835	4.56917	4.88116	-0.00684111	1.45903	0.308229	0.101269	1.78624	0.08129	3.70749	6.06952	6.55674	1.75012	0.119482	6.09585	3.01554	1.98074	3.94351	3.33523	2.3825	6.85681	6.3937	3.16205	2.27766	2.49746	1.26114	1.02018	4.05123	2.61956	6.83347	3.65938	3.04201	3.19593	4.88314	0.520916	0.221988	-0.00268873	0.0738302	0.304862	4.61777	3.37115	4.14834	5.10392	5.21041	4.81483
CGGA_1459	503	1	10.0968	3.95924	5.99113	5.17862	4.35833	-0.00684111	3.78048	1.54649	0.697298	0.695218	0.134731	4.80926	6.28865	5.91124	3.55765	0.0648166	6.37835	5.31269	3.07035	4.51595	4.07685	2.92922	6.10875	1.8379	5.30192	3.11561	5.4504	3.85836	1.63929	4.14065	3.3441	5.91446	6.11923	2.7262	3.94895	5.28671	0.630546	0.448591	0.177661	0.62042	0.304862	4.03595	3.34677	4.16549	4.52978	4.80415	5.80068
CGGA_288	1057	1	11.1879	2.62041	5.63834	5.61976	3.72432	-0.00684111	3.80681	1.68761	0.196674	0.879541	0.0537937	5.14752	5.92623	6.8208	2.41437	0.398841	6.48684	5.19442	3.04454	4.03542	3.40951	2.41268	6.83959	8.38074	3.15294	0.757856	4.63176	2.92903	0.741367	4.46751	4.22102	6.11892	7.89725	3.02474	3.40867	5.8756	0.235473	0.345333	0.0315332	1.04868	0.0270543	4.12848	3.21577	3.40508	5.88905	4.52959	5.13938
CGGA_1906	1054	1	11.8509	2.16323	5.361	4.59548	5.14614	0.0739577	3.16676	0.750245	0.161705	0.803311	0.223658	4.68808	5.74012	6.52548	1.78655	0.119482	6.14564	4.36714	2.59264	3.43019	3.25142	2.44217	8.05415	7.43389	2.56272	0.905735	2.13362	3.31537	1.43925	4.4769	4.23236	6.59894	5.16474	3.272	3.66502	5.01794	0.520916	0.124765	0.0980086	1.15118	0.293354	4.36769	3.20051	3.74775	5.47499	4.99331	5.00742
CGGA_1374	141	1	8.86181	2.91463	5.41876	5.42464	3.65951	0.0487744	3.15034	1.49586	0.347102	1.82365	0.227144	4.58185	5.14138	6.78524	4.41946	-0.016954	6.0749	2.36016	3.20712	4.64023	3.65337	2.68669	6.02937	6.15834	2.74901	2.37616	4.63963	1.97661	0.666249	3.46697	3.42876	6.63649	6.0822	3.42493	3.08645	5.19972	0.250613	0.334371	0.171604	0.201423	0.156871	4.0928	3.24799	4.60548	5.11095	4.65783	4.4348
CGGA_P122	1638	0	10.4064	3.26844	6.50565	5.68829	3.13019	-0.00684111	3.3291	0.879049	0.565238	0.537743	0.0537937	4.60724	5.77229	6.9909	3.4149	0.420747	6.09	5.34871	4.19521	3.69941	3.51281	3.36426	5.74435	4.72074	5.29812	1.27802	6.41465	1.47374	1.90924	5.17746	2.56746	5.66034	4.48196	3.52188	4.11687	6.31048	0.340715	1.38003	0.177661	0.0738302	0.22226	4.12643	4.12279	4.21692	5.082	3.77849	5.59602
CGGA_42	2832	1	10.5805	3.6079	5.97355	6.19106	4.1307	0.113199	3.66712	0.847936	0.113581	1.23112	0.248072	4.40525	5.51881	6.47117	2.37569	0.247672	5.79923	5.01518	3.30049	3.94261	3.51553	2.76992	6.1775	9.02692	3.01646	1.10748	4.61994	2.44095	1.17463	4.55382	3.23937	5.9772	4.61484	3.2677	4.0517	6.06187	0.249019	0.245254	-0.00268873	0.329725	0.054697	4.19001	3.70403	3.93815	5.66408	4.66499	5.31168
CGGA_247	609	1	8.86417	4.21252	7.29366	5.53153	2.57567	0.111405	2.53741	1.02083	0.233935	1.74995	0.624177	4.00873	6.44788	7.93065	4.05609	-0.0454878	5.57553	5.7757	2.37731	4.26166	3.8527	2.53073	4.98704	6.30344	3.51887	1.82316	1.3881	0.782533	1.53173	4.20689	2.56634	6.60237	3.34567	2.72868	2.347	6.41203	0.59283	0.386049	0.162191	0.681951	0.284526	4.07105	3.80343	5.52635	5.20147	5.40502	5.02748
CGGA_P111	1638	0	10.3331	4.14297	6.24146	5.48712	3.08055	-0.00684111	3.65557	0.561052	0.125779	1.35025	0.0676086	4.07862	5.52821	6.5262	3.34349	0.17214	6.30238	5.53811	3.72652	3.85625	3.62727	3.36853	5.57615	7.98836	4.52712	1.81898	6.35523	2.60013	1.64361	4.35809	2.95391	5.57149	3.55832	3.32387	3.91733	6.12326	0.151663	0.377134	0.0315332	0.26658	0.23436	4.0838	3.69576	4.12254	5.63081	3.98081	5.52677
CGGA_882	1008	0	9.78755	3.29003	5.86734	5.53042	2.87692	-0.00684111	3.52018	0.551377	0.285605	0.803311	0.0537937	4.63115	5.47208	6.39903	3.28603	0.565379	5.66642	4.02581	4.3599	3.10648	3.36911	3.48527	6.35228	8.24258	3.89632	3.02272	4.91569	2.43814	3.2447	6.37078	3.56389	5.28348	3.09773	3.22387	4.48204	5.62995	0.00125961	0.9372	0.0650905	1.39202	0.185321	4.12092	3.48275	4.56856	5.39589	3.98387	5.52389
CGGA_P183	1512	0	10.3783	3.80124	6.32132	5.12657	2.89815	0.0739577	1.57051	0.491883	0.173465	1.31364	0.0676086	4.21758	5.43337	6.54636	3.53356	0.210403	6.09126	5.91749	3.94757	3.8232	3.57261	3.3742	5.75531	6.57581	4.79432	2.26208	5.30642	0.869597	2.06661	4.5972	1.49553	5.67881	3.25814	3.33889	3.50487	6.01713	0.498045	0.290637	-0.00268873	0.0738302	0.210054	4.07237	3.72244	4.57999	5.33272	3.98616	5.40139
CGGA_236	706	0	13.1263	2.7353	6.74124	5.00838	1.72594	0.0394878	0.650002	2.70284	0.113846	0.972178	0.0301918	4.31262	5.41267	7.75895	3.35266	0.0654063	3.75796	5.44747	3.06864	3.33791	2.81586	2.42946	6.24309	6.14298	3.3263	0.902741	3.29098	2.33515	0.896275	4.42221	1.65665	6.4281	4.83839	2.56874	2.83831	6.2951	0.327199	1.11248	0.180936	0.390374	0.0606021	4.22469	3.68539	3.86754	6.0833	5.2156	4.92301
CGGA_1510	271	1	10.8279	3.61147	6.80908	5.69663	3.33256	-0.00684111	2.60669	1.49777	0.063623	1.43802	0.397264	4.06265	6.26471	6.64494	3.38044	0.119482	6.83572	6.06049	2.46819	5.1557	4.26846	2.91718	6.18564	6.63094	2.69168	2.38684	4.14456	2.68286	0.553389	4.13173	3.0312	5.99066	4.9783	2.57202	3.48053	5.55886	0.390816	0.149724	0.0650905	1.2135	0.425613	4.6338	3.11967	5.37602	5.50338	4.93419	5.14566
CGGA_P132	1603	0	9.70355	2.87463	6.01145	5.98385	4.2826	-0.00684111	4.59865	0.511995	0.0888399	0.463261	0.0398427	4.32733	5.02796	6.27836	3.54298	0.319426	5.83976	4.77547	3.33815	3.95246	3.15286	3.45772	5.29796	5.01348	4.8961	1.54006	5.90747	2.28653	1.73936	4.15111	3.08715	5.5172	4.08182	3.25905	4.07483	6.11723	0.288971	0.458502	-0.00268873	0.227349	0.0683177	4.19327	3.91336	4.18979	5.52304	3.77128	5.89451
CGGA_P20	1923	0	10.7397	3.50874	6.20522	6.05457	3.88229	0.170694	3.86181	0.440309	0.252958	1.73588	0.121558	4.19097	6.22839	6.4427	3.26961	0.106009	6.75335	5.27183	3.60791	3.79735	3.9811	2.93321	6.18509	8.09868	3.75317	1.09532	4.77112	2.60013	1.60866	4.47565	3.5011	5.73922	4.04442	3.1072	3.75413	5.61487	0.954897	0.137301	0.0483933	0.17336	0.415053	4.19586	3.21577	5.16499	5.52087	4.42461	5.47305
CGGA_704	2572	1	10.8433	3.55395	5.6114	5.25225	3.83708	0.0301116	3.55243	0.89679	0.54139	1.93176	0.776248	3.60288	5.65831	6.6599	2.54341	0.310216	5.83853	4.49282	2.60916	4.64503	3.71847	3.66046	5.79527	8.41895	2.18106	1.42387	3.9785	2.99904	1.51994	3.72658	2.86822	5.95367	3.83839	3.27184	4.01398	5.79024	0.442196	0.225815	0.278666	0.831033	0.196317	3.80143	3.11408	3.655	5.33852	4.48093	5.34969
CGGA_1286	2906	0	11.8552	2.35786	5.4189	4.71712	4.80894	0.151707	2.08793	1.48282	0.101269	1.59436	0.0398427	4.63012	5.38129	6.54029	1.72884	0.0648166	5.49303	4.43403	2.62391	4.21586	2.8137	2.07726	7.68931	9.56173	2.54571	0.833784	4.24611	2.20237	0.254053	4.2792	1.43219	7.19715	3.34548	2.89871	3.54526	5.02732	0.235473	0.478112	0.0483933	1.22699	0.258255	4.33042	3.24871	3.86977	5.34311	5.04121	4.86206
CGGA_1657	2215	0	11.6555	1.779	4.84831	3.77294	5.95646	0.0540532	1.9355	0.961226	0.0248644	1.12286	0.0398427	4.24574	5.51124	5.93417	1.64582	0.295904	4.84891	2.53091	2.05066	2.9419	2.72172	1.91234	8.78341	8.46263	2.2578	1.54447	2.84565	2.88887	1.79452	4.66266	3.09184	7.18105	3.21332	2.73934	3.9253	4.05741	0.137252	0.23367	-0.00268873	0.994619	0.0818081	4.73467	2.85269	3.69102	4.65851	5.89155	4.1366
CGGA_1113	1265	1	10.3533	3.18474	6.67842	4.04614	3.15063	0.0487744	2.46986	3.32194	1.03015	0.891884	0.00184609	4.19836	5.10975	8.15779	3.01878	0.264469	4.75676	4.67205	3.14486	3.83215	2.93807	3.03081	5.82138	4.9114	3.57478	0.51401	4.51879	2.75312	1.56083	3.62716	2.37351	5.94126	5.06492	3.13572	3.42327	5.99082	0.279901	1.1919	0.052946	0.506065	0.413473	4.03818	2.03771	3.5672	4.51044	4.77305	4.37754
CGGA_D24	837	1	10.8492	2.41187	4.68455	5.28296	4.39819	0.0579729	2.7534	0.370548	0.315428	0.799027	0.0160864	3.99385	6.21198	5.51994	1.7766	0.143312	6.81829	4.7907	2.14344	5.26468	3.71847	4.03509	4.75241	7.58354	3.72841	0.676421	4.09496	2.7589	0.067316	3.19197	3.74923	5.73694	4.22639	3.1649	3.35391	5.08071	0.21043	-0.0157711	-0.000553072	1.50673	0.14349	4.25173	3.74597	5.18644	5.13157	3.86871	4.77378
CGGA_P137	1526	0	9.84375	3.74678	6.26893	5.79659	3.88531	-0.00684111	3.86432	0.386773	0.219478	1.35626	0.134731	4.10143	6.14716	6.3035	3.39554	0.146052	6.72615	3.407	3.73311	4.32302	3.98299	3.42414	4.66872	6.59527	4.45991	1.38099	4.20866	2.36884	0.985669	3.70667	2.91531	5.84605	4.22787	3.27057	3.84149	5.83436	0.137252	0.279431	0.238841	0.102961	0.281751	4.10983	3.72852	4.41788	5.43025	4.13022	5.37145
CGGA_1181	318	0	11.8145	2.45541	5.63749	5.38678	4.78705	0.0739577	2.91662	1.17617	0.0888399	1.01371	0.121558	4.43742	6.02485	6.63568	1.95937	0.159155	6.3876	4.44119	2.63926	3.88285	3.44296	2.29402	7.3402	7.41659	3.25512	0.220148	2.6115	3.33324	0.504534	4.08875	4.0619	6.73231	4.57922	3.04544	3.01275	4.99291	0.451285	0.210205	-0.00268873	0.746727	0.246358	4.44325	2.87474	3.89605	5.2784	4.83219	4.8884
CGGA_1513	2352	1	11.9042	2.44065	5.67568	4.78711	3.93913	0.0540532	1.70862	0.440309	0.063623	1.07292	0.0257529	4.60303	5.46817	6.71368	1.82199	0.119482	5.49876	4.97638	2.57672	3.76893	2.77094	2.40069	7.50551	7.00054	2.50518	2.06587	3.56849	1.28714	1.21066	4.93593	2.45169	6.69391	3.3254	3.30309	3.49397	4.99695	0.208028	0.608058	0.0483933	0.102961	0.361034	4.54221	3.20204	4.00617	5.3036	4.77996	5.18837
CGGA_P173	1448	0	9.62243	3.69992	5.81417	5.975	4.43528	-0.00684111	5.89331	0.212748	0.0762921	1.43802	0.108262	4.31946	5.71417	6.05482	3.7958	0.319426	6.42381	3.32368	3.64242	4.22676	3.73813	3.42005	5.42771	8.06687	3.92573	0.529042	4.6806	3.46046	1.09959	3.85156	4.51335	5.41512	4.80405	3.19987	4.36414	6.06078	0.415282	0.0864553	0.0650905	0.670291	0.013027	4.36881	3.98545	3.98206	5.42175	3.64488	5.6639
CGGA_1059	21	1	10.2312	2.17774	6.01627	5.099	4.17166	0.00142661	3.85656	0.839148	0.217223	1.00425	-0.0565184	4.63887	6.74517	7.00575	2.92002	0.0786867	6.84132	4.4546	2.69966	4.18842	3.98405	3.81548	6.92073	7.06492	3.10306	0.413341	2.72803	3.18093	0.938703	4.10591	2.25523	5.73414	4.35618	2.74464	4.234	5.9301	0.450607	0.0323424	0.0838358	2.75028	-0.0271169	4.27239	2.99885	5.19723	5.58674	4.6618	4.83124
CGGA_890	2982	1	10.1905	2.9183	5.89672	5.53042	3.5905	-0.00684111	2.80751	0.273178	0.447192	1.65946	0.223658	4.44757	5.73773	5.78737	3.11733	0.17214	5.83643	4.90869	3.09922	4.20634	3.95529	2.85097	6.02581	8.02423	2.91364	0.69394	4.03212	2.58247	1.15626	3.82302	3.46384	5.56489	3.20235	2.90828	3.53114	5.4042	0.365964	0.323715	0.423922	2.28314	0.108408	4.42398	3.38714	4.94709	5.20132	4.60939	5.15113
CGGA_P346	522	0	11.0231	2.70767	5.41143	5.53013	4.75754	0.189508	3.42444	2.09802	0.0888399	1.31981	0.211291	5.05886	6.11567	6.93513	2.24507	0.106009	6.73316	4.31328	2.44476	4.05866	3.70457	2.38859	6.79806	8.8865	4.00152	2.1392	2.04643	3.0375	0.34649	4.39249	4.38468	6.41119	6.74745	3.37766	3.19441	5.08737	0.509522	0.0603081	0.130311	0.436975	0.108408	4.45593	3.83783	3.87575	6.02058	4.76316	5.41719
CGGA_605	4300	0	11.4567	3.07153	5.41876	5.0097	3.28881	0.00142661	4.29199	3.22649	0.233935	0.599787	0.00184609	5.06887	5.34035	6.95681	3.78407	1.11657	5.62033	4.8302	3.70952	3.97782	3.93289	2.59493	6.04992	8.87161	3.8433	2.98299	3.49307	4.14827	0.676086	4.50817	4.2609	5.30018	7.90844	3.28462	3.47652	5.82338	0.399244	0.0943584	1.41008	2.51906	0.0606021	4.66196	3.26716	4.18464	5.28805	4.17809	5.65862
CGGA_P438	1023	0	10.6385	2.9142	6.05585	5.24747	3.24775	-0.00684111	3.32361	2.49572	0.306926	0.326253	0.0257529	4.78711	5.99455	7.00571	3.50213	0.319426	6.0081	5.66538	3.4326	3.73779	3.57391	3.27575	6.30499	7.56852	2.94168	1.85808	5.4908	2.71554	0.411923	4.68678	2.56283	5.8164	5.30268	2.99305	3.86571	6.2775	0.0631516	0.85093	0.0315332	0.292164	0.246358	3.6743	3.80497	3.24615	5.63477	4.0667	5.09491
CGGA_1435	1657	1	10.758	3.30975	5.62344	5.13053	3.53835	0.0540532	3.79502	1.02507	0.113581	1.57374	0.147782	4.84069	6.49761	6.64078	2.90411	0.0508186	6.78154	5.00665	2.91342	4.14232	3.89803	3.16916	6.32321	7.15748	3.40907	2.05376	4.19357	3.6508	1.32974	4.45805	4.98748	6.16041	4.52003	3.25471	3.57878	5.51072	0.587603	0.149724	0.177661	1.43346	0.0409434	4.47471	2.84457	4.40549	6.01751	4.20232	5.31681
CGGA_685	3239	1	9.90728	3.5494	5.32985	4.68166	3.5884	0.0301116	3.87411	0.470201	0.131458	1.56014	0.00184609	3.75414	5.42302	6.37701	3.48964	-0.00289617	4.73384	3.76871	2.99668	4.65458	3.30269	3.8341	6.56513	7.51457	2.85554	1.78459	4.03189	2.95218	2.11937	3.26428	2.9852	5.271	2.6972	2.75786	3.93315	5.17797	0.570252	0.718455	0.0838358	1.27007	0.170135	4.15723	2.98467	4.29671	4.06776	4.61777	4.27766
CGGA_2079	964	0	11.056	3.61266	6.41167	5.1945	1.92449	-0.00684111	1.74811	0.924466	0.137864	0.588759	0.0398427	4.28887	5.98844	7.21473	3.45135	0.185008	6.29336	5.33938	3.71325	3.88191	3.83176	3.51097	6.08972	4.07146	3.16568	0.796345	5.41632	1.33152	0.749703	4.50162	1.43219	6.25529	6.16688	3.44933	3.1481	6.57266	0.00125961	0.256741	0.0315332	0.17336	0.160147	3.97923	3.68221	3.90524	5.65925	4.14578	5.20676
CGGA_P156	1488	0	10.085	3.51388	6.23312	5.41799	2.9675	0.0540532	3.68997	0.353646	0.161705	1.35025	0.0398427	4.2047	5.54217	6.59563	2.99075	0.342568	5.82846	5.00494	3.84828	4.09116	3.33054	3.38827	5.96616	7.60144	3.72578	2.15623	5.71674	1.68741	2.09168	5.1239	3.04743	5.66465	3.31356	3.44435	3.76213	5.97658	0.208028	0.268133	0.081628	0.102961	0.160147	4.44378	3.9002	4.64086	5.75051	4.26197	5.46974
CGGA_D27	3650	0	10.7873	2.61275	6.73255	4.75987	4.07697	0.128581	0.92154	0.89679	0.266939	2.36521	0.624177	4.18353	5.38715	6.62319	3.31421	0.310216	4.13342	5.9226	4.06535	3.57524	2.59716	2.87175	4.21508	5.64506	2.79371	2.48476	5.34166	1.24022	1.89908	4.26179	1.54438	6.6417	2.65197	2.98674	2.97588	6.1546	0.733496	0.95	0.103956	0.253737	0.84936	3.30937	2.96564	4.579	5.45381	4.53712	5.99354
CGGA_P19	1924	0	10.1469	3.74891	5.61331	6.12976	3.51949	0.189508	4.59716	0.716114	0.149839	1.51554	0.173528	3.93431	6.07403	6.30453	3.1772	0.247672	6.58398	4.81298	3.43673	4.19749	4.14031	3.50459	5.02296	8.87427	4.47041	1.38594	4.38203	2.05838	1.61748	4.49055	3.73534	5.36089	4.25025	3.27486	3.75714	5.98355	0.415282	0.356015	0.177661	0.117313	0.210054	4.01282	3.55086	3.80481	5.63625	4.1117	5.39309
CGGA_1771	1068	1	10.3906	2.97625	6.30544	5.1094	3.09731	-0.00684111	1.78654	0.924466	0.101269	1.15754	0.0537937	4.55856	5.81021	6.8504	2.6677	0.354001	5.87156	4.70253	3.83316	3.81431	3.31795	3.47222	6.55124	6.94097	3.71975	3.10292	4.14363	1.02572	3.1792	5.91391	3.51139	5.44407	2.90151	2.90637	3.43559	5.61487	0.208028	0.312777	0.19316	0.493344	0.536833	4.38061	3.80402	5.34462	5.21253	4.75239	5.18154
CGGA_707	3299	1	9.55352	3.43035	5.72053	5.67298	3.98594	0.0936718	3.23277	0.77531	0.173465	1.05833	0.0257529	4.57804	4.81338	6.10181	3.49658	0.222934	5.32871	4.52367	3.5897	3.70589	3.04223	3.40633	5.97075	8.68375	3.93711	2.3652	5.78014	2.42966	2.47598	5.5783	3.47442	5.22658	3.29474	3.08915	3.82065	5.80619	0.427374	0.782471	0.208522	1.24701	0.185321	4.2361	3.65572	4.59621	5.27774	3.94506	5.26674
CGGA_426	1560	1	11.4396	2.41935	5.87285	2.14002	3.6391	0.00142661	3.30855	1.80447	-0.0521997	0.247129	-0.0565184	5.31288	5.7098	3.13612	3.21257	0.130617	4.69806	4.56612	3.59214	5.54947	3.15291	2.41678	6.11755	4.20992	4.76074	0.86387	2.38109	3.19262	0.433711	2.54474	4.57751	6.74167	6.94992	2.90869	3.11625	4.37072	0.260454	-0.0157711	0.0838358	0.362224	0.0319266	2.66955	2.71233	4.69142	4.4432	4.43363	5.36106
CGGA_P155	1483	0	9.86119	3.65358	6.22329	5.28509	4.24156	-0.00684111	3.72355	1.23114	0.137864	0.895966	0.173528	5.15814	6.57644	6.47177	3.28766	0.841636	6.73079	4.56991	3.32021	3.91812	4.0891	3.25109	5.81391	8.45133	5.78136	2.18968	4.79287	4.27752	2.43316	5.57293	3.26565	5.21137	3.81514	3.16299	3.78878	5.98007	0.390816	0.478112	3.63988	0.102961	0.304862	4.04772	4.21817	4.30855	5.37743	3.7006	5.38377
CGGA_1158	3188	0	11.0861	3.13413	5.87351	5.67196	4.54182	-0.00684111	2.93843	0.200344	0.0888399	1.62977	0.121558	3.9236	4.86447	6.49503	2.21212	0.0366828	6.39303	4.65292	3.35144	3.89782	2.85734	3.00299	6.76555	7.03103	2.82355	1.88584	5.84247	1.28714	1.21066	4.05209	3.44481	6.10757	3.45119	2.93841	2.69302	5.66585	0.427374	0.9372	0.208522	0.117313	0.316277	4.40714	3.399	4.17837	5.53543	4.77711	5.18534
CGGA_1162	3174	0	12.4896	1.72302	4.01703	2.7005	5.93022	0.151707	1.9208	1.01812	0.0508303	0.70453	0.646328	4.44041	5.19868	4.84571	1.18477	0.132828	4.09666	2.32126	1.93777	4.36603	2.43967	1.59474	9.2106	8.23577	1.38598	0.993969	1.31222	2.51218	1.36723	4.01794	1.57071	6.89392	2.44868	2.17925	3.92971	2.88195	0.00125961	0.174237	0.0315332	1.78948	0.054697	4.46223	2.16197	4.02073	2.97466	5.70755	3.03515
CGGA_1567	840	1	11.6986	2.02717	5.31659	4.14097	5.55016	0.113199	3.03151	0.961226	0.063623	1.28244	0.341727	4.50341	5.74725	6.5655	1.92289	0.409836	5.58603	3.30578	3.09565	3.57705	3.0827	2.4216	7.95941	7.70117	3.01848	1.92978	2.85721	3.50695	2.76219	5.28478	3.17205	6.73144	4.48574	3.14887	3.94634	4.5155	0.315055	0.448591	0.615426	0.366351	0.349977	4.57366	2.75166	4.34168	4.96654	4.99914	4.95096
CGGA_1307	965	0	10.4655	3.24971	5.50421	6.44932	4.50621	0.0301116	4.25288	2.16186	0.00472327	0.925933	0.2874	4.6557	6.04365	6.47152	2.24563	-0.016954	7.43191	3.88153	3.23119	3.94269	4.31843	2.89229	4.97867	6.67465	3.40756	1.62657	2.4048	3.37523	0.500414	3.54801	3.95368	6.15183	4.52379	3.94795	4.12029	5.65092	0.390469	-0.0157711	0.0318586	0.158079	0.129988	4.15723	1.55611	3.3222	6.26454	3.24696	5.69741
CGGA_1562	2032	1	11.0427	2.50154	5.41687	5.35213	4.4802	0.113199	1.1475	0.968464	0.101269	0.928283	0.235918	3.73995	5.05525	6.52061	2.10397	0.594562	5.84155	4.05979	2.723	3.99632	2.67054	2.56712	6.88689	7.82309	3.22769	2.65079	4.75563	1.82089	2.98417	5.38145	2.60392	6.45156	3.27045	3.04201	3.44571	4.96117	0.619919	0.742909	0.19316	0.727987	0.382891	4.52791	3.27359	4.54387	5.33556	4.54193	5.02913
CGGA_333	1783	0	8.94214	2.73747	5.11674	5.38977	5.36812	0.0939191	3.543	0.370548	0.54139	1.74633	0.475738	4.0757	4.44004	6.72076	2.81263	0.229179	5.23459	3.53512	2.90915	3.54465	2.28294	3.00186	6.51863	7.12092	3.52899	2.03234	4.60602	2.33515	2.66676	4.92941	3.4376	5.53753	3.95449	3.03429	3.94346	5.7971	0.72014	0.280998	0.368393	0.556324	0.296715	4.11656	3.81374	3.69082	5.4484	3.70634	4.78623
CGGA_1246	2972	0	10.9401	2.9954	5.67077	5.4936	3.08987	0.111405	2.64801	0.805194	0.0233367	1.24149	-0.0125318	3.1546	4.73919	7.15045	2.35501	0.241039	5.82702	4.65368	3.32784	3.53058	2.92815	2.8385	5.99019	8.39527	3.41731	1.16791	5.18732	1.9861	2.0818	4.63473	1.37	6.40117	2.74872	3.625	3.59239	5.83272	0.220601	0.531912	0.0633396	0.333481	0.259846	3.85981	3.16981	4.22441	5.34131	4.02472	5.75551
CGGA_1388	485	1	11.0808	3.32296	5.93839	5.22669	4.62651	0.00142661	5.47379	1.34751	0.00472327	0.666861	0.112126	5.24691	5.26881	6.67884	3.74997	0.0110258	7.51005	3.1047	3.97022	4.10393	3.89633	3.14107	3.11487	6.00949	3.20561	0.562095	1.46328	2.71403	1.06764	4.10974	4.78436	5.56429	5.52163	3.35372	4.60585	6.39062	0.354719	0.0323424	0.171604	-0.0305278	0.129988	4.83642	3.45341	3.37785	5.9847	3.8669	4.87655
CGGA_D28	860	1	11.1485	3.42486	5.50346	5.36303	3.5344	0.0936718	2.6218	0.429763	0.0379116	1.33206	0.08129	3.64445	6.10334	6.43146	3.5403	0.0786793	6.71518	4.17834	3.32622	3.65429	4.16024	2.93917	5.96271	5.06316	3.12895	1.03923	2.60326	2.28966	1.09315	3.55885	2.97621	5.80978	4.1699	3.36708	3.45325	5.67592	0.235473	0.366615	0.0145069	0.26658	0.185321	4.06011	4.01881	3.88001	5.56221	4.61543	5.6541
CGGA_889	3943	0	9.92428	3.30371	5.79014	5.57782	3.57526	-0.00684111	1.80269	0.123535	0.101269	0.666928	0.0676086	4.24015	5.52821	6.69198	3.1321	0.849719	6.29087	3.14496	4.37667	3.18082	3.64458	3.42822	6.89776	7.06542	4.58413	2.21963	4.61068	1.30634	3.69641	6.74081	1.92405	5.2649	2.27821	3.76694	3.93849	5.55983	0.451285	0.836009	0.208522	0.187044	0.349977	4.25357	3.27068	4.15728	5.44043	4.41486	5.54558
CGGA_863	2073	1	9.71744	3.28543	5.51827	6.60426	2.97515	-0.00684111	3.63951	0.521944	0.0508303	2.02306	0.173528	4.3487	5.22578	6.03705	3.18074	0.235356	5.96168	2.94882	4.10635	3.35081	3.85388	2.754	5.87252	11.0078	3.90162	0.905735	4.04109	2.71785	1.52659	5.13825	4.23369	5.67433	3.4968	3.03685	3.51568	6.0017	0.474838	0.0734439	0.31239	0.589665	0.17279	3.84527	3.22182	3.56842	6.22615	4.01855	5.23875
CGGA_1057	1549	1	11.217	2.08334	5.15324	5.23153	5.50638	0.0339544	4.29521	2.50545	0.0508303	0.879541	0.0398427	5.43307	6.31877	6.28744	1.76586	0.146052	6.20634	3.49858	2.83489	4.02954	3.03634	2.10406	7.17132	9.82236	2.56554	0.609623	2.43679	3.91015	0.192926	4.23938	4.73994	7.00143	9.17436	3.12821	4.12146	5.62597	0.180097	0.033653	0.0980086	3.03982	0.013027	4.51345	3.11146	3.7288	5.5843	4.99262	5.10507
CGGA_809	1252	1	11.2945	2.849	5.81392	5.92749	4.63181	-0.00684111	4.22315	0.989958	0.173465	1.295	0.108262	4.45409	6.17752	6.60116	2.42702	0.159155	6.61786	4.09964	2.90929	3.91995	3.53706	2.63163	5.82942	7.74772	2.42344	1.41528	3.24853	3.76606	1.18675	4.34296	4.86799	5.98228	4.68356	3.1831	3.40996	5.54323	0.543459	0.668692	0.369056	1.27977	0.270052	4.4202	3.75551	4.45764	5.46906	4.731	4.89129
CGGA_1141	432	1	10.7924	2.29289	5.54493	4.81588	4.12321	0.0936718	2.45617	0.450776	0.208125	0.879541	0.134731	5.18147	5.57358	6.50396	1.79677	0.45299	5.82691	2.47385	3.1805	2.96671	2.7996	2.70738	7.40776	7.03168	3.81201	3.6051	3.24329	2.67338	3.92483	6.51696	3.83195	5.72229	2.75162	3.01602	3.52759	4.55823	0.22181	1.03793	0.114236	0.547632	1.15622	4.4881	3.1131	4.79926	4.92668	4.66097	5.25856
CGGA_1664	1528	1	10.7666	2.29954	5.66233	5.13527	4.48871	0.113199	2.06141	0.471479	0.0888399	1.02874	0.08129	4.7454	5.49662	6.71306	1.95937	0.247672	5.6415	3.30728	3.1704	3.24047	2.77335	2.91111	7.22668	8.748	3.23632	2.98002	4.46906	1.82964	3.3186	6.54034	3.13179	6.17863	3.57967	3.38292	3.50366	4.99695	0.498045	0.72676	0.0980086	0.493344	0.612541	4.64423	3.39374	4.3884	5.58533	4.7718	5.34609
CGGA_521	514	1	10.3515	3.04842	5.71759	5.6227	4.22142	0.0339544	5.24556	1.12543	0.219478	0.608688	0.0398427	4.51644	6.37924	6.15755	3.51452	0.354001	7.25413	5.30379	3.78567	3.50505	4.40292	2.98015	5.96172	6.38841	4.84933	2.37004	4.26065	4.09312	1.33516	4.25205	5.09471	5.38236	5.09768	3.54632	4.29069	5.83071	0.403096	0.544623	0.081628	0.765231	0.23436	4.09653	3.7858	3.96467	5.90482	3.78298	5.81121
CGGA_267	1374	1	11.4964	2.24597	4.85965	6.92367	4.58862	0.0206438	0.895651	0.300262	0.217223	1.00425	-0.0125318	3.08909	4.81057	5.34095	2.16841	0.168372	5.59275	3.63405	1.96958	3.58487	2.99504	2.46208	4.97867	7.7464	2.9078	1.09281	1.15959	0.466176	0.695587	3.49693	1.10127	5.51806	2.93657	2.86366	3.86994	4.86375	0.0583061	0.154098	0.0838358	-0.135597	0.102616	3.55516	3.51002	3.9499	4.23048	4.51759	4.27254
CGGA_1640	2267	0	11.8813	1.62015	5.02853	3.68736	4.95646	-0.00684111	2.0703	0.77531	0.306926	1.61469	1.79563	4.4868	5.36864	5.78894	1.53869	0.0224062	4.91397	3.35734	2.10555	3.81133	2.61725	1.79259	8.64824	7.78503	1.76233	2.70861	2.3959	2.55685	2.60971	4.84087	3.36334	6.77613	3.37019	2.57698	3.90573	3.97781	0.0782527	0.468342	0.437371	0.402086	0.752754	4.7376	2.67488	4.5403	4.56458	5.67329	4.27673
CGGA_400	1321	1	11.3184	2.18328	5.03444	4.91803	4.44582	0.120031	4.35679	0.855842	0.131458	0.991513	0.34531	4.21987	5.58507	6.57082	1.91959	0.499806	6.76384	4.47028	3.21999	5.24656	3.55061	3.8128	6.5377	8.01083	3.00208	1.47191	3.31042	2.18986	2.00404	5.40103	3.9497	5.34262	4.48731	2.98194	4.08172	5.53172	0.442196	0.267377	0.13346	0.124643	0.00269431	3.95576	3.53882	3.409	4.95626	3.81758	5.07368
CGGA_358	122	1	11.5327	2.07151	5.17562	5.08258	5.88106	0.0540532	3.64098	0.95395	0.208125	0.657377	0.0398427	4.04811	5.60631	6.65039	1.80185	0.185008	6.2898	2.52825	3.06303	2.95532	3.03043	2.65161	7.49996	7.12166	2.49929	1.61318	3.52474	2.82638	2.25255	5.35818	3.80021	6.3395	6.09369	2.86564	3.85179	5.03223	0.509522	0.544623	0.0145069	0.102961	0.293354	4.34604	3.29656	3.75339	5.18002	4.16181	5.05384
CGGA_1027	2688	0	12.7381	2.57583	5.98437	5.29848	2.57567	0.00142661	2.61296	2.07179	-0.0521997	0.891884	0.26359	5.96879	5.55471	7.56527	2.76905	-0.016954	4.37602	4.99538	3.76705	3.61349	2.86422	3.28558	6.14791	3.24906	3.27531	1.82316	4.83158	3.04614	1.40364	4.95736	3.38029	6.37969	7.94745	3.14474	3.39523	5.78369	0.372725	0.611329	-0.000553072	0.124643	0.308807	4.52855	2.77226	3.95289	5.94597	4.06185	5.71391
CGGA_P21	1922	0	11.7176	2.68088	5.91494	5.04251	4.34733	-0.00684111	2.89942	0.750245	0.113581	1.02124	0.0537937	4.49714	6.1123	6.81527	1.90426	0.119481	6.0429	4.53946	2.60576	3.82909	3.36759	2.66148	7.44167	9.24382	4.64685	1.14921	2.45526	4.27902	0.534057	4.3683	2.93826	6.71369	4.99218	3.07084	4.02981	4.72982	0.403096	0.0470452	0.0315332	0.187044	0.210054	4.63153	2.91388	3.88425	5.67466	4.90688	5.03728
CGGA_1880	1302	0	12.4902	2.64596	5.87185	5.4901	3.72091	-0.00684111	1.89595	0.419138	0.0762921	1.08015	0.0537937	4.02432	6.13258	6.68584	2.01656	0.119482	6.45041	4.49465	2.4969	3.68309	3.30363	2.1955	7.03723	6.10172	2.36934	1.0892	2.21211	2.75198	1.27433	4.05555	3.62701	6.54826	3.36036	2.66307	3.04365	4.95598	0.692845	0.535316	0.0483933	0.117313	0.338833	4.21199	3.20663	3.99301	5.2909	4.78403	4.90517
CGGA_1655	1209	0	11.8671	2.25226	5.22753	4.87491	5.22574	0.0339544	2.80223	0.924466	0.0379116	2.52431	0.160713	4.50626	5.97328	6.48516	1.66285	0.185008	5.50212	3.96352	2.51662	3.85721	3.09966	2.01786	7.74873	9.49471	2.91146	0.652428	1.66363	3.58445	0.698905	4.24536	3.04904	6.93566	4.37767	2.63028	3.80239	4.77263	0.598449	0.210205	0.146239	1.58846	0.0683177	4.43953	3.22182	3.93163	5.18252	5.04352	4.68304
CGGA_458	419	1	10.4009	2.60587	5.32087	4.647	4.59302	0.00142661	3.33641	0.239086	0.250507	0.878015	0.0301918	3.87909	5.49376	6.02326	2.14441	0.155897	5.7842	4.09673	3.24233	4.42645	3.37785	2.59962	6.99015	7.15056	2.68297	1.97882	4.36148	1.36245	2.51438	5.99116	3.33422	6.49059	3.42497	3.05771	3.52672	4.9232	0.345615	0.168696	0.0633396	-0.0952427	0.284526	4.45109	2.86333	4.31943	4.11003	5.03269	4.68537
CGGA_300	2199	1	9.52501	1.99016	5.33119	5.46354	3.6139	0.00142661	2.92205	0.613226	0.217223	0.898764	-0.0125318	4.46439	5.57547	6.63792	1.91418	0.489903	5.91748	3.51786	3.30795	3.23395	2.987	2.77689	6.68395	9.50869	3.67939	1.76777	4.05234	2.0018	3.27302	6.63912	3.14341	5.2604	3.52159	2.81004	3.83257	4.96938	0.491811	0.211723	0.103956	-0.135597	0.424665	4.94186	3.51388	3.81239	5.78296	4.01791	4.76217
CGGA_474	2029	0	10.7221	2.75499	5.42127	4.49534	3.6515	0.151707	1.82395	3.28669	0.101269	2.69791	0.542092	4.64295	6.23328	6.48531	2.18591	0.0366828	6.28873	5.38152	2.54155	4.28619	3.62353	3.20192	6.7428	2.89515	4.03551	0.940345	1.75198	4.41809	0.335272	4.06328	1.68731	5.64528	3.87279	2.94768	2.88541	4.74712	0.486484	0.00647017	-0.00268873	0.102961	0.013027	4.34431	2.64185	5.19456	5.19142	4.34159	5.37438
CGGA_1100	3314	0	8.20923	2.73155	4.72194	2.05704	1.99816	-0.00684111	1.45219	0.136631	0.0762921	2.28979	0.0398427	3.57108	4.33528	3.60532	1.37366	0.0224062	3.13454	4.35128	2.20169	3.43814	1.60506	1.05808	3.53844	4.72186	2.53137	0.993969	4.54408	1.7442	2.32246	2.19768	1.18981	4.99108	0.997864	1.48492	3.09525	4.27627	1.48463	0.0470452	0.0483933	0.26658	0.134515	2.83889	1.73311	3.05533	2.92161	3.62676	4.18025
CGGA_1022	518	0	10.4432	2.94649	5.09764	5.33924	3.82874	0.0301116	4.44717	1.8089	-0.0715466	0.405618	-0.02705	4.32772	4.82022	5.84189	3.0603	0.0110258	6.20409	3.79946	3.66206	4.08702	3.86556	2.66411	4.71523	8.03258	4.38366	2.49559	2.61991	3.74194	1.39091	4.12119	4.32559	4.90024	6.22786	2.70184	3.6691	4.81698	0.0349322	-0.0157711	0.0318586	2.06165	0.102616	2.07651	2.73595	3.18492	4.51848	3.52458	5.13464
CGGA_1473	265	1	11.6324	4.00465	5.03176	1.2957	6.0221	0.62661	1.73132	2.89277	3.98727	3.46532	4.23625	3.94139	6.94856	4.32667	1.16015	0.0224062	3.7683	3.577	2.91958	4.2483	2.85734	1.45834	7.66566	8.05717	3.52949	3.6797	4.16473	4.65698	3.25134	3.5034	5.30937	5.78356	5.97281	1.96998	5.53258	2.6155	0.00125961	0.00647017	1.24625	1.64008	2.82885	4.19781	2.67254	3.62859	5.11038	5.13403	3.83044
CGGA_662	284	1	9.54782	3.31456	5.10892	6.1085	3.11612	0.0670851	2.96029	0.716815	0.183365	1.06615	0.0580076	3.22526	4.14295	6.36794	2.91511	0.130617	5.93246	3.50666	3.16472	3.18067	2.66196	2.72455	5.33379	9.50686	3.54706	0.562095	5.25297	2.16474	1.39729	4.09051	2.78917	6.03282	2.95392	3.19594	3.26477	5.79808	0.3085	0.718455	0.093942	1.97718	-0.0271169	3.1769	3.07319	2.90002	5.70853	3.17194	4.62922
CGGA_493	2382	1	11.0294	2.85572	5.3918	5.30264	2.56074	0.0206438	2.51718	0.459447	0.0233367	0.905609	-0.02705	4.10787	5.35383	6.36043	2.74778	0.205164	5.62265	4.17777	3.31715	3.51784	3.29154	2.4546	6.34815	8.5344	2.78264	1.69871	3.8841	2.52716	2.30655	5.45606	1.92035	5.6222	3.3587	2.5314	3.7361	5.04815	0.179397	0.347445	0.0633396	0.124643	0.209239	3.37909	3.59734	3.85819	4.15816	4.07521	3.82579
CGGA_1594	480	0	12.279	1.90684	4.14113	2.31614	5.5008	-0.00684111	1.63221	1.20087	0.348556	1.54228	1.30039	4.6752	5.53723	4.61848	1.1266	0.0224062	2.8462	2.88684	1.4631	4.50896	2.70911	1.28447	9.23884	7.66635	1.10582	0.833784	1.20504	2.0804	1.56824	2.88451	1.74414	6.90547	1.92075	1.36861	4.58668	2.91879	0.00125961	0.468342	0.0483933	0.425437	0.293354	4.07667	1.81395	4.43846	2.93955	5.69004	2.77454
CGGA_1437	1037	1	10.2846	2.47001	5.4632	5.23408	3.79163	-0.00684111	2.30291	1.05254	0.125779	0.98321	0.0537937	4.52598	5.16066	6.66633	2.11998	0.354001	6.12547	2.53357	3.68174	2.84806	2.84372	2.8762	6.94262	7.49018	3.59722	3.18138	4.03811	2.17542	3.73228	6.76052	3.7752	5.53715	2.96561	3.39596	3.38252	4.98734	0.439375	0.693879	0.208522	1.31815	0.527076	4.45066	3.01742	4.32612	5.15285	4.502	5.1895
CGGA_1223	682	1	10.4768	2.98598	5.68889	4.98437	4.65688	0.0739577	2.68931	0.894351	0.161705	1.15067	0.0398427	5.14511	6.86833	5.64491	2.09994	0.0224062	6.49971	5.32694	2.06658	4.05619	3.28268	2.47669	6.84275	3.51782	4.18006	1.97558	1.39246	3.23036	0.790635	3.42187	4.15724	5.72832	3.96873	3.1072	3.30788	4.94132	0.415282	0.408215	0.0315332	0.159547	0.013027	4.51895	3.14238	4.85963	5.34405	5.11763	5.40994
CGGA_725	4147	0	8.49482	2.55948	4.85044	6.18406	3.15633	0.00142661	2.98702	0.0673626	-0.0140683	1.09012	0.00184609	4.1732	3.61529	5.88391	2.64916	0.241039	4.33736	2.37476	2.6852	3.3947	1.91173	2.31258	6.41277	10.1492	2.84335	0.292083	6.5892	1.96066	1.59509	3.85526	2.20356	4.78036	2.78205	2.46687	3.58537	5.26504	0.260454	0.779501	-0.000553072	1.17935	0.296715	3.90811	2.7281	3.51087	4.73812	3.42965	3.55475
CGGA_103	1188	1	10.6522	3.94832	6.14902	5.62803	3.22533	0.0339544	3.87679	1.4473	0.149839	2.42492	0.341727	4.28347	5.57659	6.17463	3.60709	0.365343	6.09876	5.48089	3.47068	4.08714	4.16517	3.33979	5.76366	8.22317	4.25067	2.1306	4.49235	2.536	2.22749	4.59264	3.87689	5.78109	3.4953	3.29188	4.10533	5.86675	0.781912	0.750913	0.162022	0.187044	0.054697	4.08095	3.41076	4.53417	5.56823	4.27053	5.40551
CGGA_796	559	0	8.95426	2.50734	5.35703	6.1085	5.76811	0.0301116	3.51953	0.324056	0.315428	1.09012	-0.02705	4.14892	6.02176	4.53452	2.23182	1.13574	6.51488	3.40247	2.60701	3.78439	2.85395	1.96303	6.04385	10.1516	4.38245	0.538231	1.91576	3.51992	1.27861	4.86906	4.0925	5.4757	3.89899	2.82292	3.44019	4.57946	0.3085	0.154098	-0.000553072	2.39011	-0.0271169	4.7816	3.21787	3.44351	5.84051	4.24754	3.40789
CGGA_2121	346	1	10.024	2.28621	5.03038	5.60114	4.0896	-0.00684111	3.93873	2.11091	0.358761	0.578694	0.0676086	5.58518	6.23707	5.91901	2.25587	0.0786793	6.6703	5.12452	2.83489	3.49244	3.40803	2.44217	6.7867	7.47253	2.48743	1.1609	3.9843	3.89935	0.265957	3.98922	5.23156	5.65648	6.43327	2.56704	3.6325	5.53039	0.032509	0.149724	0.0483933	1.10082	0.210054	4.09089	3.43776	3.72689	5.63527	3.53203	5.05342
CGGA_1319	2861	0	11.9386	2.20317	4.77153	3.95486	4.60925	0.208152	1.81867	1.93705	0.0508303	1.64469	0.0948405	4.31419	5.95008	6.02311	1.72347	0.197762	4.79513	4.14159	2.52498	5.59032	3.47696	2.20605	8.00161	7.27337	2.3164	1.58354	1.02305	1.51262	1.13763	4.42989	1.61387	7.32233	3.0019	3.1023	3.9662	3.96081	0.587603	0.0470452	0.208522	0.253619	0.160147	4.63653	2.49498	4.24285	4.56162	5.55712	4.35879
CGGA_663	4210	0	9.43677	3.78991	6.06707	5.46126	3.06358	-0.00684111	2.92636	0.261298	0.348556	0.70453	0.08129	4.2506	5.36227	6.35656	3.08919	0.651205	5.88815	4.37602	4.0467	3.63966	3.44152	3.67667	5.92457	7.94498	4.98796	2.74585	5.30032	1.20762	3.27109	6.14166	2.53472	5.10398	3.04141	3.3017	3.9111	5.70451	0.208028	0.813319	0.208522	0.159547	0.497397	4.30037	3.64713	4.3838	5.31166	3.94978	5.33607
CGGA_D56	64	1	13.5608	2.84541	5.81369	4.23825	5.32353	0.178358	2.29461	2.58861	0.555569	1.80647	0.679641	4.79573	5.45492	7.04089	2.71545	0.595265	4.54425	6.06037	2.9369	3.79058	3.3481	2.40402	6.76456	8.28586	3.86732	2.18744	4.56886	4.24028	1.56083	3.59661	2.91357	6.09384	4.74646	2.29766	3.87232	5.13859	1.06306	1.53326	4.85319	0.580777	0.356226	4.25794	2.90279	3.97813	5.07931	4.21306	4.68993
CGGA_492	652	0	10.4576	3.2731	5.85203	5.27244	6.08319	-0.00684111	4.72634	3.39122	0.137864	1.59947	0.121558	5.16664	6.51501	6.47625	3.13759	0.197762	6.75311	4.98944	3.44085	3.86962	4.39539	3.44573	6.27937	7.94555	3.40452	1.38099	4.8183	4.28501	0.637144	4.16624	5.11851	5.9772	6.98825	3.2989	4.27987	6.08452	0.0782527	0.544623	0.0483933	2.01034	0.425613	4.58697	3.89135	4.19046	5.78446	4.34217	5.45186
CGGA_457	75	1	10.736	3.48664	6.18245	4.55049	1.8353	0.0936718	1.73132	0.961226	0.0762921	1.45497	0.173528	4.6637	7.02242	6.23414	3.41785	0.0224062	6.61525	6.2158	3.07581	3.63057	4.80415	3.01426	5.92355	3.96689	4.81182	3.41234	5.03015	5.50115	1.38299	3.72568	1.62327	5.9115	2.93502	3.56691	3.55575	5.0656	0.262449	0.0734439	0.0483933	0.17336	0.108408	4.31461	3.01564	4.49462	6.11219	4.7453	4.89609
CGGA_1427	339	0	10.93	1.91582	4.50152	5.18583	5.60565	0.113199	1.98815	0.707451	0.219478	1.07292	0.108262	4.17341	4.74539	5.89077	1.70721	0.146052	6.52903	2.59838	2.77672	3.69508	2.97183	1.99744	7.62586	8.84802	2.42966	1.40068	4.86174	3.35673	2.30929	4.76209	3.8682	6.81972	3.7799	2.86564	2.89492	4.6456	0.365964	0.418421	-0.00268873	0.888625	0.185321	4.4773	2.98687	3.78759	4.45123	4.62467	4.31037
CGGA_D16	261	1	10.2435	2.37913	5.1617	4.70625	3.77164	0.00142661	4.27257	3.47609	0.0960748	0.323455	-0.0125318	5.06108	5.46319	5.12777	2.95884	0.217222	5.79078	4.0411	3.45058	3.18741	3.95452	2.11142	6.85699	9.73219	3.67107	0.902741	2.44349	4.14511	0.304029	4.00772	5.72918	4.96927	5.83665	2.68288	3.50328	5.57924	0.416608	0.25364	-0.000553072	1.81055	0.0173814	3.64985	2.77483	3.26711	5.82661	3.88133	4.99327
CGGA_1411	329	1	10.159	2.70033	4.89932	5.37823	3.94259	0.0206438	4.72081	1.29877	0.0781413	0.978654	-0.02705	6.02891	6.37618	6.27317	1.51928	0.439339	5.67509	3.43662	3.84216	3.8394	3.50682	2.43703	6.46545	9.85632	2.11589	2.43697	3.37037	2.74538	2.5013	6.23138	4.97818	5.04994	9.99151	3.06237	4.40652	6.09785	0.250613	0.386049	0.0736356	1.20516	1.03134	4.25173	2.64557	3.91673	5.56578	4.24287	5.04322
CGGA_1902	1479	0	11.1867	2.4671	5.56562	4.78086	5.9405	0.0339544	2.1934	1.85871	0.185121	1.26977	0.0676086	4.20398	5.92486	6.74366	1.95486	0.0508186	6.09793	4.05462	2.98941	3.78828	2.91261	2.57503	7.37898	6.20185	3.84658	0.884543	5.08337	2.4068	1.35662	4.59947	1.8589	6.94844	3.57967	3.17694	3.44066	4.97253	0.439375	0.323715	0.0483933	0.145603	0.121522	4.62375	3.57619	3.75619	5.18858	4.83414	4.97592
CGGA_689	4194	0	11.6321	3.38579	6.71351	3.88494	1.93063	0.00142661	1.56931	0.642189	0.0960748	0.650408	0.00184609	4.20404	5.61537	6.56221	2.98588	0.752612	3.27867	4.98545	4.54449	4.00348	2.17017	2.23931	5.83193	4.62836	3.30447	2.14335	5.48288	0.734061	2.51763	4.93708	1.59895	6.48182	2.4323	2.48464	3.05037	5.82112	0.672202	2.8115	0.162191	-0.0560468	0.59328	3.54251	3.74597	4.16177	4.65042	3.93474	5.91594
CGGA_P159	211	1	9.91648	3.55928	5.95882	5.95588	3.68271	-0.00684111	4.35228	0.816119	0.230734	0.495638	0.0537937	4.89002	6.39544	6.00378	3.68635	0.146052	6.94372	3.38594	4.10142	4.20634	3.7034	3.1575	5.22863	5.4649	5.51906	1.86856	5.20562	3.23831	1.43925	4.87164	3.86733	5.53289	3.4938	3.23718	4.19939	5.62751	0.275766	0.124765	-0.00268873	1.43929	0.134515	3.9769	3.27793	4.34168	5.64707	4.11308	5.02136
CGGA_1528	2497	0	11.8184	2.50719	5.50441	4.86616	5.10442	0.0540532	2.65155	1.18238	0.149839	1.88636	0.248072	4.41931	5.29452	6.50701	1.69075	0.307713	5.3815	4.48463	2.4418	3.52001	2.85508	2.13773	7.67022	9.3577	2.86483	1.9496	3.56988	2.48249	0.978662	4.32556	2.81745	7.17416	4.24669	3.22239	3.80915	4.88755	0.180097	0.805672	0.0145069	0.737387	0.210054	4.69592	2.90032	4.21035	5.4926	5.18881	5.11193
CGGA_1037	780	0	11.8764	1.4581	4.29021	2.97914	5.31419	0.151707	1.39627	0.319722	0.113581	0.879541	0.173528	4.38481	4.7188	5.57366	1.28638	0.132828	4.60323	3.06486	2.69161	4.1338	2.50952	1.6765	9.37843	8.58798	1.9467	1.74108	2.36688	2.1128	2.70005	5.04767	1.70064	7.10725	1.64672	2.60874	3.74306	3.5159	0.262449	0.334566	0.114236	0.863041	0.546521	4.61177	2.31334	4.16412	3.49266	5.88698	3.17285
CGGA_251	1299	0	8.82951	2.23519	5.23441	5.86093	4.43952	0.0301116	2.35266	0.761651	0.378272	1.6172	0.759143	4.00873	4.79115	6.97062	2.30665	0.332556	4.88372	2.93722	3.53914	3.19747	2.32511	2.87382	6.43313	8.14771	3.33993	2.9343	5.63455	2.20638	3.30777	6.23071	2.97839	4.91765	3.73892	3.07861	3.77937	5.3694	0.600263	1.44281	0.320363	0.497505	0.632639	4.24551	2.89052	3.93639	4.37239	3.69861	4.88347
CGGA_901	929	1	10.1665	3.87593	6.26512	5.34449	3.46119	-0.00684111	3.44983	0.750245	0.149839	2.12695	0.198815	4.66972	6.37471	6.22613	3.09675	0.132828	6.56883	4.8466	3.95682	4.05454	3.76415	3.04567	5.59093	4.56915	3.58527	0.635466	3.82333	2.98717	1.02697	4.08538	4.44888	5.50723	5.7498	2.98051	3.25814	5.6158	0.365964	0.438608	0.0315332	0.774396	0.246358	4.39726	3.77514	5.10672	5.11605	4.41541	5.23548
CGGA_D45	856	0	11.7697	3.03759	6.66476	3.6984	3.51729	0.0939191	0.72025	1.50669	0.424119	1.81336	0.92194	4.13727	5.55543	7.25566	2.97637	0.46989	3.41466	5.3491	3.01446	3.27459	2.43646	2.53555	6.46545	4.75358	3.49843	2.57972	4.4779	0.474503	2.01725	4.31178	1.84947	6.60765	5.55855	2.91116	3.44324	6.15798	1.25906	0.600218	0.152698	0.30412	0.840926	4.1423	3.77225	4.04781	4.10621	3.96972	4.78978
CGGA_1032	643	1	7.11418	1.87951	3.71721	1.43055	2.87527	-0.00684111	3.39511	0.989958	0.0379116	0.912212	0.108262	3.93608	3.6464	2.32628	0.992491	0.146052	2.90677	3.40002	1.7246	2.57782	1.17034	1.01468	3.80409	5.90869	2.32648	0.254356	3.77495	4.07761	1.26297	2.27771	3.28469	3.97084	3.91709	1.32293	4.21872	3.42352	0.509522	0.162035	-0.00268873	1.8077	0.013027	3.18406	1.67276	2.90746	2.64964	2.21001	3.66998
CGGA_P501	926	0	10.6704	3.27773	6.04247	5.99562	3.4454	-0.00684111	4.78252	0.98283	0.920566	0.302145	0.0398427	4.29826	6.25887	6.9338	3.23104	0.319426	7.21131	4.80705	3.81684	3.85817	4.45315	3.1575	5.91038	8.6048	4.1714	0.51979	3.87906	3.27274	0.716049	4.49917	3.33243	5.67679	4.96211	3.29469	3.84805	6.45106	0.108028	0.19832	0.0145069	0.92206	0.108408	3.87258	3.83783	3.17784	6.08372	3.48641	5.23439
CGGA_1738	469	1	11.2026	2.17059	5.69762	5.2348	4.91615	0.0339544	3.15028	0.481718	0.0248644	0.928283	0.0398427	4.45468	5.81422	6.02074	2.24867	0.222934	6.1883	4.10962	2.33375	3.66211	3.07127	2.27092	7.10358	8.67784	3.43759	2.2357	3.54608	4.05136	1.47876	4.73218	3.41453	6.83003	4.08681	2.89101	3.44571	4.60301	0.662003	0.836009	0.0483933	0.913772	0.0683177	4.52791	3.40946	4.31342	5.26176	5.31989	5.24527
CGGA_856	1297	0	9.95399	2.2162	5.82402	4.80602	4.24696	0.0670851	2.22359	1.10055	0.408956	0.849834	0.00184609	3.89862	4.69348	6.51961	1.28035	0.217222	4.04413	4.61046	2.51455	3.83819	2.45928	2.60662	6.51797	8.43094	2.79371	0.959354	5.23578	1.53165	1.10598	4.08083	0.777669	5.64967	2.75178	3.2135	3.47352	5.49066	0.317886	0.847944	0.0736356	0.915776	0.170135	4.32757	3.47894	3.33825	5.29463	5.0155	5.18743
CGGA_2046	251	1	10.168	2.98598	5.71812	5.77926	3.44222	-0.00684111	5.02651	1.69625	0.125779	0.695218	0.0537937	5.23301	6.65048	6.54467	2.96806	0.210403	6.94961	5.75293	3.20869	4.11344	4.28876	2.9859	6.57916	8.78937	3.46261	2.44063	4.40218	3.50303	0.950267	4.77705	3.76864	5.78991	7.07958	3.05056	4.42834	6.13276	0.108028	0.162035	0.355063	0.650545	0.0951706	3.97535	3.51068	3.25444	6.10378	4.05592	5.43217
CGGA_1700	2076	0	11.4163	1.9598	5.31032	4.28688	5.23977	0.0540532	2.67201	1.35713	0.252958	0.70453	0.0398427	4.70033	5.3444	6.37709	1.67966	0.235356	5.38629	4.18699	2.76523	3.67209	2.57298	2.12661	7.74355	7.46929	2.74202	1.9659	2.83401	3.04662	2.1524	4.94467	3.48376	6.53025	5.22658	2.84578	3.9576	4.62685	0.565686	0.23367	0.0483933	0.482241	0.3276	4.484	3.19126	3.99999	4.94504	4.76399	4.8884
CGGA_1198	3066	0	6.81787	1.39917	3.47876	3.35194	1.29217	0.0540532	1.28506	0.894351	0.0508303	0.326253	0.0398427	2.27662	2.40101	2.43898	0.874339	0.0648166	2.29908	2.87657	1.06869	1.99523	0.89241	0.626171	2.36435	2.80573	2.01147	0.609623	2.70168	0.860874	1.08017	2.07351	1.01705	3.34408	1.88007	1.51954	2.82294	2.96963	0.22181	0.00647017	0.603299	0.436975	0.0270543	2.01754	1.18904	2.41894	1.86274	2.38957	2.66206
CGGA_1680	596	1	10.5436	2.33872	5.56623	4.76138	5.46505	0.170694	3.56573	0.95395	0.208125	1.257	0.397264	4.84724	5.62207	5.69181	2.23053	0.259883	6.53797	5.01007	3.10278	4.19823	3.19354	1.7434	6.82975	7.29153	3.15476	1.18971	2.52394	3.24778	0.935844	3.56765	5.91964	6.44928	6.11167	3.04715	3.49154	4.7292	0.713077	0.033653	0.0980086	2.20578	0.121522	4.97018	2.80529	4.58886	4.28394	5.15991	4.29718
CGGA_643	331	1	10.6307	3.05274	6.61854	2.74935	6.31378	0.0761125	2.38164	2.09755	0.527109	2.22162	0.92194	3.75965	6.72649	6.80603	1.84798	0.168372	7.0815	2.54524	2.73236	3.14318	4.4831	3.39528	7.81785	3.66216	3.8999	3.02247	4.71525	3.78339	2.14395	4.52696	2.09184	6.55986	3.02761	3.6562	2.5839	4.89413	0.51588	0.398716	0.113879	0.313977	0.170135	5.28244	4.39167	4.59228	4.30269	5.88043	5.91723
CGGA_314	2568	1	8.45325	2.95636	5.65625	5.83473	2.9908	0.00142661	3.39546	0.847518	0.200367	0.856936	0.00184609	3.95623	4.23001	6.34616	2.28202	0.217222	5.29525	4.13601	3.20227	3.8394	3.20012	2.87382	5.03987	9.8722	3.89667	0.902741	5.98133	1.75902	1.69916	4.06133	2.42986	5.35374	3.17807	2.59143	3.71014	5.83079	0.136747	0.460614	-0.000553072	-0.0432277	0.00269431	3.46564	3.44154	3.07009	5.69415	3.72554	4.59473
CGGA_1627	2301	0	11.2643	2.44658	5.62344	5.28858	5.26118	0.0339544	3.39685	0.175204	0.125779	1.53164	0.173528	4.20829	5.79431	6.72371	2.01225	0.159155	6.12791	3.91939	2.71342	3.50002	3.13476	2.65161	7.05124	6.22681	2.51104	2.51432	2.52394	3.21433	2.66177	5.36577	4.6415	6.22369	4.65297	2.96055	3.5476	5.26813	0.262449	0.487813	-0.00268873	0.342035	0.197742	4.69592	3.3454	4.34702	5.20869	4.72973	5.28015
CGGA_1703	1592	0	11.7376	2.09895	5.55349	4.87636	5.67191	0.0540532	3.00652	0.0282841	0.101269	1.15754	0.0676086	4.91005	6.18016	6.60264	1.87581	0.146052	6.10518	3.85989	2.56331	3.54093	2.95099	2.18486	7.24135	7.23164	3.54193	0.781079	2.90472	4.69253	1.23416	4.35398	3.74685	6.79548	5.04743	3.009	4.02735	4.7858	0.235473	0.221988	0.0483933	0.471055	0.23436	4.6062	3.17883	3.8834	5.30424	4.72548	4.97322
CGGA_1055	1611	1	11.3862	3.88268	6.15963	6.16305	3.58386	-0.00684111	4.28407	0.855779	0.196674	1.17119	0.0537937	3.73581	6.17676	6.68156	3.406	0.319426	6.94846	2.98924	3.79615	4.22821	4.27902	3.19055	5.43506	6.69434	3.70883	0.933492	5.52558	2.42398	1.15007	4.06585	3.34539	5.41622	5.23603	3.64179	3.40348	6.18931	0.327937	0.149724	0.146239	1.16526	0.0270543	4.11261	3.80687	4.1716	5.44995	4.31011	5.57493
CGGA_1598	564	1	11.0254	2.89977	5.41958	4.59971	5.19748	0.226628	4.13073	1.3406	0.0248644	0.811975	0.0676086	4.86838	6.24408	6.4453	1.88059	0.0648166	6.07019	5.13817	3.52579	3.80934	3.53706	2.46242	7.50518	7.99006	3.28534	4.73254	4.27335	4.20982	0.562953	4.11124	3.3823	6.44615	5.06471	3.08915	3.90573	5.14247	0.598449	0.186331	0.19316	2.78371	0.185321	4.73886	2.76691	4.40379	5.57681	4.92188	5.16624
CGGA_1829	801	0	10.322	2.35469	5.4645	5.18052	4.51577	0.170694	2.12681	0.440309	0.149839	0.70453	0.0398427	4.60618	5.48699	6.40379	2.15916	0.565379	6.36985	2.39677	3.80031	3.19042	2.91909	3.0011	7.0877	7.63297	2.98373	3.54278	4.10617	1.994	3.15523	6.55725	3.94777	5.57757	4.40106	3.15673	3.60815	4.27982	0.630546	0.758871	0.0650905	1.06377	0.456826	4.33854	3.29514	4.44122	5.07461	4.11928	5.25031
CGGA_1497	1178	1	10.9004	4.74641	6.72601	5.3627	2.81797	0.0540532	2.6691	0.672253	0.063623	2.30259	0.542092	3.98992	6.35365	6.44147	4.08515	0.0786793	6.87734	6.27121	3.21849	3.64756	4.70373	3.20353	5.54951	6.38516	4.84244	2.02922	4.33843	3.13471	2.00516	4.00724	2.12829	5.60657	3.38966	3.35105	3.79268	5.36786	0.509522	0.00647017	0.340955	0.117313	0.0683177	4.25233	3.60438	5.10011	5.70211	4.40175	5.66826
CGGA_1566	2420	0	12.6506	1.76397	5.71973	3.72907	3.83854	-0.00684111	0.866528	2.846	0.0248644	1.59436	0.0257529	4.16898	5.84339	6.82159	2.16686	0.146052	5.19379	5.16773	2.65945	4.18035	2.75393	2.31672	7.96676	6.40134	2.51688	1.7102	3.48254	0.825424	0.514446	3.76075	0.964378	7.30271	1.82874	3.32112	3.28678	4.63893	0.692845	0.998522	-0.00268873	0.61024	0.160147	4.31755	2.98141	3.75151	5.0932	5.34512	4.68361
CGGA_1443	2665	0	11.0948	2.34193	4.87412	5.3627	4.94162	-0.00684111	3.49441	1.84716	0.196674	1.31364	0.0948405	5.97494	6.37908	6.34334	1.74484	0.376596	6.20787	4.10381	3.32171	4.12052	3.57391	2.04592	7.12858	10.6549	2.99815	1.32014	2.6197	3.90721	0.504534	4.632	6.5552	6.71097	9.28445	2.8617	4.18197	5.21579	0.22181	0.00647017	0.146239	3.45959	0.210054	4.84182	3.00851	3.69494	5.29319	4.52909	4.71456
CGGA_P86	1694	0	10.3929	3.62331	6.36056	5.14975	2.25417	0.0136576	2.60669	0.440309	0.274813	1.257	0.0948405	4.26371	5.63564	6.71784	3.90292	0.235356	5.73557	5.28895	3.83923	4.09517	3.62852	3.49432	5.80608	6.62561	5.02332	1.62983	5.71704	1.38056	1.29119	4.27774	2.30258	5.76012	2.90828	3.28764	3.73901	6.12222	0.194125	0.790248	0.0483933	0.547632	0.121522	4.07667	4.10417	3.9734	5.44938	3.72523	5.45735
CGGA_1673	2160	0	10.3826	2.88096	5.95904	5.10537	3.28307	0.0339544	1.8449	0.136631	0.208125	1.30745	0.108262	4.32798	5.82269	6.46065	2.36254	0.319426	6.24517	3.99818	3.39479	3.48482	3.41832	3.02914	6.4193	5.61031	3.69905	2.74401	3.58781	2.26756	3.24869	5.58578	3.71103	5.43377	3.29474	2.99661	3.06218	4.99997	0.00125961	0.608058	0.297928	0.493344	0.477258	4.52742	3.71837	4.63756	4.91607	4.20489	4.93387
CGGA_603	168	0	12.209	3.53417	5.31682	4.20002	3.62539	0.00142661	5.57191	0.967809	0.113846	1.02936	-0.02705	4.64543	6.08874	7.68079	3.90198	0.117809	6.12999	3.77085	3.84335	3.98902	4.0478	3.10617	5.57776	5.6362	2.0181	0.834094	6.84962	3.78139	1.73592	4.33418	4.99386	5.34183	4.35272	2.56874	3.57125	6.57593	0.416608	0.32119	0.812991	2.07794	0.59328	4.33769	3.48089	3.42056	4.28932	4.42638	4.71267
CGGA_1524	1004	1	11.3019	2.20674	5.83532	5.20087	3.93334	0.132543	2.24529	1.57023	0.0248644	0.484923	0.0398427	4.53379	5.78948	6.79255	2.27367	0.0924094	5.90306	4.38891	2.99135	3.41012	2.79487	2.84672	6.71721	7.25395	3.17291	1.65444	4.74662	1.41035	1.91279	5.37175	3.36079	6.27619	5.53274	3.32661	3.46199	5.38059	0.520916	0.599174	0.130311	0.159547	0.210054	4.577	3.25019	4.03964	5.61383	4.38406	5.42719
CGGA_1670	365	1	10.7999	2.82063	5.64743	5.29727	4.5989	0.0540532	3.0649	2.80351	0.185121	1.17119	0.38633	4.54816	6.05984	6.65439	2.32227	0.17214	7.14103	4.11954	2.85874	3.25876	4.23156	2.26089	6.78983	7.74037	3.80749	0.635466	4.2826	2.32677	0.600554	3.64198	4.09469	6.62509	4.37034	3.64925	3.54175	5.3493	0.378439	0.345333	0.177661	0.718527	0.3276	4.47056	3.86442	3.75151	5.94329	4.98052	5.43093
CGGA_598	3677	1	10.1454	2.90257	5.90832	5.04264	3.08399	0.00142661	2.72964	1.06484	0.0600425	0.978654	-0.0565184	3.86203	4.57476	6.5712	2.48122	0.264469	4.16408	4.77653	3.02506	3.88349	2.79479	3.01155	6.19329	7.88535	2.6796	1.52512	5.13341	1.05122	1.6724	3.92141	2.06185	5.9848	2.96582	3.09244	3.19388	5.81011	0.230687	0.633326	0.0838358	-0.108562	0.0606021	3.98494	3.5673	3.9228	5.12765	4.08519	4.42205
CGGA_1455	2655	0	6.4752	1.96412	3.60288	4.18956	1.34727	-0.00684111	1.83447	1.15103	0.0248644	0.3617	0.0257529	2.15049	2.71486	2.37765	1.31613	0.331044	3.26007	3.15674	1.10239	1.74724	1.20326	0.874974	2.3764	5.76195	2.15545	0.482146	4.14917	0.798231	1.02697	2.42439	0.693003	3.58178	1.1115	2.49259	3.15436	3.31252	0.262449	0.0201289	-0.00268873	0.0884677	0.0270543	1.88518	1.46613	3.28708	2.35464	2.36228	3.03297
CGGA_1440	2670	0	10.4613	2.62813	5.76898	5.2275	4.10366	-0.00684111	3.0111	0.364776	0.933744	1.3977	0.08129	4.62444	5.51535	6.53661	2.43329	0.210403	5.52897	4.62089	3.05197	3.89968	3.04614	2.92922	6.5494	8.28061	3.22074	2.30578	5.20475	1.82527	1.84381	4.81898	4.02053	5.90295	3.43878	3.11046	3.12912	5.45718	0.275766	0.377134	0.0483933	0.0884677	0.108408	4.38005	3.43394	4.38954	5.7	4.37006	5.01528
CGGA_1321	702	1	11.4658	3.71317	6.62644	5.18014	3.46745	0.0739577	3.40899	0.375817	0.230734	1.992	0.618652	4.54099	6.68061	7.01296	2.59782	0.119482	6.67919	5.97036	2.99715	4.26316	4.14031	2.57503	5.6629	6.63425	4.10469	0.765641	4.22708	4.69698	1.12507	4.58749	2.68037	5.94929	4.29571	3.4242	3.40218	5.30462	0.249019	0.0864553	0.177661	0.102961	0.054697	4.70926	3.38316	4.80841	5.59226	5.0455	5.4365
CGGA_P157	470	1	9.63487	3.95288	6.22239	5.47816	4.50836	0.0339544	5.0939	0.461166	0.0508303	1.02124	0.108262	4.4428	6.07239	5.96416	3.6995	0.259883	6.61306	5.00065	3.70208	4.29859	4.07861	3.43768	5.97092	8.15825	5.80363	1.91641	4.85227	2.67575	1.35129	4.73525	3.63326	5.47868	3.75258	2.76733	4.49078	5.56015	0.403096	0.162035	0.19316	0.117313	0.147389	4.15494	3.58075	4.06493	5.66986	4.01109	5.30689
CGGA_1204	3056	0	10.5416	3.62684	6.10998	5.14312	2.78834	0.0136576	1.81336	0.879049	0.0762921	1.56333	0.0948405	4.07385	5.73188	6.75535	3.51452	0.259883	5.70062	5.33837	3.80031	4.10235	3.55034	3.38406	6.20204	7.04897	3.56918	2.72921	5.47435	1.19391	2.00516	4.26679	1.88995	5.78745	2.52399	3.37502	3.37855	6.0516	0.609221	0.438608	0.0315332	0.0738302	0.197742	4.05938	3.12783	4.15866	5.67082	4.10894	5.41089
CGGA_P568	218	1	11.0938	3.06494	6.20066	5.99284	3.11659	0.0739577	1.97399	3.30191	0.538924	0.227398	0.0257529	3.86495	6.44255	7.07071	2.66246	0.0924094	6.52829	5.58718	3.02768	3.53481	4.22139	3.7569	5.97125	4.94391	3.86734	2.20882	3.86674	2.43532	0.514446	4.42211	1.97541	6.54826	4.3	3.14572	3.60926	5.99346	0.390816	0.345333	0.081628	0.0738302	0.147389	3.48502	4.00833	3.39647	5.65171	5.26148	4.83918
CGGA_1565	1417	0	10.9315	2.35786	5.54708	5.37512	5.64835	0.0936718	3.55798	0.832117	0.0508303	4.08252	1.34571	4.51305	5.82938	6.72078	1.83194	0.0924094	6.39794	3.95611	2.52498	3.71126	2.9964	2.244	6.77369	8.65273	4.02201	0.482146	2.98892	2.51484	0.741367	4.79867	4.16495	6.33687	5.19507	2.93468	3.25524	5.07037	0.327937	0.0603081	0.0315332	0.117313	0.0270543	4.45014	3.19281	3.59938	5.71306	4.21129	5.11955
CGGA_1097	1378	1	10.5168	2.71008	5.49359	5.29623	4.98405	0.113199	3.59176	0.364776	0.0508303	1.36822	0.08129	4.58126	4.50934	5.86578	2.41437	0.0508186	6.67815	4.42157	2.46819	3.68309	3.38872	2.55114	6.60058	5.39692	4.40907	2.47462	3.62167	3.03383	1.51241	4.31571	4.13814	5.89339	4.03104	3.10394	3.21549	4.50515	0.662003	0.0993445	0.146239	1.58846	0.487363	4.53926	3.89755	4.62806	5.32479	4.72463	5.3524
CGGA_642	4249	0	11.1362	3.2549	5.74211	5.48362	3.50036	0.00142661	3.62371	0.108759	0.49823	1.4517	0.0301918	3.36691	5.34115	5.71904	2.90855	0.241039	5.68947	2.68413	2.68312	2.54625	3.45046	2.51863	4.88312	7.38715	2.48458	1.16791	3.74046	2.7589	2.13987	4.36395	2.76885	5.44893	3.22378	2.38528	3.46299	5.32194	0.336442	0.633326	0.042453	0.0191223	0.0747375	3.61526	3.22003	4.36046	4.05614	3.99737	4.66706
CGGA_1317	2864	0	6.67228	2.47868	4.26936	3.06594	1.7275	-0.00684111	1.27733	0.551377	0.063623	1.30745	0.0398427	3.16318	3.31331	2.8141	1.22479	0.197762	2.75857	3.79451	2.4418	2.4497	1.11933	1.29161	3.48823	5.70219	3.37374	1.43925	5.12546	1.18006	2.07292	3.49282	1.75267	4.15831	1.21685	1.48492	3.50366	3.91789	0.415282	0.0993445	0.0980086	0.117313	0.013027	2.56442	1.61478	3.8093	2.69665	2.72022	3.85749
CGGA_1305	2702	1	11.8206	1.98124	4.56033	4.77037	4.95614	0.281083	2.85421	0.724725	0.0248644	1.41511	0.0948405	4.31287	5.90822	6.16794	1.64582	0.159155	6.0946	4.88971	2.60576	4.24972	3.32268	2.0138	7.33939	6.8267	2.53713	1.30973	1.84459	2.10209	0.64614	3.81267	3.50454	7.09844	5.03407	2.90255	3.38252	4.68293	1.03886	0.356015	0.0483933	0.131526	0.382891	4.77671	3.25166	4.20375	4.7184	5.13741	4.56213
CGGA_P308	563	1	10.6288	2.28955	5.39046	4.78555	4.10047	0.0339544	2.20151	0.707451	0.101269	0.920269	0.0398427	4.71054	5.58767	6.40584	1.95937	0.431575	5.92402	2.61098	2.94395	3.03845	2.8641	2.62152	7.54821	8.18172	3.30184	3.34632	3.01591	1.59761	3.10893	6.26592	3.31934	5.64734	3.66072	2.94213	3.48176	4.65553	0.180097	0.544623	-0.00268873	0.317311	0.467079	4.44484	3.14399	4.17904	5.16958	4.58065	4.95507
CGGA_1608	1953	0	10.664	2.66603	5.76203	4.96196	6.69089	0.24494	4.02629	1.8316	0.137864	0.99854	0.0537937	4.96914	5.8087	6.45898	2.15142	0.50517	5.87256	4.38011	3.73639	3.80934	3.23298	2.70263	6.74052	7.82334	3.89632	3.15844	3.92512	3.02832	3.11186	5.92094	4.98256	5.89677	5.72921	3.37766	3.79463	5.13616	0.378439	0.998522	0.146239	0.930301	0.94724	4.61269	3.30648	4.64228	5.52005	4.29107	5.52993
CGGA_1079	471	1	10.3161	2.46865	4.11532	5.68637	6.27089	0.0670851	3.95395	0.796585	0.0960748	0.213021	0.0160864	3.72495	4.88949	4.54032	1.17687	0.397571	7.90114	3.62593	3.1795	3.64303	3.18988	2.25032	6.76395	6.28499	5.34785	0.793523	2.10423	2.30458	1.7255	4.40822	3.40199	6.8754	3.40483	3.91539	3.22189	4.3122	0.622296	0.334371	0.143121	2.25483	0.356226	4.36187	4.2997	3.57436	5.20532	4.22879	5.77714
CGGA_607	1389	0	8.66914	3.49875	5.35924	6.46325	3.7152	0.00142661	4.51246	0.632597	-0.0715466	0.925933	-0.02705	2.9775	5.35619	5.98147	2.91347	0.0654063	6.37931	3.71545	2.97514	3.98118	3.90159	2.97645	4.90031	6.07866	2.7014	0.654191	3.46719	1.81633	1.36516	3.19347	2.79673	5.8408	3.65399	2.73401	3.58959	6.08251	0.416608	0.168696	-0.000553072	-0.0689875	-0.0271169	4.1316	3.54645	3.57793	4.78338	3.49123	5.05312
CGGA_1061	532	1	10.9363	3.60488	6.74354	5.66412	2.45325	0.210179	3.26617	0.543405	0.0781413	0.985099	-0.0417113	3.72775	6.64032	6.42515	3.26129	0.0384726	7.7013	5.50217	3.12816	3.76194	4.18923	3.26158	4.42052	6.20253	2.78581	0.608796	3.38167	1.83381	1.29899	3.24241	2.82666	5.62075	2.92578	3.20034	3.75277	5.64433	0.345615	-0.0157711	0.052946	-0.017945	0.129988	4.67485	3.92779	4.45202	4.97466	4.21779	4.48053
CGGA_P153	1484	0	6.0106	1.28721	2.78186	4.14357	2.19687	-0.00684111	1.80269	0.741789	0.125779	0.277643	0.0537937	1.92372	2.8583	2.13254	1.21688	0.247672	3.3442	2.73777	0.89544	1.69845	1.12797	0.707102	2.09462	4.71736	2.51979	0.635466	2.19381	0.751694	0.868985	2.74843	1.10966	3.2795	1.40695	1.92942	2.91186	2.85496	0.302067	0.210205	0.0483933	0.0738302	0.013027	1.89362	1.37166	2.6925	2.18162	1.95958	2.74186
CGGA_P337	689	1	10.9515	3.10266	5.76538	5.1102	2.73983	0.0136576	4.4739	1.87776	0.0888399	0.803311	0.121558	5.06585	5.6601	7.173	3.97619	0.17214	6.21735	5.30001	3.92416	4.37317	3.3399	3.184	6.01575	7.10104	2.67362	1.3356	5.08384	3.36976	1.25726	4.87072	3.62596	5.8329	6.07875	3.05056	4.19505	6.25658	0.108028	1.68633	0.0315332	1.49632	0.23436	3.80135	3.8443	3.98049	5.75321	3.432	5.38021
CGGA_1630	2160	0	11.8844	1.50829	4.89532	4.16848	5.2891	-0.00684111	2.83881	0.975665	0.0508303	1.08736	0.0257529	4.48334	4.879	5.84851	1.38765	0.0786793	4.17292	3.49728	2.19455	2.74475	2.38874	1.99331	8.6828	9.87225	2.14401	1.361	3.22213	2.48793	1.69024	4.69788	2.94698	7.01263	3.21514	2.70625	3.52046	4.15698	0.262449	0.323715	0.0145069	0.253619	0.281751	4.74469	2.49767	3.65615	4.52917	5.558	3.97135
CGGA_1239	2997	0	11.0011	3.12198	5.83653	5.45028	4.817	0.0339544	3.12098	1.05254	0.0762921	1.15754	0.0398427	4.14208	5.58109	6.63122	2.43016	0.106009	5.82794	5.19628	2.85444	3.82123	3.14203	2.91111	6.41142	8.15655	2.94381	2.51432	5.38447	1.41035	0.999577	4.00545	2.72628	6.02749	4.08282	3.17231	3.36658	5.38802	0.403096	0.0603081	0.177661	0.131526	0.246358	4.38228	3.58867	4.51403	5.56849	4.5706	5.39405
CGGA_871	3964	0	9.36252	2.6648	5.93311	4.44875	3.6391	0.0761125	2.67964	0.583697	0.166214	1.41038	0.356626	3.84484	4.28723	6.43253	2.96044	0.180741	3.64111	4.28859	3.13319	3.7707	2.2807	2.83221	5.93408	7.79723	3.70771	2.20045	4.5919	1.61385	2.30655	4.27682	2.06185	5.63524	3.51892	2.51105	3.51064	5.62516	0.679167	0.411285	0.199365	0.284189	0.308807	3.93995	3.43955	4.27886	4.32324	3.80834	4.68537
CGGA_P145	308	1	10.3376	2.56505	5.17767	6.1278	4.37183	-0.00684111	3.02474	0.863578	0.0762921	1.23112	0.0398427	4.86838	5.23247	6.26816	1.95937	0.132828	6.07082	2.74005	2.98941	3.5113	2.95728	2.46529	6.4719	10.3593	3.56242	2.21153	4.19892	2.10924	1.80222	5.34671	4.24557	5.90183	4.02897	2.8735	3.33959	5.30027	0.249019	0.710418	-0.00268873	0.436975	0.0951706	4.2616	3.36172	3.98676	5.83756	4.15516	4.95827
CGGA_1148	596	1	9.9025	3.37577	4.82576	5.34582	5.06312	0.189508	3.57957	1.42138	0.966122	1.02874	0.418883	4.53712	5.2127	5.73126	2.56143	0.0786793	7.47652	2.59331	3.3805	3.91629	3.44296	2.74711	5.56347	3.93679	3.57457	0.773381	2.31039	3.15168	0.524287	3.41766	4.17052	5.54365	5.36516	2.70177	3.42668	5.18053	0.554612	0.00647017	0.297928	2.12048	0.0818081	4.51345	3.43394	4.11477	5.52412	4.46075	5.0896
CGGA_1292	2901	0	10.8076	3.77882	5.23208	4.18295	3.77806	0.00142661	3.37766	0.752789	0.408956	3.21459	0.138465	2.22483	5.02811	7.25504	2.43587	0.0110258	5.89926	1.62649	5.83546	2.26288	3.26197	3.72129	7.33315	6.16424	3.52899	2.99096	5.87022	3.75723	3.38488	5.80701	5.1647	4.41999	2.94994	3.64523	3.14736	5.87764	-0.000993783	0.0323424	0.0838358	1.67978	0.0319266	4.22886	0.806539	4.38737	3.3122	2.78727	4.65602
CGGA_1447	308	1	5.97016	1.91582	2.99923	5.12061	2.48785	-0.00684111	1.7702	1.40028	0.063623	0.568561	0.0257529	2.33376	3.07586	2.51251	1.27125	0.53559	3.64528	1.286	1.44407	1.58969	1.17865	0.951363	2.39722	5.60583	2.72711	0.863018	3.27273	1.15196	1.3243	3.21073	1.18331	2.73976	2.09282	2.7306	3.55459	3.13962	0.032509	0.112114	-0.00268873	0.0738302	0.0818081	2.09849	1.09493	2.65366	2.40384	1.88938	2.69975
CGGA_1004	899	1	11.0227	1.87289	4.8292	4.61802	6.18388	0.120031	5.19771	0.300262	0.347102	0.564931	-0.02705	5.21648	6.67478	4.27175	0.703673	0.287524	7.44522	4.38073	3.05479	3.14318	3.16778	1.76289	6.34884	5.87132	4.02487	0.751912	0.895353	4.3059	1.05206	3.93083	6.58879	5.52856	5.0893	3.23093	3.89009	4.14573	0.200174	0.0790745	-0.000553072	0.0903677	-0.0271169	5.32393	2.68584	4.18865	4.11513	3.58797	4.83211
CGGA_P399	1090	0	10.9308	3.23217	5.94592	5.11582	4.01077	0.0339544	2.99501	1.04572	0.113581	0.975486	0.08129	4.45882	5.55904	6.67587	2.87986	0.259883	5.68422	5.49647	3.42984	4.14463	3.2296	2.92922	6.31939	6.48356	3.28201	2.47238	4.44463	1.35625	1.79837	4.82711	3.49995	6.11986	3.61181	3.47154	3.54526	5.57206	0.651587	0.366615	0.0650905	0.131526	0.349977	4.56647	3.20816	4.84963	5.7112	4.42784	5.41719
CGGA_791	252	1	8.66374	3.20954	5.76783	4.80959	3.77593	0.0850566	3.66045	1.07923	0.148913	0.608359	-0.02705	4.35125	6.28492	6.05301	2.91838	0.180741	6.68533	3.56191	2.85824	3.61078	3.56788	3.14471	5.73825	6.84208	3.34558	1.64491	4.00442	3.41742	1.95921	5.30284	3.24429	4.52141	3.63523	3.20693	3.94232	5.24387	0.158259	0.139367	0.0211608	1.26028	0.14349	4.34779	2.68584	4.579	5.08129	4.37063	3.45065
CGGA_1184	156	1	10.4017	2.54605	5.76461	4.78919	3.98315	0.0540532	2.70641	0.461166	0.208125	0.803311	0.0537937	4.71682	5.7093	6.66275	1.99047	0.365343	5.92856	2.41428	3.3848	2.97613	2.66793	2.67858	7.14331	8.28234	3.88244	3.98703	3.94122	1.97841	3.57547	6.81203	3.94612	5.52961	2.98493	2.94583	3.49397	4.91203	0.275766	0.668692	0.340955	1.07125	0.718987	4.42074	3.36442	4.75378	5.31102	4.76728	5.3998
CGGA_825	836	1	11.3535	3.20304	5.92384	6.13048	3.5413	-0.00684111	3.5872	1.03198	0.101269	2.30577	0.865911	4.79937	6.97924	6.57034	2.27013	0.132828	7.22938	5.46361	2.79038	4.02533	4.22296	2.86994	6.16861	8.62656	4.25148	1.55761	3.17883	3.62464	1.25152	4.21901	4.38053	5.58386	4.59259	2.83976	3.13706	5.07037	0.262449	0.0734439	0.0145069	0.837004	0.185321	4.41695	3.50827	3.9852	5.82513	4.46494	5.12752
CGGA_D11	827	1	10.9685	3.07153	5.81184	4.3591	4.80664	0.00142661	4.19314	2.54854	-0.0330414	0.978654	-0.0417113	5.64737	7.25479	4.3551	3.97526	0.0110258	6.09239	5.26664	1.48805	3.11371	3.56665	2.00647	5.99713	6.64413	3.81807	2.58994	2.46624	3.79333	0.904848	3.9151	4.24632	6.86622	5.03582	1.40752	3.91117	3.97398	0.14755	0.0790745	0.042453	-0.00547709	-0.0121375	4.09496	2.53216	4.47081	4.22058	5.1302	4.97731
CGGA_245	318	1	11.3399	2.11881	6.01081	4.57319	4.51535	0.00142661	4.05616	0.928767	0.283236	1.01057	0.0301918	5.01694	6.49391	5.70681	2.37016	0.130617	6.4252	5.09068	2.50552	4.75223	3.30686	2.50157	5.641	7.49984	2.47505	0.844081	3.76286	2.59695	0.554031	3.56434	4.9249	6.98451	5.71753	1.68092	3.60634	5.43457	0.45896	0.1095	0.0211608	0.212047	0.0606021	4.50742	3.57861	3.95736	5.51198	4.72836	5.50493
CGGA_1649	2225	0	13.074	1.21191	5.19032	2.66159	4.49717	0.0339544	1.82922	0.77531	0.317458	0.895966	0.272073	4.43201	5.11377	5.71889	1.3946	0.146052	3.20418	3.35589	2.24378	4.51827	2.38549	1.51345	8.59327	6.06432	1.99449	1.80448	1.35958	2.05096	0.655078	3.24651	1.33697	7.22406	2.10855	2.29251	3.69991	3.69112	0.302067	0.356015	-0.00268873	1.15824	0.258255	4.4202	2.28829	4.4636	3.25909	6.22788	3.13132
CGGA_1369	360	0	12.6336	2.23145	5.65025	4.33843	3.97264	0.0136576	3.01794	0.799937	0.0379116	0.944184	0.08129	4.15111	5.97945	6.45989	1.81698	0.0366828	6.24997	4.24524	2.69406	4.22096	3.343	2.15242	7.71348	7.83582	2.27529	1.42971	2.46745	2.66622	0.891638	4.41362	2.41853	7.35361	3.2913	2.96603	3.64669	4.63357	0.137252	0.301752	0.0145069	0.131526	0.197742	4.54759	3.00851	3.81289	5.00515	5.29549	4.51272
CGGA_1716	951	1	9.6415	3.75424	5.7977	5.13211	4.44361	0.0540532	4.50054	0.386773	0.274813	1.82183	0.134731	5.08043	6.33891	6.51845	3.52271	1.87217	6.93377	5.0446	3.90512	4.57997	4.49642	3.34414	5.31644	7.62867	4.27663	1.8755	4.36633	3.33176	3.20961	5.18798	5.14089	5.04174	5.27761	3.55208	3.5476	6.02522	0.702994	0.23367	0.208522	2.43255	0.436094	4.50337	3.63739	4.80717	5.32447	4.26136	5.39501
CGGA_1404	2741	0	11.0841	2.4987	5.65335	5.19225	4.56514	0.0739577	2.52218	1.09276	0.0762921	0.537743	0.0398427	4.70763	5.44241	6.83413	1.92289	0.0924094	6.09084	4.31898	3.19881	3.41818	2.69894	2.61644	7.49992	8.52033	3.55699	2.16186	4.89088	1.47374	2.09168	5.55232	3.24495	6.55821	3.45119	3.2605	3.55923	5.17485	0.651587	0.221988	0.0315332	0.187044	0.612541	4.59779	3.56704	3.84732	5.73489	4.64657	5.20974
CGGA_1620	2312	0	10.6579	2.06356	5.50251	4.94053	4.43577	0.0739577	1.89092	0.364776	0.173465	0.588759	0.0257529	4.65007	5.08594	6.38274	1.79167	0.555518	5.58101	3.40561	2.75829	3.04915	2.45209	2.40069	7.20312	8.56731	3.3149	2.81043	3.70482	1.34394	3.2802	5.95368	3.60595	5.99378	3.15383	2.92344	3.12752	4.63626	0.94625	0.497446	0.0483933	0.159547	0.23436	4.53681	3.12945	4.34108	5.17103	4.69146	5.10951
CGGA_580	1394	1	11.7575	2.82881	6.19484	5.03739	4.0639	0.0301116	3.18874	0.393268	0.0417754	1.5849	0.43352	3.63946	5.85383	7.01107	2.18741	0.143312	6.14102	4.63639	2.80802	3.9643	3.61526	2.7487	6.59362	6.76244	4.07422	0.902741	3.31898	1.98295	2.42061	4.93516	3.17631	5.89841	3.68604	3.15596	3.39209	5.45378	0.270217	0.769485	0.0633396	-0.0689875	0.689814	4.46672	3.68178	3.8076	3.0198	4.16365	4.772
CGGA_1715	2033	0	10.5833	2.73391	5.77206	5.09971	4.73632	-0.00684111	3.14405	1.32947	0.388905	1.47174	0.0398427	4.59881	5.56178	6.70838	2.53852	0.185008	5.85425	4.34153	2.96193	4.17359	2.90828	2.75857	6.3863	6.38824	3.31328	1.04558	4.70502	3.04844	1.21066	4.38112	5.00695	6.41577	3.66472	3.23276	3.17299	5.68825	0.829305	0.137301	0.0145069	1.73343	0.054697	4.32809	3.72041	4.48348	5.54291	4.77057	5.39309
CGGA_256	158	0	9.0212	2.92463	5.25665	5.44839	4.58862	0.0206438	3.80687	0.563686	-0.0521997	0.49234	-0.02705	4.32557	4.80854	6.1572	2.50955	0.205164	6.68828	3.71214	3.58676	3.8394	3.09085	2.61128	4.9376	5.49627	3.10175	1.06698	4.17492	1.7071	1.46586	4.50896	3.81903	4.88459	3.96885	3.02249	3.62706	5.41977	0.18983	0.600218	0.0211608	-0.082052	0.34451	2.98622	3.42961	3.26918	4.79408	2.89038	5.09003
CGGA_P311	1247	0	11.7768	2.62556	5.29247	4.61649	4.58673	0.0739577	4.23477	1.64361	0.173465	0.959917	0.121558	5.05109	5.95323	6.49636	2.12791	0.387762	6.77696	4.52612	3.01251	4.96243	3.65923	3.21798	6.38665	4.73525	2.91364	0.453219	1.76701	3.39689	0.690252	3.86859	3.90009	6.7098	5.61649	3.51126	3.41384	5.20941	0.302067	0.186331	0.396707	0.131526	0.108408	4.55537	3.7102	3.50417	5.32319	4.58636	5.17277
CGGA_1623	2307	0	10.3002	2.13338	5.4189	5.20647	4.81187	0.0936718	3.15854	0.342429	0.113581	0.506275	0.198815	5.66452	5.66656	6.16122	2.07548	0.0508186	5.94346	4.16488	2.17286	3.41012	2.88417	2.14142	6.56609	4.88874	3.28534	1.57064	3.15668	3.66136	1.52188	4.99005	5.12261	5.66034	4.45292	2.53676	3.28678	5.10508	0.340715	0.0864553	-0.00268873	0.413808	0.210054	4.60153	3.49861	4.48187	5.31038	4.19069	5.13623
CGGA_479	4445	0	10.2567	2.27536	5.49374	5.71711	3.97014	0.0761125	2.55028	0.613226	-0.0140683	1.03556	-0.02705	4.06125	4.38679	6.48264	2.50553	0.354555	4.82296	4.0502	2.6976	2.96308	2.80535	2.35486	6.19184	9.30361	3.8019	0.333518	4.87312	1.65338	1.6397	3.86284	2.05806	5.21845	3.64015	2.60551	3.52963	5.51311	0.200174	0.25364	-0.000553072	0.135879	0.00269431	3.52982	3.21787	3.3222	5.78709	4.08187	4.11011
CGGA_1693	517	1	12.0356	1.99393	5.54708	4.25236	8.93273	0.0339544	1.57051	1.81587	0.0508303	2.27687	0.235918	4.46763	5.28212	6.0188	1.98607	0.376596	4.60047	3.9764	2.18013	3.75034	2.95728	2.16694	7.7769	8.83962	3.03254	1.70237	3.5768	2.65663	0.672778	4.29436	2.36853	6.9053	3.25461	2.99661	3.9253	4.00454	0.80104	0.805672	2.41876	1.04868	0.0270543	4.58081	2.71159	4.48986	5.04377	5.16051	4.72121
CGGA_1033	1322	0	10.9634	1.81822	5.4971	4.2144	4.60063	0.151707	0.995164	0.461166	0.0888399	0.578694	0.0398427	4.63681	5.14396	6.5472	1.77106	0.5849	5.17825	1.67727	3.11518	3.03307	2.40488	2.754	8.28516	8.22238	3.6208	2.73848	3.08609	0.903953	4.3358	6.98198	2.00037	6.55047	1.70998	3.32798	3.92707	4.4513	0.565686	1.18515	0.238841	0.579269	0.565702	4.78921	2.76257	4.54081	4.92139	5.27805	5.17926
CGGA_P392	1099	0	10.1837	3.19813	6.45079	5.35578	3.21524	-0.00684111	2.6006	0.608458	0.0379116	0.396327	0.0398427	4.61665	5.85313	6.938	3.70543	0.442323	5.75186	5.77953	3.92982	3.96577	3.46149	3.63576	5.8087	7.09279	4.58925	2.13634	5.39478	1.62314	1.22832	5.45887	1.23443	5.88831	4.80041	3.19684	4.03307	6.31726	0.0782527	0.186331	-0.00268873	0.0738302	0.293354	3.92706	4.09211	3.91685	5.70374	3.82094	5.02309
CGGA_1588	2003	0	12.7346	1.5625	4.4479	2.01525	6.10947	-0.00684111	4.2794	1.18857	0.185121	1.35025	0.0398427	5.45625	6.10793	5.24854	3.551	1.12068	2.55523	3.90597	1.3236	4.89373	1.94816	1.43943	8.76314	8.5302	2.29942	0.826377	0.971437	2.78749	0.422529	3.29377	2.02834	6.87845	4.62584	1.9458	4.82932	2.70761	0.00125961	0.0470452	0.177661	0.436975	0.108408	4.65053	2.18964	3.44135	2.82043	5.25786	3.52695
CGGA_1679	2146	0	12.0323	1.41912	4.76983	3.18305	4.86612	0.0936718	0.966497	0.824141	0.063623	0.638091	0.223658	4.58072	4.88928	5.73153	1.38067	0.0786793	4.23555	2.51485	2.61357	3.48354	2.19282	1.98917	9.34035	8.94432	2.14018	1.60898	2.23375	1.33152	3.06252	5.74574	0.72092	7.03632	1.34853	2.84978	4.07167	3.50123	0.378439	0.625657	0.340955	0.26658	0.497397	4.67629	2.2946	4.14972	3.90835	5.92306	3.414
CGGA_1661	2209	0	12.3795	1.45168	5.3521	3.508	5.38761	0.0936718	2.6486	0.909489	0.0508303	1.30745	0.0537937	4.16528	5.74065	5.92836	1.50094	0.0224062	5.12361	3.81528	2.31429	3.55791	3.11271	1.89463	8.5364	6.04894	2.50518	1.16671	0.962649	2.85171	0.453862	3.719	1.0748	7.38072	3.30504	2.44956	3.83772	3.87591	0.509522	0.245254	0.0483933	0.589665	0.246358	4.56069	2.81157	4.17364	4.26142	5.90965	3.75404
CGGA_730	2118	1	10.1615	2.86188	5.56743	5.88809	4.37646	-0.00684111	4.23574	0.808052	0.113581	1.18472	0.08129	4.37477	5.2023	6.48693	2.43954	0.222934	6.11936	4.58284	3.32622	3.87908	3.2414	2.89069	6.33996	9.50179	4.42934	1.26729	4.18373	2.68286	1.15007	4.65995	3.52499	5.72982	4.45215	3.07084	3.50969	5.816	0.509522	0.544623	0.0315332	0.187044	0.0409434	4.02407	3.67168	3.76272	5.93848	3.91152	5.13267
CGGA_1030	3664	0	10.6099	2.72918	5.56139	5.43888	3.68183	0.189508	1.52566	0.863578	0.125779	0.936255	0.08129	4.2133	5.1427	6.67295	2.5152	0.545589	6.23031	2.73319	4.29409	2.71989	3.25972	3.07098	7.02362	7.33823	3.54193	2.86033	3.9843	1.55044	4.3346	6.67958	2.19099	5.8136	2.75663	3.68075	3.34775	5.11705	0.576683	0.894742	0.382937	0.962812	1.01117	4.47471	3.52382	4.54387	5.20974	4.63293	5.19666
CGGA_265	3959	0	10.9695	2.64089	5.71491	5.35213	5.46306	0.208152	3.62328	0.617751	0.125779	0.98321	0.134731	4.65413	5.71929	6.76564	2.14363	0.295904	6.77997	3.99818	3.06486	4.05371	3.21598	2.58551	6.37656	5.78474	3.22769	1.72186	3.215	2.66143	1.78677	4.77457	4.72991	6.109	4.8155	3.19684	3.27825	5.10832	0.498045	0.137301	0.0483933	0.117313	0.536833	4.68767	3.42626	4.22735	5.65925	4.44281	5.3354
CGGA_P185	502	1	10.853	4.33034	6.4651	5.81964	2.94427	-0.00684111	4.6514	0.916998	0.185121	1.69338	0.186228	4.24504	6.46328	6.73548	4.06911	0.409836	6.49941	4.98031	3.78883	3.72936	4.47722	3.54114	5.55273	6.25209	5.38584	2.62295	4.9385	3.83275	2.24425	5.23728	3.94283	5.2649	4.04647	3.29609	4.12146	6.15074	0.262449	0.366615	0.162022	1.65019	0.361034	3.86835	3.56013	4.86956	5.1001	4.32245	5.581
CGGA_1994	1237	0	11.5509	2.18879	5.53631	5.10174	5.02481	0.0339544	1.29275	0.894351	0.0379116	0.944184	0.0257529	4.65817	5.29115	6.77386	1.83689	0.484525	5.70945	3.81837	2.723	2.85631	2.84372	2.63163	7.91103	9.22714	2.82355	2.02302	4.13063	1.45673	2.76029	5.84635	2.47665	6.58985	3.30504	3.24305	3.52046	4.67516	0.180097	0.790248	0.0650905	0.329725	0.527076	4.69158	3.20511	4.07154	5.54185	4.86115	5.08096
CGGA_1273	2438	0	10.2102	3.56546	6.05974	4.70442	3.3057	0.263091	2.47296	0.450776	0.149839	1.48831	0.0398427	4.7018	5.62902	6.53291	2.74888	0.235356	5.99823	5.55219	4.19444	4.08311	3.31636	3.00488	6.61155	5.88197	3.17831	3.34514	4.50956	1.28714	2.77917	5.67681	3.22674	5.55604	3.69112	3.19684	3.68944	5.50769	0.543459	1.35969	0.0980086	0.279428	0.693119	4.57318	3.25901	5.31187	5.45912	4.32303	5.43341
CGGA_1487	520	1	12.0169	2.71728	5.52202	4.97455	4.75294	0.0136576	2.70641	2.79761	0.296309	0.558359	0.341727	5.19248	6.59501	6.3724	1.90426	0.525521	6.30274	3.95611	2.03048	3.74721	3.43142	2.47669	6.67248	4.15202	4.38552	3.27197	4.014	5.19185	0.985669	4.4719	3.11809	5.3311	4.6176	2.84978	2.89113	5.07274	0.00125961	0.634373	0.528691	0.145603	0.108408	4.53138	3.91772	4.52646	5.27509	3.82094	4.92219
CGGA_1144	2505	0	9.93545	2.74332	5.47978	5.34749	3.83385	0.0739577	1.96923	0.419138	0.063623	0.904111	0.08129	4.03175	5.0298	6.51397	2.19721	0.463579	5.9245	1.93992	3.96874	2.69454	3.04614	3.12014	6.94976	7.75432	3.57993	2.96131	3.93695	1.74883	3.85684	6.44199	3.01478	5.25425	2.54728	3.17076	3.26391	4.76902	0.486484	0.750913	0.177661	0.425437	0.517253	4.1887	3.24427	4.38495	5.12283	4.42245	5.29238
CGGA_1903	1474	0	12.9758	2.4197	4.71486	2.42976	5.70848	-0.00684111	2.03438	1.00411	1.11129	1.43802	1.53827	4.3487	5.3197	5.37614	1.34521	0.0224062	3.32513	2.91718	2.23686	4.7352	2.72422	2.00973	8.62201	9.05725	1.89716	2.61489	2.98682	1.85984	0.707504	3.34386	0.818562	7.24203	3.01658	2.37055	4.19288	4.05636	0.302067	0.00647017	0.78781	0.737387	0.517253	4.14212	2.66083	3.87746	3.61277	5.93764	3.83726
CGGA_1482	2592	0	12.6037	1.90684	5.03452	3.74466	5.02388	0.113199	2.71769	1.54649	0.185121	0.722983	0.0676086	4.63988	5.43001	6.1641	1.69626	0.0508186	5.02196	3.37742	2.22641	4.58604	2.55027	1.89016	8.3731	9.59533	2.84664	0.818931	2.70424	2.51218	0.790635	4.08538	1.25927	7.39225	2.70318	2.9272	4.07562	4.30181	0.249019	0.0993445	0.0483933	0.746727	0.054697	4.09583	2.66553	3.2096	4.80454	5.20053	4.42171
CGGA_1232	2067	1	10.6851	2.86401	5.72772	5.00769	4.75294	0.170694	3.84287	0.225043	0.274813	1.30745	0.307328	4.9472	5.99281	6.14375	2.04635	0.0366828	6.43512	4.91556	2.83926	4.66299	3.33834	2.03796	6.43514	5.13306	3.0563	1.29397	3.14547	3.85734	0.749703	3.16542	6.25481	5.93191	5.01432	2.95321	3.36257	5.0656	0.619919	0.397933	0.162022	1.19302	0.258255	4.68898	3.09821	5.06079	5.03252	4.98295	4.95141
CGGA_108	366	1	10.4338	3.4588	6.02286	4.45402	4.12384	0.0136576	5.25969	3.0328	0.125779	0.84614	0.08129	4.81329	5.69182	6.41198	3.78581	0.17214	6.36164	5.47606	4.12024	4.11028	4.02667	3.48267	5.48552	5.68423	3.42565	1.59632	4.79112	2.89497	1.75932	4.12194	4.64101	5.84937	6.9325	3.5077	4.14719	6.16486	0.474838	0.971605	0.268637	0.640572	0.258255	3.96443	3.56359	4.18375	5.64143	3.68811	5.6936
CGGA_1544	208	1	11.6384	2.61524	5.91791	5.70241	4.67047	0.0540532	2.257	0.0282841	0.113581	1.18472	0.0537937	4.646	6.49185	6.7069	2.26658	0.0648166	6.77841	3.73021	2.78584	3.7822	3.55298	2.4216	5.51261	4.87925	3.11585	1.62983	3.48254	2.92903	0.999577	4.34504	3.5216	6.22268	3.34382	2.41067	3.24651	5.13752	0.415282	0.366615	-0.00268873	0.131526	0.293354	4.37613	3.17256	4.35939	5.37101	4.77425	5.21863
CGGA_1178	422	1	11.3132	3.24806	6.13158	4.90791	3.39353	-0.00684111	2.56036	0.308229	0.296309	1.60964	0.160713	4.51588	6.4235	6.55478	2.53852	0.235356	6.86234	4.84997	3.60429	4.48896	3.70809	3.25575	6.4226	7.17563	3.94738	2.4924	3.41136	2.671	2.37893	5.41285	3.91364	5.50261	3.94259	3.03513	3.88859	5.45402	0.108028	0.268133	0.253803	0.727987	0.68439	3.84441	3.24575	4.72933	5.41052	4.18223	5.33137
CGGA_599	418	1	9.20526	2.22707	4.46552	6.63447	3.37283	0.00142661	3.10702	0.822266	0.0417754	1.52212	0.189784	4.21084	5.32599	4.94181	2.92979	0.143312	6.0228	3.65362	2.72424	3.11371	3.45435	2.28032	6.51863	10.2765	3.301	0.573897	4.00712	2.66376	0.532791	4.16449	3.51859	5.6091	3.61288	2.77887	3.30165	4.83251	0.399244	0.0164621	0.0838358	1.20516	0.0747375	3.51196	2.36567	3.39543	5.8307	3.94353	4.30924
CGGA_1689	2118	0	11.3782	2.66852	5.69844	5.71191	4.88429	0.24494	4.01056	0.296642	0.880217	1.39185	0.134731	4.18952	5.98275	6.34997	2.20468	0.159155	6.81671	4.05289	2.65192	4.04377	3.2414	2.46529	6.194	6.48755	3.33426	0.44344	3.64555	3.81611	0.830372	3.48216	4.05812	6.04543	4.92642	2.97329	3.27968	5.35387	0.403096	0.408215	0.0483933	1.04108	0.013027	4.43044	3.57163	4.2293	5.49676	4.22146	5.27135
CGGA_P421	308	1	11.2058	3.5923	6.50004	4.53153	1.85728	-0.00684111	3.57957	1.07948	0.0379116	0.107763	0.0257529	5.4413	7.9344	7.23555	3.61218	0.106009	6.25254	7.34271	2.67934	4.15384	4.74106	3.60538	5.75297	6.64425	4.43937	4.28016	1.81117	5.89219	0.312557	3.87257	2.81361	5.77158	7.57297	2.97148	4.0517	5.42774	0.122708	0.00647017	0.162022	0.459782	0.0270543	3.7724	3.90987	4.11547	5.66674	4.43855	4.83616
CGGA_420	3514	0	10.9893	3.71317	6.44809	5.02887	1.24049	0.170694	2.23349	1.62109	0.241893	0.928283	0.08129	4.83587	5.70821	6.96143	4.12184	0.0648166	5.75103	4.68962	4.01184	4.41333	3.63842	3.54858	5.78989	3.79868	4.24327	2.4475	5.34716	1.01793	1.21066	4.34711	1.48518	5.87635	3.0997	3.39076	3.62259	6.22655	0.781912	0.033653	0.0315332	0.459782	0.121522	4.79361	3.27793	4.43681	5.91313	4.26197	5.77419
CGGA_1516	2530	0	11.2406	2.56236	5.58092	5.77689	4.65315	0.0936718	2.55407	0.75865	0.063623	1.60456	0.0948405	4.39724	5.2531	6.62318	2.02514	0.159155	5.71058	4.65292	2.84795	3.70157	2.75393	2.55915	6.60549	7.96679	3.40604	2.12195	5.35893	1.80766	1.02697	4.1567	3.54069	6.28911	3.80187	3.18002	2.97401	5.23473	0.772261	0.599174	0.0483933	0.131526	0.121522	4.5289	3.43521	4.39697	5.49704	4.60192	5.33002
CGGA_1211	3042	0	10.0188	3.04842	5.40425	5.84609	3.89655	0.0540532	3.02021	0.136631	0.113581	1.05833	0.0398427	3.69684	4.5717	6.43932	2.91065	0.119482	5.99395	3.64179	3.21849	3.22037	3.04223	3.00299	6.21755	5.8741	4.04125	1.8824	4.8816	1.70182	2.00185	4.84886	3.20399	5.70643	4.02586	3.30728	3.0023	5.68034	0.692845	0.507012	0.0483933	0.117313	0.197742	4.02183	3.40162	3.67718	5.42557	4.11101	5.36884
CGGA_320	3005	1	9.94242	3.17492	5.7914	6.07543	3.42619	0.368761	3.90627	0.162463	0.230734	0.837672	0.0398427	4.36212	5.32848	6.49562	3.50902	0.365343	5.51246	4.97507	3.53475	3.81728	3.14203	3.14235	6.06069	7.33641	3.82214	2.4924	5.60846	2.49336	2.87857	5.70215	3.70316	5.42968	3.95026	3.31006	4.21587	5.993	0.427374	0.516512	0.0650905	0.304791	0.22226	4.28114	3.8201	4.28702	5.56431	3.96073	5.44482
CGGA_1408	1362	1	9.50827	3.11786	4.05425	4.42332	5.38346	0.0939191	5.68153	0.920836	0.0781413	0.556071	-0.0417113	4.32127	5.07225	3.32226	1.24265	0.205164	6.29086	4.28938	2.60701	4.10919	2.49815	3.1356	5.5611	1.94961	4.54463	0.996028	2.4568	3.3425	1.47196	3.31299	4.94181	4.45735	4.6032	2.03908	3.69569	4.57516	0.381629	0.0943584	0.244127	0.147024	0.102616	5.03927	2.94405	3.75904	3.34027	3.12874	4.6808
CGGA_1280	447	1	8.60483	3.39068	5.25111	6.14176	4.48934	0.00142661	4.52563	0.347481	0.48363	0.49234	-0.0565184	3.94355	6.34702	3.54935	2.16603	-0.016954	6.95039	4.07273	2.65385	3.94269	3.55556	3.03464	6.11681	6.11431	3.98783	0.464456	1.4815	2.94366	1.42255	4.41646	4.43833	4.14607	3.26381	3.72274	3.87826	4.3116	0.539481	-0.0157711	-0.000553072	0.704271	0.284526	4.48616	3.33834	3.9228	5.02331	3.84875	5.54397
CGGA_P356	569	1	11.6145	2.15212	5.84455	4.95243	4.48351	0.0540532	2.60669	2.08501	0.063623	1.14376	0.0398427	4.00093	6.15697	6.92421	1.75539	0.185008	5.88962	4.55448	2.34657	4.0228	3.32111	3.1575	7.10834	5.25862	3.89632	1.80811	2.59497	2.35993	1.35129	4.52287	2.79621	7.48144	3.75884	2.86761	3.84243	4.87651	0.576683	0.112114	-0.00268873	1.42762	0.185321	4.37949	3.48275	3.84295	5.11341	6.06499	4.80609
CGGA_1087	701	0	11.3567	3.24806	5.92338	5.37382	3.82914	-0.00684111	1.55784	0.561052	0.063623	1.73588	0.0948405	3.68286	5.49726	6.87165	2.50339	0.319426	6.28121	4.4959	3.49458	3.43946	3.35535	2.84245	6.70218	6.47266	2.89167	2.64289	4.42432	1.36846	1.86963	4.42535	1.72691	5.82914	2.27473	3.2989	2.50194	5.60431	0.937556	0.397933	-0.00268873	0.493344	0.0951706	4.13122	3.24575	3.9852	5.62385	4.77261	5.30517
CGGA_785	3517	1	9.95611	2.67819	5.14487	5.68997	3.02433	0.0110828	2.58543	0.415651	0.769517	1.10782	0.00184609	4.02719	4.04786	6.54342	2.56892	0.0918458	4.70176	3.39849	2.56788	3.04979	2.05361	2.35486	6.83547	9.34717	3.05805	1.33071	5.50572	2.26815	1.43504	5.04259	2.16113	5.58126	3.00475	2.68831	3.29999	5.49583	0.250613	0.436136	0.0211608	1.00151	0.0887415	3.57782	3.40961	3.36999	5.44298	4.09017	4.55801
CGGA_1882	1531	0	12.7485	1.66447	5.23539	3.82654	4.53592	0.0540532	1.97872	2.01469	0.0888399	1.08736	0.0398427	4.47521	5.64308	6.21953	1.96833	0.17214	5.2987	4.70787	2.6744	4.73274	2.66006	1.94706	8.26234	9.45089	2.95019	1.82258	2.88229	1.82527	1.15626	4.41362	1.33697	7.42792	3.3488	2.8735	3.80915	4.14125	0.180097	0.377134	0.162022	0.131526	0.270052	4.54612	3.10153	3.89856	4.67862	5.00392	4.49292
CGGA_107	2156	1	10.4543	4.0203	5.83067	5.28649	3.71834	0.151707	3.63216	3.47276	0.0379116	0.920269	0.0398427	4.91336	6.19978	6.02935	3.31188	0.0224062	6.79099	5.71138	3.71325	4.50545	4.76243	3.58151	6.12127	3.81055	5.69874	1.361	4.39987	3.23355	1.94428	3.83329	3.58885	6.00741	6.03529	3.63105	4.09602	5.29629	0.315055	0.00647017	-0.00268873	0.26658	0.0951706	3.63604	3.28369	3.692	5.70771	4.97426	5.68227
CGGA_578	362	1	10.2738	3.22184	5.8299	4.80316	3.46856	0.00142661	2.364	1.05031	0.0781413	0.415539	0.00184609	3.95497	6.29539	6.53776	3.12174	0.0248145	6.52881	4.27114	2.57227	6.17694	4.15497	1.76289	4.78584	6.78396	2.7619	0.883422	3.81591	1.87838	0.808035	3.59415	2.18952	5.2292	2.39738	3.13798	4.89845	5.58281	0.425197	0.0323424	0.042453	1.55902	0.129988	3.10014	3.63255	4.16312	4.4162	4.00252	5.95911
CGGA_554	134	1	12.4764	2.44362	4.8876	3.90341	4.65149	0.0739577	1.69135	1.03887	0.125779	1.28244	0.0537937	4.68955	5.34512	6.31239	1.84673	0.132828	5.20192	3.85989	2.31755	3.85817	3.20739	2.32632	8.83695	8.37669	2.42966	3.12401	2.11037	3.75189	2.4992	5.50047	2.20015	6.74327	3.6419	2.79472	4.01996	4.08873	0.194125	0.72676	0.0145069	2.16375	0.50736	4.62513	2.16197	4.0516	4.3873	6.17664	4.23232
CGGA_1642	2266	0	12.2927	1.62578	5.48751	3.64293	5.5198	0.0136576	2.18115	0.654319	0.0379116	1.09452	0.0398427	4.29625	6.20071	5.94203	1.01119	0.0224062	3.68909	4.0988	1.49421	3.87814	1.79826	1.45207	7.94734	7.11679	2.25427	0.51979	1.48674	2.86835	0.59125	3.56514	3.54403	7.35819	3.89113	2.24199	3.69783	3.52075	0.365964	0.0603081	0.0145069	0.689776	0.108408	4.72034	3.04897	4.26386	4.30166	5.94268	3.84178
CGGA_P176	804	0	9.78989	3.98437	6.11136	5.39289	3.13694	0.0936718	3.45318	0.481718	0.185121	1.11583	0.211291	4.04648	5.56117	6.38048	3.97137	0.463579	5.49539	4.94228	3.94292	3.84758	3.49914	3.81043	5.65743	6.52449	4.46832	2.47013	5.48581	1.834	2.73148	5.32932	2.77066	5.31772	2.67702	3.29469	4.13136	5.86064	0.532228	0.535316	0.162022	0.17336	0.147389	4.23295	3.8489	4.51455	5.45569	3.73829	5.45064
CGGA_1502	2565	0	11.4686	1.71257	5.20325	4.72424	5.03935	0.113199	2.1353	1.94429	0.125779	0.862934	0.0257529	4.81284	5.09165	6.28186	1.67408	0.106009	5.04683	3.68899	2.03048	3.45258	2.40488	2.09264	8.03184	8.25858	2.32983	1.37103	3.20605	2.48793	0.543757	4.3065	3.82296	6.6836	5.77195	2.78845	3.58448	4.72296	0.327937	0.290637	-0.00268873	3.26294	0.054697	4.66392	3.2994	3.39029	5.11831	5.16802	4.64483
CGGA_560	4354	0	10.8892	2.96814	6.30052	4.80459	3.65499	0.0939191	1.85014	1.4629	0.408956	2.13547	0.536902	3.97386	4.56052	7.65483	1.9033	0.0654063	4.66344	5.20599	3.72845	4.0902	3.11224	2.72234	5.59172	5.97058	3.25875	2.48838	4.81116	1.11312	1.86097	4.06427	1.63284	6.61186	2.14442	3.15596	2.83831	5.83561	0.83537	1.08788	0.444045	0.294191	0.457753	4.91108	3.46915	4.39223	5.15014	4.85279	5.2167
CGGA_705	1507	1	10.7629	3.65588	6.49194	5.5957	3.43903	0.208152	4.29705	0.273178	0.161705	2.93702	0.450705	4.27397	6.9103	6.56495	2.81133	0.106009	6.39188	5.32694	3.23467	4.83906	3.99896	3.05295	5.66814	6.2856	3.99463	0.855768	2.52394	3.01536	1.23997	4.07438	3.33763	5.88547	5.06471	3.1754	3.84055	5.88264	1.01413	0.458502	0.297928	0.253619	0.22226	4.49779	3.83039	4.51298	5.39048	4.95775	5.47903
CGGA_1647	2229	0	12.5011	1.43224	4.8876	2.79025	5.78969	0.189508	2.446	1.07948	0.0248644	0.430169	0.0676086	4.82086	5.28287	5.41495	1.38067	0.0786793	3.73694	3.07202	2.1359	4.40198	2.38549	1.57775	8.90373	8.27777	1.37258	1.1725	1.82559	2.02087	0.628088	3.73894	0.941155	7.48228	5.55197	2.30483	4.13892	3.43566	0.00125961	0.210205	-0.00268873	1.19988	0.0270543	4.38228	2.39731	4.01615	3.21544	6.29306	3.2149
CGGA_1020	1120	1	10.4941	3.51575	6.30173	4.47556	3.7108	0.0301116	4.14646	0.573725	-0.0521997	1.86399	0.0987801	4.18238	5.80571	6.51999	3.83928	0.298915	6.17257	4.25029	2.6976	3.58487	3.67685	2.07005	5.42109	8.0153	2.72619	0.78322	2.83774	3.31849	1.35214	3.84112	3.59933	5.15232	3.75032	1.55455	3.77559	5.82661	0.168874	0.531912	0.726093	3.50293	0.0606021	4.50163	3.84274	3.85036	4.27592	4.12309	4.49019
CGGA_1362	2804	0	10.3419	3.44804	5.44108	5.4429	3.98941	0.0339544	4.6194	0.342429	0.196674	1.20478	0.108262	4.23103	5.89514	6.35722	2.82764	0.210403	6.73142	2.6842	3.82605	3.78119	3.71276	3.36568	6.21795	7.48009	3.46698	2.47908	5.2485	3.61862	2.47129	5.35723	4.71195	5.26334	4.27665	3.50413	3.27683	5.80619	0.486484	0.836009	0.437371	1.65522	0.895433	4.27324	3.52263	4.27768	5.5373	3.69389	5.20527
CGGA_P271	1376	0	6.34578	1.63138	3.73144	3.06594	2.89815	-0.00684111	2.04344	0.0834995	0.0508303	0.430169	0.0257529	2.38249	2.96486	2.2635	1.20893	0.0366828	2.99494	1.32545	1.43122	2.11632	1.07523	0.79377	1.71371	4.84166	2.40775	0.33101	2.63325	0.912411	0.757988	1.11405	1.28969	3.48766	1.69442	0.964409	2.59967	2.8766	0.235473	0.00647017	-0.00268873	0.102961	0.0409434	1.88941	1.46005	2.46283	1.98497	1.81928	2.8899
CGGA_276	529	0	9.16386	2.90659	4.9368	6.68043	3.52931	0.0301116	2.3181	0.670608	0.200367	1.64093	0.333907	4.1055	4.4581	5.91077	2.30219	0.0918458	5.17626	3.70771	3.24074	3.1032	2.94795	2.30991	6.01329	10.7548	3.55999	1.99359	4.93592	1.74804	1.7668	5.1429	3.19254	5.68402	2.89154	2.71261	3.38262	5.36784	0.629552	0.239787	0.13346	-0.00547709	0.296715	3.5349	2.97279	3.79476	6.26747	4.06687	4.18228
CGGA_P269	511	1	12.3717	2.28621	5.51733	4.02637	4.50743	0.351521	1.62616	3.4432	0.0248644	0.676417	0.0537937	4.64906	5.47404	6.5853	2.31886	0.5849	4.83239	5.53754	2.46529	4.31222	3.28755	2.52407	7.68208	7.71637	4.11739	0.362597	3.27615	2.76762	0.141969	4.39116	1.17678	7.43572	3.93488	2.99839	4.09212	4.09491	0.315055	0.301752	-0.00268873	0.526157	0.0270543	4.48913	3.22182	3.50984	5.43229	5.1891	5.55123
CGGA_1477	1194	1	11.5716	2.11053	5.01508	5.1771	5.91706	-0.00684111	2.23743	1.05254	0.0508303	1.78624	0.108262	4.56237	5.30235	6.4856	1.97279	0.146052	6.43892	2.91718	2.42391	4.6165	2.81836	1.81175	7.50319	9.49934	2.64208	0.276697	2.23733	3.25876	0.390459	4.47565	3.5351	6.9916	4.21337	2.82763	3.1131	4.80059	0.151663	0.268133	-0.00268873	0.26658	0.0683177	4.41749	2.66083	3.7766	5.09933	4.66588	4.32342
CGGA_P265	779	1	6.29902	1.06409	4.11954	2.45994	2.83849	-0.00684111	2.31415	2.01125	0.0379116	0.373332	0.0257529	2.64862	2.76623	2.22138	0.884603	0.0508186	2.5409	3.1734	1.17516	1.86181	1.39193	0.729321	2.5932	0.352824	2.95865	0.208554	0.636844	1.58207	0.663957	1.38815	1.67384	3.5109	1.55209	0.955563	2.58546	2.95711	0.108028	0.00647017	-0.00268873	0.17336	0.0270543	1.8595	1.0451	2.67538	1.93045	2.55151	2.77454
CGGA_867	367	1	11.0704	2.74566	5.90943	5.11702	4.08315	-0.00684111	4.27002	3.21536	0.0888399	1.33206	0.0398427	4.74681	6.42786	6.17005	2.55859	0.222934	6.83503	5.40339	2.67934	4.37511	4.20955	3.00676	6.32776	7.76647	3.70273	2.57803	3.63101	3.75953	0.845949	4.10212	5.07047	6.11405	6.64968	3.31006	3.78486	5.41149	0.791505	0.0993445	0.0650905	2.77904	0.23436	4.48503	3.44664	4.83874	5.73944	5.14658	5.51349
CGGA_1046	3559	0	10.176	1.74927	5.60056	5.26734	3.9623	0.0206438	2.24473	0.38195	0.0960748	1.18743	-0.0417113	4.26672	5.70175	5.86002	2.0806	0.104886	4.75936	4.27035	1.91926	4.54342	2.38792	2.35747	6.31467	6.65152	2.70306	1.08424	2.06543	2.54711	2.06483	4.86378	2.70384	5.65111	3.65965	1.84749	4.64659	4.95791	0.0925452	0.423758	0.052946	-0.0305278	0.284526	3.73006	3.92451	4.25311	2.93451	3.57176	2.29348
CGGA_P326	1217	0	10.9159	2.37985	5.91585	5.16792	5.19857	0.0136576	2.16049	1.04572	0.0248644	1.17797	0.0948405	3.95806	5.99585	6.55366	1.90426	0.0786793	6.26096	4.28298	2.84579	3.27978	3.30523	2.19902	7.49478	7.20583	3.1456	1.45814	1.15978	2.24832	1.7313	4.86702	3.81118	6.4888	4.56358	3.09574	3.3545	4.77444	0.340715	0.279431	0.0315332	0.0738302	0.258255	4.64287	3.29228	3.61302	5.26844	4.72676	4.93666
CGGA_D50	782	1	10.5341	4.13826	5.79443	5.27103	2.53378	0.0339544	2.27631	2.25409	0.0762921	1.99592	0.223658	4.34613	5.53536	6.76705	4.32713	0.259883	6.01922	5.35236	4.32082	4.05537	3.7619	3.56087	5.81298	4.87373	4.54176	1.77501	5.11064	1.61807	1.39339	3.96911	2.58581	5.98123	6.66627	3.39076	3.46696	6.13358	0.772261	1.19673	0.19316	0.709005	0.185321	4.24674	3.72447	4.49831	5.4554	4.35077	5.72261
CGGA_D47	1048	1	11.0365	2.99733	6.08287	6.13741	3.24281	0.0939191	1.65512	2.87807	0.892288	1.53915	0.759143	4.64262	5.21259	7.48584	2.74421	0.252801	4.9925	4.86938	3.46632	3.25681	2.63171	2.77904	6.11829	5.64706	3.02551	2.06081	4.43128	1.79509	2.01286	4.6251	2.4725	6.19371	5.72584	3.38653	3.14191	6.45479	0.491811	0.976758	0.507938	0.857672	0.296715	4.43736	2.88313	4.09441	5.31337	4.73608	5.30616
CGGA_337	1008	1	9.92649	2.79314	5.20586	4.65003	3.77379	0.00142661	4.51737	0.335814	-0.0140683	1.14822	-0.02705	5.1812	4.77	5.81133	2.19449	0.7106	5.09323	4.85698	3.84216	3.58075	2.68066	2.80046	6.73069	6.80305	3.01728	2.29679	4.93955	2.28387	2.99485	5.76674	4.10471	5.59155	3.63523	3.2135	3.70358	5.58992	0.399244	0.958968	0.235319	-0.135597	0.183283	3.97375	2.89298	4.2231	4.7457	3.52458	5.41215
CGGA_P364	495	1	12.0676	2.91215	5.61708	5.50808	4.28038	0.0136576	4.45172	1.20697	0.0508303	1.08015	0.0676086	5.06144	5.89114	6.45944	1.86135	0.0924094	6.58778	4.7946	2.36869	3.50755	3.66045	2.08112	7.24509	9.07838	4.21329	2.66255	3.58644	3.75408	0.534057	4.10959	4.97459	6.60362	6.7495	3.26338	4.15243	5.20728	0.427374	0.0201289	0.208522	0.568799	0.0818081	4.52493	4.3309	3.86118	5.85792	5.36526	5.10061
CGGA_J030	3389	0	9.6374	2.83713	5.70109	5.03739	2.9158	0.0206438	2.59236	0.642189	0.0960748	0.52003	-0.0417113	3.95117	4.34676	6.35013	2.61136	0.143312	3.86118	4.37849	3.2264	3.43365	2.40493	3.19861	5.81161	7.44874	3.03098	1.45833	5.74451	1.52319	2.34665	5.22914	1.8664	5.58347	2.99576	3.19814	3.53688	5.48511	0.21043	1.02899	0.152698	-0.082052	0.435775	3.48373	3.23297	4.11111	4.34129	3.50588	3.91517
CGGA_P104	167	1	5.90198	1.6145	2.95485	3.62863	1.89309	-0.00684111	2.58217	1.16992	0.0508303	0.302145	0.0257529	1.78373	3.36268	2.39843	0.91492	0.106009	2.72172	2.9449	1.15934	2.4747	1.11933	0.729321	2.07945	2.07894	2.19289	0.462929	1.85399	0.869597	0.798675	1.34053	1.18331	3.00264	1.61403	1.1372	3.07551	2.85768	0.180097	0.00647017	0.081628	0.102961	0.013027	1.67316	0.882609	2.56762	1.88397	1.59738	2.72798
CGGA_1686	745	1	12.3367	1.71257	5.44805	4.70052	5.68837	0.0540532	2.67201	1.41613	0.0248644	0.862934	0.0398427	3.93253	5.97549	6.36719	1.6572	0.0508186	5.82665	4.9985	1.78986	3.77915	3.24976	2.04988	7.04398	6.55608	2.95231	2.50559	2.80804	4.27977	1.45915	4.47565	2.55819	6.57081	4.03723	2.86367	4.10068	4.51034	0.275766	0.978384	0.146239	0.366351	0.639915	4.60527	3.01919	3.84906	5.20097	4.82357	5.05847
CGGA_446	4508	0	10.8599	3.50495	6.70783	4.92419	1.69824	0.00142661	2.00812	1.71785	0.00472327	1.19293	-0.0417113	3.45827	4.25189	7.43422	3.16262	0.310216	4.67573	4.20864	3.60551	2.94412	2.45515	3.09317	5.801	5.89523	3.24323	1.58927	5.63318	1.2554	1.52584	3.83893	1.92851	5.55985	2.27439	3.09932	3.24946	5.89149	0.345615	0.294506	0.0318586	-0.017945	0.209239	4.90764	3.85795	4.20462	4.32566	4.27234	5.05971
CGGA_1721	1994	0	12.0232	1.70204	5.40425	3.91074	5.13648	0.0136576	1.58307	1.68761	0.0379116	1.97226	0.160713	4.5882	5.23443	6.54678	1.52623	0.222934	4.56189	4.02404	2.31429	4.21001	2.38224	1.73837	8.19588	8.73926	2.70444	1.6945	2.82226	1.79431	1.39857	4.53068	1.29569	7.34317	2.97852	2.71071	3.56962	4.44196	0.609221	0.909041	0.162022	0.402086	0.270052	4.82557	3.27359	3.89016	4.66125	5.1719	4.714
CGGA_P266	253	1	6.03164	1.56838	3.20434	2.39534	2.76341	-0.00684111	1.8449	0.961226	0.0248644	0.314248	0.0257529	1.98225	2.97391	2.44693	0.934748	0.0224062	2.28146	2.51216	1.41171	1.50031	1.43339	0.614183	2.29904	2.39488	2.84893	1.42492	2.18643	1.25456	0.34649	1.90518	1.21549	2.84031	1.6521	0.834588	2.36329	2.6703	0.208028	0.00647017	0.0483933	0.131526	0.013027	2.01754	1.51376	1.95305	2.18574	2.38415	2.33706
CGGA_J50	1693	1	10.984	3.43172	5.98681	4.97142	3.8149	0.0936718	3.87927	0.308229	0.101269	1.81301	0.121558	4.5705	5.95906	6.32847	2.52691	0.159155	6.10311	4.06922	3.31266	3.88942	3.75966	2.55114	6.10977	7.19298	3.27199	2.28539	3.77616	2.29279	1.03374	4.07693	4.84511	5.80757	4.03001	2.92155	3.35854	5.19742	0.474838	0.174237	0.238841	0.117313	0.210054	4.58744	3.41206	4.98888	5.25403	4.98503	5.27452
CGGA_1850	750	0	11.2416	2.9625	5.65532	5.72527	4.12509	-0.00684111	4.01395	0.261298	0.0508303	1.73588	0.108262	4.37917	6.15831	6.57956	2.42071	0.146052	6.62005	3.55219	3.09565	3.79635	3.63348	2.58551	6.21929	7.91111	3.24661	1.58781	3.71111	3.23355	1.3725	4.38179	4.70124	6.05256	4.23686	3.23424	3.31761	5.5087	0.486484	0.137301	0.146239	0.145603	0.17279	4.27141	3.27359	3.57057	5.88966	4.28927	5.16778
CGGA_1685	225	1	9.30071	3.96737	6.44282	5.43517	3.00977	-0.00684111	3.9244	1.5982	0.252958	2.12695	0.295674	4.24574	6.45889	6.85051	3.52271	0.106009	6.46892	5.2886	4.08733	4.19452	4.33564	3.32077	5.7933	7.30422	4.36307	1.92978	4.54964	1.42209	2.2359	5.29548	2.96082	5.36378	3.57826	3.42673	3.77897	6.03214	0.543459	0.174237	0.238841	0.145603	0.565702	4.72245	4.07379	3.90274	5.43084	4.24157	5.62845
CGGA_501	4427	0	9.87656	2.98764	5.46758	5.83033	3.60235	0.0206438	2.42099	0.651722	-0.0521997	0.616876	-0.0125318	3.46141	4.65281	6.38016	2.10045	0.51941	5.37156	4.29489	2.70172	3.44548	2.76101	2.87382	5.98787	9.93042	3.50254	0.642961	5.89964	1.50613	0.817072	3.97015	2.19304	5.78208	3.67251	3.23093	3.56841	5.72628	0.416608	0.759406	-0.000553072	-0.0432277	0.00269431	3.45006	3.20485	2.92691	5.6933	3.54726	4.62737
CGGA_P179	1454	0	9.70211	3.60072	5.9392	5.56782	3.37688	0.0136576	3.63951	0.408432	0.241893	0.990895	0.0537937	4.28752	5.54186	6.23904	3.68032	0.965802	6.15102	3.53329	4.11535	3.71233	3.5945	3.62182	5.834	9.15491	4.52041	3.04359	5.32374	1.50162	3.28926	6.17428	2.97621	5.28255	3.0103	3.30867	4.0669	5.74034	0.35339	0.590231	0.130311	0.0738302	0.556144	4.26344	3.84153	4.77097	5.51325	3.96384	5.35306
CGGA_1731	1976	0	11.8009	2.56774	5.95705	4.37359	4.54769	0.132543	2.6749	2.13633	0.285605	1.93197	0.272073	4.33124	6.10832	6.56772	1.99923	0.0924094	6.01345	5.2257	2.4209	4.47825	3.75628	2.99162	7.23524	8.19663	2.99815	1.62983	2.96568	2.90508	0.921267	4.24536	3.17205	6.9262	4.20056	3.272	3.65535	4.85189	0.762549	0.0734439	-0.00268873	2.34725	0.134515	4.56935	3.47906	3.89353	5.36055	5.11388	4.60113
CGGA_1618	2319	0	12.0734	1.95112	5.31327	4.98747	4.94559	0.132543	1.82395	0.284959	0.101269	0.912212	0.0398427	4.52654	5.79482	6.42961	1.69075	0.132828	5.89232	3.89435	2.41789	3.72512	2.94044	2.14876	7.69346	6.99977	2.80008	1.21232	2.16404	2.78967	1.86963	4.19367	3.02137	6.64497	3.7119	2.83169	3.52759	4.62887	0.00125961	0.137301	0.0650905	0.342035	0.197742	4.40221	3.06446	4.03211	5.00556	4.63658	4.7534
CGGA_703	1355	1	10.6303	2.72918	5.58241	4.62361	4.06887	0.0540532	4.41906	2.49328	0.317458	0.85456	0.0537937	5.05738	6.07566	6.09411	2.08777	0.247672	6.39205	4.11707	3.2136	4.25894	3.59194	2.4992	6.23247	5.14845	3.94738	0.974105	3.09584	4.39482	1.665	4.46751	5.53942	5.40513	7.60238	3.03513	3.76512	5.35311	0.427374	0.0201289	0.0980086	1.6299	0.0683177	4.70368	3.68116	4.58345	5.43142	4.3201	5.16585
CGGA_1160	426	1	12.6058	3.15606	4.95403	6.56364	3.28613	0.0487744	3.43433	2.37969	0.0781413	0.464059	0.0301918	4.53323	6.1697	5.99153	2.81951	0.155897	7.14009	3.7363	3.04085	4.57347	3.40321	1.83721	5.1291	9.14002	4.84432	2.62686	2.53967	4.36955	1.39091	4.47566	3.18647	5.67261	6.30168	3.8013	4.50082	5.32114	0.289509	0.139367	0.31215	0.681951	0.479414	3.44485	3.03397	4.86899	5.06837	3.90818	5.4962
CGGA_1300	1793	1	10.7303	3.19154	5.46025	6.04621	3.65959	0.151707	3.51378	1.27827	0.113581	1.75439	0.160713	4.22184	6.01504	6.48812	2.5152	0.354001	7.25832	4.36919	3.33369	3.66877	4.08474	2.76539	6.24878	9.63172	2.91146	0.757856	4.59466	2.60763	1.11874	4.49733	3.36079	5.60443	4.85576	3.46909	3.18985	5.77109	0.733052	0.186331	-0.00268873	0.159547	0.281751	4.06661	3.18971	3.74398	5.70864	4.46494	5.32394
CGGA_P142	1558	0	10.0801	3.05945	5.57524	6.04755	4.48682	0.170694	4.1544	0.698734	0.173465	1.07292	0.0398427	4.07783	5.01409	6.43794	2.79718	0.146052	6.24221	3.70697	3.16702	3.95514	3.1201	3.00864	5.63509	8.71744	3.78579	1.06444	5.69783	2.16175	1.13763	4.37439	3.1558	5.42667	4.23058	3.19684	3.51209	5.86319	0.439375	0.448591	-0.00268873	0.61024	0.121522	4.11331	3.70093	3.86118	5.6689	3.9034	5.31715
CGGA_1191	3082	0	11.6711	3.2731	6.33108	4.74268	1.37396	0.0936718	1.06889	1.33505	0.230734	1.73122	0.147782	4.20686	5.57117	7.03055	2.54429	0.247672	5.12724	5.07868	3.26486	3.66322	2.96145	2.77893	6.69318	3.47755	3.53365	4.00331	3.95819	1.30634	1.56367	4.20678	1.70064	5.8172	2.88332	2.79054	2.56385	5.49448	0.662003	1.54619	0.4771	0.159547	0.415053	4.55828	3.3454	5.11852	5.06834	4.94923	5.0998
CGGA_1563	2423	0	10.8032	2.95855	5.4206	5.16562	5.02978	-0.00684111	3.75095	0.901941	1.72972	0.657377	0.0398427	4.69004	5.56391	6.40173	2.69105	0.354001	6.65097	4.08704	2.99522	4.36407	3.29722	2.43046	6.03112	5.53006	3.33586	1.75626	2.52975	5.06565	2.39642	4.56844	5.93568	5.71493	4.07983	3.43808	3.67675	5.77219	0.288971	0.23367	0.0483933	2.41767	0.013027	4.33739	3.94099	4.21953	5.38048	4.04504	5.0896
CGGA_D48	221	1	14.0099	2.61504	5.90013	5.50961	2.53057	0.0394878	2.546	0.448617	0.00472327	0.666861	0.0441647	3.77612	5.90273	6.68973	1.66292	0.0520024	6.55562	2.637	2.36767	3.02619	4.3141	2.18623	5.09793	9.67241	3.91275	0.501763	3.51757	2.6658	0.478475	4.31264	2.69322	6.48291	4.44339	2.3167	3.83257	5.07151	0.220601	0.25364	-0.000553072	0.711631	0.183283	3.45266	3.61408	2.83	5.98941	4.5482	4.11225
CGGA_1446	2664	0	6.87906	2.35151	3.42089	3.87258	1.80163	-0.00684111	1.36016	1.11245	0.0379116	0.314248	0.0257529	1.97405	3.38749	2.95813	1.64009	0.17214	3.33851	2.80895	1.13524	1.60044	1.26668	0.951363	2.30858	4.66111	2.69935	0.453219	3.58644	0.713309	0.724541	2.00044	0.72092	3.54249	1.02298	2.31704	3.36791	3.72179	0.0782527	0.00647017	-0.00268873	0.102961	0.054697	1.76985	1.34523	2.724	2.32193	2.12972	2.89478
CGGA_D07	3691	0	9.761	0.734438	4.47939	5.2595	4.51383	0.0579729	0.428703	0.312206	0.393674	1.34832	0.793158	4.10787	4.47957	5.12557	0.820061	0.0248145	4.92811	3.80261	1.95196	2.4942	1.69285	1.72825	6.86948	8.39141	2.50158	2.14781	4.16219	1.40421	1.31912	4.48523	2.30876	6.00858	2.879	2.27526	2.97388	4.4506	0.531664	0.239787	0.0633396	0.323764	0.209239	3.06838	2.9344	2.85025	4.88072	3.49752	3.46222
CGGA_727	1023	1	8.41	2.93658	5.17412	6.22907	4.82517	0.0850566	3.94953	0.226547	-0.0715466	0.959129	0.189784	3.72635	4.77104	4.03947	2.16124	0.0248145	6.75545	4.05834	2.14881	3.82123	3.73444	2.8882	5.90883	8.85189	4.34531	1.09281	2.94546	2.21185	1.26489	3.84003	3.53202	5.19601	3.98306	3.66711	3.83014	4.34252	0.372725	0.0943584	0.042453	-0.135597	0.0173814	3.88979	3.38539	3.115	5.66523	3.95229	4.95281
CGGA_406	90	1	10.5734	4.40668	6.50809	4.63069	3.32095	0.0136576	2.17292	1.06607	0.0762921	1.53697	0.0537937	4.7962	7.13326	6.78944	3.2844	0.146052	6.68699	5.56216	2.75596	3.75863	4.70751	3.34848	6.22783	4.79985	4.0307	1.59632	4.62914	4.31602	1.29677	4.30152	2.34144	5.5057	3.20967	3.29469	3.51209	5.46626	0.249019	0.149724	-0.00268873	0.699422	0.0951706	4.08166	3.47536	4.53006	5.32224	4.65963	5.08796
CGGA_884	1131	1	9.39886	3.52651	5.25527	5.3363	3.20418	0.00142661	2.51135	0.796585	0.583622	1.69844	0.0987801	3.61024	6.02581	6.01546	3.55829	0.143312	6.36675	2.08783	2.63482	3.96203	3.51439	1.88322	5.912	6.17416	2.93405	1.31589	3.69297	1.83033	0.511276	3.13715	2.09555	5.58714	2.46263	2.4006	3.42327	5.15984	0.433726	0.280998	0.0838358	0.718951	0.0463326	3.71561	3.80343	4.75773	3.83278	4.31363	4.67714
CGGA_P147	863	1	10.2382	3.96917	6.69054	5.31548	3.17407	-0.00684111	5.13387	1.70055	0.137864	1.43802	0.318888	4.74304	6.28692	6.93143	3.35438	0.331044	6.83916	5.64631	4.22252	3.89782	3.76638	3.38125	5.47113	7.88894	5.1367	1.60055	5.99819	3.21755	1.22832	4.51381	3.4496	5.63768	6.077	3.30588	3.9967	6.44415	0.235473	0.909041	0.0980086	1.10082	0.210054	4.13328	3.80116	4.0054	5.44477	3.75581	5.40107
CGGA_1303	2861	0	6.89263	2.22444	4.20996	4.5155	2.47892	-0.00684111	2.10101	1.26078	0.113581	1.28873	0.0398427	2.87289	3.96546	3.05605	1.17661	0.515382	3.98525	3.09502	1.62289	2.17292	1.3491	1.03221	3.60235	6.22566	3.57591	0.803915	3.29483	1.38657	2.28526	3.62529	2.27698	3.92309	1.52303	2.40501	4.0835	3.25813	0.498045	0.174237	-0.00268873	0.187044	0.0270543	2.40301	1.81855	3.39276	2.75752	2.86162	3.26101
CGGA_1591	1133	1	10.1735	3.75318	5.6668	5.68652	3.46432	0.0136576	2.76467	0.551377	0.185121	0.495638	0.0676086	4.05944	5.60513	6.70182	4.02811	0.17214	6.28301	4.28225	4.5782	3.65541	3.40508	3.75795	5.61102	7.20239	3.64015	2.04155	6.08482	1.98233	2.31721	5.38456	2.71391	5.25457	4.03517	3.54286	3.94024	6.07465	0.249019	0.487813	0.130311	1.61965	0.382891	3.82876	3.51308	4.34702	5.34624	3.71108	5.38892
CGGA_1445	2664	0	8.26791	2.50719	4.74004	3.26423	8.36749	-0.00684111	2.10966	0.975665	0.149839	0.214568	0.0398427	2.68216	4.47381	2.66094	0.894787	0.0224062	3.15011	4.2572	1.06869	1.97123	2.22638	0.884774	3.25532	1.74738	2.60161	0.556431	0.953805	2.23535	0.707504	2.52028	0.654848	3.59381	3.16706	1.21912	2.88541	3.37014	0.327937	0.00647017	-0.00268873	0.0738302	0.013027	2.57897	1.55401	4.17499	1.83017	2.45788	4.24459
CGGA_J023	1028	1	13.7634	4.88315	6.78252	3.25981	2.81158	0.0394878	1.66551	2.11208	-0.0521997	0.919193	0.164346	3.88301	7.27605	7.36133	3.26541	0.0520024	6.46951	5.52181	3.07553	3.72651	5.18955	3.75177	5.05627	5.3056	3.83073	2.25143	3.71444	2.60334	1.05987	4.49159	1.02901	6.35461	3.21719	2.41582	3.55701	5.61007	0.081239	-0.0157711	0.0211608	-0.108562	0.0173814	4.42949	2.23884	4.80114	4.51044	5.37624	4.51422
CGGA_1014	263	1	10.3186	2.54605	5.15282	4.42038	4.85269	0.334136	2.76467	0.397644	0.196674	0.829155	0.0537937	4.84288	5.74276	5.91995	1.68522	0.525521	6.73491	4.17123	3.08667	3.87625	3.48393	2.49361	6.91655	5.57137	3.42115	3.18405	3.40201	2.17542	2.99541	5.14909	4.63021	6.10536	4.63403	3.12017	3.11953	4.45052	0.509522	0.507012	0.253803	0.17336	0.961699	4.62421	3.39769	4.62472	4.62518	4.5991	5.15696
CGGA_1675	2154	0	11.2339	3.20631	5.27094	4.6718	3.6551	0.0540532	4.73315	1.24307	0.125779	1.44934	0.0398427	4.95802	6.20976	6.44316	2.95762	0.17214	6.9903	5.11745	3.54238	5.16317	3.86117	3.94802	5.80309	3.39337	3.76491	1.92645	3.05043	2.72015	0.609794	4.03906	4.82311	5.77593	5.89533	3.17848	3.35854	5.77465	0.520916	0.0470452	0.0315332	0.102961	0.3276	4.47678	3.8617	4.17972	5.43695	4.05375	5.23074
CGGA_1295	310	1	10.9393	2.89769	5.71812	5.28054	4.66883	0.0339544	5.13285	1.83551	0.241893	1.38008	0.121558	5.11653	6.14522	6.36082	2.38222	0.0786793	7.15669	3.98278	2.86517	4.4468	3.76415	2.69786	5.9854	6.94396	3.26189	0.362597	4.35444	3.23196	0.741367	3.76075	5.32411	6.01783	6.71978	3.15673	4.33707	5.50127	0.474838	0.0734439	0.223748	1.01803	0.013027	4.59122	3.29086	4.60011	5.40815	4.58873	5.27734
CGGA_541	4376	0	7.5789	2.33302	5.34815	4.71218	3.83083	0.102701	1.13617	0.779219	0.439167	1.70218	1.07564	4.15356	4.41327	6.51923	1.38224	0.785361	4.00214	0.675698	4.10243	1.93779	1.8659	2.85311	7.77288	7.45302	4.19656	3.04571	3.91096	1.40421	4.62167	7.98206	2.43908	3.73456	1.8851	3.61204	3.66104	3.99791	0.759776	1.19963	0.436711	0.506065	0.699135	4.68402	2.1386	4.95341	3.08339	4.64188	4.96972
CGGA_671	4215	0	8.27378	2.81419	4.94674	5.32631	3.30481	0.0301116	2.1822	0.42672	0.250507	0.473553	-0.0417113	3.42503	4.4575	6.45073	2.36368	0.408127	4.52353	3.33621	4.28046	2.9384	2.39857	3.5028	6.15601	7.97271	3.84413	2.56255	5.32011	1.02225	3.32388	6.52038	1.89979	5.26285	2.01683	3.49021	3.89832	5.30285	0.0925452	0.496653	0.0318586	-0.0432277	0.284526	3.92634	3.08462	3.82988	5.01222	2.85827	4.85484
CGGA_P18	387	1	10.3274	3.68765	5.98984	6.34745	3.99496	0.0540532	4.50613	0.212748	0.125779	1.49926	0.223658	4.32667	5.84363	6.56119	3.74049	0.106009	6.84944	4.06837	3.87897	4.19823	3.90608	3.40909	5.55868	5.34718	3.85317	0.112097	4.98048	2.98337	1.16241	3.92793	3.01147	5.67141	4.53177	3.50174	4.07008	6.08964	0.249019	0.660192	0.081628	0.26658	0.304862	4.2616	3.93156	4.12183	5.72483	3.99831	5.44911
CGGA_P177	1442	0	9.68752	3.64897	6.11566	5.20535	4.3078	-0.00684111	4.36025	0.626982	0.0508303	1.72185	0.121558	3.98396	5.89302	6.08389	3.42668	0.565379	6.86268	5.09079	3.67946	4.00149	4.25933	3.36995	5.23962	5.36714	4.84986	1.22349	5.8642	2.1128	2.21053	4.15191	3.96896	5.13518	4.59469	3.44184	3.73799	5.89163	0.619919	0.033653	0.0483933	0.117313	0.17279	4.40386	3.36846	3.96547	5.05414	3.71013	6.26359
CGGA_724	4147	0	11.1402	2.40452	5.67679	5.33847	4.23928	-0.00684111	2.31415	0.783567	0.173465	0.920269	0.0537937	4.32471	5.38374	6.65658	2.09184	0.463579	5.65551	3.60618	3.02201	3.5299	2.72422	2.67616	7.2935	9.27237	2.6788	2.59043	4.66664	2.35396	2.77542	5.92874	2.96425	6.25978	3.20784	3.21343	3.61927	5.19441	0.340715	0.72676	0.0483933	1.15118	0.338833	4.48091	3.37249	4.17769	5.61282	4.60051	5.33674
CGGA_D04	3697	0	10.999	2.68485	4.60149	6.54274	3.93067	0.00142661	2.14898	0.239086	0.0233367	0.715028	0.00184609	3.69964	6.20667	6.32425	2.77257	-0.0454878	6.08811	3.23539	2.54139	3.5835	3.51061	2.81956	5.0532	8.13203	2.42069	0.676421	2.61821	2.27864	0.988232	3.97322	1.92444	6.31836	3.73049	2.61672	3.47052	5.17671	0.289509	0.307903	-0.000553072	0.556324	0.00269431	3.97151	3.535	3.20417	5.27768	3.5575	4.37057
CGGA_P172	1049	1	6.35545	1.62015	3.66947	4.24278	1.79402	-0.00684111	1.85526	0.308229	0.0379116	0.277643	0.0537937	2.78435	4.15591	2.79634	1.26362	0.185008	3.53828	3.34134	1.03409	2.32324	1.3491	0.845119	2.57545	3.28363	2.91799	1.14332	3.18249	1.08655	1.14387	2.41531	1.86673	3.46396	1.00628	1.55877	3.2711	2.96963	0.122708	0.00647017	0.0483933	0.159547	0.013027	1.91447	1.6676	3.62653	2.16917	2.35951	2.8776
CGGA_807	4040	0	8.02698	1.62562	5.15642	4.52759	2.46894	0.00142661	1.00066	0.149051	0.0233367	0.529133	-0.0125318	4.15704	4.21261	6.67484	1.23502	0.354555	3.79277	1.05632	4.07069	1.61272	1.73093	3.10617	8.31101	8.25255	2.89304	3.48345	3.734	0.980766	4.39534	8.00164	1.53934	4.55654	1.45777	3.28886	3.96391	3.91559	-0.000993783	0.95	0.244127	0.636185	1.01636	4.64347	1.48049	5.13929	3.50304	4.26925	4.98656
CGGA_290	4725	0	9.18293	3.96647	6.59179	5.41105	2.51865	0.132543	3.71662	0.386773	0.0762921	1.14376	0.223658	3.99162	5.41783	6.55366	3.89475	0.0648166	5.78087	5.21511	4.29125	3.79333	3.57001	3.70324	4.55473	6.03735	5.74453	1.27802	6.1467	1.48496	1.88417	5.50785	1.83512	4.98211	3.85539	3.38029	4.17538	6.646	0.249019	0.544623	0.0650905	0.145603	0.415053	3.85215	3.88868	3.81914	5.52439	3.26531	5.28994
CGGA_625	2465	1	11.622	2.15584	5.54738	5.11101	4.89809	0.0540532	2.39754	2.0419	0.185121	0.944184	0.0398427	4.1712	5.28702	6.63345	1.94581	0.0508186	5.48728	4.35612	2.57405	3.51005	2.88195	2.34532	7.52054	9.97817	3.0758	1.06444	4.96042	2.26756	0.749703	4.37101	2.91887	6.98466	3.72346	3.01076	3.29103	4.98072	0.439375	0.478112	0.297928	0.145603	0.160147	4.47056	3.11967	3.91189	5.65342	4.93311	5.10142
CGGA_1226	670	1	10.0676	2.80286	5.1419	5.78584	4.87314	0.0540532	3.85804	0.589687	0.113581	1.66436	0.186228	4.1712	5.35086	5.95097	2.26658	0.159155	7.08383	3.27848	3.5848	3.50128	3.37366	2.84458	7.0446	8.22497	3.11585	1.96265	4.29759	2.90104	2.58615	5.71644	4.78195	5.45054	3.56404	2.75878	3.17761	5.00298	0.498045	0.553866	0.0650905	1.13697	1.08556	4.14686	3.09153	3.71053	5.47836	4.47015	5.01485
CGGA_P93	1678	0	10.1953	3.46014	5.5437	5.55463	3.69498	0.132543	5.16526	0.75865	0.125779	1.42087	0.108262	3.92986	6.22622	6.35639	3.43689	0.331044	6.67161	4.63052	3.47336	3.92725	4.20716	3.30891	5.16966	7.76819	4.81073	1.14332	5.09613	3.30936	1.29677	4.29937	4.2567	5.56661	4.90626	3.52657	4.13136	6.09876	0.365964	0.00647017	0.268637	0.240543	0.304862	4.15427	3.8869	4.09837	5.63131	3.95527	5.60333
CGGA_1653	2217	0	11.9425	1.73338	5.36631	3.13751	5.47255	-0.00684111	2.34372	0.95395	0.408624	1.04361	0.295674	3.97968	5.50491	5.698	1.32346	0.0366828	4.39845	3.58068	2.46529	4.10632	2.93194	1.73333	8.86489	6.79623	1.96427	2.3916	1.79661	2.39233	0.853671	3.88344	2.65681	7.24172	2.82017	2.45501	3.37987	3.72865	0.427374	0.634373	0.0315332	0.640572	0.22226	4.69245	2.545	4.34702	4.08055	6.28431	4.03281
CGGA_P108	1644	0	9.56345	4.04427	6.08921	4.97679	2.90943	-0.00684111	4.39082	1.33505	0.306926	1.89893	0.590425	3.50324	6.0434	6.68634	4.64409	0.0786793	6.43734	3.43867	4.38133	3.45127	4.10467	3.8734	5.56938	5.75015	5.01819	0.9607	5.97617	1.5716	1.15626	4.59378	3.34539	5.36205	3.51464	3.33345	3.97303	6.1342	0.340715	0.544623	0.924452	0.145603	0.584625	4.24798	3.89844	4.16071	5.59047	4.02965	5.80802
CGGA_283	3470	1	10.322	2.31483	5.34192	5.19224	3.63454	0.0394878	2.50549	0.593605	0.00472327	0.556071	0.0160864	4.1185	4.58382	6.55808	2.1103	0.0654063	4.44552	3.67298	3.11808	3.82245	2.05361	2.68669	7.34552	8.87646	3.08203	1.81223	5.29969	1.41335	2.06483	5.3559	3.15169	4.92586	2.93254	2.51105	3.67578	4.94178	0.168874	0.566423	0.0211608	-0.082052	0.332703	3.88519	3.43558	4.0818	4.54705	3.87593	4.36359
CGGA_1121	3278	0	12.4613	2.4873	5.77001	5.34882	4.83731	0.0136576	2.3216	1.30694	0.0379116	0.732124	0.0676086	3.96762	6.10494	6.67536	2.10799	0.222934	6.32424	3.98642	2.45066	3.60641	3.29078	2.51031	6.56234	6.75762	2.56272	0.652428	0.843122	3.03016	0.884128	3.85055	3.3101	6.60022	4.05767	3.09739	3.35585	5.18749	0.509522	0.210205	-0.00268873	0.26658	0.0270543	4.40166	3.57391	3.85946	5.58353	4.64204	5.21493
CGGA_762	4105	0	8.63016	2.13015	5.30327	4.4512	2.90624	0.00142661	2.42409	0.55358	0.166214	0.925933	-0.0417113	3.71795	4.12622	5.16225	2.2179	0.205164	2.97188	3.71876	2.87156	2.88808	1.87135	2.03091	5.82544	9.70166	2.89452	1.73361	5.02149	2.13922	1.94094	5.32402	2.58341	4.78989	2.17919	1.77749	3.10513	4.73279	0.416608	0.267377	-0.000553072	-0.135597	0.129988	3.21883	2.7671	4.00307	3.87497	3.35106	3.95345
CGGA_1645	1996	0	11.2404	3.61266	6.49585	5.35544	2.88021	0.0339544	4.46244	0.375817	0.0888399	1.44369	0.121558	3.84416	6.26347	6.55604	3.05265	0.159155	6.41062	5.30928	3.24747	3.84274	4.01381	3.21318	5.95991	7.03804	3.25682	1.25647	4.00485	3.13982	1.15007	3.95335	3.71495	5.46336	3.61181	2.68143	3.37723	5.87762	0.35339	0.590231	0.146239	1.43929	0.456826	3.86835	3.86623	4.4717	5.382	4.65289	5.39661
CGGA_269	2932	0	9.01279	2.3842	4.52981	4.89807	5.45463	0.00142661	4.9943	0.670608	0.183365	0.691164	-0.02705	5.99126	6.74703	5.65702	2.4317	0.241039	5.96735	3.37843	3.11302	3.38408	2.46341	2.20594	6.06507	8.15109	2.44809	0.191079	3.51383	4.49526	0.808035	4.01875	4.89215	5.37112	6.50734	2.65553	3.74894	6.00165	0.18983	0.1095	-0.000553072	0.35271	-0.0271169	4.30723	3.88812	2.78892	4.67032	2.32038	4.40234
CGGA_1264	2929	0	10.6655	3.06311	5.77565	5.45028	4.58191	0.189508	3.22493	1.31825	0.306926	1.35025	0.0676086	4.52262	5.79963	6.54791	2.24867	0.210403	6.00497	4.76324	3.30507	4.05041	3.35228	2.754	6.58793	9.23644	4.04697	1.39087	5.05362	2.34194	1.74338	4.46751	3.65901	6.09916	4.27141	2.9642	3.27968	5.46591	0.327937	0.356015	0.19316	0.482241	0.134515	4.43633	3.48643	4.34346	5.62609	4.76316	5.46552
CGGA_P508	377	1	10.51	3.39985	5.39978	5.76669	2.52299	-0.00684111	3.71384	1.22514	0.113581	0.463261	0.0398427	4.44876	6.29124	6.58871	3.25799	0.146052	6.88421	3.47095	3.70879	3.87531	4.3342	3.78908	6.25738	8.07706	3.8333	3.16252	3.75562	3.0772	2.10711	5.78815	3.06186	5.68971	3.72602	2.98411	4.06372	6.01735	0.262449	0.710418	1.89588	0.117313	0.477258	4.19586	4.03318	4.10909	5.87552	4.12065	5.33272
CGGA_1517	2530	0	11.4233	2.39224	5.71088	4.50838	4.40243	-0.00684111	1.90095	1.21911	0.063623	1.18472	0.0537937	4.31815	5.55721	6.70838	1.98166	0.197762	5.14119	4.46564	2.66695	3.49371	2.74902	2.5959	7.65289	8.29658	2.5227	2.18968	4.36159	2.0731	0.971618	4.27337	2.03524	6.72665	3.47721	2.94398	3.05042	5.03663	0.80104	0.478112	0.081628	0.279428	0.108408	4.58838	3.23832	4.05976	5.61809	4.88534	5.05679
CGGA_P416	1069	0	10.2675	3.40545	6.13332	5.24459	2.91424	-0.00684111	2.85931	0.863578	0.0248644	0.384873	0.0398427	4.49714	5.87931	6.9159	3.3262	0.222934	5.8911	5.84763	3.64124	3.66322	3.62103	3.50714	6.44722	7.10893	4.01132	2.48131	5.27734	1.29357	1.53128	5.68572	2.26254	5.82378	3.93267	3.24889	4.16802	6.18201	0.0631516	0.487813	0.0315332	0.187044	0.270052	4.13122	3.89312	3.91355	5.77656	3.97004	5.33775
CGGA_810	551	1	10.653	3.74571	5.65504	4.58697	4.07538	0.0136576	4.11717	1.18238	0.101269	0.484923	0.211291	6.06702	6.79665	6.12842	2.99483	0.484525	5.9633	5.49766	3.39479	4.70337	3.87973	2.7425	6.2334	4.57912	4.97403	3.16793	4.00994	5.48043	0.845949	3.99736	6.76117	5.29996	9.42633	2.93655	3.86201	5.58322	0.651587	0.0470452	2.1672	1.66023	0.197742	4.41857	3.49861	4.37918	5.25941	3.89769	5.25354
CGGA_D44	313	1	9.98922	3.6518	5.99368	4.4699	4.61347	0.0301116	1.34301	1.9196	0.299398	1.89346	0.688687	3.90897	5.88614	3.57523	2.92654	0.0384726	6.12023	5.12918	1.55336	3.70855	3.69776	2.40913	4.76582	3.65272	4.67776	1.82316	0.581164	3.66744	1.75143	2.24967	2.4725	6.29861	1.91023	2.76839	3.51504	4.88704	0.883274	0.779501	0.465759	1.48608	0.521823	3.66212	3.65089	4.81806	2.90856	5.36625	4.15274
CGGA_1131	3251	0	10.4759	4.09335	6.51438	4.97187	2.2515	-0.00684111	3.07368	0.531823	0.196674	1.57374	0.272073	4.10687	6.32029	6.93534	3.67911	0.0366828	6.93004	5.12726	3.91658	5.15213	4.37531	3.13896	6.06767	4.58345	3.35808	2.65079	4.86562	1.7672	0.73298	4.30721	2.85894	6.03238	3.05163	3.52657	3.03855	5.60805	0.403096	0.124765	0.146239	0.329725	0.0270543	4.30513	3.68325	4.39868	5.19709	5.21532	5.51725
CGGA_1018	2527	1	10.7828	3.71865	6.19847	5.24097	2.68369	-0.00684111	1.82922	0.791776	0.161705	1.33206	0.0676086	4.1092	5.56178	6.80459	2.71651	0.271991	6.22036	4.47263	3.7951	3.73884	3.38572	3.237	5.94996	4.84423	3.84988	2.5529	4.51668	1.44528	2.44519	4.64742	2.8682	5.69964	3.43722	3.28905	2.95058	5.69029	0.315055	1.17346	0.0145069	0.709005	0.446498	4.33739	3.75452	4.43016	5.31166	4.42999	5.52332
CGGA_763	319	0	9.33306	2.9466	5.66205	5.24531	2.80585	0.0339544	3.36338	0.162463	0.208125	0.879541	0.08129	5.02751	5.19787	5.92999	3.04482	0.641919	5.25656	2.63336	3.74509	2.61543	3.09403	3.13726	6.33253	9.0253	4.09829	3.25686	4.42659	2.62251	3.37666	6.54328	3.68727	5.16966	2.86721	2.91208	3.81107	5.37798	0.486484	1.10737	0.0650905	0.765231	0.393693	4.23295	3.05932	4.83874	5.06126	4.21384	5.2431
CGGA_1760	459	1	11.002	2.29622	5.30736	4.773	5.69745	0.0540532	3.70406	2.23954	0.0508303	0.407693	0.0398427	4.51079	5.73401	6.01576	1.91361	0.0648166	6.70321	3.99998	2.77901	3.30778	2.83225	2.35472	7.31011	6.4794	3.35335	1.58781	2.37662	2.59762	1.67768	4.82281	3.86733	6.08376	5.14098	2.90255	3.53233	4.69833	0.565686	0.149724	0.081628	0.5153	0.0951706	4.63744	3.28799	3.95188	5.32987	4.18288	5.00303
CGGA_D29	3643	0	9.44874	1.86655	5.27824	4.97368	2.63439	0.00142661	1.53862	0.734909	-0.0910861	0.761505	0.0160864	4.11496	4.83837	5.13436	1.83391	0.205164	3.68556	3.96557	2.11636	2.79577	1.98514	2.17204	6.02555	9.46752	2.59121	0.698351	5.39809	1.78076	0.988232	4.37825	2.00813	5.75716	2.74565	1.90806	2.67692	5.08987	0.270217	0.423758	0.0318586	0.0432862	0.222051	3.06548	3.01764	2.74173	5.81513	3.04258	3.6874
CGGA_P17	1930	0	9.85307	3.44669	6.12112	5.85589	3.77041	-0.00684111	4.10454	1.09936	0.196674	1.17119	0.0676086	4.10454	5.07269	6.49283	3.10052	0.17214	6.23646	4.38214	3.79406	3.95691	3.46149	3.42957	5.60729	8.74271	4.00741	1.26729	6.02571	2.24832	1.83634	4.7879	3.53398	5.5434	4.48272	3.21343	4.25588	6.04764	0.137252	0.334566	0.081628	0.413808	0.121522	4.27446	3.71429	4.25689	5.67609	4.11859	5.50912
CGGA_864	3977	0	8.63166	2.41686	4.92419	5.50796	4.68354	0.00142661	2.85526	0.543405	-0.0330414	0.52003	-0.02705	4.01859	4.02158	6.61729	3.26816	0.241039	4.697	2.54743	3.04783	3.0152	2.09317	3.03846	6.74551	8.87893	3.33085	1.04073	4.23585	2.03272	2.06483	5.91224	2.5947	5.11315	2.85787	2.83827	3.657	5.6485	0.168874	0.484729	0.451331	2.29224	0.296715	3.59784	3.69079	3.57615	5.14527	3.83962	4.62922
CGGA_1398	554	1	11.9775	3.00332	6.26963	6.25839	4.19977	0.263091	3.87306	0.799937	0.657439	1.60964	0.108262	4.21971	6.64943	6.65349	2.41119	0.259883	6.32511	5.60076	3.01442	3.55791	3.97731	2.77669	5.76231	7.01811	2.72461	0.953949	3.04843	2.7654	0.999577	3.64906	3.46973	5.69656	4.38901	2.93841	4.29742	5.49482	0.498045	0.23367	0.253803	0.117313	0.0951706	4.2171	3.86714	4.62806	5.46453	5.05077	5.19252
CGGA_1791	855	1	6.29797	2.17059	3.29655	4.1608	2.44023	0.0540532	3.60836	1.48282	0.0379116	0.373332	0.0398427	2.26028	3.33568	2.61343	1.16841	0.319426	3.44064	2.23799	1.19079	1.78034	1.22741	0.761948	2.4206	5.24362	3.3675	0.781079	3.01385	1.66795	1.16854	3.12379	1.59007	3.44252	2.10855	2.24841	3.55923	3.12207	0.0782527	0.221988	0.0145069	0.145603	0.108408	1.86382	1.44779	2.47042	2.33658	2.1689	3.37172
CGGA_P520	884	0	11.3572	3.46282	5.91173	5.58197	1.9141	-0.00684111	3.48789	1.31261	0.063623	0.516838	0.295674	4.30625	5.96396	7.24531	3.75425	0.723411	6.74707	6.15785	4.50783	3.83788	4.0529	3.19055	6.17819	3.67536	5.07984	1.68658	5.57032	2.0804	1.32974	5.16464	2.73446	6.33146	4.08681	3.88791	3.92088	6.57702	0.0631516	2.15396	0.0483933	1.13697	0.281751	4.36373	3.91598	3.54222	5.67202	4.14106	5.58319
CGGA_888	669	1	10.6742	4.1168	6.61359	4.99101	1.80919	0.0540532	2.67201	3.04606	0.149839	1.73588	0.295674	3.9236	5.82715	6.76611	3.77799	0.0366828	6.16863	5.25128	4.20057	4.08472	3.90708	3.57548	5.63229	4.20733	5.20805	1.30449	3.04642	1.87259	1.82128	4.1487	1.66932	6.0716	5.60889	3.37502	3.54175	6.29101	0.486484	0.0201289	0.0483933	0.699422	0.108408	4.12368	3.77319	4.41508	5.6429	4.15849	5.67694
CGGA_1875	1558	0	12.3124	2.16323	5.562	4.34879	5.28504	-0.00684111	3.57343	3.19026	0.0508303	1.27612	0.08129	4.27465	5.8202	7.31451	2.09994	0.235356	5.58697	4.50955	2.52776	4.37058	3.10713	2.35783	8.05959	5.53416	3.08928	2.08976	2.69911	4.14281	0.681543	4.42145	3.7071	6.93769	5.91817	3.31836	4.1878	5.01446	0.302067	0.397933	0.0650905	2.22976	0.0270543	4.76572	3.54853	3.98128	4.81616	4.85502	4.96916
CGGA_1235	3004	0	10.6576	2.51	5.34205	5.54812	5.10559	0.0739577	3.53289	0.249316	0.149839	1.37416	0.0948405	4.61508	5.28363	6.26816	2.01225	0.210403	6.05544	3.81322	2.62648	3.84274	2.96145	2.38555	6.82377	9.22547	2.95443	1.33047	4.55586	2.94281	1.35662	4.43827	4.95888	5.98752	4.746	2.92344	3.26536	5.22929	0.474838	0.377134	0.081628	0.102961	0.054697	4.47264	3.26632	4.03211	5.36085	4.7293	5.23875
CGGA_1334	146	1	9.75557	2.64848	5.5434	5.25215	5.07962	0.0540532	3.0889	0.440309	0.230734	0.967722	0.223658	5.12951	5.66235	6.09938	2.01225	0.222934	6.6941	3.79032	2.20169	3.84565	3.15465	2.36404	6.66765	7.1175	3.47423	0.565441	2.47953	3.03567	1.19876	4.54022	5.78508	5.39028	3.87164	2.5444	3.15436	4.91687	0.302067	0.418421	0.0483933	2.52156	0.013027	4.15494	3.49497	4.83834	5.07265	4.57779	4.93805
CGGA_1614	1079	1	11.0346	2.27949	5.75555	5.05433	5.49822	0.170694	3.44142	0.808052	0.113581	0.732124	0.121558	4.56942	6.06046	6.76434	1.76063	0.210403	6.39794	4.07689	2.70619	3.8232	2.96562	2.7309	6.54303	5.41858	2.84435	1.22349	1.87261	2.83275	1.83259	5.34094	4.45057	6.37446	4.8881	3.0941	3.70408	5.24181	0.651587	0.438608	-0.00268873	0.253619	0.425613	4.82011	3.61105	4.17364	5.40755	4.72463	5.38377
CGGA_J042	1409	1	11.1824	2.7569	4.38195	5.63066	4.04886	0.0301116	3.99096	2.58333	0.166214	0.878015	0.085313	4.92687	5.77411	6.89112	3.16983	0.298915	6.75335	5.22842	3.0233	3.36574	3.7469	2.71348	4.71296	7.04636	3.55503	1.93367	4.86666	2.88269	0.316244	3.55053	4.10471	5.72081	6.36909	3.23744	3.42018	5.83882	0.230687	0.460614	0.190189	0.147024	0.367851	3.73246	3.46326	3.56001	3.97388	4.02132	4.34154
CGGA_243	2977	0	8.64073	3.67921	6.34067	5.38861	1.46294	0.00142661	2.54885	2.37969	0.0233367	1.01686	-0.0565184	3.12572	4.58665	7.47322	3.08751	0.117809	5.33812	5.30316	3.87287	3.9139	3.2045	3.29238	4.51687	5.71149	3.75767	1.58296	5.39783	0.881597	1.7255	3.39348	0.967647	5.66689	1.8393	3.54044	3.47502	6.17286	0.407957	1.03753	-0.000553072	-0.082052	0.183283	4.68951	3.76002	3.48119	4.66149	3.58999	5.54757
CGGA_1157	727	1	11.154	1.92029	5.23383	5.14664	5.45283	0.151707	2.10534	0.123535	0.0379116	0.887776	0.0398427	5.16257	5.78846	6.08778	1.61107	0.197762	6.41948	3.35589	2.34337	4.03374	3.02449	2.51308	7.73239	6.05003	2.71456	1.76379	3.4987	2.42398	1.62187	4.33673	3.3923	5.83309	3.79702	2.46316	2.79059	4.38693	0.80104	0.301752	0.0315332	0.62042	0.121522	4.4459	3.19281	4.18644	4.82433	5.0713	4.74149
CGGA_1552	2432	0	11.2103	2.47001	5.6243	5.12101	4.61738	0.0339544	2.24921	1.36804	0.113581	1.35025	0.0948405	4.41383	5.37603	6.64819	2.10397	0.409836	5.54656	4.71	2.96787	3.83691	3.01052	2.5268	7.09629	9.66621	3.58927	1.44873	4.47856	1.80322	0.572451	4.45297	2.59716	6.54269	3.89113	3.24743	3.12433	5.20086	0.682631	0.923193	-0.00268873	0.117313	0.0270543	4.38729	3.42626	3.93733	5.54105	4.76068	5.01572
CGGA_565	3605	0	8.17272	1.65717	5.17793	4.68391	3.84123	0.178358	2.41632	0.175327	0.4541	0.952556	0.0301918	5.11202	5.15746	4.68909	1.50266	0.489903	3.56651	3.03704	3.02858	2.81418	2.03858	2.08491	6.24166	9.69952	4.45433	2.1567	3.13899	2.10452	3.55552	7.24811	3.22852	5.21348	3.26061	1.98896	3.33937	4.61725	0.168874	0.676447	0.152698	0.135879	0.379386	3.74923	2.15176	4.70715	4.55955	4.13776	4.56558
CGGA_1725	1983	0	11.1588	3.44262	6.27135	5.03058	2.63298	0.0540532	2.18524	3.02779	0.063623	1.15067	0.0537937	4.54706	5.88168	6.84588	2.35923	0.0924094	6.17039	5.21511	3.26014	4.1811	3.23467	3.07098	6.43424	5.36147	4.13801	2.41983	4.48511	1.5716	1.51715	4.38045	3.13783	6.17188	4.49626	3.28481	2.95964	5.72141	0.781912	0.23367	-0.00268873	0.792558	0.0951706	4.67893	3.74857	4.43515	5.66529	4.38684	5.57051
CGGA_1568	345	0	11.9124	1.98124	4.87776	4.10839	5.42714	0.0540532	2.36909	1.54169	0.0508303	1.04361	0.0537937	4.25337	5.81271	6.10847	1.75539	0.197762	5.37187	3.10201	2.4209	4.23542	3.17777	2.21303	7.89206	8.83479	3.18726	0.993969	2.44605	2.15141	1.94428	4.92845	3.02137	6.89291	3.92379	2.93655	3.99335	4.3396	0.520916	0.418421	0.0315332	0.102961	0.121522	4.39007	3.08144	4.17093	4.92404	5.21504	4.58271
CGGA_780	923	1	10.3208	2.57845	5.82994	5.37415	4.24385	0.0739577	2.95041	0.551377	0.437656	1.06564	0.0948405	4.71199	5.6365	6.40773	2.30857	0.740908	6.31764	3.06844	3.34259	3.17599	3.00045	3.08522	6.50187	8.02492	3.45676	3.91208	3.95185	2.99851	4.03062	6.69445	4.12813	5.57733	3.63647	3.23865	3.54526	5.09299	0.587603	0.797982	0.0650905	1.61449	0.825898	4.42182	3.47413	4.74815	5.44736	4.52561	5.23001
CGGA_1152	3201	0	11.5272	1.938	4.74467	4.40779	6.77223	-0.00684111	3.49441	3.44196	0.149839	0.837672	0.0257529	4.97977	5.41715	6.0711	1.66848	0.106009	6.06059	4.15769	2.26432	3.86962	3.01453	2.11538	7.75878	7.98004	2.8603	0.734235	2.62242	3.90427	0.514446	3.92507	4.69984	6.78038	6.64343	3.14572	3.833	4.71669	0.0631516	0.00647017	0.0483933	0.159547	0.0270543	4.73299	3.11146	3.79849	5.27939	4.82042	5.10304
CGGA_1557	2427	0	12.2257	2.30945	5.76022	4.55237	3.85329	-0.00684111	1.05082	2.23073	0.0248644	1.09452	0.0398427	4.47696	5.52258	7.02836	2.23781	0.271991	5.13266	3.97365	3.268	4.25327	2.6415	2.51583	7.85336	6.78777	3.17471	2.01366	3.73848	2.17202	2.1701	4.89719	2.52283	6.96275	3.28438	3.22684	3.30369	5.06608	0.829305	1.06993	0.081628	1.5404	0.270052	4.65858	3.19435	3.95107	5.13626	5.3111	5.27593
CGGA_1330	2846	0	10.7355	2.16106	3.78731	6.60973	4.01657	0.0850566	2.97639	0.952313	0.233935	0.730703	-0.0125318	4.62474	6.03705	6.27439	1.76785	0.276042	7.79299	4.32141	2.53916	4.11024	3.73102	2.39119	6.38542	9.40868	4.0091	0.977795	3.38065	2.89508	0.500414	4.62658	3.73882	6.49441	5.01578	3.46273	3.58397	5.42243	0.299042	-0.0157711	0.042453	0.754975	0.116365	4.74037	3.86805	2.52701	6.5474	3.82862	5.1763
CGGA_1610	1058	1	12.4132	1.17253	4.26177	2.31985	6.24419	-0.00684111	2.75376	2.25988	0.817266	0.474132	0.471529	5.17677	5.36581	4.6656	1.20893	0.0224062	3.26007	2.55203	1.80447	3.85721	2.35253	1.21081	9.01375	7.7589	1.72123	0.884543	1.31908	2.5095	0.0754725	2.53144	0.877175	6.98498	3.68194	1.90024	4.55823	3.25016	0.00125961	0.00647017	-0.00268873	0.792558	0.761071	4.2616	2.35002	4.10123	2.4967	5.79817	2.65022
CGGA_P165	598	1	6.68109	1.47083	3.62687	3.38411	1.35265	-0.00684111	1.15597	0.541634	0.0508303	0.452312	0.0257529	2.85649	3.36435	2.62719	0.863994	0.0924094	2.63792	3.78716	1.62289	2.24369	1.11063	0.684493	3.15566	4.74632	3.14192	0.660832	2.93987	0.457692	0.64614	2.63036	0.868958	4.03876	1.43218	1.31627	3.00928	3.20957	0.137252	0.0201289	0.146239	0.0738302	0.185321	2.35479	1.5985	3.31103	2.22223	2.60725	3.09458
CGGA_1701	1696	0	11.8295	2.09895	5.59574	4.50383	4.40445	0.0739577	1.13898	1.3406	0.0508303	1.43233	0.0257529	4.3798	5.38374	6.62582	1.83194	0.723411	4.32828	4.72219	2.26092	4.17434	2.36582	2.41863	7.61185	7.60668	2.50224	2.61691	3.51899	1.72553	1.80605	4.76859	1.68283	6.9117	2.80816	2.97871	3.60367	4.80821	0.884358	0.458502	0.0145069	0.214037	0.270052	4.61408	3.46669	4.12535	5.27576	4.96374	4.91134
CGGA_D20	2367	1	9.27715	2.40184	5.01521	4.7751	4.15736	0.00142661	1.60746	0.162246	0.0233367	0.473553	-0.0125318	4.23111	5.13265	6.68574	2.34194	0.509641	5.22045	3.25285	3.58542	2.92113	2.69549	3.63158	6.91254	7.94471	4.01287	2.13438	4.1567	1.39503	3.84902	7.4445	1.41385	5.33784	3.16098	3.2931	3.84955	4.71509	0.114847	0.496653	-0.000553072	-0.00547709	0.511332	4.44522	2.52934	4.34811	3.94341	3.69668	4.17281
CGGA_P279	1334	0	12.1941	2.41668	6.14731	4.66952	3.67298	0.151707	1.22199	1.36804	0.0248644	1.10876	0.0537937	4.28144	5.84949	7.02064	1.94581	0.159155	5.76006	4.4777	2.79038	3.80835	2.77817	2.49081	7.11491	7.95369	3.08928	1.60898	5.05556	3.51866	0.943075	4.19831	1.52612	6.45958	3.66339	2.83976	2.95058	5.28791	0.415282	0.677139	0.19316	0.131526	0.134515	4.59122	3.3093	3.81289	5.42028	4.77302	5.07351
CGGA_277	4739	0	11.7409	1.47988	5.09469	5.70281	4.82121	0.178358	1.20838	1.43487	0.166214	1.44717	0.454779	3.99261	4.93797	8.38602	0.786814	0.953276	5.60405	2.60343	3.42893	2.11437	2.14879	2.4546	9.45287	9.35805	2.84335	2.89258	3.36002	0.906986	4.39955	7.94726	1.68483	7.78887	2.76245	3.64889	3.68908	4.0337	0.713406	0.799352	0.336608	0.169044	1.25271	5.51712	2.75417	4.07194	5.85842	5.49991	5.59183
CGGA_675	4210	0	9.88008	2.96422	5.94576	4.96762	3.45868	0.0670851	2.61296	0.689261	0.183365	0.730703	0.0717229	3.70529	5.03041	6.98102	3.16117	-0.00289617	3.99878	4.41989	3.2987	3.61889	2.51027	3.12093	5.33003	7.59193	3.76556	0.931295	5.18331	1.30497	1.53173	4.08858	2.00033	6.03028	2.81901	2.73933	3.95825	5.91678	0.622296	0.225815	0.042453	0.796985	0.196317	4.07759	4.13566	4.08882	4.5345	3.74839	4.41713
CGGA_D52	3529	0	10.2044	2.74828	5.51589	4.43073	2.35256	0.0579729	1.38738	0.752789	0.527109	0.675012	-0.0417113	4.23783	4.88949	6.27439	2.37876	0.0520024	3.8955	3.94928	4.09402	3.54605	2.22384	3.15016	7.01922	6.47766	3.14688	3.12085	4.78	0.938152	2.51763	6.0675	1.26727	5.29129	2.1769	2.64174	3.57833	5.08856	0.372725	0.8858	0.093942	0.113313	0.573207	4.01166	3.47894	4.31817	3.79012	3.8451	5.49474
CGGA_P306	922	1	10.7916	2.75731	6.00464	4.92851	2.5593	0.0339544	1.63824	1.64361	0.0888399	0.84614	0.0398427	5.15678	5.93787	6.72395	2.32907	0.295904	5.53127	4.61691	3.14825	4.45656	3.0808	2.83172	7.59459	7.77641	3.38921	2.28539	4.82174	1.15904	1.90924	5.15911	2.52521	6.15158	3.70155	3.14413	3.211	5.33779	0.365964	0.813319	-0.00268873	0.131526	0.316277	4.63608	3.64605	4.17093	5.59737	4.52959	5.09246
CGGA_1377	2780	0	10.9808	3.4138	6.35766	5.35015	3.64697	0.0540532	4.57456	0.249316	0.113581	1.42661	0.186228	3.8845	6.4086	6.46336	3.41342	0.222934	6.57395	5.43306	3.4326	4.35229	4.3248	3.19218	5.84238	5.16613	3.96264	0.765641	3.63631	2.56459	1.25152	3.41343	3.70415	5.75488	4.14909	3.32387	3.82351	5.82495	0.249019	0.268133	0.081628	0.131526	0.0409434	4.28658	3.82104	4.46739	5.4194	4.50908	5.55601
CGGA_106	5028	0	10.7424	2.24536	5.19922	5.68448	5.00664	0.0540532	4.69531	2.09802	0.149839	1.11583	0.0948405	5.27666	5.92509	6.3288	1.76063	0.409836	6.39892	3.0738	2.96193	3.89223	3.04419	2.25753	7.02878	10.0776	3.44352	2.40344	2.96141	3.77363	2.19334	5.44381	5.75973	6.03002	6.25084	2.9769	3.89854	5.52642	0.532228	0.221988	0.081628	3.77868	0.121522	4.66437	3.0245	3.68214	5.93867	4.49895	5.37762
CGGA_1458	127	1	10.8789	3.59591	6.3657	4.7897	2.52299	0.0540532	1.34545	1.03198	1.49565	1.86942	0.0537937	4.46528	5.84729	6.62701	2.54716	0.0786793	5.6394	6.55728	3.68855	4.17885	3.41832	3.01426	5.76888	5.37456	4.04601	3.64004	5.29011	1.50162	1.82128	3.77473	2.15372	5.91169	2.5415	3.21642	2.72562	5.61333	0.327937	2.33654	0.0315332	0.425437	0.718987	4.45751	3.45796	5.33664	5.29155	4.80175	5.36524
CGGA_1263	772	1	10.3747	1.1484	2.48297	4.23737	5.71629	0.0301116	2.23772	0.437708	0.00472327	0.856936	0.00184609	3.00065	3.95216	5.15516	0.658203	0.205164	7.348	3.15604	2.54361	4.64023	1.41558	2.49423	8.13543	5.51005	1.74483	1.07563	2.04814	2.6658	2.69037	4.66117	4.04908	6.15122	3.51981	2.19684	2.84264	3.78557	0.74012	0.373282	0.052946	3.05228	0.898993	4.51319	2.16485	2.94143	2.64456	3.30858	2.83994
CGGA_591	1654	1	11.192	2.9701	4.84936	5.67294	4.20876	0.0206438	3.61887	0.251521	-0.0910861	1.24149	0.214795	4.31154	5.31998	6.67411	2.44627	0.0248145	6.23153	2.1275	2.90542	4.38403	2.94959	2.30724	5.60996	7.49161	2.16501	0.501763	2.36105	3.0187	0.904848	2.95819	2.87305	5.82792	3.98048	2.97712	4.03902	5.71719	0.0230745	0.931914	0.0318586	1.59791	0.14349	2.80966	3.98136	2.83254	4.74028	3.11418	3.78377
CGGA_P492	938	0	10.2108	3.26064	5.99994	5.41987	2.7158	-0.00684111	3.0671	0.879049	0.0508303	0.495638	0.0398427	4.80657	5.54372	6.57819	3.52679	0.0786793	5.2049	5.83051	3.35144	4.19378	3.47135	3.27423	6.28941	6.4733	3.25172	1.69844	5.32893	2.23209	1.09959	4.1551	1.49037	6.24129	5.31208	3.05566	4.08114	6.10887	0.00125961	0.836009	0.0315332	0.756008	0.349977	4.14009	3.77806	3.93489	5.81407	4.26809	5.45977
CGGA_P31	1883	0	10.6141	2.23145	5.07653	4.84549	4.51669	-0.00684111	2.75376	1.64808	0.0888399	0.70453	0.0948405	4.7655	5.09383	6.21272	1.78141	0.307713	5.94722	3.17505	2.96391	3.35503	2.79012	2.47669	6.95634	5.80484	4.48014	2.77312	3.93051	2.56201	2.44039	5.7861	4.42954	5.48445	4.29485	2.87741	3.4177	4.63021	0.439375	0.186331	0.0483933	0.187044	0.382891	4.24923	3.45921	4.29197	5.0309	4.3364	5.1307
CGGA_666	2499	1	10.1328	2.56884	6.19421	4.72989	3.91066	0.137057	2.44868	0.288224	-0.0330414	1.13106	-0.0417113	4.55475	4.57021	7.41247	2.61898	0.0918458	4.2738	4.19369	3.54189	3.42175	1.99029	2.8882	6.24596	7.41244	3.66551	2.02755	4.49165	1.53165	2.51112	5.88924	2.77904	6.25519	3.31205	2.77364	4.1275	5.54151	0.363756	0.644213	0.0318586	0.190715	0.196317	4.40181	3.46719	4.61533	4.63931	4.10668	4.79953
CGGA_1671	2168	0	11.9175	3.27773	5.59043	5.5261	3.55597	0.0540532	3.35623	1.96578	0.263931	1.19812	0.0676086	4.55474	6.72643	6.72882	2.44265	0.295904	6.42173	6.26346	2.84579	4.69479	3.81787	2.46529	6.41657	5.8366	3.1801	2.6606	2.60876	3.16009	0.978662	4.62143	3.75637	6.46029	6.48123	3.39596	3.6725	5.31604	0.474838	0.458502	-0.00268873	0.390271	0.17279	4.40111	3.58642	3.99612	5.11718	4.83609	5.2875
CGGA_1669	139	1	10.1912	3.3686	6.04598	4.95743	3.52746	0.0739577	3.63805	0.750245	0.0248644	1.16438	0.0676086	4.444	6.54928	6.10726	2.6677	0.17214	6.60934	5.61639	2.94194	4.6892	3.89601	2.98015	6.01638	4.60129	5.67987	2.25159	3.43447	3.688	1.59084	4.15191	4.12093	5.79826	3.82352	3.11694	3.52878	5.23348	0.875315	0.290637	0.162022	0.292164	0.22226	3.96913	3.90636	5.17534	5.17535	5.13249	5.25891
CGGA_634	2633	1	9.96509	3.29155	6.06666	5.47726	3.41648	0.132543	2.37626	0.375817	0.149839	1.4938	0.134731	4.54926	5.65133	6.75416	3.28929	0.775276	5.96168	3.80805	3.8652	3.3952	3.16715	3.01426	6.23498	8.2246	4.11739	2.58425	4.80738	1.78982	3.56604	6.43895	2.11862	5.32368	2.80816	3.27343	4.0835	5.9018	0.262449	1.05082	0.0650905	1.08611	0.612541	4.30632	3.73557	4.73505	5.31744	4.46023	5.37989
CGGA_1291	2422	0	12.2781	1.94239	4.19756	3.2712	4.99077	-0.00684111	1.49938	2.80742	0.338272	1.89475	0.471529	3.5082	4.97685	5.49206	1.74484	0.0224062	3.76425	3.06306	2.38736	4.76962	2.08246	1.18013	8.86488	8.12529	1.80223	3.04211	1.92258	1.87259	2.37893	4.23187	0.302571	7.27271	1.50531	2.86367	4.0517	3.29722	0.302067	0.608058	0.396707	2.00243	0.0951706	4.24424	2.73623	4.27705	3.05421	5.26064	3.77805
CGGA_757	1047	1	9.85643	3.05839	5.64245	6.40905	3.07515	0.0301116	2.57567	0.251521	0.00472327	0.912418	-0.0125318	4.31803	5.36604	6.39587	2.99533	0.117809	6.50718	3.93575	2.88479	3.56971	3.51439	2.5089	5.79609	8.31431	3.49432	1.35269	3.88849	2.59054	1.21595	4.12879	2.70119	5.7869	3.72202	2.87373	3.98076	5.82435	0.230687	0.154098	-0.000553072	0.636185	0.00269431	4.24343	3.68539	3.67213	6.11385	4.02132	4.79422
CGGA_1862	110	1	10.1426	3.64202	6.34289	5.93522	3.95991	0.0936718	2.7916	0.946637	0.0508303	0.240118	0.0257529	4.7269	6.53119	5.93718	3.94796	0.0366828	6.9453	5.82795	2.84361	4.36016	4.36551	3.58272	6.55604	4.92511	5.71511	0.472571	1.92258	1.66795	1.03374	3.67933	3.59529	5.90481	3.13088	3.62565	4.19071	4.93499	0.00125961	0.0734439	0.0483933	0.448423	0.0818081	3.92544	3.98298	4.17093	5.87917	3.95683	5.26105
CGGA_1195	476	1	11.2768	1.66447	5.00195	5.16254	6.56087	0.0136576	1.74811	0.541634	0.0379116	0.495638	0.0948405	4.85245	5.03117	5.84128	1.58739	0.235356	6.46226	3.88067	2.61097	4.46986	2.63883	2.30704	7.82068	8.26653	2.49633	1.00706	2.21936	1.7672	1.69024	4.74443	2.82127	7.01645	3.64054	2.70401	3.64561	4.16186	0.682631	0.290637	0.0483933	0.317311	0.487363	4.86504	2.9311	4.02378	4.91917	4.74153	4.803
CGGA_P439	1022	0	11.5191	3.14445	6.05093	5.83823	1.99816	-0.00684111	5.17026	0.284959	0.0379116	0.474132	0.0257529	5.99123	7.06762	7.08378	4.15754	0.0224062	6.47661	5.6572	3.13617	5.4559	4.43662	3.12873	5.91279	5.96251	4.74272	1.55761	4.07158	4.64377	0.861349	4.12929	3.40346	6.03439	5.4211	2.88326	4.45843	5.91896	0.194125	0.137301	0.0315332	0.0884677	0.0409434	3.92544	3.89932	2.6925	5.82936	3.65086	5.17621
CGGA_1058	995	1	10.7679	3.26844	5.61214	6.26192	4.37183	-0.00684111	4.40629	0.319722	0.101269	1.31364	0.108262	4.30691	5.63046	6.76552	2.70639	0.132828	7.4829	3.49728	3.56874	3.86867	4.14698	3.11497	6.0178	8.42553	4.22586	0.51979	4.13622	3.33768	0.698905	4.16703	4.14241	5.71623	4.96915	3.55552	3.35585	6.14891	0.403096	0.0470452	0.0315332	2.72424	0.0683177	3.76873	3.53211	3.1661	6.12203	4.06956	5.12235
CGGA_254	4793	0	9.22675	2.62645	4.87849	6.72633	3.82457	0.00142661	2.46384	0.359058	0.54139	0.65866	-0.0125318	4.22325	3.93081	6.20658	2.94759	-0.00289617	3.9643	3.63637	2.86966	3.19413	2.50422	2.48439	6.49547	10.8892	2.97407	0.333518	5.45558	2.45877	0.478475	4.5556	2.56634	5.94845	3.26701	2.74729	3.60773	5.25122	0.250613	-0.0157711	-0.000553072	0.101889	0.0173814	3.47857	3.7212	3.14806	5.91007	4.2099	4.35559
CGGA_904	774	1	12.1429	4.45047	6.51173	4.16395	2.62713	0.00142661	3.39304	1.05759	0.439167	1.39631	-0.0125318	3.15998	6.2785	6.53625	3.22241	0.0110258	5.64228	5.44507	2.6852	4.9271	3.64035	2.48931	4.53964	6.24239	2.87814	2.65971	2.83037	1.55261	1.8318	3.22623	1.71715	6.54161	3.23144	1.87417	3.59239	5.10073	0.158259	0.411285	-0.000553072	-0.017945	0.14349	4.25173	3.54454	4.08742	4.11895	5.23361	4.17281
CGGA_1390	2050	0	10.595	2.56774	5.07742	4.82801	4.378	0.208152	1.98344	1.35164	0.398801	0.732124	0.0398427	5.39225	5.67967	6.60533	1.86619	0.307713	6.1271	3.43595	3.82605	2.52595	2.86635	2.73787	7.3683	6.69475	3.71005	3.7398	4.11657	1.90188	3.57652	6.41733	4.88031	5.51031	4.37849	2.94953	3.7072	4.5857	0.630546	0.677139	0.603299	0.640572	1.07232	4.52692	3.41335	4.03211	4.79281	4.35306	4.66524
CGGA_1525	1686	1	12.3285	2.82942	4.12332	2.7593	6.12202	-0.00684111	2.78357	1.48282	0.208125	1.25057	0.734857	4.39847	5.89326	5.85099	1.27884	0.0224062	4.44782	3.01368	2.36555	4.52289	2.19282	1.20321	8.90161	8.3538	2.77136	2.50778	1.93591	2.27707	1.94082	4.54793	0.979639	7.02237	3.07787	2.60874	4.22014	3.91316	0.00125961	0.553866	0.268637	0.200602	0.809969	4.52989	2.30713	3.82269	3.66191	5.23308	3.70328
CGGA_1081	216	1	13.1143	2.25938	5.60338	4.61419	4.26581	0.0487744	2.43027	1.46844	0.0781413	0.978654	0.0580076	5.1166	6.98624	6.52945	1.1571	0.649646	7.16188	4.70883	2.23553	3.34878	3.29573	2.54756	5.98245	4.30892	4.58293	2.28454	4.39731	3.43497	2.46815	4.34869	2.9509	4.00798	2.90396	2.97471	2.95978	3.76396	0.363756	0.0164621	0.162191	-0.108562	0.170135	4.17634	-0.21579	3.71102	2.60722	3.67531	3.49418
CGGA_235	2340	1	10.976	2.46865	6.28188	5.45064	2.94109	0.00142661	1.84556	0.288224	0.00472327	0.784146	0.00184609	3.86729	4.88605	7.58415	3.21539	0.418606	4.55706	4.12215	3.44339	2.78753	2.14879	2.23931	6.48283	7.94635	2.94702	1.24747	4.3149	0.862281	2.87073	6.08351	0.925549	5.73974	2.97238	2.67471	3.48101	5.29645	0.081239	0.32119	0.103956	0.22259	0.222051	3.70353	3.2883	3.9499	5.13157	3.76351	4.55517
CGGA_760	4110	0	9.81714	2.18604	6.10238	4.33451	3.00305	0.0206438	2.13962	0.213904	0.0600425	0.891884	-0.0125318	4.46439	4.27029	6.14171	2.08309	0.143312	3.84848	4.00608	2.501	2.46522	1.84949	2.21712	6.11532	8.31674	2.86462	1.39577	4.98002	2.27864	1.67778	5.43173	2.88746	5.22425	3.3577	2.26882	3.25117	5.34559	0.317886	0.307903	0.042453	1.10988	0.209239	4.19534	3.44945	3.69251	4.56636	4.28311	3.28322
CGGA_1010	246	1	7.06754	2.34193	4.74871	3.23953	1.41554	0.189508	2.11397	0.386773	0.0379116	0.598757	0.121558	2.02248	3.76907	3.35642	1.48811	0.0224062	2.37955	4.20874	1.75009	2.14493	1.67461	1.02348	3.37725	1.79789	2.83284	0.635466	4.03512	1.45673	1.06706	1.59753	1.15034	3.87249	1.53472	0.999185	2.59259	3.39533	0.00125961	0.174237	0.396707	0.17336	0.013027	1.66812	1.59302	2.432	2.77547	2.82963	3.24827
CGGA_1454	2655	0	10.1273	2.47868	5.77846	4.94144	3.55402	0.0136576	1.28506	0.626982	0.101269	0.647765	0.0398427	4.75992	5.55416	6.88134	2.19345	0.687762	5.83874	1.89386	3.63536	2.45251	2.67315	3.01239	7.40576	7.4833	3.89419	3.68898	4.06865	0.843262	4.20134	7.35303	2.97791	5.65875	2.13569	3.34296	3.78094	4.79173	0.262449	0.951066	0.4771	0.436975	0.584625	4.84451	2.98505	4.59816	5.39017	4.82081	5.32529
CGGA_1361	2804	0	10.3715	3.79198	5.90274	5.9123	3.53341	0.0739577	3.32178	0.136631	0.113581	0.676417	0.0537937	4.14886	6.10992	6.53092	2.97222	0.185008	6.41707	4.36851	3.86024	3.33947	3.80817	3.39663	6.07205	6.86482	3.53226	2.10741	4.13436	2.26117	2.43316	5.41376	3.11656	5.51006	4.04647	3.06243	3.8895	5.83514	0.403096	0.387572	0.326732	0.828222	0.0951706	3.83226	3.51068	3.91438	5.46424	3.81483	5.0656
CGGA_1101	214	1	7.72861	1.69674	4.08984	2.7114	3.76876	-0.00684111	1.52566	1.48282	0.149839	2.63292	0.664482	3.67527	4.04662	2.16786	1.37366	0.0224062	2.60755	4.7714	1.23659	2.81664	1.55034	0.913735	3.85952	2.89722	2.72961	2.1449	3.38944	3.09137	2.01833	1.5334	1.76115	3.8415	1.19491	1.12172	3.38779	3.16764	0.262449	1.16759	-0.00268873	0.159547	0.63085	2.42506	1.70831	4.06713	2.99184	2.85042	4.13304
CGGA_P128	1586	0	9.67876	3.26064	5.89602	5.50339	2.9598	-0.00684111	3.6928	0.471479	0.263931	1.28244	0.0676086	4.5271	5.36333	6.13729	3.51862	0.47409	5.5224	4.35958	3.84225	3.53481	3.34765	3.31485	6.14239	9.07438	4.28305	2.42912	5.5363	1.70182	3.09561	5.92669	3.23517	5.34725	2.91725	3.00547	3.99921	5.67592	0.288971	0.377134	0.0980086	0.292164	0.293354	4.24112	3.6759	4.51663	5.31968	3.97004	5.28121
CGGA_1013	1725	1	12.2646	1.86019	5.53908	5.37013	5.07986	0.00142661	3.50168	0.839148	0.217223	1.20932	0.0160864	3.20078	5.55471	6.29216	2.22487	-0.016954	6.74704	4.04383	2.63269	3.74431	2.68623	2.12601	6.59298	6.55988	3.0214	0.538231	2.50524	3.2343	1.32577	3.20096	3.0865	6.13774	3.76613	2.39448	3.4539	5.09465	0.081239	0.294506	0.208465	0.453884	0.771699	3.99387	3.64724	4.27502	4.75434	4.71286	4.2889
CGGA_J024	3410	0	10.2725	2.11881	4.52302	5.76307	5.9229	0.00142661	3.84652	0.0950856	-0.0140683	0.650408	0.202342	3.66975	5.35145	5.33055	0.884927	0.252801	7.19595	3.56673	2.57008	3.99348	2.83152	2.70459	6.16702	6.2988	3.21296	0.476987	1.72508	2.45877	0.605977	3.86284	3.13718	5.7869	4.99954	2.97471	4.19495	5.6478	0.0583061	0.154098	0.252864	0.539776	0.0319266	4.25794	4.10829	3.11944	4.83764	3.73127	4.42205
CGGA_1469	2626	0	7.2562	1.8749	3.67621	3.93248	1.49969	-0.00684111	0.856132	0.636154	0.063623	0.3617	0.0537937	2.2404	3.04205	2.64755	1.30875	0.185008	2.70603	3.30728	1.48186	1.69845	1.09305	0.740289	2.46047	4.61467	2.37905	0.884543	4.00178	0.50369	1.09959	2.73186	0.512006	3.75627	0.855999	1.74811	3.2754	3.39711	0.122708	0.162035	0.0315332	0.240543	0.0270543	2.01373	1.43542	2.19908	2.11806	2.06159	2.75831
CGGA_1471	2623	0	10.7559	2.748	5.30921	5.19938	4.90015	-0.00684111	4.56236	1.03198	0.063623	1.10166	0.0948405	4.46704	6.03015	6.55548	2.37242	0.185008	7.22687	4.41695	2.74897	4.0685	3.45011	2.56447	6.47886	7.62188	3.46115	0.609623	3.85997	3.94777	0.774409	4.09042	5.21798	5.87978	4.9996	2.95872	3.63579	5.44201	0.520916	0.0864553	0.208522	1.635	0.121522	4.60991	3.71939	3.88086	5.58996	4.11377	5.06643
CGGA_799	1868	1	11.2415	3.24648	6.19444	5.08913	3.21777	0.385857	2.08354	0.95395	0.0508303	1.26977	0.121558	5.02902	5.1185	6.9763	2.63054	0.159155	5.55783	4.63165	3.50376	3.7493	2.94678	2.84884	6.31766	6.28872	3.64399	2.30578	5.15058	1.63824	2.58399	5.89536	3.1823	5.81199	3.24573	3.14255	2.93963	5.51943	0.288971	1.22527	0.19316	0.342035	0.701794	4.54123	3.56934	5.05703	5.34154	4.2515	5.56551
CGGA_P483	299	1	9.91752	3.76378	5.98161	5.54727	4.78068	-0.00684111	5.40262	1.81191	0.0248644	0.175405	0.0398427	4.88665	6.05217	6.27959	3.04874	0.159155	6.14963	5.71215	3.31719	4.04875	4.27978	3.36568	6.65473	8.88174	3.42265	1.35596	4.65382	3.22717	0.806669	4.66103	3.41085	5.88982	5.32353	3.06074	4.63192	6.31405	0.032509	0.478112	0.55392	0.317311	0.0270543	4.14144	3.84153	3.44729	6.14099	4.42029	5.23184
CGGA_P319	508	1	9.94345	4.46903	6.27653	5.15558	2.79537	0.0136576	3.40726	2.85359	0.689422	1.38008	0.08129	4.86795	6.45995	6.33283	3.52407	0.0648166	6.66845	4.57109	3.06669	3.74303	4.93857	3.65296	6.22383	4.37496	4.51839	3.31148	5.79053	4.46021	0.698905	3.7758	3.03609	6.05372	4.92196	3.47763	3.72576	5.94786	0.390816	0.137301	0.081628	0.0884677	0.121522	4.30751	4.10116	4.17702	6.19273	4.46598	5.53735
CGGA_1212	2292	1	10.8067	3.67978	6.19039	6.19259	3.79244	0.0339544	3.93992	0.521944	0.173465	0.879541	0.08129	4.07465	6.03942	6.51571	3.53491	0.365343	6.73379	4.07178	4.07897	3.98593	3.97351	3.15415	5.68041	8.04762	3.91215	0.818931	2.9931	2.71785	1.24576	4.19599	3.16764	5.69634	3.5176	3.24451	3.53233	5.99231	0.22181	0.279431	0.081628	2.1673	0.258255	4.0543	3.54035	4.64558	5.5724	4.67785	5.45461
CGGA_655	4231	0	9.8547	2.99927	5.1765	5.30383	2.13595	0.0761125	2.95597	1.53873	0.555569	0.753871	-0.0125318	3.88692	4.56736	6.37307	3.17989	0.229179	5.00922	4.26396	3.60284	3.49641	3.07234	2.98822	6.03318	8.80639	2.86612	1.2934	4.45251	2.09866	1.34558	4.02275	1.72628	6.25342	3.17353	3.4568	3.44782	6.12539	0.381629	0.239787	0.052946	2.1992	0.116365	4.3759	2.84587	3.23378	5.91967	4.16204	4.85919
CGGA_2002	572	1	10.6768	2.86188	5.65223	6.1717	2.93171	-0.00684111	3.14821	0.450776	0.208125	2.06847	0.108262	4.83982	5.81597	6.58394	3.02705	0.106009	6.68427	5.04834	3.06669	3.55911	3.86013	2.84458	6.40591	9.03803	2.93954	2.0868	3.90557	2.72932	1.45915	5.11514	3.24634	5.97191	4.84404	3.009	3.91911	5.80085	0.0631516	0.245254	0.0145069	0.292164	0.270052	3.95658	3.5462	3.856	6.12286	3.96384	5.01702
CGGA_1526	2502	0	10.3498	3.46282	5.81764	5.68295	3.11111	-0.00684111	3.85426	0.471479	0.101269	0.506275	0.0398427	4.28954	5.59005	6.52792	3.82854	0.197762	6.26913	5.50685	3.75051	4.13147	3.77085	3.49045	5.54698	8.58313	3.29691	1.40557	6.09899	3.10538	1.29119	4.55088	2.18485	5.69237	4.63879	3.56236	4.29002	6.34524	0.451285	0.19832	0.0145069	0.756008	0.477258	3.75488	3.7887	3.41607	5.82089	3.58028	5.21122
CGGA_898	1663	1	11.0128	2.2162	5.0455	6.58697	3.07515	0.00142661	2.65598	0.632597	-0.0330414	0.761505	-0.0565184	4.02596	5.08751	5.6302	2.46485	0.0918458	5.37702	3.2485	2.97514	3.22902	2.90817	2.6136	6.43786	8.45316	2.90191	1.51198	4.61235	2.64732	2.24646	5.54728	2.28219	4.81832	3.14715	2.43095	3.67712	5.06228	0.14755	0.508491	-0.000553072	0.539776	0.603216	3.06548	3.22651	3.89995	3.94341	3.48703	4.1485
CGGA_1205	929	1	6.13369	1.77401	4.37732	2.18297	1.93136	-0.00684111	3.07804	1.08614	0.063623	1.55809	0.134731	3.57814	3.51083	2.9397	1.01119	0.0224062	3.10967	2.77383	1.33755	2.88681	1.49319	1.29871	3.22097	3.58373	2.75921	0.833784	4.05199	1.12327	1.85124	1.35431	2.75067	3.29939	2.41109	1.16007	3.59015	3.85748	0.180097	0.00647017	0.776837	0.131526	0.013027	2.1336	1.68812	3.22378	2.58895	2.39226	3.20358
CGGA_1126	784	1	12.9092	3.34977	5.50377	5.17748	4.24271	0.0739577	2.8491	0.284959	0.0762921	0.82059	0.134731	4.3691	5.89514	6.24066	1.89484	0.0508186	6.38216	5.37176	2.69406	5.83446	3.36759	2.95298	6.76933	6.24586	3.20498	1.69055	3.47365	2.32371	1.64791	4.32205	4.19328	6.99664	4.2914	3.25616	3.40867	4.65421	0.249019	0.149724	0.0483933	0.227349	0.415053	4.59826	3.88868	4.3734	5.17751	5.51415	4.823
CGGA_1159	3181	0	10.4094	2.1924	5.222	4.89844	4.40445	0.0339544	2.22158	1.03198	0.219478	1.26977	0.0398427	4.46176	5.01037	6.28848	1.78655	0.431575	5.76821	2.50132	3.09743	2.57782	2.54452	2.46815	7.40412	7.40488	3.25342	4.01867	3.30324	1.9467	3.78078	6.08336	3.87863	5.48392	3.57826	2.89871	3.23919	4.47585	0.208028	0.790248	0.297928	0.253619	0.744388	4.50236	3.15518	4.60109	5.09474	4.52212	4.78371
CGGA_P422	1091	0	10.5902	2.69313	6.02915	5.8217	2.76341	-0.00684111	3.58568	0.18783	0.0762921	0.214568	0.0257529	4.74493	5.3697	6.8561	3.08349	0.210403	5.71454	5.63238	3.34111	3.97458	3.11641	3.25109	6.05902	5.92899	3.04645	1.52674	5.94301	1.7349	1.50288	4.5632	1.66479	6.13775	4.55785	2.97329	3.80142	6.33476	0.0631516	0.497446	0.0315332	0.0738302	0.185321	4.01132	4.03079	3.71633	5.40726	3.46584	5.28855
CGGA_P27	413	0	10.4948	3.70987	6.63619	5.93834	3.59616	-0.00684111	3.79765	0.284959	0.113581	1.65946	0.121558	4.16602	6.25976	6.69035	3.1321	0.331044	6.60672	4.11872	4.22402	3.80036	3.99522	3.57427	5.60882	5.31742	4.25394	1.74489	3.99461	1.78082	2.3303	5.10439	3.29411	5.48157	3.67269	3.19227	3.7956	5.9013	0.137252	0.616886	0.130311	0.117313	0.372005	4.3512	4.02442	4.63756	5.37926	4.26136	5.44113
CGGA_P83	1698	0	11.253	2.85974	5.88294	5.52147	4.19208	-0.00684111	4.73992	0.110316	0.063623	1.40933	0.0948405	4.3672	6.34588	6.76234	2.10397	0.0786793	6.82775	4.50522	3.04454	3.64079	3.45011	2.58811	6.89443	6.10297	2.90708	0.811443	2.9224	3.133	0.494549	3.96819	4.10422	6.27812	5.48519	3.18156	3.57192	5.61611	0.619919	1.01837	0.130311	0.413808	0.185321	4.66214	3.67695	4.20243	5.69812	4.63293	5.21011
CGGA_D19	297	1	9.78405	3.43991	6.13601	5.10497	2.68942	-0.00684111	2.46627	1.85102	0.137864	0.537743	0.0676086	4.19966	5.5781	6.98992	4.33008	0.50517	5.86757	4.9916	4.14598	4.25256	3.95336	4.0254	5.70845	5.71108	4.71209	3.61392	5.96605	1.88102	2.04429	5.25491	1.69176	5.4721	3.54246	3.83301	2.96145	6.32524	0.651587	1.47742	0.55392	0.599989	0.134515	4.44272	3.89046	4.21495	5.95553	4.23093	5.80413
CGGA_P594	84	1	10.1301	3.24014	5.88598	5.28753	3.68711	-0.00684111	5.2985	2.05864	0.0762921	0.201628	0.0257529	5.06768	6.66892	5.96326	3.25131	0.0224062	6.91016	6.46099	2.86303	4.49782	4.42995	3.07455	6.33741	6.56259	5.64754	0.529042	2.11427	3.84919	0.453862	3.85459	4.91301	6.2795	4.95286	3.42673	4.59154	5.30976	0.22181	0.0734439	0.0483933	0.102961	0.0270543	3.88934	3.90811	3.51773	5.95134	4.54831	5.35174
CGGA_P437	1023	0	11.0931	3.67073	6.76542	5.30038	1.75531	-0.00684111	1.53216	2.08828	0.063623	0.70453	0.0398427	4.74634	6.16061	7.46793	3.73933	0.17214	6.1747	6.06441	4.27693	4.37963	3.88382	3.80639	6.25751	5.94924	5.30496	0.69394	5.1027	1.22793	0.690252	4.74341	0.711679	6.02021	3.31356	3.31144	3.78094	6.66454	0.235473	1.42471	-0.00268873	0.253619	0.147389	4.12711	3.67695	3.06493	5.88765	4.21829	5.51465
CGGA_1536	840	1	10.7092	3.8525	5.92656	6.28815	3.97052	-0.00684111	5.78465	0.491883	0.838587	1.14376	0.108262	4.34291	5.7971	6.31017	3.77125	0.247672	6.60131	4.1909	3.72762	3.73147	4.03305	3.40218	4.7851	6.63367	3.70273	1.86158	4.139	4.16007	1.50288	4.14709	4.69656	5.20222	4.38335	3.21343	4.54545	6.51659	0.235473	0.377134	0.297928	2.77201	0.121522	4.04772	3.64605	4.30733	5.30812	3.87289	5.51986
CGGA_1231	2279	1	10.3329	1.25466	2.40085	4.0641	6.35453	1.11491	3.84414	2.83389	0.856256	1.83723	1.67437	4.57704	4.56907	3.22578	0.174425	0.658513	6.27482	3.83277	1.98995	2.79577	2.15118	1.08232	7.14563	8.17274	1.94339	2.74522	1.70648	2.38968	3.16196	3.67037	5.23891	6.02264	5.28689	1.92668	3.76675	3.78557	0.912283	1.18413	0.60047	1.47773	1.52289	5.48516	0.972944	2.68802	3.71609	4.33026	3.76376
CGGA_638	2386	0	10.1863	2.3943	6.16451	4.05561	2.8049	0.0939191	3.83819	1.11461	0.113846	0.633749	-0.02705	4.55475	4.6621	5.65655	1.8951	0.449595	3.83714	4.8615	2.85824	3.98678	2.48391	2.54036	5.09894	8.10222	2.65752	1.43774	4.94643	2.94707	1.08308	4.37238	3.89173	5.67904	4.98248	2.2494	3.55701	5.38218	0.450607	0.876418	0.093942	1.1208	0.116365	4.35182	3.11858	3.80119	4.6989	3.87233	4.4844
CGGA_1413	2720	0	9.49456	3.93083	6.11018	5.33142	2.94114	0.0339544	2.50922	0.654319	0.125779	1.21141	0.0398427	3.77262	5.39035	6.53845	3.75197	0.905062	5.76305	4.60084	4.18056	3.57824	3.6568	3.95255	5.31588	8.03129	4.67236	1.79717	5.92953	1.64323	3.1438	5.83628	1.83912	5.0551	3.25637	3.41911	3.9883	6.09558	0.137252	0.458502	0.0483933	0.253619	0.446498	3.83574	3.67062	3.88255	5.38169	3.62878	5.31749
CGGA_1389	1669	1	11.9803	2.05155	5.63291	4.59366	4.49764	0.24494	1.13041	0.561052	0.063623	1.34421	0.0398427	4.45587	5.22657	6.7833	1.93668	0.409836	5.32948	3.98187	2.90308	4.06195	2.60083	2.35159	7.74078	8.18841	2.57115	2.28024	3.59328	1.73956	2.72564	5.28613	2.18792	6.99958	2.56736	3.06074	3.37058	4.82967	0.554612	2.22394	0.130311	1.31815	0.3276	4.41966	3.22484	4.09837	5.05572	5.101	4.90279
CGGA_1071	3252	1	11.7723	2.86599	4.79783	5.10732	3.91066	0.00142661	3.34059	3.54344	0.0600425	0.213021	0.0160864	4.03575	5.42111	6.44763	1.90874	-0.00289617	6.61459	4.70512	2.49873	3.64436	4.19473	2.31258	6.4216	3.30162	5.34751	2.94797	4.17492	3.15727	0.304029	3.11387	3.25016	6.40512	6.75997	3.59901	3.87708	4.1044	0.230687	-0.0157711	-0.000553072	0.572674	-0.0121375	2.74667	3.92779	2.99384	5.46012	4.91459	4.72804
CGGA_1854	1626	0	11.1989	2.54605	5.61505	4.94007	4.55532	0.151707	3.71801	0.599104	0.063623	1.19143	0.0676086	4.11384	6.13882	6.64974	2.13186	0.106009	6.41207	4.23243	2.59528	5.02022	3.59959	3.78395	6.8983	8.3884	2.42031	1.11953	2.72208	3.80561	0.59125	3.78219	3.33243	6.36562	5.00382	2.9859	3.62259	5.18097	0.327937	0.418421	0.0145069	1.17225	0.210054	4.43953	3.0576	3.85427	5.52763	4.51912	5.01005
CGGA_P500	930	0	10.4358	3.61858	6.04907	5.59187	2.99933	-0.00684111	3.14405	0.707451	0.0508303	0.647765	0.0398427	4.37855	5.85822	6.90543	3.35438	0.247672	5.81001	6.28842	3.84828	4.14694	3.87973	3.63806	5.90849	6.72331	3.71733	1.34582	6.43374	1.67771	1.29119	4.31712	2.82509	6.12174	4.00917	3.50294	4.43138	6.40308	0.598449	0.894742	0.0315332	0.117313	0.0270543	4.04259	3.74857	3.83154	6.044	3.68424	5.21973
CGGA_1662	1493	0	12.0523	1.8749	5.5214	4.53598	4.00323	0.0739577	1.95968	1.11245	0.0379117	0.558359	0.0257529	4.20758	5.41817	6.37854	1.62856	0.17214	5.12225	4.32607	2.88004	3.79131	2.41446	2.28747	8.03153	6.61125	2.76408	2.94869	3.68832	2.1686	1.69441	4.98119	2.61734	6.82497	3.99758	2.83573	3.63141	4.72421	0.97205	0.643033	-0.00268873	0.756008	0.17279	4.60899	3.3093	3.95589	5.06559	4.78686	5.21493
CGGA_P103	1651	0	9.68768	4.04342	6.1778	5.24855	2.9782	0.0339544	3.29397	0.672253	0.274813	1.36822	0.223658	4.28144	5.50744	6.48664	3.26298	0.53559	5.65313	4.96584	4.24042	4.27229	3.69988	3.63344	5.57502	7.9447	4.17574	2.41517	5.89524	0.903953	2.64739	5.57293	1.98973	5.40402	2.80816	3.32387	3.89403	5.93133	0.415282	0.366615	0.19316	0.102961	0.446498	4.19975	3.88868	4.47008	5.3704	3.99528	5.52159
CGGA_852	169	1	10.1647	3.67187	5.32209	5.73874	3.92095	0.132543	4.56924	0.832117	0.42805	0.912212	0.108262	4.48391	5.92164	5.76656	2.67813	0.159155	6.89281	4.92831	3.43398	4.46443	4.16517	3.15917	5.77771	8.28677	4.66693	0.993969	4.45652	3.55068	1.09959	4.23036	3.99618	5.35191	4.72506	3.54748	3.73596	5.68503	0.672351	0.290637	0.0650905	1.66023	0.054697	4.0923	3.621	3.54442	5.54398	3.80078	5.6936
CGGA_J73	1134	1	10.2935	3.0223	6.14406	4.86469	2.45858	-0.00684111	2.07473	1.01113	0.418373	1.992	0.94206	4.53823	5.49822	6.59873	2.92578	0.307713	5.52865	5.00365	3.99227	4.27229	3.21598	3.184	6.78458	6.65036	4.00152	3.63908	4.22882	1.28069	3.03483	5.567	2.71805	5.70687	3.15383	3.07084	3.47684	5.42846	0.692845	0.356015	0.578785	0.200602	0.648923	4.51194	3.07128	5.59545	5.33145	4.4959	5.48914
CGGA_1667	2180	0	9.8262	3.57283	5.965	6.07319	3.31745	0.0339544	4.18271	0.599104	0.063623	1.55809	0.147782	3.82978	5.15317	6.49224	3.5669	0.235356	6.11547	4.47263	4.06886	3.53849	3.47975	3.44841	5.48285	9.46623	4.02588	1.60898	6.20147	2.03975	1.93386	4.80644	2.9435	5.25677	3.48176	3.25471	3.80818	6.14443	0.630546	0.448591	0.081628	0.589665	0.134515	3.75766	3.77319	3.71922	5.72598	3.57078	5.17392
CGGA_908	2436	1	11.8064	3.88869	6.1853	5.27456	3.80777	0.00142661	4.01865	0.752789	0.0960748	0.905609	-0.0125318	3.55819	6.11856	6.80989	3.01723	0.0110258	6.15683	4.66637	2.48279	5.14967	3.63083	2.62749	5.42109	8.46139	2.86159	0.426272	3.68463	3.05252	1.01246	2.78043	2.98972	5.80885	3.37556	2.69644	3.42482	5.62551	0.158259	0.958968	-0.000553072	1.632	0.116365	3.48888	3.42562	3.63947	4.25265	4.29994	3.87534
CGGA_812	4035	0	10.1836	2.2162	5.66293	4.5763	4.62651	0.0579729	4.03544	0.459447	-0.0715466	1.01057	-0.0417113	4.33095	4.35998	5.76987	1.39638	0.36543	4.94032	4.33067	2.72016	3.70726	2.50422	2.54036	5.77884	8.2081	2.47314	0.902741	4.9002	3.42998	1.40364	5.03046	4.15158	5.08992	4.8006	2.86113	3.80927	5.50062	0.200174	0.0480693	0.171604	1.82687	0.209239	4.27033	2.89298	3.66359	5.09318	3.82311	4.81277
CGGA_1386	2770	0	12.4991	1.58007	5.41823	3.40926	5.65371	0.0339544	2.257	0.626982	0.063623	0.750241	0.0257529	4.53101	5.51219	6.14863	1.64009	0.0786793	3.32513	4.25645	2.03859	5.19953	2.28749	2.02594	7.89227	8.31855	3.60513	0.926605	1.81117	2.20237	0.22993	3.69421	0.748266	7.12789	3.34382	2.65145	3.93936	3.99458	0.194125	0.19832	0.0650905	0.200602	0.197742	4.08238	2.92539	3.1661	4.07791	5.4031	3.80044
CGGA_P30	404	1	10.5377	3.91028	6.28766	4.75607	5.36535	-0.00684111	3.66712	1.6074	0.137864	0.638091	0.0257529	4.90216	6.29003	5.95918	2.88208	0.0508186	6.3232	6.90718	3.60308	4.81154	4.34496	2.98972	5.82298	1.97158	4.14333	4.22745	3.30492	5.30037	0.943075	4.77009	3.16173	5.7815	5.32437	3.01076	3.67143	5.00448	0.651587	0.0201289	0.081628	0.131526	0.0270543	5.00569	2.80739	5.19948	5.38321	5.05765	5.59004
CGGA_1066	723	1	10.6247	3.29613	5.64997	5.48534	3.78433	-0.00684111	4.56389	0.645266	0.173465	2.36194	0.717589	4.93467	5.93104	6.36115	3.44125	0.222934	6.63013	4.92831	3.41453	3.94261	4.04751	3.48007	6.69218	8.9004	3.64015	1.40557	4.1556	3.51866	2.1524	4.72549	4.37159	5.51822	4.34395	3.30449	3.64995	5.6993	0.498045	0.0864553	0.0315332	0.579269	0.197742	4.23106	3.49497	3.88847	5.70514	3.81658	5.33137
CGGA_846	2991	0	11.1369	2.10282	5.11374	5.55829	4.64273	0.113199	3.01338	1.4266	0.063623	1.92788	0.108262	4.73689	5.17592	6.35409	1.59928	0.17214	5.72664	2.50132	2.97574	3.0168	2.80432	2.32951	7.43072	10.1116	2.49929	1.65444	2.64399	3.66486	2.60119	6.02385	4.63857	6.56096	4.98952	3.20289	3.5627	4.92436	0.194125	0.397933	0.326732	1.68995	0.382891	4.66437	2.70251	3.92509	5.86183	4.84772	5.06894
CGGA_503	4410	0	9.55222	3.27773	5.92338	5.04124	3.13694	0.0739577	3.48462	0.0282841	0.45666	1.11583	0.223658	4.67769	5.48215	6.0886	2.94709	0.45299	5.67637	4.10713	3.84627	3.79835	3.5384	3.43228	6.06691	8.19978	3.98371	3.12819	4.41901	2.50682	3.06708	6.1041	3.45911	5.18671	3.71577	2.91777	3.72371	5.45015	0.194125	1.14382	0.0315332	0.378359	0.565702	4.34374	3.54386	4.96816	5.07109	3.98081	5.23074
CGGA_1065	3412	0	10.5435	2.85331	6.09914	5.23153	3.13559	0.0540532	2.07914	0.733283	0.0508303	1.62476	0.0257529	4.5732	5.38687	6.803	2.59506	0.0224062	6.48456	4.94094	3.34259	3.83007	3.1201	3.05114	6.22636	6.07931	3.95655	2.21963	5.32614	1.05647	1.106	4.02148	2.33321	6.32563	2.50924	3.31422	3.18527	5.69437	0.692845	0.0734439	0.0650905	0.0738302	0.0270543	4.57175	3.55666	4.65261	5.94137	4.33756	5.45033
CGGA_698	1851	1	10.6818	3.75952	4.72877	5.12896	4.17878	0.0394878	4.24701	0.512465	0.299398	1.06615	-0.0125318	3.89213	5.89353	5.84689	4.00289	0.168372	6.37662	3.69546	3.36857	3.49497	3.56542	2.80046	3.95798	7.25	2.82954	1.45149	3.9088	3.72959	1.55505	3.9172	4.49608	5.61202	3.95711	3.36402	3.79189	5.5368	0.336442	0.838341	0.0633396	2.00307	0.234755	4.10362	3.62887	3.96183	4.53336	3.5452	4.16648
CGGA_1737	1952	0	12.1023	2.28621	5.88598	4.71051	4.44848	0.189508	1.4175	0.879049	0.0379116	1.21801	0.0537937	4.07226	5.41851	6.90669	2.00358	0.146052	4.98598	4.16408	2.7949	3.80236	2.76852	2.42751	7.48482	8.91048	3.60775	1.72573	3.68832	2.26756	1.67768	4.62867	2.01792	6.87563	3.07586	2.94768	3.28678	5.03468	0.902291	0.468342	-0.00268873	0.378359	0.293354	4.5373	3.4766	3.89016	5.35962	4.9295	4.8937
CGGA_1592	1588	1	10.5411	3.56175	6.88968	5.30898	2.40035	-0.00684111	2.45279	1.26664	0.408624	2.0833	0.248072	4.24574	5.88311	7.38926	4.08249	0.17214	5.80817	5.36718	4.2588	3.90246	3.67252	3.44707	5.91895	7.2407	4.4358	1.15507	5.58869	2.04723	1.90569	5.43307	2.04894	5.59323	4.01858	3.20742	3.28395	6.59501	0.474838	0.23367	1.05108	0.317311	0.210054	3.92058	4.19044	4.04937	5.46878	4.28386	5.4052
CGGA_P388	293	1	9.61634	3.11499	5.40698	5.41641	4.48446	0.170694	4.37343	0.99705	1.23679	1.30124	0.0948405	5.80939	6.3612	6.45033	2.55003	0.67871	7.09761	4.29966	3.42151	4.72583	3.50051	2.72857	6.14282	6.38841	2.96287	0.59212	3.29652	5.76826	1.06706	4.69366	5.27119	5.85443	5.86923	3.11046	3.65643	6.0074	0.451285	0.00647017	0.355063	1.65019	0.013027	4.50741	3.19435	4.2733	5.95819	3.68811	5.56579
CGGA_815	2219	1	9.50471	2.76547	4.23456	5.88832	4.7866	0.00142661	4.6588	0.201154	0.0781413	1.77143	0.0580076	4.75149	5.40072	6.15093	2.72988	0.376223	6.78132	4.0502	3.53363	3.41577	2.97568	2.41932	5.83274	8.72975	3.27884	1.16791	5.08674	3.89967	1.16553	3.83346	4.91016	6.86137	4.31151	2.60832	4.70265	6.57355	0.841462	-0.0157711	0.052946	3.23854	0.0173814	4.3819	3.68899	3.25675	5.27296	4.05345	5.15152
CGGA_261	4130	0	12.3091	2.12449	5.33388	6.41338	4.0432	0.0301116	2.77434	0.162246	0.0233367	0.932639	0.00184609	3.7389	5.32038	6.15803	2.16124	0.180741	5.40461	4.21442	2.83135	2.84848	3.20595	2.58789	5.4165	8.59206	2.53691	1.35995	3.28663	2.31228	1.94553	5.6391	2.73794	5.52482	3.78103	2.6223	3.39994	5.25081	0.270217	0.25364	0.0318586	-0.0305278	0.0606021	3.36045	3.09599	4.00015	4.46884	3.5575	4.18333
CGGA_1284	97	1	9.75984	3.333	5.78171	4.69734	4.32306	0.00142661	5.64682	2.57271	0.512723	0.425386	-0.0417113	5.44336	6.26665	7.59783	1.99132	0.130617	6.7821	4.26396	3.84691	4.18741	4.564	2.82589	7.15273	7.17839	4.95609	1.42387	2.28871	2.77039	0.511276	4.05642	5.82124	4.67839	6.32927	3.73689	4.36945	5.40373	0.168874	-0.0157711	0.465759	0.556324	0.102616	4.04698	3.45341	2.22792	5.95391	4.10174	4.78357
CGGA_583	3107	1	6.36941	1.58007	2.72328	3.7577	1.8609	-0.00684111	2.10534	0.461166	0.0379116	0.474132	0.0398427	1.41577	2.8459	2.5422	0.884603	0.159155	3.11195	2.11353	1.61171	1.14385	1.07523	0.932686	1.98022	4.98309	1.7002	0.320318	2.86638	1.28069	0.390459	0.937735	0.818562	2.95553	1.34189	1.1372	2.6864	2.95963	0.00125961	0.00647017	-0.00268873	0.390271	0.013027	1.44749	1.38467	1.72303	1.88922	1.30275	2.49517
CGGA_1192	3080	0	10.7844	3.08304	5.12533	5.57727	4.73671	0.29892	4.41226	0.599104	0.113581	1.96028	0.330354	4.82751	6.21545	6.19972	2.32227	0.210403	6.81121	4.58342	3.101	3.95958	3.89904	2.40969	6.43142	7.59747	3.62728	0.556431	4.72414	4.04516	0.838183	3.65962	6.18065	5.8136	6.08	3.14255	3.46323	5.21154	0.742946	0.174237	0.162022	0.214037	0.121522	4.38729	3.1327	4.35763	5.56064	4.64023	4.89801
CGGA_1434	67	1	10.1956	3.3022	5.75217	5.2735	5.00696	0.0540532	4.55776	1.45243	0.0762921	1.02874	0.08129	5.46352	6.34754	5.97497	2.38222	0.259883	6.62795	4.77952	3.33666	4.66092	3.76526	2.84458	6.22556	7.40579	4.48705	2.76409	3.40513	4.38234	1.62625	4.24759	6.39206	5.42173	6.17885	2.88908	3.69154	5.04394	0.565686	0.174237	0.19316	2.12048	0.536833	4.7114	3.18195	4.93849	5.41851	4.65873	5.56884
CGGA_838	4011	0	8.69579	3.72745	5.63611	5.25225	2.6235	0.0394878	1.884	0.0950856	-0.0910861	0.675012	-0.0417113	3.59253	4.22934	6.51961	3.44753	0.287524	4.64355	3.20885	3.49041	3.21746	2.69364	2.95671	5.06444	5.91592	3.16081	1.68691	4.48577	1.62184	2.44794	5.16808	1.23766	4.85769	2.2701	3.03193	3.18857	5.55344	0.547247	0.496653	0.042453	0.0191223	0.209239	4.05794	3.40156	4.21784	5.09219	3.6831	5.09574
CGGA_1155	1373	1	12.0292	2.07941	5.04822	4.17018	4.85055	0.132543	1.96923	1.81191	0.348556	1.35025	0.0537937	4.41627	5.2047	6.16871	1.64009	0.17214	4.83811	4.27052	2.98746	4.21001	2.78296	2.06168	8.22688	9.14208	2.55708	2.06587	3.1113	2.51751	1.13763	4.16545	2.20015	7.16311	3.43722	2.76733	3.12752	4.36556	0.151663	0.124765	-0.00268873	2.39051	0.23436	4.46849	2.96856	4.03964	4.83053	5.25842	4.1905
CGGA_502	4414	0	10.4322	2.1358	5.8299	5.23585	3.51247	0.00142661	3.74851	0.239086	0.250507	0.959129	-0.0417113	3.29381	5.21596	6.44377	3.02654	0.229179	5.83242	4.18617	1.62359	3.59446	2.65256	1.04438	4.71183	5.68003	2.1488	0.824046	2.33047	3.1513	0.636386	3.05205	3.54867	5.7194	3.46719	2.28489	3.94916	5.8789	0.279901	0.423758	-0.000553072	1.40461	0.0319266	4.35182	3.53118	3.59923	4.00935	3.92591	3.38041
CGGA_1140	921	1	9.49721	1.92301	4.71392	5.88879	4.10838	0.0670851	2.35591	0.312206	0.0781413	0.529133	-0.0417113	4.1279	4.86383	7.21021	1.38932	0.7106	5.86532	1.14827	4.04818	2.26018	2.31189	3.05559	8.05321	9.22773	3.43983	2.32101	3.57804	1.02808	4.03562	8.11427	2.37351	5.60034	3.19944	3.54044	3.74894	4.73178	0.14755	0.633326	0.0211608	0.22259	0.583277	4.52471	2.66175	3.88149	5.70684	4.58391	5.4426
CGGA_P158	1510	0	6.47593	2.63835	3.42745	3.12	1.78637	-0.00684111	1.45903	0.783567	0.0508303	0.201628	0.0257529	2.24374	2.61748	2.67089	1.02043	0.17214	2.62451	3.02481	0.76199	1.81263	0.839667	0.626171	2.32745	4.44158	2.14018	0.287733	2.91138	0.732634	0.514446	1.92303	0.909548	3.28719	1.06389	0.999185	2.88922	2.46529	0.00125961	0.0201289	-0.00268873	0.0738302	0.054697	1.70297	1.26244	2.19908	1.93045	1.93274	2.71395
CGGA_194	2304	1	10.8663	2.849	5.58152	5.29761	3.8157	-0.00684111	2.49614	1.58428	0.547754	0.811975	0.0676086	4.38979	5.40038	6.61522	2.32567	0.409836	6.09938	4.7946	3.07581	3.5555	2.90393	2.89275	6.74148	8.26289	3.41513	2.22769	5.13694	2.02087	2.72759	5.25663	3.28873	5.84488	3.51612	3.08915	3.34503	5.27987	0.327937	0.634373	0.0980086	0.214037	0.134515	4.26344	3.47906	4.10909	5.73033	4.17107	5.11032
CGGA_P315	451	1	11.0759	2.19959	5.46025	4.08225	4.63097	0.0540532	2.02067	1.56551	0.0888399	1.67409	0.160713	4.65817	5.89561	6.13355	1.61693	0.146052	5.62551	5.00151	2.61875	3.64305	3.32268	2.34846	7.38551	7.0121	3.03653	2.0354	2.84333	2.96034	2.35611	5.04606	2.85336	6.4812	3.64595	2.97691	3.53114	4.42784	0.340715	0.702174	0.0483933	0.17336	0.841649	4.46275	3.45294	4.41508	4.75084	4.80255	4.95279
CGGA_1318	1497	0	10.5007	2.79162	4.98535	5.1329	4.82973	0.0936718	4.07354	0.319722	0.408624	1.75439	0.664482	4.72737	5.67411	5.84876	2.28774	0.283997	7.21369	4.66838	3.23788	4.69073	3.63842	3.18564	6.23181	7.58026	2.88723	2.02302	3.69469	2.56459	0.379599	3.52561	5.66347	5.98717	5.64483	3.38684	3.13071	5.17573	0.692845	0.210205	0.528691	0.200602	0.23436	4.76163	3.21728	4.21692	5.1396	4.69494	5.19215
CGGA_D21	1208	1	9.87525	2.95439	6.02138	3.91697	2.66673	0.0487744	4.02182	1.82647	0.131458	0.791608	0.125354	4.71092	6.00082	7.61428	2.44004	0.0918458	6.19839	2.46902	2.78442	4.43536	3.97797	2.79406	6.99301	5.88161	2.88858	1.17604	3.24463	3.27903	1.45974	4.47566	4.55584	6.48346	4.37435	3.30366	3.10885	5.84779	0.114847	0.225815	0.042453	1.10988	0.308807	4.66565	3.09145	3.94541	5.57191	3.93297	4.83299
CGGA_1424	2692	0	6.48318	2.698	2.70023	3.0822	1.39492	0.0339544	0.995164	1.09936	0.252958	0.537743	0.121558	1.73012	2.97166	2.08026	1.30875	0.106009	2.25907	2.90512	1.30239	1.55133	0.861023	0.638048	2.08326	4.65407	2.98166	0.652428	2.93335	0.622866	0.514446	1.60321	0.835573	3.67265	1.38774	1.07412	2.91186	2.96213	0.00125961	0.256741	0.162022	0.159547	0.0270543	1.73686	1.2481	2.77884	2.23811	1.75403	2.95658
CGGA_P468	974	0	11.9987	3.89322	6.3494	5.74385	3.22659	-0.00684111	1.73694	2.99566	0.296309	0.430169	0.0398427	4.16454	6.28066	7.38051	3.34817	0.0648166	6.51691	6.23665	3.99406	3.93721	4.0175	2.79233	6.08942	2.74966	5.02005	0.433591	4.53641	3.58321	0.562953	4.3574	1.33697	6.34631	2.87644	3.47763	3.89222	6.54218	0.327937	1.42471	-0.00268873	0.0738302	0.108408	3.87173	3.52738	2.93595	5.72023	4.39294	5.48291
CGGA_543	4371	0	10.3393	2.1722	5.34726	5.34275	3.47102	0.00142661	2.37685	0.347481	0.0781413	0.776642	-0.0565184	4.00996	4.31944	6.47037	1.368	0.287524	3.99811	4.03104	2.42485	3.00968	1.6631	1.94097	7.14563	9.48892	2.00799	2.13887	4.65944	1.84075	2.77604	6.27871	2.29884	5.10457	2.90534	2.36367	3.40775	4.63409	0.0349322	0.866982	-0.000553072	0.135879	0.234755	3.82723	2.58811	3.90607	4.37833	3.67531	4.59941
CGGA_1156	3194	0	11.0342	2.67348	5.17233	4.76826	4.43135	0.0739577	3.99808	0.541634	0.230734	1.43802	0.0676086	4.75292	6.146	6.53462	2.09184	0.0924094	6.96775	5.10717	2.95397	4.40198	3.27289	2.51308	7.04467	5.71909	3.49575	3.31997	3.55312	2.94085	1.05383	4.42406	5.41833	6.0057	5.34199	2.93841	2.92304	5.17835	0.390816	0.221988	0.31239	0.117313	0.22226	4.6798	3.4766	4.68768	5.52466	4.85464	5.35702
CGGA_P316	567	0	11.9898	1.90233	4.46314	2.71411	5.47123	0.132543	2.18115	0.946637	0.137864	1.15754	0.978651	5.21877	5.67773	5.08735	1.16015	0.0508186	3.99315	2.30564	2.17286	4.38925	2.14275	1.54892	9.22218	9.50138	2.19658	1.24008	0.908738	1.53436	2.35611	5.42134	1.03172	6.89022	2.28168	2.27065	4.57744	2.92138	0.702994	0.23367	-0.00268873	0.214037	0.316277	4.20556	1.89425	3.92098	3.51653	5.53021	3.80975
CGGA_1034	753	1	8.09122	2.97596	5.08582	5.02226	4.01082	0.00142661	4.40389	0.543405	0.0781413	0.65866	-0.0417113	4.93348	6.00403	6.34775	2.54143	0.130617	7.84159	3.98924	3.19417	3.61078	3.86128	2.77041	15.9465	6.64413	4.87901	1.01406	4.4267	3.57332	0.511276	3.46434	4.16576	4.85956	5.48462	3.3906	3.9135	5.69689	0.125846	-0.0157711	0.0318586	-0.135597	0.00269431	3.43441	3.06861	2.95346	6.3685	3.16479	4.93496
CGGA_652	476	1	10.8847	2.88726	5.96169	5.47215	3.07351	-0.00684111	3.35623	0.724725	0.196674	1.2634	0.341727	4.81105	6.35084	6.74198	2.37242	0.331044	6.75077	4.25347	3.37618	3.55187	3.58681	3.22436	6.80999	8.1691	2.87383	2.91337	3.46471	2.92705	2.84683	6.27128	3.97863	5.8583	4.18019	3.11532	4.03552	5.35767	0.451285	0.734858	0.0650905	1.04108	0.536833	4.4804	3.69368	4.43846	5.5279	4.73311	5.41026
CGGA_659	730	0	7.93547	2.04073	5.18221	4.25673	4.07324	0.0939191	1.37169	0.912863	0.378272	1.5767	0.356626	4.49458	4.45089	6.57194	1.4859	0.735954	4.03419	0.856069	4.20887	1.94097	1.98771	3.29748	8.09046	7.05725	4.2639	3.32741	3.99424	0.632353	4.61614	8.16011	2.67179	4.314	1.78292	3.21568	3.75022	4.00267	0.467257	0.904403	0.180936	0.480224	1.02387	4.52088	2.11208	4.98295	3.37892	4.76291	4.37854
CGGA_112	1534	1	10.3811	3.07944	6.18263	5.29553	4.02638	0.0540532	3.05386	0.429763	0.348556	2.17977	0.330354	4.1866	6.10613	6.43825	2.58673	0.132828	6.15361	4.65236	3.26014	3.82811	3.6034	2.8209	6.08987	6.86676	4.45215	2.86539	3.03429	2.01707	0.724541	4.04429	3.45792	5.6221	4.51042	2.95321	3.3355	5.21154	0.427374	0.279431	0.081628	0.0738302	0.281751	4.5992	3.79542	4.83996	5.22399	4.47223	5.60657
CGGA_323	4338	0	7.45709	2.29123	5.64245	5.1661	4.01082	0.0761125	1.01679	0.347481	0.233935	1.71336	0.850876	4.48456	4.74182	7.28019	1.8951	0.631746	4.45071	0.867833	4.69041	2.25477	2.20067	3.86435	7.72638	8.07054	3.69772	3.52213	4.07895	0.28956	4.73289	8.52246	1.94472	4.19153	1.74922	3.71029	4.14588	4.3986	0.772706	1.0629	0.541888	0.548075	0.970504	5.19321	1.7856	4.58897	3.68494	4.76164	5.32837
CGGA_1400	2742	0	12.4882	1.80366	5.2224	3.06799	4.13195	0.0936718	0.907364	1.51256	0.0248644	0.647765	0.0537937	4.78071	5.73641	6.12465	1.70175	0.106009	3.48536	4.37125	2.58205	5.16671	2.67315	1.51943	8.31447	7.31591	2.62334	0.773381	1.1976	1.01793	0.600554	4.19754	0.533372	7.80279	1.73046	2.68143	4.20801	3.79535	0.0782527	0.873011	-0.00268873	0.342035	0.246358	4.23986	2.27557	3.96228	3.78853	5.92701	4.43363
CGGA_619	550	1	11.1004	2.53782	5.32683	5.179	5.46129	0.0936718	3.52972	0.511995	0.0248644	1.08736	0.0537937	5.16834	6.02761	6.23324	2.42071	0.0366828	6.51319	3.30428	2.40576	3.75242	3.51281	2.53767	6.38829	8.27105	4.00054	1.76379	4.18731	4.43227	1.15007	4.20601	3.86471	5.7014	4.11243	3.2209	2.90436	4.79055	0.630546	0.00647017	0.0145069	2.23992	0.013027	4.43846	3.55318	3.99767	5.777	4.26381	5.5065
CGGA_448	354	1	10.4601	2.77402	5.4887	5.18356	4.2845	0.00142661	5.5802	3.42543	-0.0330414	0.65866	-0.0417113	5.77317	6.61126	5.71152	2.0781	0.0248145	6.67725	4.60915	3.93296	3.74178	4.24185	2.49913	6.10189	9.61619	4.0523	2.45183	1.91305	3.30906	0.695587	3.74955	6.62947	5.29372	8.3465	2.77364	4.05086	5.28844	0.125846	-0.0157711	0.162191	0.0191223	0.129988	4.23303	3.66002	2.47049	5.7321	3.57176	5.28999
CGGA_1739	515	1	10.7109	2.30945	5.64573	5.29276	4.19089	-0.00684111	2.94084	2.20397	0.101269	0.666928	0.134731	4.99226	5.5307	6.86591	2.28774	0.159155	5.9778	4.32818	3.34259	4.09116	2.89956	2.66884	6.91098	9.54494	3.27367	2.5273	4.41901	2.42682	1.67768	5.33514	4.08063	6.18251	5.33111	3.1473	3.12912	5.39466	0.498045	0.86569	0.130311	0.962812	0.349977	4.67145	3.41335	4.38207	5.71907	4.69712	5.30654
CGGA_694	1194	1	11.0777	1.75261	5.07047	5.88832	3.82874	0.00142661	3.59869	0.324056	0.362749	1.054	-0.02705	4.34593	5.38754	6.21111	2.15645	0.276042	6.84361	3.80051	2.92214	3.94155	3.04113	2.47202	6.66128	8.66663	0.9989	0.709205	3.81514	3.24279	0.656354	3.60153	4.61184	6.23265	5.2333	2.7867	3.84592	5.78041	0.136747	-0.0157711	0.042453	0.488892	0.0173814	3.64	3.11183	2.99384	5.29556	3.81942	4.48826
CGGA_P5	378	1	9.54764	3.75424	6.04969	5.34382	4.29416	0.0339544	5.67363	1.21911	0.285605	0.990895	0.08129	5.18648	6.40418	6.29575	3.13759	0.197762	6.82914	5.23693	3.66338	4.44558	4.10123	3.17908	4.97481	9.18791	4.38255	0.905735	3.67936	3.44825	1.49809	4.59777	3.89582	5.41953	5.80016	3.36443	4.4259	6.19442	0.427374	0.245254	0.081628	0.568799	0.197742	3.99155	2.73401	4.07446	5.64241	3.66373	5.81531
CGGA_P510	912	0	10.4669	3.08483	5.24981	5.9565	3.64062	-0.00684111	5.7184	2.99051	0.113581	0.82059	0.198815	5.63666	6.23725	6.45474	3.42374	0.545589	6.7813	5.3195	3.71879	4.02449	3.90206	2.9859	6.3132	9.16583	3.16387	1.11352	4.58116	4.46808	0.618972	4.29723	5.12295	5.71124	6.94795	3.16765	4.82206	6.35478	0.137252	0.23367	0.0980086	1.75704	0.0270543	3.97845	3.8544	3.25993	6.12386	3.313	5.53849
CGGA_1132	3251	0	10.6632	2.1924	4.66173	4.8598	3.42511	0.0339544	1.95968	0.580207	0.0248644	1.59947	0.198815	4.15784	5.34764	5.32508	1.78141	0.119482	6.04333	3.9308	2.62391	3.13006	2.87529	1.97668	7.33544	7.56387	1.30355	1.87895	3.71487	2.19233	0.609794	3.77151	4.17469	5.53314	3.57826	2.41067	2.51204	4.75018	0.427374	0.210205	0.253803	1.37997	0.17279	4.13464	2.67254	3.40875	5.1001	4.57204	4.18283
CGGA_1345	2825	0	11.3787	1.85159	4.9332	4.96917	6.00578	0.29892	3.17899	1.52234	0.0762921	2.0269	0.260124	4.73499	5.14732	6.38947	2.08368	0.106009	5.30774	3.33842	2.57405	4.13458	2.62809	2.58551	7.89365	8.61235	2.33316	0.583284	2.50634	3.77147	1.06706	4.50407	3.73437	7.02857	4.98151	3.05396	4.35003	5.18184	0.249019	0.0864553	-0.00268873	3.79519	0.0951706	4.56503	3.07128	3.27222	4.90402	4.81845	4.81534
CGGA_P286	658	0	11.1291	3.00904	6.18393	4.98481	3.15298	0.0136576	1.76471	0.541634	0.113581	1.37416	0.0537937	4.41444	5.76659	6.54425	1.99047	0.0508186	5.51611	5.58802	2.9379	4.1683	2.92339	2.66639	6.76055	5.21511	3.55562	2.32587	4.89143	1.28714	1.47876	4.48312	2.25963	6.33568	3.22058	3.1362	2.80079	5.26405	0.486484	0.998522	0.0145069	0.159547	0.185321	4.62238	3.59991	4.2864	5.11151	4.80215	5.36097
CGGA_1350	2819	0	6.91794	3.17324	3.82205	3.84758	2.55508	-0.00684111	2.07473	0.894351	0.0379116	0.657377	0.0398427	2.4409	3.20098	2.79634	1.02962	0.17214	3.19569	3.99457	1.57178	2.61543	1.24326	0.835011	2.88547	6.92846	3.41814	0.905735	4.61994	1.03347	1.49328	1.97515	0.775062	4.13763	1.12703	1.27554	3.25233	3.63634	0.598449	0.23367	-0.00268873	0.102961	0.0951706	2.25544	1.54264	3.04079	2.84472	2.38144	3.29845
CGGA_P113	1708	0	9.17974	3.3022	5.90736	5.25645	3.01717	-0.00684111	3.0649	0.408432	0.230734	0.608688	0.0257529	4.34291	5.27834	6.45929	3.15033	0.980594	5.63338	2.52558	4.50722	2.99292	3.41392	3.81948	6.06054	7.79428	4.67356	3.06122	4.69505	1.50162	3.69546	6.85204	2.73853	4.89787	2.51516	3.46909	4.17097	5.3869	0.509522	0.880293	0.177661	0.292164	0.425613	4.17425	3.66638	4.42012	5.04657	3.93874	5.31749
CGGA_1137	3237	0	6.19572	2.15212	3.79786	3.3936	1.83161	-0.00684111	2.84139	0.440309	0.063623	0.506275	0.0537937	2.52914	3.9142	2.23087	1.02962	0.0366828	3.03679	2.18408	1.38523	2.10907	1.3491	0.913735	3.00831	5.06842	1.95551	0.685738	3.77135	2.01325	1.30785	2.06162	1.79453	3.77916	4.9214	1.60217	3.15593	3.49466	0.00125961	0.00647017	0.0980086	0.774396	0.0270543	1.99838	1.27662	2.73844	2.34021	1.74956	3.37668
CGGA_P110	800	1	10.0191	3.99587	6.24182	4.80875	7.17945	0.170694	3.74687	4.04236	0.101269	2.03835	0.717589	4.75292	5.98297	6.90027	3.94205	0.247672	6.80179	5.33569	4.01361	3.73041	4.70102	3.70434	5.62992	4.69753	4.14952	0.453219	4.9189	2.11636	0.749703	4.51502	2.69515	5.05916	6.04275	3.61586	3.48053	6.33195	0.520916	0.0864553	0.0315332	0.329725	0.0951706	4.19716	3.58642	4.2895	5.74126	3.53313	5.65849
CGGA_P181	238	1	9.89486	3.53678	5.8414	6.02699	3.43262	0.0339544	5.47929	0.663315	0.219478	1.70293	0.295674	4.43382	5.90683	6.14141	3.52271	0.106009	6.5249	4.34502	3.62944	3.65205	4.32335	2.99732	5.42339	9.15129	4.51637	1.53563	4.57028	3.53156	1.39857	4.37911	4.64004	5.1407	5.39962	3.18769	4.09446	5.88038	0.137252	0.00647017	0.081628	0.279428	0.013027	4.15963	3.63413	4.24606	5.89126	3.84676	5.5365
CGGA_1527	1714	1	11.4749	2.76885	5.9069	5.54812	3.97965	-0.00684111	3.89038	0.375817	0.185121	1.52629	0.272073	4.52542	6.14909	6.68206	2.09994	0.222934	6.94636	4.10962	3.03145	3.76791	3.61476	2.73787	5.91347	8.08034	3.59325	1.59632	3.71362	2.72703	1.47876	4.20217	4.01663	5.64643	4.82448	2.82966	3.40348	5.35994	0.772261	0.65164	0.698015	0.117313	0.382891	4.22791	3.52382	4.14903	5.46934	4.60192	5.04368
CGGA_834	4013	0	9.97807	3.6518	5.97122	4.85349	3.1818	0.00142661	3.71974	2.37058	-0.0715466	0.0670626	-0.02705	4.72	6.57621	6.95984	3.50307	-0.0454878	6.4851	5.03353	2.25092	4.38767	4.20296	2.81533	5.62552	4.50644	4.40102	4.12897	4.45	2.8211	0.87029	4.34358	3.17223	6.44093	5.76246	3.38449	4.37034	5.78828	0.354719	-0.0157711	0.152698	0.636185	-0.0271169	3.53998	4.04639	3.8892	5.6292	5.36725	4.94602
CGGA_336	2549	1	10.9012	3.54432	6.1752	5.32939	2.9873	0.0540532	1.85009	0.879049	0.681499	1.61469	0.0948405	4.17856	5.70032	6.91099	3.01305	0.409836	5.81288	5.63534	4.14438	3.75449	3.61099	3.20192	6.16874	5.9271	4.88944	2.88877	4.8706	1.61298	1.93037	4.4887	3.48143	6.40834	4.62584	3.31422	3.10825	6.08345	0.520916	0.901911	0.253803	0.200602	0.477258	4.12299	3.46917	4.61945	5.58095	4.76605	5.64003
CGGA_D46	300	1	11.5903	3.56603	5.85583	5.39264	3.82038	0.341717	1.59937	1.3713	0.527109	2.06056	0.937281	4.29524	7.71117	4.41609	3.35135	0.0110258	6.56684	4.33758	2.65175	3.87404	3.80045	2.84686	5.08377	3.61974	3.03371	2.58314	4.12708	2.95048	2.1276	3.39075	2.13953	5.6403	3.4607	2.70454	3.5441	6.89186	0.995372	1.22261	0.507938	0.253737	0.622895	3.96477	2.80552	4.67451	5.63867	3.90105	5.38444
CGGA_1111	2696	1	11.4609	2.4347	5.28759	4.9857	4.85197	0.226628	3.36338	3.24719	0.063623	1.00615	0.0398427	4.55036	5.15359	6.37515	1.98607	0.222934	7.16449	4.72219	2.65444	4.12444	3.59194	2.26759	7.16068	8.10206	2.84893	0.833784	2.48853	2.94085	0.464148	4.02413	4.13028	6.59905	5.77998	3.35776	3.49032	4.9334	0.327937	0.00647017	0.0145069	0.131526	0.108408	4.83681	3.51667	4.08175	5.81557	5.00358	5.17544
CGGA_488	435	1	8.07195	2.99346	6.82536	5.5173	2.66673	0.170237	1.884	2.1827	0.0781413	1.15389	-0.0417113	4.98731	8.55831	4.9163	1.67825	-0.0454878	5.53681	7.46379	3.94885	4.35738	3.94012	2.43955	3.54858	3.72065	4.34223	3.68909	5.07618	2.78748	1.08308	2.66891	2.00813	5.4543	3.06368	0.125533	3.16898	3.14859	0.433726	0.0943584	0.052946	-0.017945	0.0887415	4.94867	2.09872	4.75467	2.30898	4.89898	7.62383
CGGA_1743	1361	1	10.9004	2.48443	5.48558	5.67862	3.87092	0.113199	1.89595	0.783567	0.113581	1.12986	0.0676086	4.54375	5.55048	6.47625	2.03367	0.660432	5.94933	3.32664	3.47336	3.10137	3.05973	2.90094	7.01718	8.54391	2.96076	3.49251	3.34781	1.65317	3.38149	6.38816	3.11503	5.70818	3.12509	3.09903	3.3572	4.90663	0.598449	0.590231	0.162022	0.366351	0.446498	4.32459	3.22333	4.35705	5.47836	4.39956	5.21197
CGGA_1583	1606	1	10.3316	2.09895	5.30143	4.75607	4.61525	0.189508	1.5893	0.296642	0.063623	0.750241	0.0537937	4.49599	4.79148	6.08389	1.89484	0.259883	5.62582	2.36406	3.35584	3.40471	2.60083	2.63665	7.59635	7.37416	2.77136	3.27572	4.10712	2.00173	4.2262	6.31569	3.58885	6.18504	3.0638	3.09574	3.40478	4.5731	0.262449	0.957947	0.208522	1.513	1.22351	4.786	3.22484	4.51298	4.02304	4.82632	4.5055
CGGA_2006	626	1	9.70289	3.17324	6.02159	5.05894	3.01421	-0.00684111	5.26949	1.55603	0.0888399	0.201628	0.0537937	5.08586	6.14367	5.81705	3.7078	0.185008	7.11069	6.30376	3.8086	4.05041	4.01566	3.26963	6.09239	4.46062	4.13176	1.83689	3.95397	4.41673	0.115759	3.49812	3.99142	5.50389	6.38163	3.25326	3.74508	6.24909	0.0782527	0.290637	0.0650905	0.159547	0.0270543	3.45222	4.81453	3.82091	5.77413	3.36145	5.06518
CGGA_1003	3817	0	10.5334	3.09556	5.28458	5.07185	4.10683	0.0339544	1.57051	0.273178	0.0762921	1.22457	0.235918	3.72015	4.62994	6.22905	2.13972	0.342568	6.49367	4.97463	3.57618	3.24507	2.78535	2.55114	6.66205	5.09704	2.55141	1.79717	5.64304	0.945738	2.02487	4.36286	2.13788	6.39635	2.59277	3.3497	2.20561	5.1023	0.838615	0.72676	0.19316	0.131526	0.258255	3.92867	3.18195	3.8508	5.07578	4.49946	4.51729
CGGA_1127	2630	1	12.0971	1.63695	4.96271	4.13836	5.55635	-0.00684111	2.24137	1.74283	0.0508303	1.62476	0.0398427	4.51475	4.65412	5.93972	1.53247	0.0508186	4.43052	3.31774	2.24378	4.48004	2.28749	1.93415	8.42116	9.8411	2.40142	1.56197	2.70681	2.59762	0.928575	3.97095	1.85496	7.15216	3.54969	2.50049	3.83016	3.87225	0.576683	0.268133	0.0145069	1.47377	0.108408	4.41314	2.75166	3.48126	4.32921	4.87971	4.0231
CGGA_1580	1581	1	11.1763	3.31125	5.83921	5.89349	3.90548	0.0540532	4.85225	0.386773	0.196674	1.05833	0.121558	4.21473	6.08076	6.28779	3.07585	0.319426	6.78813	4.81249	3.54997	4.17885	3.86945	3.23385	5.69564	7.55266	4.01716	1.14921	5.03213	2.79186	1.15007	3.63842	4.41398	5.68082	4.8185	3.43934	4.05411	5.97005	0.520916	0.643033	0.0315332	0.436975	0.17279	3.87258	3.85074	4.14627	5.59482	3.94428	5.07143
CGGA_1183	408	1	10.9498	3.05762	5.28947	5.29171	4.07862	0.208152	2.46627	0.249316	0.113581	1.96428	0.173528	4.27669	5.41613	5.93856	2.18968	0.106009	7.21504	4.4777	2.58471	4.20707	3.73011	2.4216	6.36388	6.78494	4.05171	0.702094	0.935951	3.02647	1.08017	3.19246	3.82836	6.33753	3.73873	3.35239	2.94512	5.10601	0.165944	0.033653	-0.00268873	1.9663	0.013027	4.49372	3.67695	4.72933	5.13663	4.42676	5.18534
CGGA_1094	252	1	10.7799	4.23623	6.24264	4.96964	4.77044	0.0301116	3.57823	1.28008	0.439167	0.978654	0.0301918	4.72181	5.58436	5.61768	1.67213	0.0110258	6.18981	5.22888	1.8677	6.18858	4.37726	3.84203	4.11624	7.28692	3.50049	1.93367	3.587	3.03167	1.97729	2.87213	3.56517	6.0474	4.08652	2.99154	3.78814	5.16491	0.399244	0.411285	0.162191	0.371672	0.424665	5.25918	2.04114	5.89359	3.66069	5.40304	5.1771
CGGA_241	4809	0	8.36697	2.23789	5.19264	4.31141	3.50279	0.00142661	2.2289	0.613226	0.283236	0.464059	-0.0417113	4.22999	3.99423	6.11308	2.43587	0.51941	4.0966	2.24387	3.84573	2.25748	2.0561	2.85519	6.71767	6.87007	4.16114	2.86416	4.25944	1.29518	4.00926	7.2201	2.51416	4.03732	2.3145	2.8586	3.59379	4.39687	0.14755	0.904403	-0.000553072	0.158079	0.367851	3.72525	2.60191	4.80614	3.07175	3.96102	4.33853
CGGA_D15	3669	0	10.2525	3.2393	5.72379	3.78023	2.78473	0.0487744	0.36156	0.743876	0.113846	1.29344	-0.02705	3.79519	4.40592	6.32385	3.48227	0.168372	3.38995	5.2023	2.81387	3.93697	2.20997	2.86142	5.75654	7.17011	2.36651	2.28044	5.37218	0.624828	1.49012	3.84766	0.785358	5.9906	1.59895	3.10847	3.63117	5.45903	0.3085	0.904403	-0.000553072	0.427026	0.196317	4.04038	3.54073	4.32068	4.11895	4.3869	4.70722
CGGA_1207	3049	0	11.1869	2.16323	4.90248	4.58514	4.93196	0.0136576	1.43148	0.364776	0.0762921	0.732124	0.0257529	4.02267	4.91211	6.31	1.76586	0.431575	5.93993	3.1833	3.4326	3.72618	2.55598	2.48236	7.85735	8.53309	2.57395	2.40814	4.12783	2.46049	3.57024	5.92052	1.89379	6.53767	2.91052	2.9769	3.43939	4.66735	0.315055	0.643033	0.0650905	1.24036	0.68439	4.54172	3.04897	4.2808	4.51447	4.67254	4.22655
CGGA_1215	29	1	10.0816	3.17581	5.60257	5.20213	2.8578	0.0301116	4.47185	1.77314	0.624965	1.1368	0.00184609	5.22739	5.98438	6.95377	2.92328	0.205164	6.90136	5.22295	3.14153	3.80535	4.20022	3.1556	7.15163	8.68749	3.33426	0.977795	4.54497	2.74732	0.456243	4.73496	4.01613	5.41804	5.55367	3.45085	4.08908	5.93997	0.0466753	0.000425285	0.0318586	0.135879	-0.0121375	3.29036	2.80043	3.81399	5.57977	4.35874	4.60689
[truncated: 186 more columns]
