# Supplementary material for: Characterization of the Ferroptosis-Related Genes for Prognosis and Immune Infiltration in Low-Grade Glioma
Source: Front Genet. 2022 Apr 26;13:880864. doi: 10.3389/fgene.2022.880864 (PMC9086515; doi:10.3389/fgene.2022.880864)
Supplement: Supplementary file 6 [file Table5.XLSX]

## Sheet: Sheet1
Table S5. Data for Univariate Cox regression analysis in the Rembrandt dataset
id	futime	fustat	RPL8	IREB2	CS	ACSF2	NOX1	CYBB	NOX3	NOX4	NOX5	DUOX1	DUOX2	G6PD	PGD	PIK3CA	FLT3	SCP2	ACSL4	LPCAT3	NRAS	KRAS	HRAS	SLC38A1	SLC1A5	GLS2	GOT1	ALOX5	KEAP1	HMOX1	ATG5	ATG7	NCOA4	ALOX12	ALOX12B	ALOX15	ALOX15B	ALOXE3	PHKG2	ACO1	ATG3	ATG4D	BECN1	MAP1LC3A	GABARAPL2	GABARAPL1	ATG16L1	SAT1	EGFR
E09801	1257	1	12.2397	6.2571	10.9661	8.1936	6.6001	6.9299	5.2232	4.867	6.7195	6.0891	5.5969	8.1956	6.4309	6.9663	5.8683	10.0339	7.2212	8.3785	9.8209	7.4106	8.9727	7.1138	7.8574	4.7894	8.4758	7.5203	9.4857	9.5217	7.788	8.1071	11.911	6.6229	5.568	6.0042	6.1084	6.1515	6.7573	9.6225	7.9567	7.4039	9.1508	10.2047	11.9655	8.556	7.1725	12.0066	9.9284
HF0702	252	1	12.3827	6.8654	10.9726	7.6043	6.6539	6.3979	5.0189	4.9985	6.727	6.1424	5.5033	8.5032	6.6491	7.7311	5.8764	10.8595	7.1927	7.7742	9.0254	7.3807	9.1521	8.8774	8.1732	4.9488	9.1447	6.9169	10.1212	8.8307	8.1037	8.3589	11.6725	6.5691	5.6319	5.8429	6.5003	6.0779	6.6059	8.961	8.2752	7.9502	9.3349	9.8168	12.8046	8.3055	7.3525	11.8339	12.1932
HF1090	252	1	12.2693	6.8009	10.4558	7.4757	6.8948	6.2513	5.2452	6.5498	6.6682	6.2184	5.7831	8.3757	6.423	8.7055	5.987	10.7845	7.2107	7.8607	9.43	7.5869	9.2047	8.3855	7.6915	4.9019	8.5043	6.87	9.6436	9.0701	7.6942	8.183	11.2599	6.7355	5.531	5.7665	6.2179	6.3495	6.709	9.0579	8.4278	7.9632	9.1701	9.6807	12.4116	8.2693	7.2458	12.2739	10.9544
E08021	2412	1	12.9057	6.6967	11.2226	7.6333	6.975	6.012	5.3643	4.9859	7.0094	6.605	5.7431	7.6215	6.4156	8.1172	6.7314	9.3484	7.2085	8.0897	8.5914	8.0334	8.8748	7.5043	8.3473	4.9264	9.035	5.7272	9.8203	7.4279	7.4948	7.8175	11.7978	6.8076	6.29	5.9866	6.4077	6.7444	6.7895	9.3132	7.7637	8.2578	8.6903	8.8846	11.5921	7.5323	7.253	10.7774	8.488
E09920	1758	1	12.582	5.9886	11.1963	7.6612	6.5988	6.307	5.1624	5.0246	6.5842	6.2336	5.8152	8.7486	6.3512	7.807	6.2101	10.3446	6.9956	7.5609	9.2834	7.5189	10.1294	8.4027	7.78	5.491	10.3694	7.1265	9.5526	9.6195	8.0508	8.16	12.186	6.7086	5.693	6.0585	6.4854	6.3658	6.7955	9.4311	8.1385	7.9776	9.2323	10.2795	12.5408	9.3115	7.0131	11.6471	8.1542
HF0670	2850	0	12.7531	6.301	10.9398	7.984	6.9615	6.5004	5.3041	4.8019	6.8908	6.4762	5.6965	8.2932	6.6103	8.453	6.3372	10.632	6.8226	7.9318	8.8339	7.4335	9.1767	8.7925	8.2353	4.9543	8.432	6.5934	9.7171	8.5492	7.2767	8.1665	12.1814	6.9486	5.8669	6.0854	6.8442	6.5335	6.94	8.8073	7.5077	7.8692	9.0174	9.4566	12.9656	8.4713	7.07	10.9683	10.059
E09959	1374	1	12.1059	6.676	11.1764	7.217	6.5996	6.1679	5.0356	4.8883	6.6301	5.9875	5.4784	7.9838	6.2039	7.8242	6.1629	11.0226	7.0391	8.0966	9.7035	7.1442	9.0608	7.4543	8.222	5.3399	9.4362	6.4883	9.6332	8.8405	8.2177	7.9881	11.6727	6.4979	5.6142	6.1052	6.4039	6.1786	6.6865	8.9601	7.6698	8.0296	9.6686	10.0833	12.5478	9.4505	7.3159	11.812	9.4976
HF0434	180	1	12.1381	5.7543	11.0491	7.9775	6.9933	6.016	5.238	4.9912	6.9167	6.411	5.9256	8.1309	6.4467	7.2496	6.3554	9.5825	7.2738	7.7496	7.749	7.4997	9.025	9.5589	7.8224	5.5064	9.6208	5.9977	9.4726	7.9787	7.4835	8.0333	12.0719	6.7826	6.0325	6.3608	6.4927	6.5234	6.8554	9.0487	7.4997	7.6593	9.157	9.9753	12.4773	9.2023	7.4264	11.1692	9.4296
HF1458	261	1	12.539	6.5684	10.8126	7.4432	6.5841	6.59	5.1399	6.2213	6.6569	6.2669	5.4813	8.5174	6.5977	7.3516	5.9893	11.0616	6.6127	7.7549	9.9061	7.4904	8.6479	7.6785	7.7647	4.9663	8.1254	6.7061	9.496	11.3455	7.9743	8.2557	11.4238	6.8495	5.5673	5.9107	6.2923	6.2603	6.8809	9.1451	7.946	7.5929	9.476	9.5269	12.2751	7.7191	7.2836	11.7971	11.0354
HF1551	2097	0	12.0958	6.5243	10.8882	7.7609	6.7059	6.1112	5.1357	4.9606	6.5517	6.131	5.6794	8.3451	6.2059	8.05	6.1082	9.9554	7.7479	7.8519	8.6346	7.6233	9.1247	9.2047	7.7014	4.9912	8.9506	6.4703	9.6999	8.0015	7.7112	8.2844	12.4207	6.5989	5.5573	5.9898	6.74	6.3069	6.842	9.5208	8.1581	7.7737	8.9553	9.4493	12.8518	8.5281	7.251	11.3984	9.2374
HF0460	315	1	12.5584	6.3056	10.6512	8.0594	6.7359	6.8621	5.1239	6.3177	6.7332	6.1459	5.7134	8.8769	6.6006	7.0194	6.0835	11.0219	6.9403	8.0182	9.8593	7.4759	8.825	6.4458	7.5836	4.8383	8.2603	7.9496	9.4907	11.2436	8.1396	8.0789	11.4176	6.5935	5.6382	6.0007	6.2021	6.4341	6.6604	9.0337	8.08	7.6735	9.3696	9.8966	12.2729	7.7658	7.0394	12.0234	10.512
MD554082	816	1	12.7133	6.6016	10.8799	7.242	6.6502	6.2329	5.0645	6.0272	6.5594	6.258	5.569	8.1529	6.3749	7.4774	5.8681	10.7641	6.8323	7.9257	9.7611	7.4909	9.3312	7.3393	7.8012	4.8374	8.2544	6.0741	9.9092	8.9676	7.96	8.0622	11.0889	6.5013	5.4923	5.633	6.0006	6.3689	6.7968	9.3168	7.8085	9.2145	8.6683	9.8208	11.7548	7.512	7.3776	11.8639	10.3063
MD508984	660	1	12.7534	7.1581	11.3393	7.4905	6.7503	6.006	5.1612	5.2189	6.5117	6.4173	5.4888	8.1044	6.4739	7.5677	6.3101	10.6795	7.1733	7.8541	9.9113	7.2485	9.6739	8.9862	7.9075	4.9	8.7797	5.7603	9.31	8.3142	8.0183	7.9681	11.8802	6.6265	5.4601	5.8334	6.1084	5.9255	6.6943	8.781	7.9889	8.3049	9.3557	8.51	11.8969	7.9235	7.5304	11.5022	7.5915
HF0026	1689	1	11.6095	6.1747	10.8352	7.2872	6.8404	6.1133	5.3326	4.7987	6.746	6.307	5.737	7.8455	6.2283	8.1288	6.4716	10.226	7.8447	7.6971	8.7503	7.8388	8.8786	8.7498	7.3328	5.5302	10.2341	6.1037	9.2661	8.0712	7.5777	7.8879	11.9222	6.7999	5.6724	6.1581	6.6405	6.673	6.9355	9.3277	7.5489	7.4617	8.999	9.8507	12.5901	9.5442	7.3097	11.6925	9.1048
HF1502	189	1	11.8645	6.5139	11.0106	7.7935	6.7676	6.0034	5.2482	4.638	6.7605	6.2995	5.8163	8.2015	6.4071	7.9363	6.055	9.9802	7.2658	7.6478	8.2212	7.4218	9.6388	8.7362	7.5877	5.9588	10.896	6.3387	9.1966	7.2449	7.6779	7.9893	11.8063	6.6145	5.9871	6.2966	6.4928	6.2266	6.7328	9.1797	7.8478	7.7967	9.0847	10.4434	12.7591	10.0015	7.3978	11.6492	8.6085
E10483	1965	1	12.5495	6.6269	11.0385	7.9808	6.8351	6.4578	5.0828	4.9488	6.8005	6.25	5.6567	8.4943	6.4425	7.6335	6.2776	11.1773	7.2103	7.7664	9.0986	7.5159	9.4021	8.0915	7.9523	4.9435	8.4696	6.5377	9.5975	8.8067	7.7072	8.5248	12.2671	6.6668	5.7791	5.9746	6.1781	6.4381	6.7705	9.5905	7.9506	7.6498	8.9725	8.4075	12.8102	8.5579	7.3785	12.7713	9.1987
HF1186	594	1	12.1805	6.4751	10.9312	7.5636	6.9777	6.3299	5.2544	5.071	6.7045	6.3444	5.673	8.677	6.3968	8.9125	6.0832	11.0049	7.3442	8.1466	9.3845	7.6371	8.5832	7.9877	7.7314	4.9501	8.294	6.9566	9.8546	9.0189	7.8395	7.8027	12.2914	6.7219	5.4788	5.7097	6.1228	6.3993	6.8188	9.4199	7.8911	7.8299	9.1966	9.2143	12.5118	8.1352	7.2261	12.1627	9.123
HF0316	2169	1	11.9617	6.1895	10.9196	7.6899	6.69	6.5872	5.0711	5.101	6.6065	6.0729	5.6865	8.549	6.3872	6.8554	6.0531	10.7987	7.6013	7.9467	8.886	7.5313	8.857	8.1555	7.9131	4.8083	8.5161	7.5494	9.5127	10.5981	7.8285	8.302	12.2892	6.5824	5.6103	5.9897	6.4988	6.3514	6.6466	9.3765	7.643	7.8477	9.2559	9.874	12.3833	8.6079	7.2837	12.111	11.0549
HF0954.2	324	1	12.2331	6.2308	10.7646	7.6515	6.5974	6.215	4.9547	4.7664	6.6202	6.1128	5.7094	8.484	6.6326	7.0864	5.8111	10.852	7.4315	7.8497	9.0295	7.3604	9.4461	8.3471	7.8094	4.8904	8.4773	7.4552	9.9536	9.7314	7.9729	8.2313	11.334	6.5682	5.724	5.9414	6.1333	6.0569	6.9028	8.3727	7.8158	8.5096	8.9437	10.5311	12.5894	8.651	7.5744	12.2732	10.2189
HF1357	912	1	12.0284	6.8089	10.6968	8.6093	6.8399	6.4387	5.1842	4.9469	6.6716	6.5834	5.8313	7.7872	6.4594	8.0055	6.7061	10.0279	7.396	7.6121	8.2261	7.9876	8.6201	9.164	7.3864	6.2494	9.5991	7.6319	8.9879	8.4997	7.4663	7.88	11.6876	6.7014	5.5739	5.9771	6.3968	6.7592	6.9214	9.064	7.3665	7.7502	9.0491	9.9744	12.5247	9.0513	7.4833	11.7274	8.2683
E09471	804	1	11.9964	5.9615	10.7251	8.2776	6.8528	6.5809	5.0704	4.8404	6.7924	6.3627	5.8393	8.674	6.5013	7.527	6.0853	10.6225	7.662	7.5918	8.3181	7.4166	9.4953	7.9977	7.7123	5.0927	9.7498	7.1194	9.421	9.9776	7.3867	8.2303	12.2952	6.8071	5.9257	6.0512	7.1477	6.1926	6.8325	9.3405	8.2047	7.4936	8.8876	10.1604	12.5187	9.2308	6.973	12.2963	8.6161
HF0251	672	1	12.8222	7.2039	10.8826	7.1267	6.6478	6.1004	5.0891	5.7371	6.5806	6.0606	5.3957	8.3364	6.4132	7.5184	5.9741	10.6766	7.1858	7.9014	10.051	7.3592	9.6128	9.0742	7.5703	5.0265	9.2435	6.4769	9.2344	9.8686	7.8603	8.2336	11.6711	6.5735	5.7515	5.6001	6.212	6.0386	6.4139	9.5223	8.2233	8.1031	8.9684	9.7679	12.0786	8.8262	7.4549	12.0888	7.3358
HF0223	1275	1	12.2824	5.8983	10.5005	7.7502	7.0218	6.3466	5.6195	4.8693	6.9918	6.6379	5.9942	8.3112	6.1988	7.11	6.5526	10.2841	6.9832	7.7109	8.2243	7.7506	8.9605	8.7194	8.2468	5.2495	9.5874	6.9879	9.0281	8.7432	7.2866	8.3445	11.7009	6.9331	5.9377	6.123	6.6949	6.6545	6.9995	8.6826	7.5644	7.4781	8.9219	9.817	12.7049	8.9286	7.009	11.3294	9.4853
E09688	1503	1	11.7382	6.4721	10.7909	7.5903	6.5672	6.0962	5.1193	4.9339	6.6609	6.1271	5.6821	8.1444	6.3998	7.652	6.2575	10.3245	7.1725	7.6909	8.8377	7.4811	9.3436	9.3134	7.9161	5.8551	10.4134	6.5199	9.1312	8.1418	7.9536	8.4893	12.0138	6.6837	5.5141	6.0242	7.1874	6.1806	6.8024	9.1696	7.7814	7.7029	9.402	10.3857	12.8474	9.947	7.1506	11.9263	8.8216
HF0936	150	1	12.0364	6.8458	10.701	7.7237	6.6841	6.4875	5.1153	5.3595	6.6463	6.2326	5.7275	8.3349	6.2234	7.9597	6.2842	10.3485	7.5589	7.6202	8.6538	7.5802	8.9922	8.179	7.8116	5.3559	9.9482	7.0718	9.119	11.0124	7.7514	8.3835	11.9852	6.6576	5.6553	5.8788	6.7906	6.3672	6.7706	8.9369	7.7275	7.2477	9.0693	10.0464	12.2539	9.7277	7.4318	12.5204	8.4714
HF0914	4344	0	13.1548	5.9559	10.7815	7.2081	6.8379	6.9116	5.3395	4.9929	6.6656	6.4151	6.1411	7.9957	6.3369	7.93	6.1445	10.4413	7.3596	7.5449	8.887	7.626	8.7418	8.348	7.6991	4.683	8.3573	6.1942	9.3547	8.3166	7.301	7.9823	12.0815	6.7239	5.5758	6.0409	6.6963	6.7282	6.9567	9.0833	7.8813	7.5099	8.7026	8.9476	12.1759	8.058	6.9595	11.4281	8.9475
E09966	525	1	12.501	6.7284	10.87	7.3786	6.6228	6.7209	5.1803	4.7643	6.625	6.2709	5.4935	8.18	6.6859	7.9003	5.7947	10.8393	6.7685	7.9686	9.2568	7.2927	9.3661	7.4227	8.4135	4.9526	8.1524	7.0986	9.6446	8.5494	7.7532	8.0295	11.3088	6.589	5.4724	5.9999	6.5391	6.0279	6.6719	9.4912	8.0946	7.7796	9.2486	10.1163	13.0124	7.9757	7.3254	11.6756	11.461
HF1490	117	1	12.6095	6.714	10.9891	7.9447	6.7934	6.4149	5.0706	5.6573	6.6958	5.9587	5.4232	8.4825	6.6921	7.9955	5.7792	11.0274	6.8521	8.2333	9.1799	7.2146	9.1999	8.3017	7.6348	4.9193	8.5599	7.0748	10.0331	8.7153	7.8357	8.1562	11.3637	6.561	5.5989	5.7519	6.1044	6.2911	6.6807	7.1813	8.0876	8.2501	9.6245	10.5649	13.0922	8.6282	7.4534	12.0362	10.7648
900_00_5382	474	1	11.9985	6.4825	10.9397	8.507	6.962	6.1809	5.2653	4.7665	6.8819	6.5369	5.8549	8.0276	6.64	7.9661	7.4283	9.7946	7.0878	7.9465	8.3585	7.6341	9.2678	8.9251	7.7416	6.4604	10.0806	7.7753	9.1748	7.5974	7.1471	7.8618	11.7144	6.8864	6.0151	5.9731	6.917	6.6969	6.8843	9.0416	7.5241	8.0592	9.1895	10.6796	12.9095	9.0729	7.3118	10.4875	8.3837
E09661	1434	0	12.3588	6.2151	10.395	8.3151	6.5717	6.6615	5.0756	4.9008	6.6085	6.2221	5.6337	8.6312	6.4164	7.191	6.1302	10.7937	8.3054	7.6873	8.9852	7.4612	8.8354	8.86	8.0667	4.9663	8.9876	7.8885	9.4572	9.7444	7.5579	9.0479	12.6719	6.7476	5.4671	5.7319	6.9411	6.2711	6.7401	9.0508	8.1908	7.5246	8.8633	9.6432	12.5202	8.4933	7.2525	12.4217	7.8723
MD552910	810	1	12.4498	6.2668	10.2846	7.3769	6.5092	6.1771	5.1716	5.3239	6.5567	6.1952	5.6051	7.7962	6.4152	7.6875	5.9582	10.7363	5.9222	8.2444	9.3409	7.5984	9.0068	8.0458	7.8262	4.9209	8.545	6.1593	10.1112	8.2975	8.088	8.1725	11.5905	6.597	5.637	5.7723	6.079	6.212	6.8478	9.3774	7.8323	8.1659	9.2862	9.8559	12.572	8.0573	7.3532	11.1386	11.5847
HF1511	1674	1	12.1735	6.1883	10.993	7.8313	6.6835	6.0207	4.9203	4.6594	6.5745	6.1093	5.6677	8.4865	6.2621	7.9033	6.0789	10.3115	7.3308	7.7842	8.8888	7.631	9.5053	8.4205	7.4957	5.5666	10.256	6.7829	9.2079	8.0572	7.5304	8.1531	11.9816	6.7925	5.6929	5.9569	6.162	6.2342	6.687	9.3819	7.8334	7.6946	9.2661	10.6536	12.8114	9.8236	7.2228	11.8393	8.6172
HF0291	2796	1	12.5675	6.3808	11.0796	8.0657	6.8688	5.887	5.1345	4.7275	6.6528	6.146	5.684	8.3295	6.4557	7.9235	6.0351	10.1605	7.5355	7.8498	8.2042	7.3723	9.289	9.623	7.7004	5.0096	9.2555	6.3712	9.8165	8.4658	7.9794	8.2909	12.546	6.6566	5.561	5.9383	6.36	6.1194	6.7866	9.3036	7.9829	7.7089	8.9966	9.5187	13.0935	8.7305	7.3482	11.6918	8.8376
HF1280	465	1	13.0117	6.9817	11.0925	8.3314	6.8394	6.3063	5.336	5.3852	6.7348	6.079	5.649	9.4267	6.4122	7.1481	6.2751	11.3448	6.8285	7.9238	9.7769	7.3026	9.0459	7.2336	8.0808	4.7681	8.8222	7.7635	9.9049	10.1554	8.4296	8.2226	11.6046	6.733	5.5384	5.821	7.3461	6.2633	6.9935	8.9341	8.1679	7.9047	9.7364	9.8479	12.0849	8.5746	7.0579	13.1384	9.132
HF0244	222	1	11.8722	6.1949	10.8362	7.7169	6.9863	6.45	5.1891	4.7801	6.8661	6.3464	5.7441	7.9192	6.4412	7.0797	6.2599	9.9324	6.6016	7.6906	8.5598	7.9145	9.0202	7.7481	8.3758	5.5502	9.858	6.4637	9.0439	8.2443	7.2646	7.8314	11.252	6.6839	5.6133	5.9761	6.1414	6.2859	6.6474	8.8304	7.6992	7.6131	8.9622	9.9353	12.0204	9.1053	7.0901	11.0518	10.3734
HF0982	450	1	12.4036	6.823	10.8946	7.5587	6.7655	6.3997	5.0923	5.2939	6.5952	6.2092	5.5604	8.0927	6.3545	7.2886	5.9473	10.6716	7.0037	7.8082	9.4047	7.5001	8.875	8.1944	7.8511	4.8947	8.9363	7.2898	9.3038	9.9276	7.5343	8.1857	11.7181	6.5716	5.5268	5.9878	6.2401	6.195	6.7511	9.7795	7.925	7.7733	9.0839	9.4931	12.018	8.3857	7.4198	12.2186	10.4204
HF1057	726	1	12.1105	6.4497	10.9173	7.5982	6.8896	6.4257	5.1973	5.2031	6.8526	6.2209	5.6108	8.1563	6.4942	6.7877	6.1954	10.6396	6.776	8.084	9.1125	7.4478	9.2963	7.6519	7.6332	5.0549	8.8929	6.4726	9.6453	8.4583	6.7046	7.9655	11.0346	6.5798	5.6617	5.9546	6.2879	6.4677	6.8571	9.1471	7.5894	7.8363	9.0414	9.8407	12.1072	8.5062	7.4496	11.4888	11.4267
HF1581	6	1	12.2346	6.1751	10.8369	8.0839	6.8362	6.1302	4.9833	4.8504	6.8741	6.2389	5.4708	8.6107	6.8529	7.2746	5.7685	11.0764	6.8831	7.7011	8.8975	7.2966	9.4524	8.3131	7.638	5.217	9.5789	7.0241	9.5958	8.127	7.195	8.2814	11.5388	6.7153	5.7219	5.7405	6.2698	6.2775	6.9895	9.5194	7.9971	7.7471	9.177	10.357	13.2494	9.0293	7.0403	11.5363	9.3558
HF1487	294	1	12.51	6.308	10.8992	7.9687	6.7667	6.3423	4.9576	4.9927	6.6133	6.1753	5.6196	8.1174	6.3341	7.6194	6.0134	10.817	7.5544	7.9343	9.1235	7.2053	9.2829	8.7213	7.7626	4.8268	8.8718	7.1831	9.9117	8.6709	7.8262	8.2271	12.1254	6.701	5.5731	5.9467	6.391	6.1617	6.6197	9.4327	8.3491	7.7077	9.2525	9.7461	13.0323	8.4625	7.0483	11.932	9.1217
HF1185	2817	0	12.9027	6.5583	10.7313	7.9969	6.7314	6.1132	5.078	6.2276	6.6878	6.2041	5.6822	7.5638	6.3284	7.1375	6.302	10.7387	6.7806	7.6825	8.8154	7.7501	8.7192	8.4474	7.9923	4.9082	8.3001	6.6645	9.1005	7.9555	7.6216	7.7408	11.75	6.7026	5.6213	5.8373	6.317	6.3279	6.8748	9.4657	7.5607	7.3254	8.9254	9.0393	11.7807	7.7765	7.1053	11.4128	9.2582
HF1568	1260	1	12.3086	6.8116	10.4481	7.836	6.7462	6.0057	5.1379	4.6662	6.7617	6.3655	5.5598	8.0969	6.2474	7.8453	5.9489	10.4159	7.6699	7.9381	8.96	7.4506	9.2683	8.3699	7.7116	4.7513	8.3348	6.8875	9.6277	8.2934	7.4005	7.9128	11.8525	6.6505	5.5294	5.9189	6.1653	6.1193	6.8202	9.2743	7.964	7.8922	9.0143	9.1483	12.8031	8.8537	6.8766	11.3549	8.7931
HF0726	2643	0	12.0245	5.9543	10.7537	7.2569	6.6832	6.2772	5.5629	4.8739	6.7655	6.3402	5.6856	8.5132	6.5331	7.1738	6.1622	9.7108	7.5405	7.7154	8.0484	7.6555	9.4707	9.1629	7.5934	4.9662	8.8291	6.154	9.6749	8.2885	7.2515	8.1513	11.9005	6.5622	5.5662	5.9865	6.3275	6.3085	6.722	9.121	7.6669	7.8377	8.8812	9.5772	12.7065	8.4889	7.2557	11.1473	8.9738
HF1246	6	1	12.3313	6.1576	10.5051	8.1143	6.8698	6.962	5.1155	5.1148	6.9399	6.2613	5.7919	8.6558	6.6855	7.2896	6.5964	10.3383	8.2339	7.6641	8.9104	7.7721	8.7922	7.8166	8.4385	5.2476	9.6539	8.2593	8.8236	10.7351	7.8209	8.2352	12.2475	6.7992	5.8148	6.3379	7.6484	6.5201	6.8157	9.1622	7.9164	7.3858	9.0145	9.8333	12.336	9.5386	7.4093	12.639	8.4378
HF0966	4074	0	12.872	6.9118	11.0408	7.9944	6.7185	6.6297	5.0282	4.8906	6.6897	6.1727	5.6979	7.8436	6.263	8.187	5.8699	11.8499	7.8166	7.9218	9.2818	7.4587	9.2478	8.482	7.2947	4.826	8.7424	7.1242	10.0025	8.6654	7.9263	7.7388	12.5468	6.4798	5.4889	5.6415	6.1415	6.397	6.8467	9.1601	8.1278	8.0312	8.9607	9.0147	12.7383	8.492	7.0123	11.8625	8.6755
HF1613	1977	1	12.8611	6.6742	11.3975	7.1716	6.7405	5.7647	5.2258	4.6907	6.6083	6.2115	5.5112	8.248	6.495	8.0225	5.9932	9.9439	7.3982	8.1247	8.4694	7.0436	9.1487	9.75	7.7704	5.0258	9.2195	5.8594	9.9602	7.8776	7.8797	8.1551	12.4644	6.8022	5.9284	5.8469	6.2125	6.1	6.8592	9.5906	7.9671	7.8621	9.2916	10.1073	12.98	9.0589	7.1272	11.839	9.0745
MD549279	5616	0	12.5669	6.2201	11.1851	7.7992	6.6789	5.9097	5.3069	4.9378	6.5855	6.1796	5.6369	7.7591	6.301	7.8161	6.0209	9.8292	7.7657	7.8541	8.5642	7.6132	8.86	9.6121	7.2505	5.022	9.0674	6.387	9.8132	7.9016	7.8141	8.1081	12.24	6.595	5.9267	5.9887	6.2712	6.4217	6.8127	9.404	7.9434	7.7156	8.9921	9.4275	12.7514	8.9373	7.3537	11.4938	9.0066
HF1227	7446	0	12.0891	7.1668	10.8792	7.0678	6.6642	6.2122	5.1531	5.126	6.6278	6.1208	5.6035	8.1998	6.2829	7.9091	6.1832	10.4877	7.2356	7.6155	9.2102	7.5954	9.4012	8.3678	7.4541	5.512	9.9854	6.0579	9.3818	8.3002	7.844	8.0426	11.6934	6.6201	5.5321	5.8811	6.2468	6.4655	6.8299	9.2734	7.859	7.6739	9.3299	9.922	12.3515	9.7348	7.4121	11.6745	8.865
HF0599	1266	1	11.1112	6.1533	10.603	7.5343	7.052	6.2307	5.1606	4.9286	7.0926	6.5198	5.9153	7.9231	6.2689	7.3755	6.5911	9.2209	7.9022	7.6032	8.175	7.8209	8.6295	8.2868	7.7312	5.6558	10.6481	6.2849	8.966	7.767	7.8398	8.0351	11.4474	6.6826	5.903	6.4965	6.4798	6.6834	6.9334	8.8504	7.6742	7.6055	8.9921	10.1662	12.1819	9.7296	7.4398	10.6229	8.8358
HF1494	1008	1	12.8582	6.5156	10.3281	7.5501	6.8661	6.749	5.3431	5.1132	6.7736	6.4135	5.6623	8.7304	6.6592	7.0275	6.338	10.2033	7.4265	7.9088	9.2665	7.6904	8.3718	8.3502	8.0756	4.9695	8.1259	7.1294	9.5312	10.6556	7.2224	8.2766	11.9636	6.801	5.872	6.135	6.4747	6.4641	6.794	8.6895	7.5233	7.7436	8.9055	9.1022	11.7139	8.0328	7.3574	11.4904	9.431
HF0152	3891	0	12.2644	6.9167	10.8355	7.838	6.6346	6.0008	5.1436	4.6957	6.6007	6.0247	5.6425	8.2569	6.5084	8.2486	5.9015	10.586	7.7688	7.7399	9.0632	7.3877	9.123	8.0865	7.6402	5.3015	9.9846	7.206	9.5928	8.723	7.7904	8.5991	12.2356	6.6014	5.6536	5.9214	6.1969	6.2549	6.7004	9.319	7.9738	7.6791	9.3775	10.0663	13.1711	9.6125	7.2109	11.2998	8.828
HF1156	3114	0	12.6897	6.0145	11.0733	7.6838	6.759	6.221	5.2001	4.7387	6.8082	6.3895	5.7245	8.1476	6.3897	7.6053	6.1401	10.2469	7.663	7.6955	8.2114	7.3656	9.0054	9.4935	7.8275	4.8366	8.7123	6.1963	9.8632	7.8667	7.6493	8.2292	12.2739	6.62	5.75	5.9809	6.4163	6.2531	6.7677	9.1207	8.0315	7.4222	8.7342	9.8852	12.3396	8.5991	7.2456	11.0768	9.746
E09448	6777	1	12.6987	6.4365	11.0418	7.5234	6.8515	5.9387	5.1112	5.3096	6.745	6.396	5.7531	8.0162	6.6267	7.214	6.3297	9.5828	7.3711	7.8043	8.7296	7.7151	9.2578	9.6286	7.697	5.0512	9.4834	5.9208	9.5635	8.0641	7.8268	7.86	11.6951	6.443	5.6404	5.8034	6.2027	6.1247	6.7263	9.0091	7.8784	7.8952	8.916	9.8554	11.9984	8.0831	7.4017	11.7477	7.6519
HF1345	2469	0	13.1517	6.812	10.8612	8.1145	6.742	6.4283	5.0576	5.2856	6.7815	6.1771	5.4039	8.6014	6.6421	7.8023	6.0668	10.4467	6.523	8.0203	8.5442	7.1139	9.5327	8.846	7.7806	5.1468	9.5112	7.3806	10.548	8.945	8.1643	8.3042	12.4928	6.7414	5.706	5.9355	6.2107	6.246	6.6692	9.3745	8.3454	8.138	9.3728	10.6333	12.9995	8.9046	7.0491	12.3237	7.7928
HF1167	528	1	11.6727	5.0858	10.9904	8.9902	7.0246	6.6704	5.1736	4.9193	6.7301	6.5339	5.8602	8.867	6.3322	6.9685	6.1361	10.3859	7.4365	7.8248	8.1085	7.7987	9.079	9.0005	7.8848	4.8069	8.8809	6.887	9.3663	8.26	6.8478	8.0298	11.3006	6.846	5.5375	6.0892	6.482	6.6688	6.7461	8.9673	7.6081	7.5954	8.6732	10.1179	11.6861	8.3485	7.2972	11.7459	8.855
E09239	1872	1	12.1666	6.344	10.567	7.7891	6.7644	6.6687	5.3266	5.5141	6.7736	6.32	5.7053	8.6546	6.2216	6.932	6.2383	10.7092	7.4618	8.0631	8.9244	7.5569	9.0997	8.4971	8.155	4.8682	8.4785	7.5182	9.7211	10.419	7.6266	8.4481	11.7642	6.6118	5.5818	6.0925	6.6867	6.3766	6.7824	9.1733	7.8919	7.6479	9.0884	9.7915	12.0377	8.1225	7.2281	12.4534	8.5558
900_00_5550	177	1	12.5715	6.8345	10.5874	7.4588	6.6232	6.0044	5.2585	5.1641	6.6249	6.1221	5.6266	8.3373	6.6041	7.022	5.9892	10.4826	7.9495	7.8954	9.2359	7.4444	9.4737	9.7839	7.6395	5.1803	10.1068	6.1266	9.5396	8.4736	7.8508	8.1545	12.4916	6.7659	5.8468	6.029	6.1171	6.1887	6.5999	9.3088	8.1571	7.3137	9.4879	10.2193	13.3516	9.4542	7.0508	11.6412	9.2419
E09334	2520	1	11.8211	5.8865	10.304	8.1779	6.6822	6.6104	5.1602	5.1743	6.6841	6.3729	5.7991	8.5295	6.5	6.7237	6.146	10.707	7.6195	7.7755	9.0832	7.5332	9.0381	8.1477	7.9462	4.7905	8.7094	7.5379	9.4466	10.7103	7.4928	8.5475	12.1155	6.7171	5.6115	5.8068	6.9569	6.5944	6.7597	9.2739	7.99	7.3677	9.0019	10.0151	12.4101	8.2949	7.1323	12.5859	8.5952
HF0184	354	1	12.7561	6.6719	10.8179	7.7636	6.9474	6.4863	5.1753	5.8039	6.784	6.3319	5.6925	8.2677	6.5541	7.3233	5.849	10.7573	6.5875	8.109	9.1302	7.6308	9.224	7.367	7.6074	5.1803	8.032	6.3154	10.0778	8.5033	7.1828	8.1438	10.9663	6.8133	5.7503	5.9154	6.2128	6.2046	6.7312	9.4887	7.9308	8.454	9.2688	9.9358	12.3325	7.9364	7.2048	11.8647	11.1719
HF0606	2271	1	12.6025	6.6821	11.3798	7.1345	6.729	6.5934	5.1748	4.8302	6.6607	6.2416	5.4542	8.0615	6.4179	9.3844	5.8756	11.2358	7.9516	8.071	9.1249	7.6641	7.8474	8.9023	7.948	4.7603	8.2715	7.828	9.2683	9.4661	7.5765	7.8896	12.3426	6.5478	5.4771	6.1425	6.6465	6.286	6.7205	9.3731	7.8186	7.7732	8.9389	9.3018	12.8021	8.8039	7.351	12.4661	8.6142
HF0510	579	1	12.6139	6.5934	10.6995	8.0335	6.6496	6.1722	5.3383	5.7755	6.7878	6.0736	5.5815	9.486	6.483	7.2727	5.6377	11.0461	6.7803	7.8521	9.6964	7.1331	9.6558	8.2585	8.1161	4.8671	9.1807	7.1161	9.8719	10.9737	8.3517	8.3385	11.4688	6.4848	5.6134	5.7588	6.4671	5.9436	6.7251	9.3123	8.1091	7.5988	9.4437	9.8963	12.5107	8.433	7.2444	12.2137	9.6468
HF1489	2019	1	12.8444	6.3802	11.0724	7.2546	6.7713	5.9421	5.1966	4.899	6.7554	6.2711	5.7466	7.7017	6.2847	8.39	6.2092	10.1103	7.3789	8.0143	8.9036	7.6408	8.7591	8.665	7.5931	5.1195	9.084	5.6738	9.5608	7.2625	7.6287	8.0514	12.2191	6.7384	6.0889	6.1089	6.2981	6.3978	6.7044	9.2464	7.6949	7.6411	9.0285	9.5179	12.4833	8.9878	7.1029	10.9014	10.0086
HF0285	426	1	11.1925	6.5129	10.9266	7.8017	6.7552	6.0762	5.2144	4.7458	6.7665	6.3796	5.9098	8.5806	6.4909	7.4885	6.314	10.1384	7.6964	7.4992	8.3329	7.4278	9.3761	8.3386	7.6732	5.9197	10.8276	6.4838	9.54	7.4813	7.5419	8.1863	11.893	6.775	5.9185	6.0639	6.3886	6.6102	6.9344	9.1799	8.0555	7.7572	8.9099	10.5491	12.8289	9.9234	7.3657	11.164	8.2063
HF0931	3519	0	12.6694	6.2706	10.7223	7.47	6.7396	6.2975	5.5933	4.8669	6.7959	6.4458	5.6728	7.5324	6.2935	7.8491	6.084	10.6171	7.4629	7.767	9.2361	7.5607	9.0269	7.5933	7.3839	4.7393	8.0637	6.3232	9.6999	7.9126	7.5876	7.7232	12.1668	6.5774	5.701	5.9032	6.1619	6.5734	6.9489	9.3309	7.6978	7.8285	8.9079	9.2516	12.5212	8.3468	7.0027	10.6992	8.4705
900_00_5476	267	1	12.5042	6.2085	10.94	7.5441	6.9042	6.4047	4.953	4.8445	6.8649	6.3852	5.9217	8.1232	7.1145	7.4164	6.1516	9.6061	7.4923	8.0291	8.4117	7.5337	9.216	9.6559	7.927	5.1748	8.6369	6.1817	9.8145	8.597	7.6513	7.9256	12.4825	6.5914	5.935	5.9772	6.5326	6.3107	6.925	8.8839	7.8192	7.6469	9.3053	9.4468	12.811	8.1369	7.0186	11.3072	9.1367
E09988	1911	1	13.3103	6.8989	11.4277	7.5436	6.7162	6.0538	5.0392	5.5683	6.7239	6.2855	5.4536	8.3778	6.4845	7.2173	6.06	10.6669	6.9224	7.9115	9.3867	7.4378	9.7981	8.4322	8.5032	4.9707	8.5579	5.7971	9.5644	8.9994	7.8831	8.2601	11.9023	6.5855	5.8936	5.8313	6.322	6.1321	6.7485	9.0223	7.9239	7.7983	9.1918	9.0864	11.512	7.445	7.3358	11.5237	8.5939
HF0835	1341	1	12.2687	6.2438	10.8711	7.5944	6.8327	6.3451	5.1094	4.8183	6.8988	6.359	5.5373	7.7666	6.4374	7.8372	6.1506	10.4208	7.4814	7.8427	9.1046	7.6602	8.7404	8.8829	7.716	4.963	8.7626	6.3015	9.4729	8.0562	7.6892	7.9645	11.976	6.4959	5.706	6.0699	6.3388	6.4932	6.6624	9.0488	7.7304	7.5577	8.9702	9.3892	12.5084	8.6924	7.0643	11.2065	9.3743
HF0920	30	1	13.0197	5.9459	10.6774	7.3821	6.8007	5.9868	5.203	4.9587	6.7711	6.4948	5.6999	7.5829	6.3566	8.0781	6.1288	8.9238	7.28	8.1358	7.9087	8.0299	9.0637	8.1566	7.2243	5.0109	8.2331	5.8736	9.8861	7.1917	7.4583	7.6781	11.7646	6.6074	6.5278	6.0434	6.5375	6.6692	6.8039	9.0807	7.7742	7.7807	8.6684	8.7269	12.2427	8.1693	7.2524	10.1374	9.951
HF1235	2910	0	12.3522	5.991	11.0344	7.3844	6.6729	6.2479	5.228	4.8982	6.8061	6.3829	5.8883	7.7055	6.3671	7.5097	6.351	9.4069	7.7056	8.1444	8.2202	7.6541	8.7207	9.9577	7.5131	4.9302	8.7912	5.6511	9.6793	7.5158	7.5357	7.8747	11.9596	6.5464	5.6489	5.9113	6.1954	6.5377	6.8678	9.1992	7.7168	7.6193	9.1429	9.7161	12.5102	8.7844	7.1133	10.8181	9.9576
HF0899	1974	1	12.2368	6.6075	10.812	7.4675	6.9153	6.3837	5.2288	4.8558	6.8225	6.4706	5.5604	7.5156	6.5004	7.4648	6.1149	10.283	7.5416	7.7558	9.1725	7.6898	8.6035	8.5909	7.7209	5.1479	9.1202	6.5343	9.3372	7.8698	7.4483	7.9321	11.8648	6.6846	5.792	6.2977	6.212	6.7216	6.6587	8.9954	7.7209	7.43	9.0413	9.3977	12.5555	8.9959	7.3353	11.4031	9.7086
HF1286	390	1	12.7247	6.3149	10.9347	7.9408	6.6759	6.5172	5.0514	5.2774	6.6535	6.0779	5.6603	8.8397	6.49	7.5702	5.9144	11.0058	6.9913	8.004	9.2409	7.2115	9.6919	8.5323	8.4429	4.9852	8.3999	7.5664	9.7815	9.6207	6.9816	8.7069	11.2969	6.64	5.6696	5.7838	6.6245	6.0395	6.8101	8.6685	7.8689	8.1721	9.2017	10.3872	12.6907	8.0704	7.5006	12.4704	9.3959
HF0450	873	1	12.4632	6.3739	10.1819	7.8302	6.5587	6.4225	5.1304	5.2795	6.6453	6.1527	5.6069	8.7963	6.2556	7.5904	5.8366	11.2529	7.4906	8.124	9.1857	7.3432	8.9493	8.4638	7.882	4.7466	8.5109	7.8069	9.9055	10.4459	7.7661	8.5683	12.1289	6.5429	5.5478	5.6604	6.608	6.2272	6.567	9.4017	8.1487	7.6707	9.2138	9.6873	12.7134	8.9948	7.3154	12.5515	8.423
HF0305	1455	1	12.6244	5.2803	10.8333	8.4519	7.0683	6.45	5.3881	4.9472	6.9776	6.3988	5.8323	8.1657	6.5316	7.0657	6.5287	9.4517	6.8933	8.0547	8.5328	7.575	8.7988	7.3685	7.8708	5.0872	8.4348	6.2064	9.7142	8.813	7.3028	8.2552	11.8474	6.75	5.8904	6.3618	6.3707	6.6475	6.7963	9.2437	7.5018	7.9583	8.8856	9.8054	12.6318	8.684	6.9394	11.1072	9.1466
900_00_5385	384	1	12.1715	6.4219	10.9375	7.8537	6.6381	5.9188	5.169	5.0139	6.6675	6.2232	5.6437	8.1528	6.6066	7.3332	5.8383	10.9716	6.7818	8.0518	9.2636	7.5642	8.945	8.867	7.3958	4.9373	8.0933	6.2328	9.5964	8.0875	7.7808	8.2735	11.4149	6.7581	5.4636	5.9765	6.2156	6.3137	6.6534	9.0894	7.8842	7.8238	9.4978	10.1931	12.7443	8.2347	6.847	11.7773	11.0458
900_00_5345	474	1	12.5108	5.772	11.0122	7.6606	6.7493	6.2801	5.246	4.9546	6.7284	6.3856	5.5681	8.2983	6.271	7.2092	6.2172	9.718	7.482	8.0502	8.4273	7.588	9.2412	9.7576	7.8319	4.9941	8.5358	6.2042	9.9308	8.4605	7.6204	8.1088	12.2543	6.7873	5.8078	5.9993	6.2841	6.4346	6.6929	9.3247	7.9545	7.7762	9.0748	9.7507	12.8152	8.5475	6.8911	11.122	8.9559
HF1381	4029	0	12.3208	6.6643	10.7204	8.0279	6.6079	6.1775	5.3078	4.7069	6.6673	6.1673	5.5928	8.0607	6.4913	7.6597	5.9904	10.9236	7.4003	8.0116	8.6872	7.4795	9.019	8.2402	7.9438	4.8926	8.0884	7.1994	9.6736	8.6939	7.8476	8.0096	12.3049	6.6022	5.6439	5.731	6.7799	6.1073	6.8158	9.321	7.9591	7.5522	9.0075	9.3169	12.9581	8.7773	7.099	11.4767	8.6713
HF1677	1878	0	12.26	6.2907	10.7824	7.4121	6.8252	6.007	5.2439	4.9928	6.8114	6.3334	5.7535	7.6157	6.2834	7.8766	6.3441	9.5206	7.8988	7.7504	8.3254	7.717	8.6117	9.6212	7.6758	5.088	9.2478	6.0858	9.5456	7.7797	7.6264	8.0216	12.0656	6.5457	5.688	6.0039	6.3779	6.4947	6.7886	8.5591	8.0178	7.2313	8.9086	9.7273	12.5735	9.2453	7.2829	11.0388	9.9497
900_00_5459	297	1	12.6889	6.3567	11.3121	7.6237	6.5306	6.3246	5.2292	4.8693	6.7721	6.2294	5.7136	8.1525	6.4735	8.0851	6.0784	10.4139	8.0202	8.1191	8.9976	7.5338	9.1543	8.0106	7.9707	5.0645	8.4487	7.364	9.6258	8.7671	7.545	8.2733	12.2617	6.655	5.6294	6.0857	6.9104	6.2989	6.8323	9.7978	7.75	7.8908	9.0865	9.5515	12.9221	8.689	6.8186	11.4761	8.8549
HF1295	564	1	12.2527	6.0861	10.3407	7.458	6.8554	6.5203	5.256	4.8684	6.7873	6.4843	5.7291	7.6899	6.2637	7.3344	6.1889	10.831	7.3954	7.7181	9.4586	7.6112	8.9108	9.1104	7.7377	4.7916	8.7701	6.8069	9.3729	8.5205	7.46	7.8928	12.1049	6.6402	5.7674	6.1427	6.1954	6.2543	6.8161	9.0489	8.0918	7.5527	8.7397	9.205	12.3734	8.6854	7.3017	11.4648	8.6738
900_00_5545	177	1	12.2539	6.1432	11.1001	8.3414	6.6871	6.1179	5.5147	4.9284	6.6952	6.2663	5.8199	7.9456	6.382	7.2647	6.1604	10.7042	6.6786	8.0634	9.1119	7.4864	9.1203	7.841	7.5964	4.8291	8.2797	6.1731	10.0318	8.1413	7.5168	8.4154	11.9128	6.6888	5.8912	5.8415	6.3781	6.4275	6.8794	9.5759	7.6295	8.043	9.2649	9.8323	12.7643	7.6394	7.031	11.6293	10.0431
HF0435	3267	0	12.6496	5.8174	10.4806	7.6623	6.7288	5.9913	5.0992	5.3622	6.6498	6.1636	5.7135	8.1407	6.2645	7.4419	5.8841	10.7956	7.0437	7.6459	9.2174	7.5689	8.5138	8.894	7.6458	4.8573	8.3392	6.9226	9.3928	8.8006	7.5738	8.3377	11.6104	6.6165	5.6009	5.8996	6.2173	6.314	7.0606	9.0528	8.0755	7.8127	9.0681	10.1295	12.6336	8.386	7.674	11.9881	8.5017
HF1232	597	1	11.7699	5.8618	10.3872	8.1252	6.7164	6.4698	5.2297	4.8003	6.7912	6.4107	5.7585	8.4255	6.3836	6.8972	6.1482	10.7192	7.383	7.563	8.8491	7.6129	9.1335	8.2677	7.618	4.8798	8.8101	6.7709	9.2878	8.7515	7.0106	8.1523	11.6181	6.7847	5.5269	6.0585	6.2432	6.3322	6.8003	9.3734	7.8925	7.1749	8.972	9.9304	12.3666	8.2598	7.2823	11.6553	10.452
E09673	6324	0	12.4301	6.1775	10.6722	7.6888	6.7877	6.9941	5.1621	4.9118	6.8511	6.5083	5.8919	8.7681	6.9647	7.6072	6.4626	10.6179	7.6446	7.7084	8.6996	7.3695	9.0311	8.2119	8.2054	5.2991	9.1261	8.1927	9.3854	9.318	7.2752	7.9658	12.3457	6.8085	5.8616	5.8815	6.9276	6.1965	7.0902	8.9011	7.7048	7.205	9.1233	9.5015	12.6156	8.7761	7.0157	12.3955	9.0241
HF0802	2604	0	12.6664	6.3965	10.7394	7.9549	6.7577	6.1243	5.1972	4.6784	6.7881	6.2542	5.9155	7.7752	6.2796	7.7873	6.1631	10.4232	7.4855	7.8276	8.7042	7.5902	8.6306	9.5882	8.0509	5.1021	9.1841	6.7404	9.3309	8.5579	7.4353	8.1205	11.9647	6.6173	5.8116	6.0314	6.2104	6.3041	6.9489	9.2064	7.8142	7.8151	8.7449	9.5922	12.9649	9.1064	7.2458	11.4189	9.1648
HF0855	405	1	12.6193	6.0545	10.5932	7.5646	6.8558	6.2207	5.1578	5.622	6.7502	6.3031	5.6367	7.7671	6.3607	7.1261	5.9405	10.5814	7.3515	7.7257	9.6189	7.5414	8.6442	8.6735	7.8049	4.8554	8.3081	7.0535	9.3108	9.0894	7.6281	8.0112	11.6022	6.6023	5.5705	6.0461	6.6558	6.3186	6.5972	9.5108	7.9257	7.7072	9.0341	9.2127	12.4159	8.1803	7.4982	11.5968	8.9674
HF0844	1887	1	12.9778	6.9966	10.519	7.729	6.8509	6.5122	5.1106	5.1552	6.7446	6.1239	5.5816	8.1595	6.4238	7.2508	6.1752	11.1161	7.5222	9.587	9.5201	7.7492	7.7633	8.0828	7.6376	4.8239	8.5882	7.2493	9.7536	9.4613	8.1458	8.1549	12.0584	6.8157	5.4942	5.8002	6.3978	6.1185	6.8517	9.1399	7.7794	7.6173	9.1879	8.8879	12.405	10.3371	7.1377	11.6975	8.6022
E09394	1527	1	12.8345	7.1394	11.2513	7.4833	6.9092	6.1805	5.0564	4.7521	6.7031	6.3052	5.5499	7.6634	6.6668	8.3648	6.1449	10.4676	7.561	8.2466	9.2806	7.3906	9.1639	8.2316	7.8452	5.1086	9.0719	5.7646	9.8799	7.9127	7.0817	8.3327	12.2044	6.5819	5.6488	5.8186	6.2403	6.2233	6.7796	9.6266	8.0001	7.8293	9.0613	8.8158	12.8013	9.278	7.2264	11.5458	9.3077
HF0953	1317	1	12.8472	5.6833	10.6974	8.1463	6.6993	7.0402	5.1814	4.9427	6.7903	6.2826	5.573	8.9811	6.9502	7.1022	6.3036	10.3739	7.6691	7.8953	8.8232	7.1859	8.5596	7.7517	8.0666	4.9431	8.7031	7.9807	9.2078	12.2439	7.1269	8.8757	12.5794	6.8796	6.1688	6.014	6.7771	6.5637	6.6063	9.3477	7.7567	7.551	9.3138	9.9223	12.4103	8.9393	7.2425	12.7836	8.4684
900_00_5308	504	1	12.4811	6.5043	10.8768	7.8857	6.7479	6.1822	5.1156	5.3816	6.5518	6.2068	5.6333	8.3451	6.5248	7.657	5.8461	10.8522	6.5672	7.9866	8.9371	7.6462	9.1097	7.4464	7.7624	4.9018	8.3469	6.7898	10.0476	7.9262	7.5045	8.2883	11.4191	6.5916	5.524	5.9721	6.1793	6.1759	6.8636	8.9431	7.8275	8.3159	9.231	10.2198	12.537	7.8025	7.2263	11.5461	11.0239
HF1255	102	1	12.5612	6.5276	10.5687	7.8446	6.7124	6.8279	5.0528	4.8789	6.7084	6.1985	5.7494	9.0203	6.5318	7.2162	5.8581	11.0209	7.2441	8.428	9.1948	7.351	9.3039	8.3491	8.0988	4.9974	9.0571	8.4589	9.6857	10.2492	7.7483	8.1963	11.7916	6.7879	5.5366	5.7738	6.0923	6.4076	6.7389	9.0318	7.955	7.744	9.2797	10.1154	12.5415	9.0807	7.2058	12.2147	9.351
E10001	258	1	12.8584	6.8107	11.2006	6.8092	6.5817	5.9993	5.2295	4.7675	7.085	6.2764	5.4404	8.5331	6.3175	7.4515	5.9749	10.4503	7.1434	7.595	9.4915	7.1674	9.2189	8.9757	8.5939	5.0687	9.0753	6.3479	10.1167	8.1806	7.4531	7.2562	11.9274	6.3772	5.5687	5.9109	6.0063	5.8438	6.9243	8.2218	8.2322	8.4833	8.8673	9.536	12.4507	8.4255	7.3573	11.6608	8.3367
HF0108	3903	0	12.534	6.4626	10.8826	7.537	6.89	6.1748	5.4019	5.0493	6.7969	6.2995	5.6961	7.2663	6.5301	7.7079	6.0111	10.5562	7.1993	7.8116	9.6549	7.8306	9.1949	8.2382	7.8059	4.9834	9.1615	5.9677	9.5948	7.9484	7.8249	7.849	11.8662	6.7244	5.6429	6.0217	6.3452	6.306	7.2971	8.8729	7.6645	7.7005	9.0124	9.4249	12.6257	8.3545	7.2901	10.8282	7.8402
HF1587	2226	0	12.4794	6.6644	11.3346	7.7937	6.6686	5.837	5.1369	4.7147	6.6487	6.0935	5.5974	8.0478	6.3234	8.5103	6.128	10.176	7.5755	7.7363	8.6177	7.3753	9.0307	8.5558	7.5363	5.6192	10.0866	6.1163	9.5474	7.6422	7.8775	8.1254	12.3648	6.5881	5.773	6.0277	6.1034	6.2429	6.6237	9.3452	8.2146	7.8034	9.2846	9.9043	12.9362	9.6088	7.2467	11.7993	9.0927
HF1588	2226	0	11.9983	6.3409	10.8425	7.0021	6.7781	6.3869	5.4044	5.2574	6.6648	6.3107	5.5999	7.6366	6.4464	7.5195	6.0792	9.8808	7.4759	8.0188	8.1044	8.0823	8.6529	9.3577	7.5446	4.7799	8.447	6.098	9.3247	7.4516	7.4793	7.7191	11.8086	6.7995	5.5615	5.8749	6.533	6.8751	6.818	9.4826	7.6675	7.4214	9.2126	9.1375	12.3275	8.1765	7.1859	10.6968	10.2245
E09860	1089	0	12.4501	6.4352	11.1074	7.3253	6.4295	5.8966	5.0911	4.644	6.805	6.1155	5.5686	8.0501	6.5241	7.7989	6.0293	9.7891	7.7096	7.9955	8.3951	7.3181	9.0186	9.6977	7.8141	5.0785	8.6115	6.6478	9.6614	8.5256	7.4547	8.2634	12.3126	6.6472	5.9045	6.0021	6.5774	5.9963	6.9738	9.2559	7.9491	7.8182	9.2374	9.8638	12.8736	8.957	7.3014	11.9089	9.0189
HF1708	2004	0	12.0067	7.1108	10.8171	8.8142	6.5824	6.1636	5.0533	4.7208	6.6422	6.2638	5.5758	8.2306	6.3575	7.9899	6.8456	10.68	7.2882	7.7918	8.5928	7.2601	9.2777	8.572	7.72	5.883	9.6849	7.6108	9.4218	8.5156	7.749	7.8569	12.0967	6.5622	5.4356	5.8796	6.2736	6.3159	6.6909	9.3141	7.851	7.69	8.969	10.2632	13.0871	9.1932	7.237	11.3378	8.5244
E09804	1254	0	12.4112	6.3352	11.1105	6.8423	6.7073	6.1028	5.0288	5.0746	6.6921	6.2986	5.6646	7.9867	6.274	8.4279	6.004	9.6411	7.5133	8.004	8.4049	7.6541	8.9151	9.1782	7.5773	4.8769	9.199	6.1089	9.7384	7.8467	7.9041	8.3617	12.2062	6.6501	5.7094	5.9302	6.3572	6.3125	6.6911	9.5024	8.109	7.6591	9.1129	9.8485	12.8276	9.0205	7.1646	11.0495	9.6672
HF0017	3939	0	12.1413	5.5096	10.7545	7.8188	7.0803	6.1534	5.6224	5.0448	6.8974	6.4053	5.9098	7.645	6.2702	8.1036	6.3621	10.149	7.439	7.7585	8.88	7.915	8.4458	6.8839	8.032	4.8133	8.2777	6.2121	8.9976	8.1427	7.3235	7.7781	11.6521	6.9684	5.8389	6.4195	6.6301	6.9478	6.7962	9.3218	7.4624	7.445	8.5726	8.7651	12.3361	8.7739	6.8606	11.5749	9.6269
HF0975	1080	1	12.7407	6.0711	10.9618	7.4816	6.8413	5.888	5.2169	4.8113	6.6827	6.2091	5.6715	7.9965	6.3488	8.6491	6.1065	9.7032	7.7435	7.9348	8.2357	7.7131	9.0469	9.3415	7.6255	5.072	9.3905	5.8119	9.6764	7.5124	7.5734	8.0755	12.0597	6.7044	6.3382	6.3306	6.4064	6.3576	6.9435	9.2937	7.8018	7.6472	9.1177	9.229	12.7063	9.1085	7.1946	11.5483	9.7468
E09826	678	1	12.3411	6.1394	10.375	7.8768	6.672	6.9474	5.6474	4.8001	6.6674	6.0373	5.4472	8.2049	6.4568	7.4468	5.9062	10.8949	6.812	7.9215	9.0156	7.593	8.9953	7.763	7.9081	4.9027	8.7974	7.4738	9.5185	9.0432	8.0981	8.3004	11.6644	6.5985	5.7029	5.7291	6.4274	6.4478	6.7084	9.2336	7.9478	7.2162	9.2515	9.78	12.7822	8.3519	7.0191	11.3278	10.2658
HF1702	159	1	12.3793	6.6892	10.7244	7.5875	6.6818	6.348	5.0925	5.8597	6.67	6.1492	5.6674	7.7965	6.4335	7.3312	6.0819	11.0351	7.5416	8.0161	9.3064	7.5938	8.7713	8.7923	7.6182	4.7615	8.065	7.2393	9.7275	9.33	7.6576	8.185	12.2309	6.5909	5.572	5.7225	6.4461	6.4221	6.779	8.791	7.843	7.9955	9.0592	9.4483	12.1848	8.4289	7.0102	12.3883	8.2866
HF0327	579	1	12.6258	6.4926	10.8679	7.9439	6.7224	6.4933	5.365	6.4244	6.597	6.2277	5.5963	8.799	6.4932	6.8777	6.0416	10.7416	7.076	7.8281	9.7056	7.4145	9.4943	8.3373	7.9229	4.917	8.2396	6.8949	9.5465	10.7679	8.037	8.1496	11.3155	6.543	5.5766	5.7797	6.2136	6.1608	6.6564	9.2449	7.9752	7.4589	9.3399	9.4634	12.1095	8.018	7.1997	12.3702	9.5078
900_00_5468	297	1	12.5611	6.1984	11.0317	8.1951	6.6818	6.962	5.2084	4.8671	6.703	6.2234	5.6639	8.252	6.5617	7.6023	5.9341	10.9048	7.4179	8.1104	9.4113	7.6503	8.438	9.3421	8.1681	5.0904	8.9524	7.8265	9.5763	9.5911	7.7556	8.32	12.4621	6.5923	5.9855	5.8823	6.1051	6.3908	6.7698	9.7623	7.8275	7.8261	9.396	9.7072	13.1536	8.8723	7.0916	11.3907	9.474
HF1316	204	1	12.2744	6.5864	10.5711	7.8392	6.6187	6.9649	5.2904	4.6314	6.5499	5.9293	5.4067	8.3026	6.5986	7.0844	6.0081	11.304	7.1121	7.948	9.3439	7.1549	9.2432	8.2885	7.8721	4.8829	8.7926	7.8046	9.4042	9.6738	7.4866	8.6698	12.1811	6.3972	5.3732	5.7816	6.0641	6.3119	6.5823	9.2893	8.3008	7.391	9.435	9.8678	12.7472	8.5865	7.1294	12.1047	9.3662
HF1334	3423	1	13.0225	5.3312	11.1057	7.574	7.0101	6.5924	5.5731	5.0009	6.9206	6.6162	6.0459	8.4058	6.7334	7.1504	6.6103	10.194	6.9678	8.3327	9.2229	7.6551	8.3918	8.6789	8.1906	5.0601	8.7901	6.5679	9.5711	8.9093	7.4302	8.3005	12.0752	7.2299	6.039	6.4735	6.6952	6.7482	6.9651	9.2123	7.5709	7.6797	8.8928	9.888	12.6532	8.8969	6.9746	11.8411	9.18
MD550715	948	0	11.8338	5.432	10.7071	8.147	6.8941	6.2214	5.1514	5.1082	6.8964	6.4556	5.7929	7.8384	6.4082	7.3453	6.5869	9.7569	7.2141	7.7715	8.8497	7.8717	8.9154	8.5315	7.4754	5.0923	8.2117	6.5009	9.3977	8.1977	7.3517	8.0176	11.3868	6.7861	5.6547	6.0777	6.3839	6.5833	7.0147	8.9408	7.2466	8.0922	8.2961	9.3526	12.2414	8.3988	6.8152	11.0552	8.8564
E09867	1143	0	12.9198	5.4643	10.9262	6.7176	6.569	5.9313	5.1076	4.9273	6.6163	6.1719	5.7286	7.9216	6.3092	8.1768	6.2277	9.8006	7.7821	8.0868	8.2014	7.6914	9.1159	8.5727	7.4445	5.018	9.0325	5.6116	9.6997	7.9414	7.9396	7.8646	12.0802	6.7766	6.6427	5.978	6.3591	6.6276	6.7616	8.9898	7.8247	7.5099	9.1761	8.7985	12.4706	8.7587	6.8929	10.3019	9.6079
HF1442	1395	1	12.3639	6.5304	10.5271	8.0984	6.9665	6.0498	5.055	4.8838	6.9303	6.251	5.6616	8.348	6.5651	7.4332	6.1647	10.4293	7.359	7.8349	9.2519	7.3622	8.9517	7.9585	8.0727	5.1363	9.5649	6.8343	9.5657	7.5413	7.6494	7.9132	12.1712	6.6959	5.8606	6.0686	6.408	6.298	6.7851	9.2532	7.4911	7.8048	8.8141	10.0188	12.7603	9.0993	7.3135	11.2108	9.2621
HF1136	1341	1	12.9021	6.5945	11.222	7.493	6.7129	6.2032	4.9651	4.9153	6.6985	6.1883	5.6248	8.3316	6.6144	7.9979	6.0281	10.5701	7.1446	7.7475	9.8532	7.6554	9.9708	8.3563	7.9929	4.8337	8.9363	6.8748	9.8529	8.3428	8.1404	8.0948	11.7968	6.5484	5.6323	5.7553	6.3486	6.2945	6.7234	8.5717	7.9846	8.8505	9.1531	8.05	11.6213	7.9388	7.3501	11.4633	8.2085
HF0022	3960	0	12.0091	6.3319	10.9171	7.1889	6.9067	6.0051	5.1864	4.8891	6.8856	6.3964	5.6934	7.9001	6.2211	7.4714	6.078	9.509	7.3504	7.6516	8.3615	7.7579	8.9597	9.7926	7.8242	5.259	10.0686	6.0181	9.1921	7.501	7.5868	8.1294	11.8604	6.6915	5.8145	6.527	6.4857	6.5349	6.7331	9.2863	7.8554	7.5539	8.8781	10.044	12.329	9.3284	7.5449	11.2716	9.1174
HF0757	2214	1	11.9933	5.0379	10.4331	7.5843	6.9741	7.5511	4.9279	5.1279	6.9971	6.6037	6.1056	8.6148	7.2518	6.4562	6.4454	10.4948	6.9486	7.6196	8.3667	7.801	8.8104	7.5859	7.7181	5.2	7.9205	8.5173	9.2255	10.164	7.1315	7.7192	11.8043	6.8206	6.806	5.4338	6.9512	6.6576	7.5431	8.6039	7.6557	6.7854	8.887	8.7676	11.92	7.3422	7.1391	12.2191	8.8108
HF1493	1239	1	13.237	5.6405	11.1214	7.9364	7.0204	5.9693	5.3774	5.8044	6.8572	6.2689	5.6432	7.9456	6.404	7.9652	6.2375	9.4306	7.4838	7.8922	8.416	7.7375	8.9272	7.1441	7.8918	5.0156	8.708	5.5762	9.7436	8.6565	7.1832	7.6777	12.1934	6.8825	6.0186	6.1795	6.2258	6.579	6.6215	8.6948	7.6247	7.9803	9.1337	8.6876	11.7367	8.0361	7.3044	10.9768	8.1008
HF1325	2499	0	13.0131	6.2524	10.9895	7.1559	6.9934	6.5918	5.5172	4.8788	6.8486	6.5051	5.8176	7.3864	6.4167	8.887	6.187	10.4143	6.9969	7.9533	9.3705	7.5058	8.9997	7.9248	7.8673	4.7706	8.0966	6.0609	9.6609	8.2772	7.4545	7.8854	12.2464	6.6274	5.8746	6.2113	6.4745	6.4113	6.7625	8.9003	7.6968	7.5958	8.8844	9.0606	12.4894	8.4277	6.9903	10.853	10.3465
HF1606	2178	0	12.1416	6.3243	10.9471	7.8152	6.7751	6.2765	5.2593	4.6054	6.6174	6.3988	5.8173	8.0988	6.5436	7.3397	6.1815	10.4898	7.5387	7.7317	8.9047	7.5389	8.8865	8.9952	7.8873	4.9501	8.0255	6.9207	9.7049	8.896	7.6721	8.0151	11.8639	6.5839	5.6465	5.8943	6.3695	6.2762	6.7847	8.8886	7.7734	7.7283	8.7654	9.2386	12.6777	8.5463	7.0352	11.392	8.8644
900_00_5547	237	1	12.5032	6.2677	11.2242	7.6646	6.8273	6.1746	5.206	4.8717	6.7905	6.3299	5.7465	8.206	6.3356	7.6885	6.3515	9.9156	7.6435	8.0971	8.3913	7.8413	9.0444	9.6202	7.683	5.1581	9.0252	6.0796	9.7632	8.2602	7.5347	8.0974	12.2272	6.8785	6.256	6.2126	6.3084	6.5674	6.6078	9.1761	7.7039	7.5704	9.1642	9.7484	12.5665	8.715	7.0397	11.3612	9.6057
E09358	3759	0	12.6496	5.7337	10.8367	7.245	6.7622	5.6683	5.1926	4.9567	6.5792	6.2696	5.623	7.4553	6.4676	8.4714	6.1364	9.515	7.5551	7.6438	8.1792	7.611	9.0107	8.9854	7.2134	5.2106	8.6876	5.4744	9.4738	7.5786	7.8472	7.9119	11.7025	6.6392	6.3027	6.0172	6.3642	6.4549	6.8694	9.3158	7.4565	7.8207	9.0506	9.2111	12.2957	8.6916	7.292	11.0567	9.4099
HF0252	3642	0	11.6095	6.1747	10.8352	7.2872	6.8404	6.1133	5.3326	4.7987	6.746	6.307	5.737	7.8455	6.2283	8.1288	6.4716	10.226	7.8447	7.6971	8.7503	7.8388	8.8786	8.7498	7.3328	5.5302	10.2341	6.1037	9.2661	8.0712	7.5777	7.8879	11.9222	6.7999	5.6724	6.1581	6.6405	6.673	6.9355	9.3277	7.5489	7.4617	8.999	9.8507	12.5901	9.5442	7.3097	11.6925	9.1048
HF1409	375	1	12.1977	6.186	10.1956	7.8832	6.8737	6.2642	5.0739	5.2992	6.6061	6.2802	5.6704	8.2343	6.4279	7.2589	5.9458	11.3684	7.3669	7.9814	8.4667	7.4224	9.0206	6.8858	7.588	4.8694	8.4647	6.8435	9.2377	8.9703	7.2692	7.8147	11.4585	6.6247	5.4846	5.8812	6.2477	6.3434	6.6915	9.2181	7.4535	7.3568	9.4418	9.9697	12.816	8.078	7.4048	12.6352	9.0506
900_00_5477	147	1	12.3537	6.1284	11.0339	7.8124	6.6575	5.9016	5.2436	4.7792	6.8489	6.2834	5.8642	8.5358	6.3224	7.1687	6.108	10.0334	6.7659	7.6905	9.2058	7.5334	9.3989	8.3325	7.7958	5.4702	10.3253	6.3598	9.3881	8.5019	7.4995	8.015	11.8717	6.7229	5.8496	6.0107	6.3398	6.4861	6.8739	9.2505	7.7607	7.6023	9.0307	11.0016	12.9278	9.5691	7.1509	10.6892	8.3352
MD550239	453	1	12.0448	6.3451	10.7798	8.0887	6.6855	6.2213	4.918	4.8262	6.7038	6.0727	5.4826	7.8365	6.2488	7.0737	5.9392	10.7976	6.7289	7.9545	8.7758	7.6571	8.7941	8.581	7.844	5.2627	9.4205	6.5769	9.2428	7.7846	7.8374	8.3255	11.2396	6.5348	5.4941	5.9904	6.3488	6.1534	6.8356	9.5302	7.5725	7.4114	9.1054	10.0494	12.685	9.2223	7.3121	11.5554	10.0384
HF0087	2331	1	12.8534	6.2592	11.1025	7.528	6.78	5.9828	5.2828	4.8308	6.7671	6.3091	5.7102	7.6067	6.4679	8.3175	6.2347	10.0525	7.4154	7.9381	8.853	7.5521	8.8314	8.6337	7.6767	5.0723	9.0813	5.7951	9.5713	7.643	7.4149	8.0892	12.1731	6.6904	6.1761	6.0487	6.3504	6.4869	6.5741	9.3547	7.6355	7.7351	9.2181	9.4218	12.4458	8.9665	7.2433	10.9064	10.0935
HF1344	264	1	13.0339	6.4113	10.7111	7.2564	6.7646	6.137	5.0833	5.936	6.5379	6.0413	5.4942	7.9827	6.3297	7.6397	5.865	10.9991	6.9789	7.989	9.5927	7.3987	9.0377	7.744	7.7177	4.935	8.8349	6.7197	9.3927	8.3726	8.0439	8.0638	11.5718	6.4734	5.4492	5.9167	6.2341	6.1876	6.7104	9.3379	8.3374	7.4902	9.8944	9.7822	12.6388	8.4044	7.0301	11.3122	10.7346
HF0962	3447	0	12.1965	6.454	10.7935	7.4138	6.8235	6.3311	5.1459	4.752	6.8442	6.425	5.6715	7.3752	6.2487	7.5227	6.2308	9.3338	7.6794	8.0321	8.155	7.7328	8.4178	9.9418	7.3499	4.9367	8.6733	5.6752	9.4015	7.3375	7.5884	7.7649	11.8763	6.7336	5.8216	6.0636	6.0165	6.619	6.7226	9.2006	7.7364	7.4013	9.1451	9.5244	12.2964	8.688	7.0903	10.7615	10.0966
HF1242	4407	1	12.8341	6.7222	11.091	7.7043	6.6989	6.3758	5.1719	4.9967	6.6434	6.1254	5.6749	8.8475	6.4256	7.6749	6.0157	11.2431	6.5347	8.1967	9.3325	7.5624	9.1816	8.1764	7.7189	4.8379	8.5918	7.4543	9.8364	10.2743	7.5341	8.2162	12.1829	6.4416	5.6995	5.6319	6.3698	6.3274	6.7342	9.3305	8.1427	8.1259	9.3388	9.2246	12.552	8.2327	7.1277	12.0321	8.464
E09893	3309	1	13.3006	6.0985	11.0989	7.1593	6.9876	5.9869	5.1876	5.5726	6.8829	6.4237	5.89	7.5307	6.4122	7.9161	6.5727	9.2099	7.4335	7.8516	8.0844	7.6434	8.963	8.0311	8.142	4.9358	9.5812	6.1361	9.9276	9.4566	7.2642	7.5799	12.0213	7.0734	6.2608	6.0624	6.6658	6.9547	7.0943	9.0691	7.8453	8.017	8.7314	8.6293	11.5078	7.8922	7.0573	11.1811	8.4662
HF0778	240	1	11.6624	4.9335	10.2521	8.0299	6.9257	6.2846	5.3651	5.2811	6.7353	6.7796	5.9486	8.8886	6.5079	6.6296	6.2631	9.7911	7.9236	7.7858	8.6386	7.6027	9.6172	7.9359	7.4821	4.9499	9.0979	6.868	9.8565	8.6441	7.5346	8.0112	11.8323	6.9622	5.7619	5.9806	6.3966	6.6227	6.9499	8.917	8.273	7.9593	8.2551	10.2996	12.5216	8.5651	7.2688	11.0277	8.8812
HF1032	831	1	11.1742	5.9377	10.58	7.6095	6.9415	6.0965	5.1526	4.9015	6.9282	6.5338	6.1208	7.9923	6.3508	7.5407	6.48	9.4505	7.3223	7.4882	8.1511	7.8742	9.1216	8.108	7.6847	5.746	10.7975	6.2766	8.8087	7.5149	7.5032	7.9046	11.2504	6.7508	5.9199	6.5542	6.5949	6.8387	6.824	8.6061	7.5981	7.3283	9.043	10.338	12.1255	9.8744	7.4699	10.6189	8.7966
E09656	1011	1	12.5336	6.8222	11.0782	6.8274	6.7269	6.408	5.0591	5.3119	6.8448	6.2895	5.7016	8.4835	6.7004	8.3124	6.1596	11.1147	6.9484	8.0654	9.668	7.0953	9.1194	7.8761	7.9942	4.8518	8.8795	6.6644	9.4905	9.352	8.0515	8.117	12.2708	6.8697	5.6388	5.9405	6.318	6.228	6.702	8.9636	8.0472	7.7401	9.5529	9.1852	12.5624	8.4899	7.5828	12.011	9.3991
HF1000	1191	1	12.8572	6.697	10.4767	7.3974	6.8702	6.2474	5.1911	4.6897	6.7609	6.339	5.69	7.799	6.6475	8.0856	6.1213	10.7049	7.5728	8.1598	8.7372	7.5164	8.8923	8.3561	7.9633	4.9883	9.0721	6.1643	9.5038	8.4537	6.8192	7.8547	11.826	6.6253	5.8194	6.1265	6.2392	6.2497	6.8575	9.1144	7.6408	7.898	8.9451	9.4826	12.5495	9.0908	6.8554	11.7862	10.3215
E09511	366	1	12.4693	6.4678	10.4293	7.8321	6.6927	7.0518	5.2055	5.1398	6.6712	6.1235	5.6753	9.1852	6.6588	7.4593	5.9133	10.1854	8.2103	7.6267	8.8115	7.4989	8.6337	8.6013	8.1597	5.0592	8.8478	8.5833	9.5809	11.6924	7.4666	8.2865	11.8979	6.5686	5.8005	5.8766	7.0152	6.4954	6.761	9.0048	7.868	7.711	9.162	10.0779	11.998	8.9546	7.2766	12.6951	7.7092
HF0089	234	1	11.8883	5.7778	10.3615	7.5974	6.7512	6.7166	5.3456	5.2934	6.6882	6.1332	5.5626	8.434	6.4485	7.1744	5.9915	10.6884	7.8904	7.8767	9.0062	7.3107	8.877	7.3344	7.7493	5.0775	8.8077	7.4225	9.6275	9.8226	7.2569	8.5	12.3428	6.4698	5.6794	5.9986	7.191	6.2715	6.7851	8.9119	8.2049	7.759	9.2304	9.9009	12.5361	8.5573	7.5267	12.6677	10.368
HF1475	939	1	12.7017	6.331	10.7993	7.6812	6.6869	6.5182	5.4747	5.1187	6.6854	6.3532	5.905	8.0097	6.466	8.157	6.0607	10.7006	6.8632	7.8658	9.0504	7.7128	8.6361	8.5097	8.1318	4.8694	8.5933	6.6999	9.5861	8.4666	7.6418	8.1403	11.9716	6.6866	5.6682	6.1282	6.5027	6.5155	6.979	8.9914	7.5716	7.33	9.0702	9.6458	12.5738	8.4658	7.0423	10.9644	10.3421
HF1150	627	1	12.1609	6.1129	10.7044	7.4152	6.8642	6.2675	5.2344	5.1136	6.8796	6.3803	5.6455	8.0435	6.6994	6.3505	6.1942	10.4904	6.6111	7.9431	8.8816	7.8298	8.7414	6.541	7.8889	4.9576	7.5286	6.4583	9.1377	8.5079	7.2652	8.2668	10.8496	6.5041	5.6315	5.9818	6.3139	6.4769	6.9709	9.5347	7.4313	7.8818	9.1598	9.7077	12.2982	7.6645	7.4917	11.231	11.4346
E09855	1137	0	12.8407	6.1594	10.993	7.6336	6.7563	6.3734	5.061	4.9601	6.6475	6.1278	5.4934	8.2849	6.4809	7.7295	6.0978	10.3957	7.1658	7.5504	9.3253	7.1879	10.0636	8.544	7.8164	5.3813	10.3967	7.4809	9.6306	9.532	7.8112	8.1629	12.0786	6.6981	5.8423	6.0268	6.3367	6.4117	6.723	9.4598	8.4028	7.8274	9.3531	9.9494	12.4536	9.331	7.1323	11.8471	7.9158
E09681	3318	0	12.0891	5.505	10.4781	7.5342	7.0607	6.1677	5.1864	4.7013	7.0085	6.5083	6.1576	8.0235	6.3465	7.1426	6.3908	10.1563	7.185	7.8774	8.6172	7.5556	8.6345	7.8455	8.1683	4.9524	8.5563	6.3903	9.6239	7.8759	7.0593	7.9307	11.523	6.9876	5.9982	6.3037	6.6853	6.3157	6.9236	8.8274	7.912	7.8186	8.8344	9.5397	12.3165	8.4632	7.3714	11.0472	9.1168
900_00_5549	177	1	12.8982	6.5249	10.349	7.7173	6.5331	6.4897	4.9352	5.0537	6.7472	6.2284	5.7617	8.3911	6.8653	7.5524	5.9549	11.3707	7.4627	8.274	9.8486	7.1209	8.0177	7.351	7.6637	5.1004	8.2335	7.9008	9.7753	9.7966	8.402	8.1949	12.5731	6.5869	5.7831	6.0054	6.2652	6.1907	6.6131	9.5545	8.1074	7.4513	9.5308	9.454	12.716	8.7226	7.5446	12.3259	8.6132
HF0960	2622	1	12.3769	6.8115	10.5623	8.0895	6.7977	6.305	5.0158	4.9978	6.7558	6.3381	5.8044	7.82	6.3675	8.7588	6.1806	11.0153	7.7898	7.98	8.9326	7.7502	8.625	7.7884	7.7267	4.8581	8.2662	6.2961	9.6771	8.2274	7.5349	8.16	12.0535	6.7378	5.7874	6.1617	6.2839	6.4242	6.735	9.0557	7.9498	7.5881	8.8641	9.0243	12.8354	8.6715	7.038	11.7153	9.4588
HF0608	312	1	12.0906	6.1415	10.4277	7.9499	6.7805	7.3779	5.1729	5.0143	6.6417	6.4429	5.6242	8.1039	6.3685	6.6961	6.2583	11.1223	7.3094	7.6623	9.0575	7.6519	8.4127	7.685	7.7395	4.8614	8.6976	7.4694	9.1318	10.1285	7.46	8.6227	12.3914	6.8485	5.6474	6.0139	6.7074	6.8041	6.6831	8.9718	8.137	6.9558	9.3904	9.57	12.4157	8.5692	7.0275	12.423	11.4928
HF0816	1380	1	12.3739	6.2937	11.0672	8.5239	6.6627	5.924	4.9327	5.1723	6.5687	6.092	5.7725	8.364	6.303	7.5493	5.9152	11.0283	7.0821	8.2287	9.2722	7.3961	9.1195	8.5315	7.6803	4.8583	8.8888	6.7324	9.6968	10.6797	7.2829	8.1335	11.472	6.6211	5.5216	5.5829	6.4384	6.224	6.6387	9.5566	8.4915	7.6974	9.3536	9.839	13.2142	8.7621	7.0539	12.3573	9.2037
HF1407	153	1	12.4206	5.8495	10.8276	8.5505	6.8875	6.6709	4.9153	4.878	6.6727	6.0038	5.5104	8.4722	6.4564	7.3356	6.1208	11.1662	7.4392	8.1255	8.9693	7.3245	9.0254	8.366	8.0319	4.8603	8.4903	7.5938	9.6238	9.654	7.0136	8.1923	11.7829	6.5555	5.5871	6.1217	6.6077	6.1857	6.8424	9.8372	8.1697	7.8557	9.4944	10.1271	13.0063	8.3477	7.2428	12.4903	9.0681
[truncated: 143 more columns]
