# Supplementary material for: Characterization of the Ferroptosis-Related Genes for Prognosis and Immune Infiltration in Low-Grade Glioma
Source: Front Genet. 2022 Apr 26;13:880864. doi: 10.3389/fgene.2022.880864 (PMC9086515; doi:10.3389/fgene.2022.880864)
Supplement: Supplementary file 7 [file Table7.XLSX]

## Sheet: Sheet1
Table S7. The calculated coefficient of the nine FRGs.
Gene	Coef
DPP4	0.124358
CAPG	0.120686
HSPB1	0.348534
AURKA	0.354588
SESN2	1.28556e-05
PGD	0.0466643
ARNTL	0.58348
LAMP2	0.247444
EIF2AK4	0.562549
