# Supplementary material for: Characterization of the Ferroptosis-Related Genes for Prognosis and Immune Infiltration in Low-Grade Glioma
Source: Front Genet. 2022 Apr 26;13:880864. doi: 10.3389/fgene.2022.880864 (PMC9086515; doi:10.3389/fgene.2022.880864)
Supplement: Supplementary file 8 [file Table8.XLSX]

## Sheet: Sheet1
Table S8. The correlations of 210 ARGs with the risk score were assessed by the Pearson correlation coefficient.
id	Cor	p-value
BID	-0.502	9.73e-34
GRID1	-0.502	8.04e-34
MAPK8	-0.499	2.43e-33
PEA15	-0.488	1e-31
SAR1A	-0.453	4.1e-27
EEF2	-0.422	2.13e-23
ST13	-0.406	1.24e-21
SIRT1	-0.403	2.68e-21
TSC1	-0.367	1.25e-17
BAG1	-0.327	3.85e-14
NRG3	-0.321	1.28e-13
GRID2	-0.315	3.62e-13
MLST8	-0.307	1.48e-12
PTEN	-0.307	1.59e-12
PTK6	-0.294	1.45e-11
PELP1	-0.285	5.57e-11
TSC2	-0.281	1.19e-10
MAPK3	-0.273	3.82e-10
WDFY3	-0.273	3.73e-10
GABARAP	-0.264	1.43e-09
GOPC	-0.259	3.17e-09
MYC	-0.256	4.66e-09
HSP90AB1	-0.251	9.15e-09
MAPK8IP1	-0.249	1.35e-08
CX3CL1	-0.241	3.71e-08
GABARAPL2	-0.238	5.49e-08
MAPK9	-0.21	1.71e-06
KIF5B	-0.205	3.17e-06
SIRT2	-0.203	3.87e-06
NBR1	-0.201	4.83e-06
BNIP3	-0.193	1.23e-05
RB1CC1	-0.192	1.27e-05
ATG2B	-0.184	3.15e-05
GABARAPL1	-0.182	3.81e-05
DAPK1	-0.172	9.8e-05
FOXO3	-0.172	9.55e-05
CDKN1B	-0.166	0.000178
NCKAP1	-0.153	0.000562
PINK1	-0.151	0.000654
RAB24	-0.143	0.001
RAF1	-0.135	0.002
BIRC6	-0.125	0.005
USP10	-0.123	0.005
MAPK1	-0.115	0.01
ATG16L2	-0.112	0.011
HGS	-0.105	0.018
CAMKK2	-0.1	0.025
NRG2	-0.094	0.035
ULK1	-0.093	0.037
BNIP3L	-0.084	0.059
ATG2A	-0.062	0.165
AMBRA1	-0.06	0.174
UVRAG	-0.053	0.235
MBTPS2	-0.051	0.247
KLHL24	-0.042	0.347
HDAC6	-0.033	0.452
PIK3C3	-0.033	0.451
HSPA8	-0.019	0.674
NKX2-3	-0.017	0.698
ATG12	-0.016	0.724
PRKCQ	-0.015	0.736
RELA	-0.013	0.775
ATIC	-0.009	0.848
ATG9A	-0.008	0.859
ITPR1	-0.008	0.854
RPTOR	-0.007	0.874
EIF2S1	-0.006	0.897
NPC1	0.002	0.963
EIF4EBP1	0.005	0.913
ATF4	0.011	0.808
ULK2	0.015	0.743
MAP2K7	0.018	0.69
RPS6KB1	0.026	0.564
BCL2	0.029	0.519
ZFYVE1	0.029	0.518
BAG3	0.031	0.479
ATG4B	0.044	0.32
HSPB8	0.046	0.305
MAP1LC3B	0.062	0.166
FKBP1B	0.064	0.153
PIK3R4	0.064	0.15
BNIP1	0.067	0.129
SPNS1	0.075	0.091
ATG4D	0.096	0.03
RAB5A	0.098	0.027
ARSB	0.102	0.022
ARNT	0.112	0.011
ATG3	0.113	0.011
CALCOCO2	0.113	0.011
PEX14	0.115	0.01
RAB11A	0.115	0.009
TP63	0.116	0.009
STK11	0.119	0.007
HIF1A	0.121	0.006
ULK3	0.121	0.006
ATF6	0.139	0.002
CHMP4B	0.142	0.001
ATG5	0.144	0.001
PARP1	0.144	0.001
BECN1	0.145	0.001
DAPK2	0.15	0.000716
NAF1	0.153	0.000538
CDKN1A	0.155	0.000461
CAPN10	0.156	0.000429
PEX3	0.156	0.000417
FOS	0.157	0.000375
SPHK1	0.158	0.000345
CD46	0.163	0.000235
CHMP2B	0.163	0.000216
WDR45	0.163	0.000225
CDKN2A	0.164	0.000204
TP53	0.164	0.000199
PRKAB1	0.169	0.000129
CLN3	0.17	0.000117
NRG1	0.178	5.53e-05
RAB7A	0.178	5.68e-05
CCL2	0.179	4.96e-05
VAMP7	0.185	2.75e-05
PRKAR1A	0.191	1.47e-05
TUSC1	0.192	1.27e-05
MTMR14	0.197	8.04e-06
TP53INP2	0.203	3.92e-06
IL24	0.204	3.62e-06
MTOR	0.208	2.3e-06
DNAJB1	0.217	7.63e-07
MAP1LC3A	0.222	4.22e-07
ATG16L1	0.23	1.51e-07
EEF2K	0.231	1.49e-07
IRGM	0.236	7.1e-08
GAA	0.239	4.99e-08
WIPI2	0.24	4.53e-08
ATG9B	0.249	1.26e-08
SESN2	0.253	7.72e-09
ATG7	0.254	6.63e-09
RAB1A	0.254	6.81e-09
PRKCD	0.259	3.06e-09
TNFSF10	0.263	1.85e-09
DNAJB9	0.264	1.5e-09
EIF2AK2	0.265	1.3e-09
DRAM1	0.267	9.52e-10
TP73	0.267	9.69e-10
DDIT3	0.275	3.06e-10
NLRC4	0.284	7.26e-11
VEGFA	0.285	5.64e-11
IFNG	0.286	4.71e-11
BCL2L1	0.287	4.29e-11
CAPN2	0.287	4.13e-11
RAC1	0.29	2.87e-11
ERN1	0.312	5.96e-13
ARSA	0.314	4.55e-13
FOXO1	0.321	1.29e-13
ATG10	0.327	3.87e-14
CTSD	0.329	2.84e-14
GAPDH	0.33	2.74e-14
LAMP1	0.331	1.89e-14
IKBKB	0.335	9.01e-15
TMEM49	0.338	4.45e-15
FKBP1A	0.356	1.15e-16
RHEB	0.358	8.39e-17
RB1	0.36	5.56e-17
BIRC5	0.361	4.65e-14
EIF2AK3	0.361	4.27e-17
PPP1R15A	0.364	2.31e-17
LAMP2	0.366	1.62e-17
VAMP3	0.367	1.31e-17
CCR2	0.37	6.14e-18
EDEM1	0.371	4.96e-18
FADD	0.371	5.28e-18
GNAI3	0.377	1.32e-18
FAS	0.383	3.17e-19
APOL1	0.384	3.01e-19
CANX	0.386	1.83e-19
TBK1	0.386	1.7e?19
BAK1	0.389	8e-20
CAPNS1	0.392	4.4e-20
ITGA3	0.397	1.15e-20
ATG4A	0.398	8.88e-21
SQSTM1	0.402	3.58e-21
BAX	0.403	3.14e-21
CXCR4	0.415	1.48e-22
RGS19	0.416	9.98e-23
TM9SF1	0.417	7.78e-23
ITGA6	0.419	4.88e-23
ITGB4	0.42	4.06e-23
IKBKE	0.423	2.06e-23
ATG4C	0.429	3.74e-24
HDAC1	0.429	3.74e-24
NFKB1	0.432	1.51e-24
EGFR	0.438	3.3e-25
EIF4G1	0.444	6.81e-26
CAPN1	0.449	1.47e-26
SERPINA1	0.452	6.32e-27
ITGB1	0.458	1.18e-27
MAP1LC3C	0.459	7.1e-28
CTSB	0.469	4.06e-29
NFE2L2	0.483	4.33e-31
RAB33B	0.494	1.3e-32
ERBB2	0.502	8.11e-34
NAMPT	0.514	1.41e-35
DLC1	0.531	2.71e-38
HSPA5	0.532	1.85e-38
CASP1	0.541	5.4e-40
SH3GLB1	0.549	2.09e-41
P4HB	0.558	7.07e-43
DIRAS3	0.561	1.96e-43
CASP3	0.562	1.3e-43
CFLAR	0.562	1.05e-43
WIPI1	0.575	3.89e-46
CASP4	0.633	2.91e-58
CASP8	0.672	5.77e-68
